# Supplementary material for: An efficient [3+2] annulation for the asymmetric synthesis of densely-functionalized pyrrolidinones and γ-butenolides
Source: Royal Society of Chemistry journal article supplement (doi:10.1039/d0cc05188h), 2020-01-01
Supplement: d0cc05188h1.pdf [file d0cc05188h1.pdf]

## Supporting Information

### **An Efficient [3+2] Annulation for the Asymmetric Synthesis of Densely-Functionalized Pyrrolidinones and $\gamma$ -Butenolides**

Hui Qian, Song Sun, Wanxiang Zhao, and Jianwei Sun\*

#### Table of Contents

|                                                                                                                    |             |
|--------------------------------------------------------------------------------------------------------------------|-------------|
| <b>I. General Information .....</b>                                                                                | <b>S-2</b>  |
| <b>II. Substrate Preparation .....</b>                                                                             | <b>S-3</b>  |
| <b>III. Silver-Catalyzed Synthesis of Chiral Pyrrolidinones .....</b>                                              | <b>S-12</b> |
| <b>IV. <math>\text{BF}_3 \cdot \text{OEt}_2</math>-Promoted Synthesis of <math>\gamma</math>-Butenolides .....</b> | <b>S-29</b> |
| <b>V. Product Transformations .....</b>                                                                            | <b>S-36</b> |
| <b>VI. Determination of the Product Structure.....</b>                                                             | <b>S-41</b> |

#### NMR Spectra

## I. General Information

All air or moisture sensitive reactions were conducted in oven-dried glassware under nitrogen atmosphere using dry solvents. Flash column chromatography was performed over silica gel (230-400 mesh) purchased from Qingdao Puke Co., China. Anhydrous dichloromethane, acetonitrile and tetrahydrofuran were purified by Innovative® solvent purification system. Anhydrous chloroform, toluene, diethyl ether, 1,2-dichloroethane, and hexane were purchased from Sigma-Aldrich® and used as received. <sup>1</sup>H and <sup>13</sup>C NMR spectra were collected on a Bruker AV 400 MHz NMR spectrometer using residue solvent peaks as an internal standard (<sup>1</sup>H NMR: CDCl<sub>3</sub> at 7.26 ppm, <sup>13</sup>C NMR: CDCl<sub>3</sub> at 77.16 ppm). Mass spectra were collected on an Agilent GC/MS 5975C system, or a MALDI Micro MX mass spectrometer, or an API QSTAR XL System.

## II. Substrate Preparation

All the siloxy alkynes are known compounds, which were prepared according to the literature procedure.<sup>1</sup>

### General Procedure A.

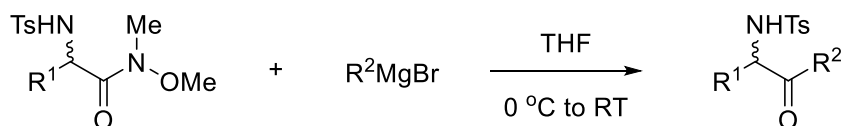

Under N<sub>2</sub>, a solution of the Weinreb amide<sup>2</sup> (3 mmol) in THF (15 mL) was cooled to 0 °C and treated with a solution of R<sup>2</sup>MgBr (8 mmol, 1.0 M in THF) dropwise over 5 min. The reaction mixture was stirred for 30 min at 0 °C and further 18 h at room temperature. Then, a saturated aqueous NH<sub>4</sub>Cl solution was added. The mixture was extracted with ethyl acetate (3 × 20 mL). The combined organic layers were washed with brine (30 mL), dried with Na<sub>2</sub>SO<sub>4</sub>, and concentrated under reduced pressure. The crude product was purified by silica gel flash chromatography to afford the desired ketone.

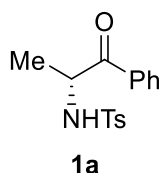

**(R)-4-Methyl-N-(1-oxo-1-phenylpropan-2-yl)benzenesulfonamide (1a)** was prepared according to the General Procedure A.

<sup>1</sup>H NMR (400 MHz, CDCl<sub>3</sub>) δ 7.77 (d, *J* = 8.0 Hz, 2H), 7.69 (d, *J* = 8.0 Hz, 2H), 7.61 – 7.57 (m, 1H), 7.47 – 7.43 (m, 2H), 7.17 (d, *J* = 8.0 Hz, 2H), 5.78 (d, *J* = 8.0 Hz, 1H), 4.93 (td, *J* = 9.0, 2.8 Hz, 1H), 2.32 (s, 3H), 1.41 (d, *J* = 7.2 Hz, 3H).

1. M. P. Schramm, V. Shubinets, and S. A. Kozmin, *Org. Synth.*, 2010, **87**, 253.
2. The Weinreb amide was synthesized by following the literature procedure:
  - a) S. B. Sdira, C. P. Felix, M.-B. A. Giudicelli, P. F. Seigle-Ferrand, M. Perrin, and R. J. Lamartine, *J. Org. Chem.*, 2003, **68**, 6632; b) M. G. Unthank, B. Tavassoli, and V. K. Aggarwal, *Org. Lett.*, 2008, **10**, 1501.

$^{13}\text{C}$  NMR (100 MHz,  $\text{CDCl}_3$ )  $\delta$  198.2, 143.7, 137.2, 134.2, 133.5, 129.8, 129.0, 128.6, 127.2, 53.5, 21.6, 21.3.

IR (neat,  $\text{cm}^{-1}$ ): 3278, 1686, 1597, 1340, 1162.

HRMS (CI) calculated for  $\text{C}_{16}\text{H}_{17}\text{NO}_3\text{S}$  [ $\text{M}^+$ ]: 303.0929, found: 303.0931.

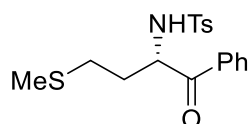

**1b**

**(S)-4-Methyl-N-(4-(methylthio)-1-oxo-1-phenylbutan-2-yl)benzenesulfonamide (1b)**

was prepared according to the General Procedure A.

$^1\text{H}$  NMR (400 MHz,  $\text{CDCl}_3$ )  $\delta$  7.77 (d,  $J = 7.9$  Hz, 2H), 7.66 (d,  $J = 7.8$  Hz, 2H), 7.59 – 7.51 (m, 1H), 7.46 – 7.37 (m, 2H), 7.10 (d,  $J = 7.9$  Hz, 2H), 5.87 (d,  $J = 8.9$  Hz, 1H), 5.06 (td,  $J = 9.0, 2.8$  Hz, 1H), 2.82 – 2.53 (m, 2H), 2.25 (s, 3H), 2.01 (s, 3H), 2.00 – 1.88 (m, 1H), 1.76 – 1.63 (m, 1H).

$^{13}\text{C}$  NMR (100 MHz,  $\text{CDCl}_3$ )  $\delta$  197.7, 143.7, 136.5, 134.2, 133.5, 129.7, 128.9, 128.5, 127.2, 56.3, 33.4, 30.3, 21.5, 15.5.

IR (neat,  $\text{cm}^{-1}$ ): 3512, 2957, 2868, 1741, 1169.

HRMS (CI) calculated for  $\text{C}_{18}\text{H}_{22}\text{NO}_3\text{S}_2$  [ $\text{M}+\text{H}^+$ ]: 364.1041, found: 364.1065.

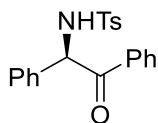

**1c**

**(R)-4-Methyl-N-(2-oxo-1,2-diphenylethyl)benzenesulfonamide (1c)** was prepared according to the General Procedure A.

$^1\text{H}$  NMR (400 MHz,  $\text{CDCl}_3$ )  $\delta$  7.80 (d,  $J = 8.0$  Hz, 2H), 7.54 (d,  $J = 7.7$  Hz, 2H), 7.51 – 7.42 (m, 1H), 7.38 – 7.29 (m, 2H), 7.23 – 7.11 (m, 5H), 7.04 (d,  $J = 7.9$  Hz, 2H), 6.36 (d,  $J = 7.4$  Hz, 1H), 6.02 (d,  $J = 7.4$  Hz, 1H), 2.27 (s, 3H).

<sup>13</sup>C NMR (100 MHz, CDCl<sub>3</sub>) δ 194.7, 143.2, 137.4, 135.7, 134.0, 133.8, 129.4, 129.1, 129.0, 128.7, 128.5, 128.2, 127.0, 61.7, 21.4.

IR (neat, cm<sup>-1</sup>): 3487, 2940, 1734, 1357, 1089.

HRMS (CI) calculated for C<sub>21</sub>H<sub>20</sub>NO<sub>3</sub>S [M+H<sup>+</sup>]: 366.1164, found: 366.1148.

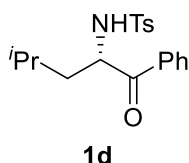

**(S)-4-Methyl-N-(4-methyl-1-oxo-1-phenylpentan-2-yl)benzenesulfonamide**

**(1d)** was prepared according to the General Procedure A.

<sup>1</sup>H NMR (400 MHz, CDCl<sub>3</sub>) δ 7.68 (d, *J* = 7.8 Hz, 2H), 7.63 (d, *J* = 7.8 Hz, 2H), 7.59 – 7.52 (m, 1H), 7.48 – 7.35 (m, 2H), 7.07 (d, *J* = 7.8 Hz, 2H), 5.61 (d, *J* = 9.5 Hz, 1H), 4.87 (td, *J* = 9.5, 3.9 Hz, 1H), 2.25 (s, 3H), 2.11 – 1.94 (m, 1H), 1.48 – 1.29 (m, 2H), 1.04 (d, *J* = 6.4 Hz, 3H), 0.88 (d, *J* = 6.7 Hz, 3H).

<sup>13</sup>C NMR (100 MHz, CDCl<sub>3</sub>) δ 198.7, 143.5, 136.7, 134.0, 133.9, 129.6, 128.9, 128.2, 127.3, 56.1, 43.1, 24.7, 23.4, 21.5, 21.2.

IR (neat, cm<sup>-1</sup>): 3467, 2878, 1637, 1344, 1091.

HRMS (CI) calculated for C<sub>19</sub>H<sub>24</sub>NO<sub>3</sub>S [M+H<sup>+</sup>]: 346.1477, found: 346.1491.

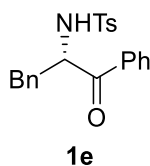

**(S)-4-Methyl-N-(1-oxo-1,3-diphenylpropan-2-yl)benzenesulfonamide (1e)**

was prepared according to the General Procedure A.

<sup>1</sup>H NMR (400 MHz, CDCl<sub>3</sub>) δ 7.71 (d, *J* = 7.7 Hz, 2H), 7.64 – 7.53 (m, 3H), 7.46 – 7.39 (m, 2H), 7.22 – 7.13 (m, 3H), 7.09 (d, *J* = 8.0 Hz, 2H), 6.98 (s, 2H), 5.61 (d, *J* = 8.8 Hz, 1H), 5.14 (dd, *J* = 14.5, 5.8 Hz, 1H), 3.14 (dd, *J* = 13.9, 5.7 Hz, 1H), 2.96 (dd, *J* = 13.9, 5.9 Hz, 1H), 2.29 (s, 3H).

<sup>13</sup>C NMR (100 MHz, CDCl<sub>3</sub>) δ 197.4, 143.6, 136.9, 135.0, 134.3, 134.1, 129.8, 129.7, 128.9, 128.5(2C), 127.2, 127.1, 58.2, 40.3, 21.5.

IR (neat, cm<sup>-1</sup>): 3425, 1634, 1448, 1159, 750.

HRMS (CI) calculated for C<sub>22</sub>H<sub>22</sub>NO<sub>3</sub>S [M+H<sup>+</sup>]: 380.1320, found: 380.1341.

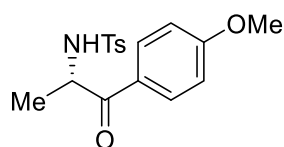

**1f**

**(S)-N-(1-(4-Methoxyphenyl)-1-oxopropan-2-yl)-4-methylbenzene**

**sulfonamide (1f)** was prepared according to the General Procedure A.

<sup>1</sup>H NMR (400 MHz, CDCl<sub>3</sub>) δ 7.76 – 7.72 (m, 2H), 7.68 – 7.65 (m, 2H), 7.13 (d, *J* = 8.0 Hz, 2H), 6.90 – 6.89 (m, 2H), 5.91 (d, *J* = 8.0 Hz, 1H), 4.91 – 4.84 (m, 1H), 3.83 (s, 3H), 2.28 (s, 3H), 1.35 (d, *J* = 7.1 Hz, 3H).

<sup>13</sup>C NMR (100 MHz, CDCl<sub>3</sub>) δ 196.3, 164.2, 143.4, 137.1, 130.9, 129.6, 127.0, 126.1, 114.0, 55.6, 52.9, 21.4, 21.3.

IR (neat, cm<sup>-1</sup>): 3282, 2979, 1673, 1600, 1093.

HRMS (CI) calculated for C<sub>17</sub>H<sub>20</sub>NO<sub>4</sub>S [M+H<sup>+</sup>]: 334.1113, found: 334.1091.

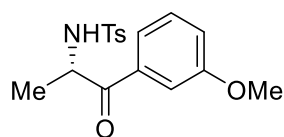

**1g**

**(S)-N-(1-(3-Methoxyphenyl)-1-oxopropan-2-yl)-4-methylbenzene**

**sulfonamide (1g)** was prepared according to the General Procedure A.

<sup>1</sup>H NMR (400 MHz, CDCl<sub>3</sub>) δ 7.71 – 7.69 (m, 2H), 7.35 – 7.32 (m, 2H), 7.29 – 7.28 (m, 1H), 7.18 – 7.10 (m, 3H), 5.93 (d, *J* = 8.0 Hz, 1H), 4.97 – 4.89 (m, 1H), 3.82(s, 3H), 2.32 (s, 3H), 1.40 – 1.38 (m, 3H).

<sup>13</sup>C NMR (100 MHz, CDCl<sub>3</sub>) δ 198.1, 160.0, 143.6, 137.1, 134.8, 129.9, 129.7, 127.1, 121.0, 120.5, 112.9, 55.6, 53.6, 21.5, 21.3.

IR (neat,  $\text{cm}^{-1}$ ): 3279, 2977, 1689, 1597, 1162.

HRMS (CI) calculated for  $\text{C}_{17}\text{H}_{19}\text{NNaO}_4\text{S}$  [ $\text{M}+\text{Na}^+$ ]: 356.0932, found: 356.0901.

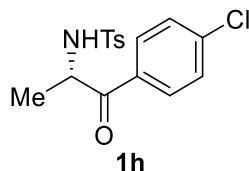

**(S)-N-(1-(4-Chlorophenyl)-1-oxopropan-2-yl)-4-methylbenzenesulfonamide**

**(1h)** was prepared according to the General Procedure A.

$^1\text{H}$  NMR (400 MHz,  $\text{CDCl}_3$ )  $\delta$  7.73 – 7.67 (m, 4H), 7.41 – 7.38 (m, 2H), 7.16 (d,  $J$  = 8.0 Hz, 2H), 5.82 (d,  $J$  = 8.2 Hz, 1H), 4.93 – 4.86 (m, 1H), 2.31 (s, 3H), 1.35 (d,  $J$  = 7.1 Hz, 3H).

$^{13}\text{C}$  NMR (100 MHz,  $\text{CDCl}_3$ )  $\delta$  197.1, 143.7, 140.7, 137.1, 131.8, 129.9, 129.8, 129.3, 127.1, 53.3, 21.5, 20.9.

IR (neat,  $\text{cm}^{-1}$ ): 3447, 2981, 1687, 1636, 1592.

HRMS (CI) calculated for  $\text{C}_{16}\text{H}_{17}\text{ClNO}_3\text{S}$  [ $\text{M}+\text{H}^+$ ]: 338.0618, found: 338.0586.

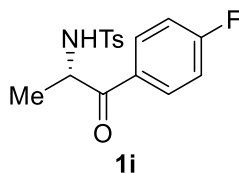

**(S)-N-(1-(4-Fluorophenyl)-1-oxopropan-2-yl)-4-methylbenzenesulfonamide**

**(1i)** was prepared according to the General Procedure A.

$^1\text{H}$  NMR (400 MHz,  $\text{CDCl}_3$ )  $\delta$  7.88 – 7.75 (m, 2H), 7.68 (d,  $J$  = 8.3 Hz, 2H), 7.16 (d,  $J$  = 8.0 Hz, 2H), 7.14 – 7.07 (m, 2H), 5.81 (d,  $J$  = 8.2 Hz, 1H), 4.96 – 4.81 (m, 1H), 2.32 (s, 3H), 1.37 (d,  $J$  = 7.2 Hz, 3H).

$^{13}\text{C}$  NMR (100 MHz,  $\text{CDCl}_3$ )  $\delta$  196.7, 167.5, 165.0, 143.7, 137.1, 131.4 (d,  $J$  = 9.5 Hz), 129.8, 127.1, 116.3 (d,  $J$  = 21.7 Hz), 53.3, 21.5, 21.0.

IR (neat,  $\text{cm}^{-1}$ ): 3282, 2983, 1687, 1598, 1163.

HRMS (CI) calculated for  $\text{C}_{16}\text{H}_{17}\text{FNO}_3\text{S}$  [ $\text{M}+\text{H}^+$ ]: 322.0913, found: 322.0930.

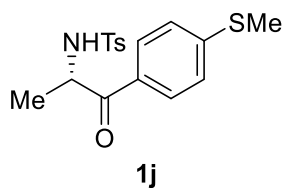

**(S)-4-Methyl-N-(1-(4-(methylthio)phenyl)-1-oxopropan-2-yl)benzenesulfonamide (1j)** was prepared according to the General Procedure A.

$^1\text{H NMR}$  (400 MHz,  $\text{CDCl}_3$ )  $\delta$  7.67 (d,  $J = 8.2$  Hz, 4H), 7.22 (d,  $J = 8.2$  Hz, 2H), 7.16 (d,  $J = 8.0$  Hz, 2H), 5.81 (d,  $J = 8.0$  Hz, 1H), 4.94 – 4.79 (m, 1H), 2.51 (s, 3H), 2.31 (s, 3H), 1.38 (d,  $J = 7.1$  Hz, 3H).

$^{13}\text{C NMR}$  (100 MHz,  $\text{CDCl}_3$ )  $\delta$  197.0, 147.8, 143.6, 137.2, 129.8, 129.4, 128.9, 127.1, 125.0, 53.2, 21.5, 21.4, 14.7.

**IR** (neat,  $\text{cm}^{-1}$ ): 3278, 1682, 1598, 1340, 1162.

**HRMS** (CI) calculated for  $\text{C}_{17}\text{H}_{20}\text{NO}_3\text{S}_2$  [ $\text{M}+\text{H}^+$ ]: 350.0885, found: 350.0888.

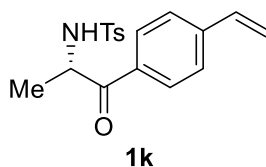

**(S)-4-Methyl-N-(1-oxo-1-(4-vinylphenyl)propan-2-yl)benzenesulfonamide (1k)** was prepared according to the General Procedure A.

$^1\text{H NMR}$  (400 MHz,  $\text{CDCl}_3$ )  $\delta$  7.73 (d,  $J = 8.1$  Hz, 2H), 7.68 (d,  $J = 8.0$  Hz, 2H), 7.45 (d,  $J = 8.1$  Hz, 2H), 7.16 (d,  $J = 8.0$  Hz, 2H), 6.80 – 6.67 (m, 1H), 5.89 (d,  $J = 17.6$  Hz, 1H), 5.80 (d,  $J = 8.0$  Hz, 1H), 5.43 (d,  $J = 10.9$  Hz, 1H), 4.97 – 4.84 (m, 1H), 2.31 (s, 3H), 1.39 (d,  $J = 7.1$  Hz, 3H).

$^{13}\text{C NMR}$  (100 MHz,  $\text{CDCl}_3$ )  $\delta$  197.5, 143.6, 143.2, 137.1, 135.7, 132.5, 129.8, 129.0, 127.1, 126.6, 117.7, 53.4, 21.5, 21.3.

**IR** (neat,  $\text{cm}^{-1}$ ): 3282, 2982, 1681, 1602, 1162.

**HRMS** (CI) calculated for  $\text{C}_{18}\text{H}_{20}\text{NO}_3\text{S}$  [ $\text{M}+\text{H}^+$ ]: 330.1164, found: 330.1173.



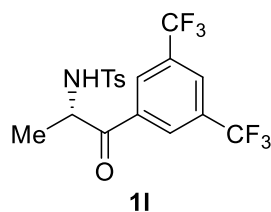

**(S)-N-(1-(3,5-Bis(trifluoromethyl)phenyl)-1-oxopropan-2-yl)-4-methyl benzenesulfonamide (11)** was prepared according to the General Procedure A.

$^1\text{H NMR}$  (400 MHz,  $\text{CDCl}_3$ )  $\delta$  8.22 (s, 2H), 8.07 (s, 1H), 7.70 (d,  $J = 7.8$  Hz, 2H), 7.19 (d,  $J = 7.9$  Hz, 2H), 5.81 (d,  $J = 8.6$  Hz, 1H), 5.05 – 4.88 (m, 1H), 2.33 (s, 3H), 1.38 (d,  $J = 7.1$  Hz, 3H).

$^{13}\text{C NMR}$  (100 MHz,  $\text{CDCl}_3$ )  $\delta$  196.3, 144.1, 137.0, 135.4, 133.2 (q,  $J = 34.0$  Hz), 129.9, 128.5, 127.2, 127.1 (q,  $J = 3.6$  Hz), 124.1 (q,  $J = 271.4$  Hz), 53.5, 21.4, 20.0.

IR (neat,  $\text{cm}^{-1}$ ): 3424, 2081, 1629, 1381, 1281.

HRMS (CI) calculated for  $\text{C}_{18}\text{H}_{15}\text{F}_6\text{NNaO}_3\text{S}$  [ $\text{M}+\text{Na}^+$ ]: 462.0575, found: 462.0581.

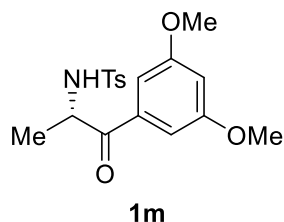

**(S)-N-(1-(3,5-Dimethoxyphenyl)-1-oxopropan-2-yl)-4-methylbenzene sulfonamide (1m)** was prepared according to the General Procedure A.

$^1\text{H NMR}$  (400 MHz,  $\text{CDCl}_3$ )  $\delta$  7.68 (d,  $J = 8.0$  Hz, 2H), 7.16 (d,  $J = 8.0$  Hz, 2H), 6.88 (d,  $J = 2.2$  Hz, 2H), 6.64 (t,  $J = 2.2$  Hz, 1H), 5.84 (d,  $J = 8.2$  Hz, 1H), 4.90 – 4.82 (m, 1H), 3.79 (s, 6H), 2.31 (s, 3H), 1.36 (d,  $J = 7.2$  Hz, 3H).

$^{13}\text{C NMR}$  (100 MHz,  $\text{CDCl}_3$ )  $\delta$  198.0, 161.1, 143.7, 137.2, 135.4, 129.8, 127.2, 106.4, 106.2, 55.7, 53.6, 21.5, 21.3.

IR (neat,  $\text{cm}^{-1}$ ): 3290, 2976, 1688, 1598, 1159.

HRMS (CI) calculated for  $\text{C}_{18}\text{H}_{21}\text{NNaO}_5\text{S}$  [ $\text{M}+\text{Na}^+$ ]: 386.1038, found: 386.1050.

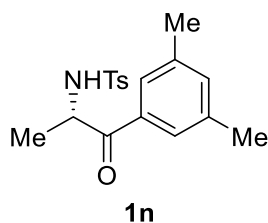

**(S)-N-(1-(3,5-Dimethylphenyl)-1-oxopropan-2-yl)-4-methylbenzene**

**sulfonamide (1n)** was prepared according to the General Procedure A.

$^1\text{H NMR}$  (400 MHz,  $\text{CDCl}_3$ )  $\delta$  7.69 (d,  $J = 7.7$  Hz, 2H), 7.35 (s, 2H), 7.21 – 7.10 (m, 3H), 5.86 (d,  $J = 8.0$  Hz, 1H), 4.98 – 4.83 (m, 1H), 2.32 (s, 6H), 2.31 (s, 3H), 1.37 (d,  $J = 7.1$  Hz, 3H).

$^{13}\text{C NMR}$  (100 MHz,  $\text{CDCl}_3$ )  $\delta$  198.5, 143.4, 138.6, 137.2, 135.8, 133.5, 129.7, 127.0, 126.2, 53.4, 21.4, 21.3, 21.2.

**IR** (neat,  $\text{cm}^{-1}$ ): 3287, 2980, 1686, 1601, 1380.

**HRMS** (CI) calculated for  $\text{C}_{18}\text{H}_{22}\text{NO}_3\text{S}$  [ $\text{M}+\text{H}^+$ ]: 332.1320, found: 332.1341.

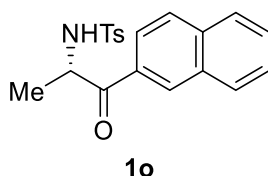

**(S)-4-Methyl-N-(1-(naphthalen-2-yl)-1-oxopropan-2-yl)benzenesulfonamide**

**(1o)** was prepared according to the General Procedure A.

$^1\text{H NMR}$  (400 MHz,  $\text{CDCl}_3$ )  $\delta$  8.30 (s, 1H), 7.94 (d,  $J = 8.0$  Hz, 1H), 7.87 (d,  $J = 8.6$  Hz, 2H), 7.80 (d,  $J = 8.6$  Hz, 1H), 7.71 (d,  $J = 8.0$  Hz, 2H), 7.67 – 7.54 (m, 2H), 7.13 (d,  $J = 8.0$  Hz, 2H), 5.89 (d,  $J = 8.2$  Hz, 1H), 5.17 – 5.04 (m, 1H), 2.25 (s, 3H), 1.47 (d,  $J = 7.1$  Hz, 3H).

$^{13}\text{C NMR}$  (100 MHz,  $\text{CDCl}_3$ )  $\delta$  198.1, 143.6, 137.20, 136.0, 132.3, 130.8, 130.5, 129.8(2C), 129.3, 128.9, 127.9, 127.3, 127.1, 123.8, 53.5, 21.5, 21.5.

**IR** (neat,  $\text{cm}^{-1}$ ): 3486, 2942, 1734, 1357, 1089.

**HRMS** (CI) calculated for  $\text{C}_{20}\text{H}_{20}\text{NO}_3\text{S}$  [ $\text{M}+\text{H}^+$ ]: 354.1164, found: 354.1147.

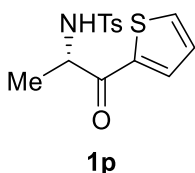

**(S)-4-Methyl-N-(1-oxo-1-(thiophen-2-yl)propan-2-yl)benzenesulfonamide**

**(1p)** was prepared according to the General Procedure A.

$^1\text{H NMR}$  (400 MHz,  $\text{CDCl}_3$ )  $\delta$  7.74 – 7.60 (m, 4H), 7.20 – 7.08 (m, 3H), 5.66 (d,  $J$  = 8.6 Hz, 1H), 4.83 – 4.69 (m, 1H), 2.32 (s, 3H), 1.45 (d,  $J$  = 7.1 Hz, 3H).

$^{13}\text{C NMR}$  (100 MHz,  $\text{CDCl}_3$ )  $\delta$  190.9, 143.7, 140.4, 137.0, 135.4, 133.1, 129.7, 128.5, 127.2, 54.3, 21.6(2C).

**IR** (neat,  $\text{cm}^{-1}$ ): 3423, 1656, 1410, 1162, 1091.

**HRMS** (CI) calculated for  $\text{C}_{14}\text{H}_{16}\text{NO}_3\text{S}_2$  [ $\text{M}+\text{H}^+$ ]: 310.0572, found: 310.0586.

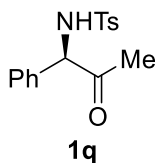

**(R)-4-Methyl-N-(2-oxo-1-phenylpropyl)benzenesulfonamide sulfonamide**

**(1q)** was prepared according to the General Procedure A.

$^1\text{H NMR}$  (400 MHz,  $\text{CDCl}_3$ )  $\delta$  7.48 (d,  $J$  = 8.0 Hz, 2H), 7.22 – 7.20 (m, 3H), 7.11 – 7.07 (m, 4H), 6.10 (s, 1H), 5.03 (d,  $J$  = 5.2 Hz, 1H), 2.33 (s, 3H), 1.98 (s, 3H).

$^{13}\text{C NMR}$  (100 MHz,  $\text{CDCl}_3$ )  $\delta$  201.9, 143.3, 137.3, 135.1, 129.4, 129.1, 128.7, 128.1, 127.0, 66.5, 26.7, 21.5.

**IR** (neat,  $\text{cm}^{-1}$ ): 3260, 3064, 1686, 1449, 1093.

**HRMS** (CI) calculated for  $\text{C}_{16}\text{H}_{17}\text{NNaO}_3\text{S}$  [ $\text{M}+\text{Na}^+$ ]: 326.0827, found: 326.0822.

The  $\alpha$ -siloxy ketones are known compounds, which were prepared according to the literature procedure.<sup>3</sup>

3. D. Gala and D. J. DiBenedetto, *Tetrahedron Lett.*, 1994, **35**, 8299.

### III. Silver-Catalyzed Synthesis of Chiral Pyrrolidinones

#### General Procedure B.

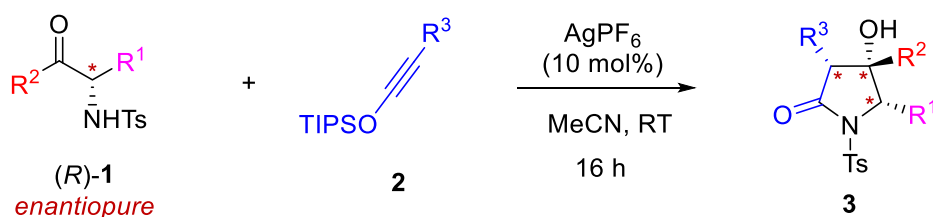

In a glovebox, an oven-dried 4-mL vial was charged with the ketone **1** (1.0 equiv), siloxy alkyne **2** (2.0 equiv) and dry acetonitrile (0.2 M). The mixture was stirred for 3 min to be homogeneous. Next, AgPF<sub>6</sub> (10 mol%) was added. The vial was capped and removed from the glovebox. The reaction mixture was stirred at room temperature for 16 h. The reaction mixture was then filtered through a short pad of silica gel, which was washed with ethyl acetate. The filtrate was concentrated under reduced pressure. The residue was purified by silica gel flash column chromatography to give the desired product as a single diastereomer.

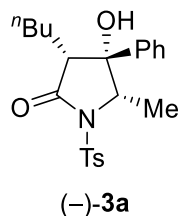

**(3R,4R,5S)-3-Butyl-4-hydroxy-5-methyl-4-phenyl-1-tosylpyrrolidin-2-one (3a)** was prepared as a colorless oil from (*R*)-4-methyl-*N*-(1-oxo-1-phenylpropan-2-yl)benzenesulfonamide (90.9 mg, 0.3 mmol) and (hex-1-yn-1-yloxy)triisopropylsilane (152.7 mg, 0.6 mmol) according to the General Procedure B (eluent: hexanes/ethyl acetate = 5:1) in 86% yield (103.6 mg, >99% ee based on HPLC analysis).

$[\alpha]_{\text{D}}^{26}$ : -40.9 ( $c = 1.0$ , CHCl<sub>3</sub>).

$^1\text{H NMR}$  (400 MHz,  $\text{CDCl}_3$ )  $\delta$  7.86 (d,  $J = 8.0$  Hz, 2H), 7.41 – 7.29 (m, 4H), 7.27 – 7.20 (m, 2H), 4.38 (q,  $J = 6.4$  Hz, 1H), 2.91 – 2.88 (m, 1H), 2.44 (s, 3H), 1.97 (s, 1H), 1.70 – 1.65 (m, 2H), 1.40 (d,  $J = 6.4$  Hz, 3H), 1.31 – 1.27 (m, 2H), 1.14 – 1.02 (m, 2H), 0.70 (t,  $J = 7.2$  Hz, 3H).

$^{13}\text{C NMR}$  (100 MHz,  $\text{CDCl}_3$ )  $\delta$  174.6, 144.9, 140.1, 137.0, 129.8, 128.9, 128.2, 128.0, 125.4, 79.1, 65.6, 54.1, 29.7, 23.1, 22.6, 21.8, 13.7, 12.3.

**IR** (neat,  $\text{cm}^{-1}$ ): 3512, 2957, 1741, 1357, 1169.

**HRMS** (CI) calculated for  $\text{C}_{22}\text{H}_{28}\text{NO}_4\text{S}$  [ $\text{M}+\text{H}^+$ ]: 402.1739, found: 402.1748.

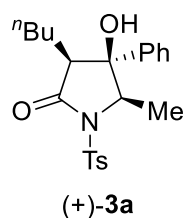

**(3S,4S,5R)-3-Butyl-4-hydroxy-5-methyl-4-phenyl-1-tosylpyrrolidin-2-one**

**(3a')** was prepared as a colorless oil from (*S*)-4-methyl-*N*-(1-oxo-1-phenylpropan-2-yl)benzenesulfonamide (606.6 mg, 2.0 mmol) and (hex-1-yn-1-yloxy)triisopropylsilane (1.02 g, 4.0 mmol) according to the General Procedure B (eluent: hexanes/ethyl acetate = 5:1) in 92% yield (739 mg).

$[\alpha]_{\text{D}}^{26}$ : +42.6 ( $c = 1.0$ ,  $\text{CHCl}_3$ ).

The spectra data is consistent with that of **3a**.

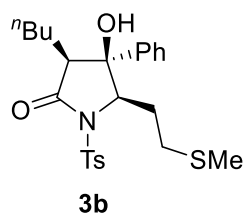

**(3S,4S,5R)-3-Butyl-4-hydroxy-5-(2-(methylthio)ethyl)-4-phenyl-1-tosylpyrrolidin-2-one (3b)** was prepared as a colorless oil from (*S*)-4-methyl-*N*-(4-(methylthio)-1-oxo-1-phenylbutan-2-yl)benzenesulfonamid

e (109.1 mg, 0.3 mmol) and (hex-1-yn-1-yloxy)triisopropylsilane (152.7 mg, 0.6 mmol) according to the General Procedure B (eluent: hexanes/ethyl acetate = 5:1) in 83% yield (115.6 mg).

$[\alpha]_{\text{D}}^{26}$ : +19.8 ( $c = 1.0$ ,  $\text{CHCl}_3$ ).

$^1\text{H NMR}$  (400 MHz,  $\text{CDCl}_3$ )  $\delta$  7.92 (d,  $J = 8.2$  Hz, 2H), 7.42 (d,  $J = 7.8$  Hz, 2H), 7.39 – 7.27 (m, 5H), 4.58 – 4.49 (m, 1H), 2.75 – 2.67 (m, 1H), 2.59 – 2.39 (m, 5H), 2.36 – 2.26 (m, 2H), 2.26 – 2.18 (m, 1H), 1.91 (s, 3H), 1.70 – 1.61 (m, 1H), 1.40 – 1.24 (m, 2H), 1.14 – 0.99 (m, 3H), 0.74 – 0.66 (m, 3H).

$^{13}\text{C NMR}$  (100 MHz,  $\text{CDCl}_3$ )  $\delta$  174.6, 145.0, 142.0, 136.4, 129.7, 128.8 (2C), 128.1, 125.1, 78.2, 68.7, 55.2, 30.7, 29.7, 27.9, 23.5, 22.5, 21.8, 15.1, 13.7.

IR (neat,  $\text{cm}^{-1}$ ): 3504, 2957, 1740, 1514, 1356.

HRMS (CI) calculated for  $\text{C}_{24}\text{H}_{32}\text{NO}_5\text{S}_2$  [ $\text{M}+\text{OH}^-$ ]: 478.1722, found: 478.1706.

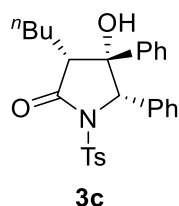

**(3R,4R,5S)-3-Butyl-4-hydroxy-4,5-diphenyl-1-tosylpyrrolidin-2-one (3c)** was prepared as a colorless oil from (*R*)-4-methyl-*N*-(2-oxo-1,2-diphenylethyl) benzenesulfonamide (109.6 mg, 0.3 mmol) and (hex-1-yn-1-yloxy) triisopropylsilane (152.7 mg, 0.6 mmol) according to the General Procedure B (eluent: hexanes/ethyl acetate = 5:1) in 76% yield (105.9 mg).

$[\alpha]_{\text{D}}^{26}$ : -20.5 ( $c = 1.0$ ,  $\text{CHCl}_3$ ).

$^1\text{H NMR}$  (400 MHz,  $\text{CDCl}_3$ )  $\delta$  7.86 (d,  $J = 7.8$  Hz, 2H), 7.41 – 7.29 (m, 8H), 7.27 – 7.20 (m, 2H), 6.90 (d,  $J = 4.9$  Hz, 2H), 5.57 (s, 1H), 3.00 (t,  $J = 6.5$  Hz, 1H), 2.49 (s, 3H), 1.86 – 1.75 (m, 1H), 1.75 (s, 1H), 1.58 – 1.45 (m, 1H), 1.33 – 1.24 (m, 1H), 1.16 – 0.98 (m, 2H), 0.97 – 0.79 (m, 1H), 0.72 (t,  $J = 7.1$  Hz, 3H).

$^{13}\text{C NMR}$  (100 MHz,  $\text{CDCl}_3$ )  $\delta$  175.3, 145.1, 140.9, 136.1, 132.8, 129.4, 129.0, 128.7(2C), 128.6, 128.1, 127.9, 125.4, 77.9, 73.0, 54.8, 29.6, 23.5, 22.5, 21.8, 13.7.

IR (neat,  $\text{cm}^{-1}$ ): 3542, 2957, 1744, 1360, 1168.

HRMS (CI) calculated for  $\text{C}_{27}\text{H}_{30}\text{NO}_4\text{S}$  [ $\text{M}+\text{H}^+$ ]: 464.1896, found: 464.1911.

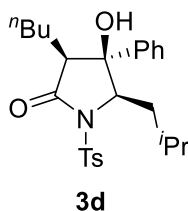

**(3*S*,4*S*,5*R*)-3-Butyl-4-hydroxy-5-isobutyl-4-phenyl-1-tosylpyrrolidin-2-one**

**(3d)** was prepared as a white solid from (*S*)-4-methyl-*N*-(4-methyl-1-oxo-1-phenylpentan-2-yl)benzenesulfonamide (103.6 mg, 0.3 mmol) and (hex-1-yn-1-yloxy)triisopropylsilane (152.7 mg, 0.6 mmol) according to the General Procedure B (eluent: hexanes/ethyl acetate = 5:1) in 73% yield (97.4 mg).

$[\alpha]_{\text{D}}^{26}$ : +23.6 ( $c = 1.0$ ,  $\text{CHCl}_3$ ).

$^1\text{H NMR}$  (400 MHz,  $\text{CDCl}_3$ )  $\delta$  7.92 (d,  $J = 8.0$  Hz, 2H), 7.43 (d,  $J = 8.0$  Hz, 2H), 7.37 – 7.28 (m, 5H), 4.44 (q,  $J = 3.2$  Hz, 1H), 2.81 – 2.78 (m, 1H), 2.43 (s, 3H), 2.10 (s, 1H), 2.06 – 1.99 (m, 1H), 1.80 – 1.74 (m, 1H), 1.70 – 1.63 (m, 1H), 1.53 – 1.46 (m, 1H), 1.38 – 1.26 (m, 2H), 1.15 – 1.00 (m, 3H), 0.70 (t,  $J = 7.2$  Hz, 3H), 0.65 (d,  $J = 6.4$  Hz, 3H), 0.58 (d,  $J = 6.4$  Hz, 3H).

$^{13}\text{C NMR}$  (100 MHz,  $\text{CDCl}_3$ )  $\delta$  174.7, 144.8, 142.0, 136.9, 129.7, 128.8, 128.0, 127.9, 125.1, 78.4, 68.4, 55.2, 37.6, 29.7, 25.5, 23.4, 23.3, 22.5, 21.8, 21.6, 13.7.

IR (neat,  $\text{cm}^{-1}$ ): 3504, 2958, 1742, 1360, 1168.

HRMS (CI) calculated for  $\text{C}_{25}\text{H}_{33}\text{NNaO}_4\text{S}$  [ $\text{M}+\text{Na}^+$ ]: 466.2028, found: 466.2004.

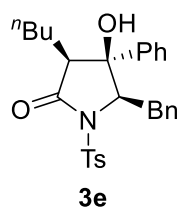

**(3*S*,4*S*,5*R*)-5-Benzyl-3-butyl-4-hydroxy-4-phenyl-1-tosylpyrrolidin-2-one (3e)**

was prepared as a white solid from (*S*)-4-methyl-*N*-(1-oxo-1,3-diphenylpropan-2-yl)benzenesulfonamide (113.9 mg, 0.3 mmol) and (hex-1-yn-1-yloxy)triisopropylsilane (152.7 mg, 0.6 mmol) according to the General Procedure B (eluent: hexanes/ethyl acetate = 5:1) in 87% yield (129.0 mg).

$[\alpha]_{\text{D}}^{26}$ : +18.4 ( $c = 1.0$ ,  $\text{CHCl}_3$ ).

$^1\text{H NMR}$  (400 MHz,  $\text{CDCl}_3$ )  $\delta$  7.97 (d,  $J = 8.4$  Hz, 2H), 7.34 (d,  $J = 8.0$  Hz, 2H), 7.13 – 7.04 (m, 3H), 7.04 – 6.93 (m, 7H), 4.87 (dd,  $J = 9.9, 3.9$  Hz, 1H), 3.81 (dd,  $J = 13.8, 3.8$  Hz, 1H), 3.06 (dd,  $J = 13.8, 9.9$  Hz, 1H), 2.74 (dd,  $J = 7.5, 5.4$  Hz, 1H), 2.46 (s, 3H), 2.24 (s, 1H), 1.70 – 1.57 (m, 1H), 1.41 – 1.23 (m, 2H), 1.14 – 1.00 (m, 3H), 0.69 (t,  $J = 7.2$  Hz, 3H).

$^{13}\text{C NMR}$  (100 MHz,  $\text{CDCl}_3$ )  $\delta$  174.4, 145.0, 142.4, 136.7, 136.6, 129.7, 129.3, 128.3, 128.2, 128.0, 127.1, 126.4, 124.4, 78.2, 70.3, 55.4, 35.1, 29.6, 23.5, 22.5, 21.8, 13.7.

IR (neat,  $\text{cm}^{-1}$ ): 3462, 2957, 1742, 1630, 1168.

HRMS (CI) calculated for  $\text{C}_{28}\text{H}_{31}\text{NO}_4\text{S}$  [ $\text{M}^+$ ]: 477.1974, found: 477.1987.

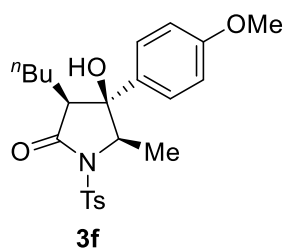

**(3*S*,4*S*,5*R*)-3-Butyl-4-hydroxy-4-(4-methoxyphenyl)-5-methyl-1-tosylpyrrolidin-2-one (3f)** was prepared as a colorless oil from (*S*)-*N*-(1-(4-methoxyphenyl)-1-oxopropan-2-yl)-4-methylbenzenesulfonamide (100.0 mg, 0.3 mmol) and (hex-1-yn-1-yloxy)triisopropylsilane (152.7 mg, 0.6 mmol) according to the General Procedure B (eluent: hexanes/ethyl acetate = 5:1) in 80% yield (103.2 mg).

$[\alpha]_{\text{D}}^{26}$ : + 28.5 ( $c = 1.0$ ,  $\text{CHCl}_3$ ).



$^1\text{H NMR}$  (400 MHz,  $\text{CDCl}_3$ )  $\delta$  7.94 (d,  $J = 8.0$  Hz, 2H), 7.40 – 7.27 (m, 4H), 6.90 (d,  $J = 8.6$  Hz, 2H), 4.33 (q,  $J = 6.2$  Hz, 1H), 3.81 (s, 3H), 2.88 – 2.77 (m, 1H), 2.43 (s, 3H), 1.98 (s, 1H), 1.69 – 1.59 (m, 1H), 1.38 (d,  $J = 6.3$  Hz, 3H), 1.34 – 1.25 (m, 2H), 1.17 – 1.01 (m, 3H), 0.72 (t,  $J = 7.2$  Hz, 3H).

$^{13}\text{C NMR}$  (100 MHz,  $\text{CDCl}_3$ )  $\delta$  174.6, 159.4, 144.8, 136.9, 131.9, 129.7, 127.9, 126.6, 114.1, 78.8, 65.6, 55.4, 53.9, 29.8, 23.0, 22.6, 21.8, 13.7, 12.2.

**IR** (neat,  $\text{cm}^{-1}$ ): 3504, 2957, 1740, 1612, 1170.

**HRMS** (CI) calculated for  $\text{C}_{23}\text{H}_{29}\text{NNaO}_5\text{S}$  [ $\text{M}+\text{Na}^+$ ]: 454.1664, found: 454.1656.

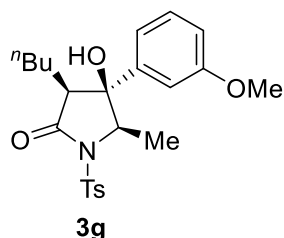

**(3*S*,4*S*,5*R*)-3-Butyl-4-hydroxy-4-(3-methoxyphenyl)-5-methyl-1-tosylpyrrolidin-2-one (3g)** was prepared as a colorless oil from (*S*)-*N*-(1-(3-methoxyphenyl)-1-oxopropan-2-yl)-4-methylbenzenesulfonamide (100.0 mg, 0.3 mmol) and (hex-1-yn-1-yloxy)triisopropylsilane (152.7 mg, 0.6 mmol) according to the General Procedure B (eluent: hexanes/ethyl acetate = 5:1) in 88% yield (113.6 mg).

$[\alpha]_{\text{D}}^{26}$ : +27.2 ( $c = 1.0$ ,  $\text{CHCl}_3$ ).

$^1\text{H NMR}$  (400 MHz,  $\text{CDCl}_3$ )  $\delta$  7.93 (d,  $J = 7.9$  Hz, 2H), 7.35 – 7.25 (m, 3H), 7.06 – 6.92 (m, 2H), 6.84 (d,  $J = 8.2$  Hz, 1H), 4.36 (q,  $J = 6.2$  Hz, 1H), 3.80 (s, 3H), 2.91 – 2.79 (m, 1H), 2.42 (s, 3H), 2.27 (s, 1H), 1.73 – 1.60 (m, 1H), 1.38 (d,  $J = 6.3$  Hz, 3H), 1.35 – 1.23 (m, 2H), 1.18 – 0.96 (m, 3H), 0.70 (t,  $J = 7.1$  Hz, 3H).

$^{13}\text{C NMR}$  (100 MHz,  $\text{CDCl}_3$ )  $\delta$  174.5, 159.9, 144.7, 142.0, 136.8, 129.8, 129.7, 127.9, 117.6, 112.9, 111.9, 78.9, 65.5, 55.4, 54.0, 29.6, 23.0, 22.5, 21.7, 13.7, 12.4.

**IR** (neat,  $\text{cm}^{-1}$ ): 3503, 2868, 1740, 1603, 1357.

**HRMS** (CI) calculated for  $\text{C}_{23}\text{H}_{29}\text{NNaO}_5\text{S}$  [ $\text{M}+\text{Na}^+$ ]: 454.1664, found: 454.1669.

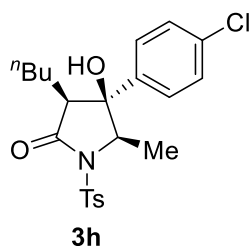

**(3*S*,4*S*,5*R*)-3-Butyl-4-(4-chlorophenyl)-4-hydroxy-5-methyl-1-tosylpyrrolidin-2-one (3h)** was prepared as a colorless oil from (*S*)-*N*-(1-(4-chlorophenyl)-1-oxopropan-2-yl)-4-methylbenzenesulfonamide (98.9 mg, 0.3 mmol) and (hex-1-yn-1-yloxy)triisopropylsilane (152.7 mg, 0.6 mmol) according to the General Procedure B (eluent: hexanes/ethyl acetate = 5:1) in 81% yield (104.3 mg).

$[\alpha]_{\text{D}}^{26}$ : +19.3 ( $c = 1.0$ ,  $\text{CHCl}_3$ ).

$^1\text{H NMR}$  (400 MHz,  $\text{CDCl}_3$ )  $\delta$  7.92 (d,  $J = 8.0$  Hz, 2H), 7.46 – 7.28 (m, 6H), 4.33 (q,  $J = 6.2$  Hz, 1H), 2.89 – 2.78 (m, 1H), 2.43 (s, 3H), 2.21 (s, 1H), 1.72 – 1.61 (m, 1H), 1.38 (d,  $J = 6.3$  Hz, 3H), 1.35 – 1.18 (m, 2H), 1.16 – 1.05 (m, 2H), 1.05 – 0.94 (m, 1H), 0.71 (t,  $J = 7.2$  Hz, 3H).

$^{13}\text{C NMR}$  (100 MHz,  $\text{CDCl}_3$ )  $\delta$  174.2, 144.9, 138.8, 136.7, 134.1, 129.7, 128.9, 127.9, 126.9, 78.7, 65.4, 54.0, 29.7, 23.0, 22.5, 21.8, 13.7, 12.3.

**IR** (neat,  $\text{cm}^{-1}$ ): 3506, 2957, 1740, 1357, 1169.

**HRMS** (CI) calculated for  $\text{C}_{22}\text{H}_{26}\text{ClNNaO}_4\text{S}$   $[\text{M}+\text{Na}^+]$ : 458.1169, found: 458.1135.

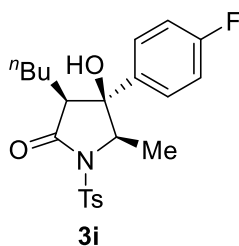

**(3*S*,4*S*,5*R*)-3-Butyl-4-(4-fluorophenyl)-4-hydroxy-5-methyl-1-tosylpyrrolidin-2-one (3i)** was prepared as colorless oil from (*S*)-*N*-(1-(4-fluorophenyl)-1-

oxopropan-2-yl)-4-methylbenzenesulfonamide (96.4 mg, 0.3 mmol) and (hex-1-yn-1-yloxy)triisopropylsilane (152.7 mg, 0.6 mmol) according to the General Procedure B (eluent: hexanes/ethyl acetate = 5:1) in 91% yield (114.8 mg).

$[\alpha]_{\text{D}}^{26}$ : +29.4 ( $c = 1.0$ ,  $\text{CHCl}_3$ ).

$^1\text{H NMR}$  (400 MHz,  $\text{CDCl}_3$ )  $\delta$  7.92 (d,  $J = 8.4$  Hz, 2H), 7.50 – 7.36 (m, 2H), 7.31 (d,  $J = 8.0$  Hz, 2H), 7.14 – 7.00 (m, 2H), 4.34 (q,  $J = 6.3$  Hz, 1H), 2.89 – 2.77 (m, 1H), 2.42 (s, 3H), 2.22 (s, 1H), 1.74 – 1.62 (m, 1H), 1.38 (d,  $J = 6.3$  Hz, 3H), 1.33 – 1.21 (m, 2H), 1.14 – 1.04 (m, 2H), 1.05 – 0.94 (m, 1H), 0.70 (t,  $J = 7.2$  Hz, 3H).

$^{13}\text{C NMR}$  (100 MHz,  $\text{CDCl}_3$ )  $\delta$  174.3, 163.6 (d,  $J = 246.1$  Hz), 144.9, 136.7, 136.0 (d,  $J = 3.1$  Hz), 129.7, 127.9, 127.3 (d,  $J = 8.2$  Hz), 115.7 (d,  $J = 21.3$  Hz), 78.7, 65.6, 54.1, 29.6, 23.0, 22.5, 21.7, 13.69, 12.3.

IR (neat,  $\text{cm}^{-1}$ ): 3503, 2957, 1740, 1512, 1168.

HRMS (CI) calculated for  $\text{C}_{22}\text{H}_{27}\text{FNO}_4\text{S}$  [ $\text{M}+\text{H}^+$ ]: 420.1645, found: 420.1655.

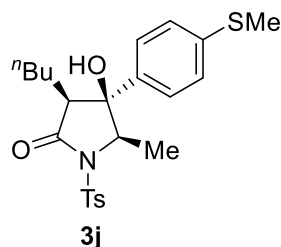

**(3S,4S,5R)-3-Butyl-4-hydroxy-5-methyl-4-(4-(methylthio)phenyl)-1-tosylpyrrolidin-2-one (3j)** was prepared as colorless oil from (S)-4-methyl-N-(1-(4-(methylthio)phenyl)-1-oxopropan-2-yl)benzenesulfonamide (104.9 mg, 0.3 mmol) and (hex-1-yn-1-yloxy)triisopropylsilane (152.7 mg, 0.6 mmol) according to the General Procedure B (eluent: hexanes/ethyl acetate = 5:1) in 94% yield (126.3 mg).

$[\alpha]_{\text{D}}^{26}$ : +20.7 ( $c = 1.0$ ,  $\text{CHCl}_3$ ).

$^1\text{H NMR}$  (400 MHz,  $\text{CDCl}_3$ )  $\delta$  7.82 (d,  $J = 7.8$  Hz, 2H), 7.28 – 7.18 (m, 4H), 7.13 (d,  $J = 8.1$  Hz, 2H), 4.22 (q,  $J = 6.2$  Hz, 1H), 2.78 – 2.66 (m, 1H), 2.37 (s, 3H), 2.32

(s, 3H), 2.15 (s, 1H), 1.61 – 1.50 (m, 1H), 1.27 (d,  $J = 6.3$  Hz, 3H), 1.24 – 1.10 (m, 2H), 1.08 – 0.87 (m, 3H), 0.61 (t,  $J = 7.2$  Hz, 3H).

$^{13}\text{C}$  NMR (100 MHz,  $\text{CDCl}_3$ )  $\delta$  174.5, 144.7, 138.7, 136.8, 136.7, 129.7, 127.9, 126.3, 125.9, 78.8, 65.5, 53.9, 29.7, 23.0, 22.5, 21.7, 15.5, 13.7, 12.3.

IR (neat,  $\text{cm}^{-1}$ ): 3463, 1740, 1632, 1356, 1169.

HRMS (CI) calculated for  $\text{C}_{23}\text{H}_{30}\text{NO}_4\text{S}_2$  [ $\text{M}+\text{H}^+$ ]: 448.1616, found: 448.1627.

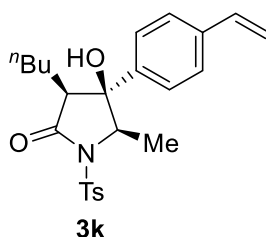

**(3S,4S,5R)-3-Butyl-4-hydroxy-5-methyl-1-tosyl-4-(4-vinylphenyl)pyrrolidin-2-one (3k)** was prepared as colorless oil from (*S*)-4-methyl-*N*-(1-oxo-1-(4-vinylphenyl)propan-2-yl)benzenesulfonamide (98.8 mg, 0.3 mmol) and (hex-1-yn-1-yloxy)triisopropylsilane (152.7 mg, 0.6 mmol) according to the General Procedure B (eluent: hexanes/ethyl acetate = 5:1) in 81% yield (104.3 mg).

$[\alpha]_{\text{D}}^{26}$ : +15.5 ( $c = 1.0$ ,  $\text{CHCl}_3$ ).

$^1\text{H}$  NMR (400 MHz,  $\text{CDCl}_3$ )  $\delta$  7.95 (d,  $J = 8.0$  Hz, 2H), 7.49 – 7.36 (m, 4H), 7.33 (d,  $J = 8.0$  Hz, 2H), 6.72 (dd,  $J = 17.6, 10.9$  Hz, 1H), 5.79 (d,  $J = 17.6$  Hz, 1H), 5.30 (d,  $J = 10.9$  Hz, 1H), 4.37 (q,  $J = 6.3$  Hz, 1H), 2.93 – 2.82 (m, 1H), 2.44 (s, 3H), 1.98 (s, 1H), 1.70 – 1.59 (m, 1H), 1.39 (d,  $J = 6.3$  Hz, 3H), 1.35 – 1.21 (m, 3H), 1.18 – 1.07 (m, 2H), 0.72 (t,  $J = 7.2$  Hz, 3H).

$^{13}\text{C}$  NMR (100 MHz,  $\text{CDCl}_3$ )  $\delta$  174.5, 144.8, 139.5, 137.5, 136.9, 136.0, 129.7, 127.9, 126.6, 125.6, 114.9, 79.0, 65.5, 54.0, 29.7, 23.1, 22.6, 21.8, 13.7, 12.3.

IR (neat,  $\text{cm}^{-1}$ ): 3501, 1740, 1630, 1288, 1169.

HRMS (CI) calculated for  $\text{C}_{24}\text{H}_{30}\text{NO}_4\text{S}$  [ $\text{M}+\text{H}^+$ ]: 428.1896, found: 428.1907.

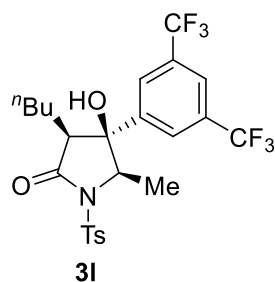

**(3S,4S,5R)-4-(3,5-Bis(trifluoromethyl)phenyl)-3-butyl-4-hydroxy-5-methyl-1-tosylpyrrolidin-2-one (3l)** was prepared as colorless oil from (*S*)-*N*-(1-(3,5-bis(trifluoromethyl)phenyl)-1-oxopropan-2-yl)-4-methylbenzene sulfonamide (131.8 mg, 0.3 mmol) and (hex-1-yn-1-yloxy)triisopropylsilane (152.7 mg, 0.6 mmol) according to the General Procedure B (eluent: hexanes/ethyl acetate = 5:1) in 83% yield (134.6 mg).

$[\alpha]_D^{26}$ : +26.0 ( $c = 1.0$ ,  $\text{CHCl}_3$ ).

$^1\text{H NMR}$  (400 MHz,  $\text{CDCl}_3$ )  $\delta$  8.00 (s, 2H), 7.95 (d,  $J = 7.9$  Hz, 2H), 7.86 (s, 1H), 7.35 (d,  $J = 8.0$  Hz, 2H), 4.42 (q,  $J = 6.2$  Hz, 1H), 2.95 (t,  $J = 6.6$  Hz, 1H), 2.63 (s, 1H), 2.45 (s, 3H), 1.79 – 1.66 (m, 1H), 1.41 (d,  $J = 6.2$  Hz, 3H), 1.37 – 1.28 (m, 1H), 1.17 – 1.03 (m, 3H), 1.01 – 0.91 (m, 1H), 0.67 (t,  $J = 6.9$  Hz, 3H).

$^{13}\text{C NMR}$  (100 MHz,  $\text{CDCl}_3$ )  $\delta$  173.5, 145.2, 143.6, 136.4, 132.7 (q,  $J = 33.3$  Hz), 129.9, 128.1, 126.1, 124.5 (q,  $J = 271.3$  Hz), 122.2, 78.7, 65.4, 54.1, 29.5, 23.0, 22.4, 21.8, 13.5, 12.5.

IR (neat,  $\text{cm}^{-1}$ ): 3442, 1741, 1625, 1280, 1170.

HRMS (CI) calculated for  $\text{C}_{24}\text{H}_{25}\text{F}_6\text{NNaO}_4\text{S}$   $[\text{M}+\text{Na}^+]$ : 560.1306, found: 560.1293.

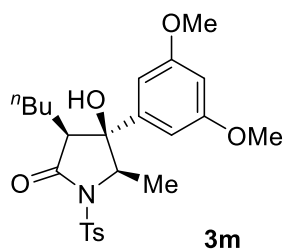

**(3S,4S,5R)-3-Butyl-4-(3,5-dimethoxyphenyl)-4-hydroxy-5-methyl-1-tosylpyrr**

**olidin-2-one (3m)** was prepared as colorless oil from (*S*)-*N*-(1-(3,5-dimethoxyphenyl)-1-oxopropan-2-yl)-4-methylbenzenesulfonamide (109.0 mg, 0.3 mmol) and (hex-1-yn-1-yloxy)triisopropylsilane (152.7 mg, 0.6 mmol) according to the General Procedure B (eluent: hexanes/ethyl acetate = 5:1) in 71% yield (98.9 mg).

$[\alpha]_{\text{D}}^{26}$ : +21.8 ( $c = 1.0$ ,  $\text{CHCl}_3$ ).

$^1\text{H NMR}$  (400 MHz,  $\text{CDCl}_3$ )  $\delta$  7.93 (d,  $J = 8.0$  Hz, 2H), 7.31 (d,  $J = 8.0$  Hz, 2H), 6.55 (s, 2H), 6.40 (s, 1H), 4.36 (q,  $J = 6.2$  Hz, 1H), 3.78 (s, 6H), 2.88 – 2.79 (m, 1H), 2.42 (s, 3H), 2.08 (s, 1H), 1.72 – 1.58 (m, 1H), 1.39 (d,  $J = 6.3$  Hz, 3H), 1.34 – 1.25 (m, 2H), 1.19 – 1.02 (m, 3H), 0.72 (t,  $J = 7.1$  Hz, 3H).

$^{13}\text{C NMR}$  (100 MHz,  $\text{CDCl}_3$ )  $\delta$  174.4, 161.1, 144.7, 142.9, 136.9, 129.7, 127.9, 103.9, 99.4, 79.0, 65.4, 55.5, 54.0, 29.6, 23.0, 22.6, 21.7, 13.7, 12.4.

**IR** (neat,  $\text{cm}^{-1}$ ): 3503, 2956, 1741, 1599, 1459.

**HRMS** (CI) calculated for  $\text{C}_{24}\text{H}_{32}\text{NO}_6\text{S}$   $[\text{M}+\text{H}^+]$ : 462.1950, found: 462.1977.

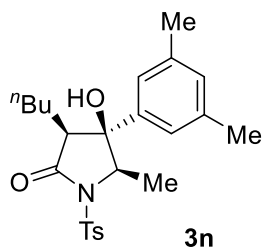

**(3*S*,4*S*,5*R*)-3-Butyl-4-(3,5-dimethylphenyl)-4-hydroxy-5-methyl-1-tosylpyrrolidin-2-one (3n)** was prepared as colorless oil from (*S*)-*N*-(1-(3,5-dimethylphenyl)-1-oxopropan-2-yl)-4-methylbenzenesulfonamide (99.5 mg, 0.3 mmol) and (hex-1-yn-1-yloxy)triisopropylsilane (152.7 mg, 0.6 mmol) according to the General Procedure B (eluent: hexanes/ethyl acetate = 5:1) in 67% yield (86.9 mg).

$[\alpha]_{\text{D}}^{26}$ : +24.8 ( $c = 1.0$ ,  $\text{CHCl}_3$ ).

$^1\text{H NMR}$  (400 MHz,  $\text{CDCl}_3$ )  $\delta$  7.95 (d,  $J = 8.0$  Hz, 2H), 7.32 (d,  $J = 8.0$  Hz, 2H), 7.01 (s, 2H), 6.95 (s, 1H), 4.39 (q,  $J = 6.2$  Hz, 1H), 2.92 – 2.79 (m, 1H), 2.43 (s,

3H), 2.32 (s, 6H), 1.95 (s, 1H), 1.76 – 1.60 (m, 1H), 1.39 (d,  $J = 6.3$  Hz, 3H), 1.36 – 1.22 (m, 2H), 1.20 – 1.02 (m, 3H), 0.73 (t,  $J = 7.1$  Hz, 3H).

$^{13}\text{C}$  NMR (100 MHz,  $\text{CDCl}_3$ )  $\delta$  174.7, 144.7, 140.1, 138.4, 137.0, 129.8, 129.7, 127.9, 123.1, 79.0, 65.6, 54.0, 29.7, 23.1, 22.6, 21.7, 21.6, 13.7, 12.4.

IR (neat,  $\text{cm}^{-1}$ ): 3502, 1740, 1602, 1357, 1169.

HRMS (CI) calculated for  $\text{C}_{24}\text{H}_{32}\text{NO}_4\text{S}$  [ $\text{M}+\text{H}^+$ ]: 430.2052, found: 430.2057.

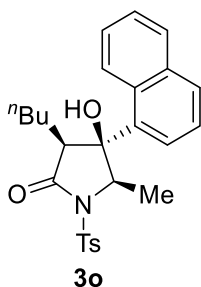

**(3S,4S,5R)-3-Butyl-4-hydroxy-5-methyl-4-(naphthalen-1-yl)-1-tosylpyrrolidin-2-one (3o)** was prepared as colorless oil from (*S*)-4-methyl-*N*-(1-(naphthalen-2-yl)-1-oxopropan-2-yl)benzenesulfonamide (106 mg, 0.3 mmol) and (hex-1-yn-1-yloxy)triisopropylsilane (152.7 mg, 0.6 mmol) according to the General Procedure B (eluent: hexanes/ethyl acetate = 5:1) in 86% yield (116.9 mg).

$[\alpha]_{\text{D}}^{26}$ : +5.6 ( $c = 1.0$ ,  $\text{CHCl}_3$ ).

$^1\text{H}$  NMR (400 MHz,  $\text{CDCl}_3$ )  $\delta$  8.02 – 7.90 (m, 3H), 7.88 – 7.78 (m, 3H), 7.55 – 7.49 (m, 2H), 7.49 – 7.45 (m, 1H), 7.30 (d,  $J = 8.2$  Hz, 2H), 4.51 (q,  $J = 6.3$  Hz, 1H), 3.05 – 2.95 (m, 1H), 2.70 (s, 1H), 2.42 (s, 3H), 1.77 – 1.66 (m, 1H), 1.42 (d,  $J = 6.0$  Hz, 3H), 1.40 – 1.23 (m, 2H), 1.16 – 0.98 (m, 3H), 0.66 (t,  $J = 7.2$  Hz, 3H).

$^{13}\text{C}$  NMR (100 MHz,  $\text{CDCl}_3$ )  $\delta$  174.6, 144.8, 137.6, 136.8, 133.0, 132.8, 129.6, 128.7, 128.2, 127.9, 127.6, 126.7, 126.6, 125.1, 122.8, 79.0, 65.4, 54.0, 29.7, 23.2, 22.6, 21.7, 13.6, 12.6.

IR (neat,  $\text{cm}^{-1}$ ): 3500, 1740, 1356, 1169, 1089.

HRMS (CI) calculated for  $\text{C}_{26}\text{H}_{30}\text{NO}_4\text{S}$  [ $\text{M}+\text{H}^+$ ]: 452.1896, found: 452.1911.

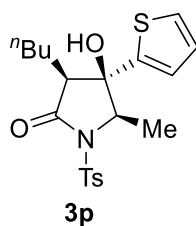

**(3*S*,4*R*,5*R*)-3-Butyl-4-hydroxy-5-methyl-4-(thiophen-2-yl)-1-tosylpyrrolidin-2-one (3p)** was prepared as a colorless oil from (*S*)-4-methyl-*N*-(1-oxo-1-(thiophen-2-yl)propan-2-yl)benzenesulfonamide (92.8 mg, 0.3 mmol) and (hex-1-yn-1-yloxy)triisopropylsilane (152.7 mg, 0.6 mmol) according to the General Procedure B (eluent: hexanes/ethyl acetate = 5:1) in 90% yield (110.4 mg).

$[\alpha]_{\text{D}}^{26}$ : +39.5 ( $c = 1.0$ ,  $\text{CHCl}_3$ ).

$^1\text{H NMR}$  (400 MHz,  $\text{CDCl}_3$ )  $\delta$  7.91 (d,  $J = 8.4$  Hz, 2H), 7.31 – 7.27 (m, 3H), 7.00 – 6.98 (m, 2H), 4.37 (q,  $J = 6.3$  Hz, 1H), 2.76 – 2.73 (m, 1H), 2.42 (s, 4H), 1.74 – 1.65 (m, 1H), 1.50 (d,  $J = 6.4$  Hz, 3H), 1.46 – 1.41 (m, 2H), 1.21 – 1.14 (m, 3H), 0.76 (t,  $J = 7.0$  Hz, 3H).

$^{13}\text{C NMR}$  (100 MHz,  $\text{CDCl}_3$ )  $\delta$  173.8, 145.3, 144.9, 136.7, 129.7, 127.9, 127.6, 125.7, 124.5, 78.1, 65.9, 55.2, 29.8, 23.1, 22.6, 21.8, 13.8, 12.6.

**IR** (neat,  $\text{cm}^{-1}$ ): 3482, 1741, 1631, 1357, 1170.

**HRMS** (CI) calculated for  $\text{C}_{20}\text{H}_{26}\text{NO}_4\text{S}_2$   $[\text{M}+\text{H}^+]$ : 408.1303, found: 408.1314.

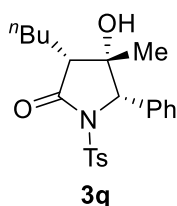

**(3*R*,4*R*,5*S*)-3-Butyl-4-hydroxy-4-methyl-5-phenyl-1-tosylpyrrolidin-2-one**

**(3q)** was prepared as a colorless oil from (*R*)-4-methyl-*N*-(2-oxo-1-phenylpropyl)benzenesulfonamide (91.0 mg, 0.3 mmol) and (hex-1-yn-1-yloxy)triisopropylsilane (152.7 mg, 0.6 mmol) according to the General Procedure B (eluent: hexanes/ethyl acetate = 5:1) in 80% yield (96.4



mg).

$[\alpha]_{\text{D}}^{26}$ : -30.2 ( $c = 1.0$ ,  $\text{CHCl}_3$ ).

$^1\text{H NMR}$  (400 MHz,  $\text{CDCl}_3$ )  $\delta$  7.74 (d,  $J = 8.4$  Hz, 2H), 7.42 – 7.31 (m, 3H), 7.27 (d,  $J = 7.2$  Hz, 2H), 7.21 – 7.14 (m, 2H), 5.02 (s, 1H), 2.43 (s, 3H), 2.36 (t,  $J = 6.0$  Hz, 1H), 1.78 – 1.67 (m, 1H), 1.66 – 1.55 (m, 2H), 1.49 – 1.28 (m, 6H), 1.03 (s, 1H), 0.90 (t,  $J = 7.2$  Hz, 3H).

$^{13}\text{C NMR}$  (100 MHz,  $\text{CDCl}_3$ )  $\delta$  175.8, 145.0, 136.2, 133.8, 129.4, 128.9, 128.6, 128.6, 128.5, 74.0, 71.8, 53.4, 30.5, 25.3, 24.1, 22.9, 21.8, 13.9.

IR (neat,  $\text{cm}^{-1}$ ): 3503, 2957, 1741, 1598, 1495.

HRMS (CI) calculated for  $\text{C}_{22}\text{H}_{28}\text{NO}_4\text{S}$   $[\text{M}+\text{H}^+]$ : 402.1739, found: 402.1724.

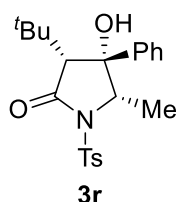

**(3R,4R,5S)-3-(tert-Butyl)-4-hydroxy-5-methyl-4-phenyl-1-tosylpyrrolidin-2-one (3r)** was prepared as a colorless oil from (*R*)-4-methyl-*N*-(1-oxo-1-phenylpropan-2-yl)benzenesulfonamide (91.0 mg, 0.3 mmol) and ((3,3-dimethylbut-1-yn-1-yl)oxy)triisopropylsilane (152.7 mg, 0.6 mmol) according to the General Procedure B (eluent: hexanes/ethyl acetate = 5:1) in 70% yield (84.9 mg).

$[\alpha]_{\text{D}}^{26}$ : -22.3 ( $c = 1.0$ ,  $\text{CHCl}_3$ ).

$^1\text{H NMR}$  (400 MHz,  $\text{CDCl}_3$ )  $\delta$  7.95 (d,  $J = 8.4$  Hz, 2H), 7.46 – 7.41 (m, 2H), 7.41 – 7.32 (m, 4H), 7.32 – 7.27 (m, 1H), 4.16 (q,  $J = 6.3$  Hz, 1H), 2.87 (s, 1H), 2.44 (s, 3H), 2.09 (s, 1H), 1.32 (d,  $J = 6.3$  Hz, 3H), 0.93 (s, 9H).

$^{13}\text{C NMR}$  (100 MHz,  $\text{CDCl}_3$ )  $\delta$  173.1, 144.8, 141.6, 136.8, 129.7, 128.6, 128.0, 127.7, 125.4, 81.0, 65.9, 61.1, 33.3, 29.7, 21.8, 11.8.

IR (neat,  $\text{cm}^{-1}$ ): 3505, 2958, 1741, 1355, 1169.

HRMS (CI) calculated for  $\text{C}_{22}\text{H}_{28}\text{NO}_4\text{S}$   $[\text{M}+\text{H}^+]$ : 402.1739, found: 402.1737.

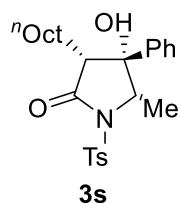

**(3R,4R,5S)-4-Hydroxy-5-methyl-3-octyl-4-phenyl-1-tosylpyrrolidin-2-one (3s)**

was prepared as a colorless oil from (*R*)-4-methyl-*N*-(1-oxo-1-phenylpropan-2-yl)benzenesulfonamide (91.0 mg, 0.3 mmol) and (dec-1-yn-1-yloxy)triisopropylsilane (186.4 mg, 0.6 mmol) according to the General Procedure B (eluent: hexanes/ethyl acetate = 5:1) in 78% yield (107.4 mg).

$[\alpha]_D^{26}$ : -38.7 ( $c = 1.0$ ,  $\text{CHCl}_3$ ).

$^1\text{H NMR}$  (400 MHz,  $\text{CDCl}_3$ )  $\delta$  7.94 (d,  $J = 8.4$  Hz, 2H), 7.45 – 7.37 (m, 4H), 7.34 – 7.31 (m, 3H), 4.39 (q,  $J = 6.3$  Hz, 1H), 2.90 – 2.87 (m, 1H), 2.43 (s, 3H), 2.15 (brs, 1H), 1.69 – 1.65 (m, 1H), 1.39 (d,  $J = 6.3$  Hz, 3H), 1.34 – 1.18 (m, 4H), 1.15 – 1.05 (m, 9H), 0.83 (t,  $J = 7.0$  Hz, 3H).

$^{13}\text{C NMR}$  (100 MHz,  $\text{CDCl}_3$ )  $\delta$  174.6, 144.8, 140.1, 136.9, 129.7, 128.8, 128.1, 127.9, 125.4, 79.0, 65.6, 54.1, 31.8, 29.4, 29.2 (2C), 27.5, 23.3, 22.7, 21.8, 14.1, 12.3.

**IR** (neat,  $\text{cm}^{-1}$ ): 3449, 2855, 1740, 1630, 1169.

**HRMS** (CI) calculated for  $\text{C}_{26}\text{H}_{36}\text{NO}_4\text{S}$  [ $\text{M}+\text{H}^+$ ]: 458.2365, found: 458.2343.

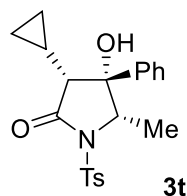

**(3R,4R,5S)-3-Cyclopropyl-4-hydroxy-5-methyl-4-phenyl-1-tosylpyrrolidin-2-one (3t)**

was prepared as a colorless oil from (*R*)-4-methyl-*N*-(1-oxo-1-phenylpropan-2-yl)benzenesulfonamide (30.3 mg, 0.1 mmol) and ((cyclopropylethynyl)oxy)triisopropylsilane (47.6 mg, 0.2 mmol) according to the General Procedure B (eluent: hexanes/ethyl acetate = 5:1) in 78% yield

(30.1 mg).

$[\alpha]_{\text{D}}^{26}$ : -41.8 ( $c = 1.0$ ,  $\text{CHCl}_3$ ).

$^1\text{H NMR}$  (400 MHz,  $\text{CDCl}_3$ )  $\delta$  7.95 (d,  $J = 8.3$  Hz, 2H), 7.44 – 7.28 (m, 7H), 4.39 (q,  $J = 6.3$  Hz, 1H), 2.44 (s, 3H), 2.42 – 2.34 (m, 2H), 1.44 (d,  $J = 6.3$  Hz, 3H), 0.85 – 0.74 (m, 1H), 0.71 – 0.58 (m, 1H), 0.41 – 0.29 (m, 1H), 0.29 – 0.16 (m, 1H), -0.13 – -0.23 (m, 1H).

$^{13}\text{C NMR}$  (100 MHz,  $\text{CDCl}_3$ )  $\delta$  173.2, 144.8, 141.0, 136.8, 129.7, 128.8, 128.1, 128.0, 125.2, 78.8, 65.2, 58.6, 21.8, 12.8, 5.1, 3.6, 1.2.

IR (neat,  $\text{cm}^{-1}$ ): 3501, 3011, 1740, 1356, 1169.

HRMS (CI) calculated for  $\text{C}_{21}\text{H}_{24}\text{NO}_4\text{S}$   $[\text{M}+\text{H}^+]$ : 386.1426, found: 386.1418.

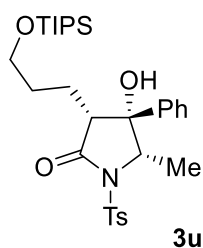

**(3R,4R,5S)-4-Hydroxy-5-methyl-4-phenyl-1-tosyl-3-(3-((triisopropylsilyl)oxy)propyl)pyrrolidin-2-one (3u)** was prepared as a colorless oil from (*R*)-4-methyl- *N*-(1-oxo-1-phenylpropan-2-yl)benzenesulfonamide (30.3 mg, 0.1 mmol) and 3,3,11,11-tetraisopropyl-2,12-dimethyl-4,10-dioxa-3,11-disilatridec-5-yne (80 mg, 0.2 mmol) according to the General Procedure B (eluent: hexanes/ethyl acetate = 5:1) in 77% yield (43.2 mg).

$[\alpha]_{\text{D}}^{26}$ : -31.0 ( $c = 1.0$ ,  $\text{CHCl}_3$ ).

$^1\text{H NMR}$  (400 MHz,  $\text{CDCl}_3$ )  $\delta$  7.95 (d,  $J = 8.3$  Hz, 2H), 7.43 (d,  $J = 7.4$  Hz, 2H), 7.40 – 7.28 (m, 5H), 4.36 (q,  $J = 6.3$  Hz, 1H), 3.47 (t,  $J = 5.7$  Hz, 2H), 2.97 (t,  $J = 6.5$  Hz, 1H), 2.44 (s, 3H), 2.35 (s, 1H), 1.86 – 1.72 (m, 1H), 1.62 – 1.50 (m, 2H), 1.41 (d,  $J = 6.3$  Hz, 3H), 1.34 – 1.21 (m, 1H), 1.01 – 0.88 (m, 21H).

$^{13}\text{C NMR}$  (100 MHz,  $\text{CDCl}_3$ )  $\delta$  174.4, 144.8, 140.7, 136.9, 129.7, 128.8, 128.1, 128.0, 125.3, 78.8, 65.7, 62.8, 53.9, 30.3, 21.8, 19.9, 18.0, 12.4, 12.0.

**IR** (neat,  $\text{cm}^{-1}$ ): 3499, 2943, 1742, 1359, 1170.

**HRMS** (CI) calculated for  $\text{C}_{30}\text{H}_{45}\text{NNaO}_5\text{SSi}$   $[\text{M}+\text{Na}^+]$ : 582.2685, found:  
582.2703.

#### IV. $\text{BF}_3 \cdot \text{OEt}_2$ -Promoted Synthesis of $\gamma$ -Butenolides

##### General Procedure C.

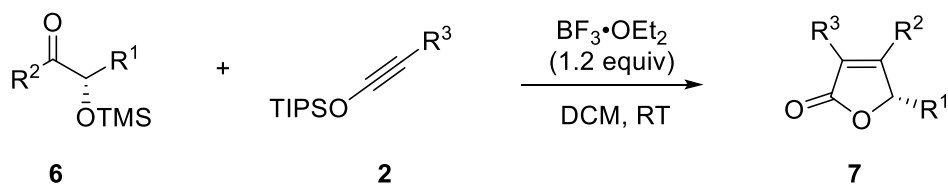

In a glovebox, an oven-dried 4-mL vial was charged with the ketone **4** (1.0 equiv), the siloxy alkyne **2** (1.5 equiv) and dry dichloromethane (0.1 M). Next,  $\text{BF}_3 \cdot \text{OEt}_2$  (1.2 equiv) was added. The vial was capped and removed from the glovebox. The reaction mixture was stirred at room temperature for 12 h. The reaction mixture was immediately loaded to the silica gel and purified by flash column chromatography.

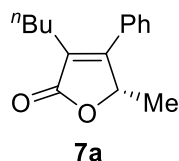

**(S)-3-Butyl-5-methyl-4-phenylfuran-2(5H)-one (7a)** was prepared as a colorless oil from *(S)*-1-phenyl-2-((trimethylsilyl)oxy)propan-1-one (22.2 mg, 0.1 mmol) and (hex-1-yn-1-yloxy)triisopropylsilane (38.2 mg, 0.15 mmol) according to the General Procedure C (eluent: hexanes/ethyl acetate = 10:1) in 97% yield (22.3 mg, 98% ee based on HPLC analysis).

$[\alpha]_{\text{D}}^{26}$ : +192.8 ( $c = 1.0$ ,  $\text{CHCl}_3$ ).

$^1\text{H NMR}$  (400 MHz,  $\text{CDCl}_3$ )  $\delta$  7.50 – 7.42 (m, 3H), 7.32 – 7.30 (m, 2H), 5.36 (q,  $J = 6.8$  Hz, 1H), 2.47 – 2.34 (m, 2H), 1.61 – 1.48 (m, 2H), 1.38 – 1.33 (m, 5H), 0.88 (t,  $J = 7.2$  Hz, 3H).

$^{13}\text{C NMR}$  (100 MHz,  $\text{CDCl}_3$ )  $\delta$  174.1, 161.1, 131.8, 129.8, 129.2, 128.0, 127.7, 78.3, 30.3, 24.1, 22.8, 19.3, 13.9.

IR (neat,  $\text{cm}^{-1}$ ): 3478, 2954, 1750, 1650, 1453.

HRMS (CI) calculated for  $\text{C}_{15}\text{H}_{18}\text{O}_2$  [ $\text{M}^+$ ]: 230.1307, found: 230.1306.

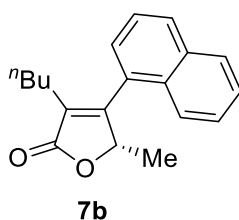

**(S)-3-Butyl-5-methyl-4-(naphthalen-2-yl)furan-2(5H)-one (7b)** was prepared as a colorless oil from (S)-1-(naphthalen-2-yl)-2-((trimethylsilyl)oxy)propan-1-one (27.2 mg, 0.2 mmol) and (hex-1-yn-1-yloxy)triisopropylsilane (38.2 mg, 0.3 mmol) according to the General Procedure C (eluent: hexanes/ethyl acetate = 10:1) in 80% yield (22.4 mg).

$[\alpha]_{\text{D}}^{26}$ : +124.4 ( $c = 1.0$ ,  $\text{CHCl}_3$ ).

$^1\text{H NMR}$  (400 MHz,  $\text{CDCl}_3$ )  $\delta$  7.96 – 7.89 (m, 3H), 7.79 (s, 1H), 7.58 – 7.57 (m, 2H), 7.43 – 7.40 (m, 1H), 5.50 (q,  $J = 6.8$  Hz, 1H), 2.52 – 2.49 (m, 2H), 1.67 – 1.56 (m, 2H), 1.39 – 1.34 (m, 5H), 0.89 (t,  $J = 7.2$  Hz, 3H).

$^{13}\text{C NMR}$  (100 MHz,  $\text{CDCl}_3$ )  $\delta$  174.1, 161.1, 133.6, 133.2, 129.2, 129.0, 128.5, 128.2, 128.0, 127.6, 127.5, 127.1, 124.8, 78.4, 30.4, 24.2, 22.8, 19.4, 17.8, 13.9.

IR (neat,  $\text{cm}^{-1}$ ): 3481, 2956, 2865, 1749, 1504.

HRMS (CI) calculated for  $\text{C}_{19}\text{H}_{20}\text{O}_2$   $[\text{M}^+]$ : 280.1463, found: 280.1455.

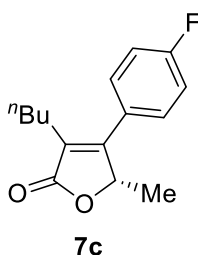

**(S)-3-Butyl-4-(4-fluorophenyl)-5-methylfuran-2(5H)-one (7c)** was prepared as a colorless oil from (S)-1-(4-fluorophenyl)-2-((trimethylsilyl)oxy)propan-1-one (48.0 mg, 0.2 mmol) and (hex-1-yn-1-yloxy)triisopropylsilane (76.4 mg, 0.3 mmol) according to the General Procedure C (eluent: hexanes/ethyl acetate = 10:1) in 95% yield (47.2 mg).

$[\alpha]_{\text{D}}^{26}$ : +196.3 ( $c = 1.0$ ,  $\text{CHCl}_3$ ).

$^1\text{H NMR}$  (400 MHz,  $\text{CDCl}_3$ )  $\delta$  7.32 – 7.28 (m, 2H), 7.19 – 7.15 (m, 2H), 5.32 (q,  $J$  = 6.8 Hz, 1H), 2.45 – 2.32 (m, 2H), 1.61 – 1.44 (m, 2H), 1.37 – 1.27 (m, 5H), 0.88 (t,  $J$  = 7.2 Hz, 3H).

$^{13}\text{C NMR}$  (100 MHz,  $\text{CDCl}_3$ )  $\delta$  173.9, 164.6 (d,  $J$  = 249.4 Hz), 159.9, 129.7 (d,  $J$  = 8.2 Hz), 128.1, 127.9 (d,  $J$  = 3.5 Hz), 116.5 (d,  $J$  = 21.8 Hz), 78.2, 30.3, 24.1, 22.8, 19.2, 13.8.

**IR** (neat,  $\text{cm}^{-1}$ ): 3474, 2956, 1751, 1605, 1455.

**HRMS** (CI) calculated for  $\text{C}_{15}\text{H}_{17}\text{O}_2$  [ $\text{M}^+$ ]: 248.1213, found: 248.1205.

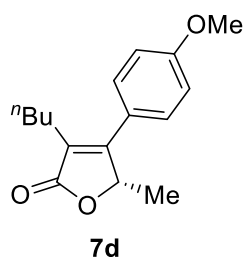

**(S)-3-Butyl-4-(4-methoxyphenyl)-5-methylfuran-2(5H)-one (7d)** was prepared as a colorless oil from (S)-1-(4-methoxyphenyl)-2-((trimethylsilyl)oxy)propan-1-one (50.5 mg, 0.2 mmol) and (hex-1-yn-1-yloxy)triisopropyl silane (76.4 mg, 0.3 mmol) according to the General Procedure C (eluent: hexanes/ethyl acetate = 10:1) in 84% yield (43.8 mg).

$[\alpha]_{\text{D}}^{26}$ : +246.4 ( $c$  = 1.0,  $\text{CHCl}_3$ ).

$^1\text{H NMR}$  (400 MHz,  $\text{CDCl}_3$ )  $\delta$  7.28 (d,  $J$  = 8.8 Hz, 2H), 7.00 (d,  $J$  = 8.8 Hz, 2H), 5.38 (q,  $J$  = 6.8 Hz, 1H), 3.87 (s, 3H), 2.50 – 2.37 (m, 2H), 1.66 – 1.47 (m, 2H), 1.40 – 1.34 (m, 5H), 0.90 (t,  $J$  = 7.2 Hz, 3H).

$^{13}\text{C NMR}$  (100 MHz,  $\text{CDCl}_3$ )  $\delta$  174.4, 160.7, 160.5, 129.2, 126.3, 124.0, 114.6, 78.1, 55.5, 30.3, 24.2, 22.9, 19.5, 13.9.

**IR** (neat,  $\text{cm}^{-1}$ ): 3480, 2955, 2865, 1748, 1607.

**HRMS** (CI) calculated for  $\text{C}_{16}\text{H}_{20}\text{O}_2$  [ $\text{M}^+$ ]: 260.1412, found: 260.1416.

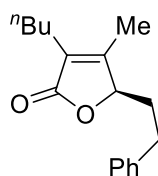

**7e**

**(R)-3-Butyl-4-methyl-5-phenethylfuran-2(5H)-one (7e)** was prepared as a colorless oil from (*R*)-5-phenyl-3-((trimethylsilyl)oxy)pentan-2-one (50.1 mg, 0.2 mmol) and (hex-1-yn-1-yloxy)triisopropylsilane (76.4 mg, 0.3 mmol) according to the General Procedure C (eluent: hexanes/ethyl acetate = 10:1) in 77% yield (39.8 mg).

$[\alpha]_{\text{D}}^{26}$ : -10.8 ( $c = 1.0$ ,  $\text{CHCl}_3$ ).

$^1\text{H NMR}$  (400 MHz,  $\text{CDCl}_3$ )  $\delta$  7.31 – 7.28 (m, 2H), 7.21 – 7.19(m, 3H), 4.72 (d,  $J = 8.4$  Hz, 1H), 2.82 – 2.69 (m, 2H), 2.26 – 2.17 (m, 2H), 2.16 – 2.13 (m, 1H), 1.91 (s, 3H), 1.77 – 1.67 (m, 1H), 1.51 – 1.43 (m, 2H), 1.36 – 1.26 (m, 2H), 0.91 (t,  $J = 7.2$  Hz, 3H).

$^{13}\text{C NMR}$  (100 MHz,  $\text{CDCl}_3$ )  $\delta$  174.4, 159.3, 140.9, 128.7 (2C), 128.0, 126.3, 82.1, 34.5, 31.1, 30.2, 23.3, 22.6, 13.9, 12.0.

**IR** (neat,  $\text{cm}^{-1}$ ): 3481, 2930, 2864, 1750, 1497.

**HRMS** (CI) calculated for  $\text{C}_{17}\text{H}_{22}\text{O}_2$  [ $\text{M}^+$ ]: 258.1620, found: 258.1622.

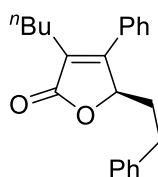

**7f**

**(R)-3-Butyl-5-phenethyl-5-phenethylfuran-2(5H)-one (7f)** was prepared as a colorless oil from (*R*)-1,4-diphenyl-2-((trimethylsilyl)oxy)butan-1-one (62.5 mg, 0.2 mmol) and (hex-1-yn-1-yloxy)triisopropylsilane (76.4 mg, 0.3 mmol) according to the General Procedure C (eluent: hexanes/ethyl acetate = 10:1) in 92% yield (59.0 mg).

$[\alpha]_{\text{D}}^{26}$ : -147.8 ( $c = 1.0$ ,  $\text{CHCl}_3$ ).



$^1\text{H NMR}$  (400 MHz,  $\text{CDCl}_3$ )  $\delta$  7.47 – 7.44 (m, 3H), 7.24 – 7.22 (m, 4H), 7.18 – 7.15 (m, 1H), 7.10 – 7.08 (m, 2H), 5.28 (d,  $J = 7.2$  Hz, 1H), 2.80 – 2.67 (m, 2H), 2.48 – 2.36 (m, 2H), 2.10 – 2.01 (m, 1H), 1.74 – 1.47 (m, 3H), 1.39 – 1.28 (m, 2H), 0.88 (t,  $J = 7.2$  Hz, 3H).

$^{13}\text{C NMR}$  (100 MHz,  $\text{CDCl}_3$ )  $\delta$  174.2, 159.8, 140.7, 131.7, 129.8, 129.2, 128.6 (2C), 128.5, 127.6, 126.3, 80.9, 35.0, 31.0, 30.4, 24.2, 22.8, 13.9.

**IR** (neat,  $\text{cm}^{-1}$ ): 3483, 3027, 2952, 1750, 1495.

**HRMS** (CI) calculated for  $\text{C}_{22}\text{H}_{24}\text{O}_2$  [ $\text{M}^+$ ]: 320.1776, found: 320.1777.

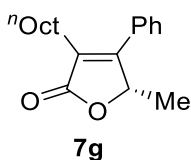

**(S)-5-Methyl-3-octyl-4-phenylfuran-2(5H)-one (7g)** was prepared as a colorless oil from (S)-1-phenyl-2-((trimethylsilyl)oxy)propan-1-one (44.5 mg, 0.2 mmol) and (dec-1-yn-1-yloxy)triisopropylsilane (93.2 mg, 0.3 mmol) according to the General Procedure C (eluent: hexanes/ethyl acetate = 10:1) in 84% yield (47.9 mg).

$[\alpha]_{\text{D}}^{26}$ : +165.1 ( $c = 1.0$ ,  $\text{CHCl}_3$ ).

$^1\text{H NMR}$  (400 MHz,  $\text{CDCl}_3$ )  $\delta$  7.49 – 7.42 (m, 3H), 7.31 – 7.29 (m, 2H), 5.36 (q,  $J = 6.8$  Hz, 1H), 2.46 – 2.33 (m, 2H), 1.62 – 1.47 (m, 2H), 1.35 (d,  $J = 6.8$  Hz, 3H), 1.30 – 1.22 (m, 10H), 0.86 (t,  $J = 7.2$  Hz, 3H).

$^{13}\text{C NMR}$  (100 MHz,  $\text{CDCl}_3$ )  $\delta$  174.1, 161.0, 131.8, 129.7, 129.2, 128.0, 127.7, 78.3, 31.9, 29.7, 29.3, 29.2, 28.2, 24.3, 22.7, 19.2, 14.2.

**IR** (neat,  $\text{cm}^{-1}$ ): 3479, 2926, 2858, 1752, 1454.

**HRMS** (CI) calculated for  $\text{C}_{19}\text{H}_{26}\text{O}_2$  [ $\text{M}^+$ ]: 286.1933, found: 286.1919.

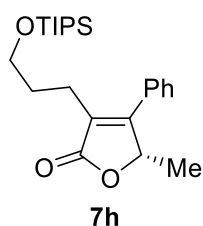

**(S)-5-Methyl-4-phenyl-3-(3-((triisopropylsilyloxy)propyl)furan-2(5H)-one**

**(7h)** was prepared as a colorless oil from (*S*)-1-phenyl-2-((trimethylsilyloxy)propan-1-one (44.5 mg, 0.2 mmol) and 3,3,11,11-tetraisopropyl-2,12-dimethyl-4,10-dioxo-3,11-disilatridec-5-yne (120 mg, 0.3 mmol) according to the General Procedure C (eluent: hexanes/ethyl acetate = 10:1) in 64% yield (49.7 mg).

$[\alpha]_{\text{D}}^{26}$ : +116.9 ( $c = 1.0$ ,  $\text{CHCl}_3$ ).

$^1\text{H NMR}$  (400 MHz,  $\text{CDCl}_3$ )  $\delta$  7.47 – 7.42 (m, 3H), 7.38 – 7.36 (m, 2H), 5.39 (q,  $J = 6.8$  Hz, 1H), 3.78 – 3.66 (m, 2H), 2.65 – 2.48 (m, 2H), 1.91 – 1.75 (m, 2H), 1.36 (d,  $J = 6.8$  Hz, 3H), 1.07 – 1.02 (m, 21H).

$^{13}\text{C NMR}$  (100 MHz,  $\text{CDCl}_3$ )  $\delta$  174.1, 161.0, 131.6, 129.8, 129.2, 127.8, 127.5, 78.3, 62.9, 31.4, 21.2, 19.4, 18.1, 12.1.

IR (neat,  $\text{cm}^{-1}$ ): 2942, 2864, 1752, 1457, 1102.

HRMS (CI) calculated for  $\text{C}_{23}\text{H}_{37}\text{O}_3\text{Si}$  [ $\text{M}+\text{H}^+$ ]: 389.2512, found: 389.2502.

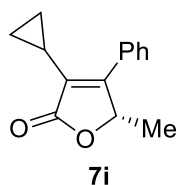

**(S)-3-Cyclopropyl-5-methyl-4-phenylfuran-2(5H)-one (7i)** was prepared as a colorless oil from (*S*)-1-phenyl-2-((trimethylsilyloxy)propan-1-one (44.5 mg, 0.2 mmol) and ((cyclopropylethynyl)oxy)triisopropylsilane (71.4 mg, 0.3mmol) according to the General Procedure C (eluent: hexanes/ethyl acetate = 10:1) in 83% yield (35.6 mg).

$[\alpha]_{\text{D}}^{26}$ : +274.8 ( $c = 1.0$ ,  $\text{CHCl}_3$ ).

$^1\text{H NMR}$  (400 MHz,  $\text{CDCl}_3$ )  $\delta$  7.49 – 7.41 (m, 5H), 5.31 (q,  $J = 6.8$  Hz, 1H), 1.75 – 1.67 (m, 1H), 1.33 (d,  $J = 6.8$  Hz, 3H), 1.26 – 1.20 (m, 1H), 1.11 – 1.06 (m, 1H), 0.94 – 0.87 (m, 1H), 0.70 – 0.63 (m, 1H).

$^{13}\text{C NMR}$  (100 MHz,  $\text{CDCl}_3$ )  $\delta$  172.2, 161.0, 131.6, 129.7, 129.0, 128.2, 127.3, 77.6, 19.2, 7.6, 6.6, 5.4.

**IR** (neat,  $\text{cm}^{-1}$ ): 2989, 2931, 1746, 1495, 1325.

**HRMS** (CI) calculated for  $\text{C}_{14}\text{H}_{14}\text{O}_2$  [ $\text{M}^+$ ]: 214.0994, found: 214.0991.

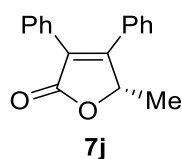

**(S)-5-Methyl-3,4-diphenylfuran-2(5H)-one (7j)** was prepared as a colorless oil from (*S*)-1-phenyl-2-((trimethylsilyl)oxy)propan-1-one (44.5 mg, 0.2 mmol) and triisopropyl((phenylethynyl)oxy)silane (82.2 mg, 0.3 mmol) according to the General Procedure C (eluent: hexanes/ethyl acetate = 10:1) in 76% yield (38.0 mg).

$[\alpha]_{\text{D}}^{26}$ : +38.0 ( $c = 1.0$ ,  $\text{CHCl}_3$ ).

$^1\text{H NMR}$  (400 MHz,  $\text{CDCl}_3$ )  $\delta$  7.41 – 7.31 (m, 8H), 7.25 – 7.23 (m, 2H), 5.53 (q,  $J = 6.8$  Hz, 1H), 1.35 (d,  $J = 6.8$  Hz, 3H).

$^{13}\text{C NMR}$  (100 MHz,  $\text{CDCl}_3$ )  $\delta$  172.4, 161.7, 131.3, 130.1, 130.0, 129.4, 129.1, 128.7, 128.6, 128.2, 126.2, 78.2, 19.2.

**IR** (neat,  $\text{cm}^{-1}$ ): 3448, 3064, 2980, 1735, 1640.

**HRMS** (CI) calculated for  $\text{C}_{17}\text{H}_{14}\text{O}_2$  [ $\text{M}^+$ ]: 250.0994, found: 250.0992.

## V. Product Transformations

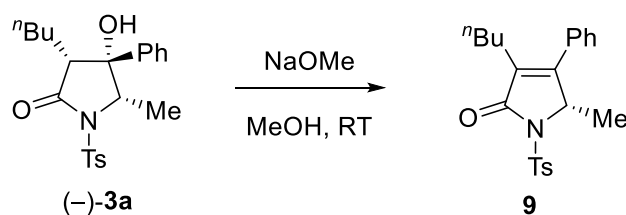

**(S)-3-Butyl-5-methyl-4-phenyl-1-tosyl-1,5-dihydro-2H-pyrrol-2-one (4).** To a solution of (-)-**3a** (0.1 mmol, 40.2 mg) in MeOH (1.0 mL) was added dropwise NaOMe (0.1 mL, 5.4 M solution in MeOH). After stirring for 2 h at room temperature, water (2 mL) was added. The mixture was extracted with DCM (3 × 10 mL). The combined organic layers were washed with brine, dried with Na<sub>2</sub>SO<sub>4</sub>, and concentrated. The crude product was purified by flash column chromatography to yield **9** (37.6 mg, 98% yield).

$[\alpha]_{\text{D}}^{26}$ : -5.2 ( $c = 1.0$ , CHCl<sub>3</sub>).

<sup>1</sup>H NMR (400 MHz, CDCl<sub>3</sub>)  $\delta$  8.02 (d,  $J = 8.4$  Hz, 2H), 7.53 – 7.38 (m, 3H), 7.34 (d,  $J = 8.1$  Hz, 2H), 7.29 – 7.26 (m, 2H), 5.11 (q,  $J = 6.5$  Hz, 1H), 2.43 (s, 3H), 2.35 – 2.20 (m, 2H), 1.55 – 1.45 (m, 1H), 1.45 – 1.33 (m, 4H), 1.30 – 1.22 (m, 2H), 0.82 (t,  $J = 7.3$  Hz, 3H).

<sup>13</sup>C NMR (100 MHz, CDCl<sub>3</sub>)  $\delta$  169.4, 157.6, 144.9, 136.6, 132.1, 132.0, 129.7, 129.1, 128.2, 128.0, 59.7, 30.4, 24.0, 22.8, 21.8, 19.7, 13.82.

IR (neat, cm<sup>-1</sup>): 3420, 2959, 1717, 1643, 1354.

HRMS (CI) calculated for C<sub>22</sub>H<sub>25</sub>NO<sub>3</sub>S [M+H<sup>+</sup>]: 384.1633, found: 384.1644.

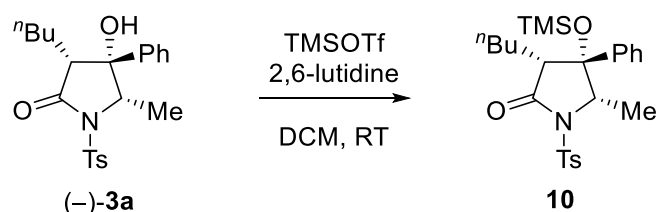

**(3R,4R,5S)-3-Butyl-5-methyl-4-phenyl-1-tosyl-4-((trimethylsilyl)oxy)**

**pyrrolidin-2-one (10).** To a solution of (-)-**3a** (0.37 mmol, 150.0 mg) and 2,6-lutidine (0.75 mmol, 87  $\mu$ L) in DCM (4.0 mL) was added dropwise

TMSOTf (0.67 mmol, 120  $\mu$ L). After stirring overnight at room temperature, water (2 mL) was added. The mixture was extracted with DCM ( $3 \times 10$  mL). The combined organic layers were washed with brine, dried with  $\text{Na}_2\text{SO}_4$ , and concentrated. The crude product was purified by flash column chromatography to yield **10** (156.7 mg, 88% yield).

$[\alpha]_{\text{D}}^{26}$ :  $-38.9$  ( $c = 1.0$ ,  $\text{CHCl}_3$ ).

$^1\text{H NMR}$  (400 MHz,  $\text{CDCl}_3$ )  $\delta$  7.72 (d,  $J = 8.4$  Hz, 2H), 7.27 – 7.26 (m, 5H), 7.20 (d,  $J = 8.4$  Hz, 2H), 4.42 (q,  $J = 6.4$  Hz, 1H), 2.84 – 2.80 (m, 1H), 2.41 (s, 3H), 1.74 – 1.66 (m, 2H), 1.57 – 1.53 (m, 4H), 1.31 – 1.23 (m, 3H), 0.84 (t,  $J = 7.2$  Hz, 3H), 0.97 (s, 9H).

$^{13}\text{C NMR}$  (100 MHz,  $\text{CDCl}_3$ )  $\delta$  174.4, 144.6, 143.2, 135.9, 129.4, 128.5, 128.0, 127.9, 126.1, 81.5, 67.4, 53.7, 30.4, 26.5, 22.7, 21.7, 16.0, 13.9, 2.2.

IR (neat,  $\text{cm}^{-1}$ ): 3442, 2958, 1739, 1362, 1170.

HRMS (CI) calculated for  $\text{C}_{25}\text{H}_{35}\text{NNaO}_4\text{SSi}$  [ $\text{M}+\text{Na}^+$ ]: 496.1954, found: 496.1943.

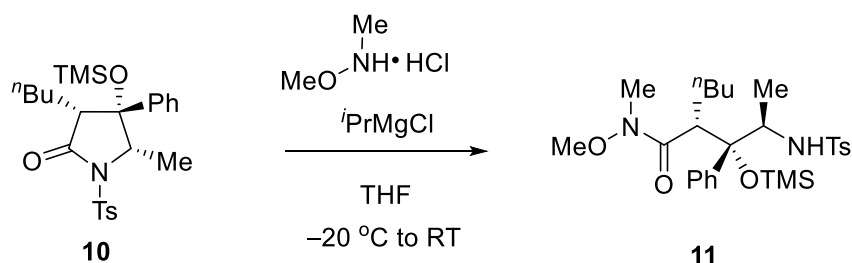

**(R)-N-Methoxy-N-methyl-2-((1S,2R)-2-((4-methylphenyl)sulfonamido)-1-phenyl-1-((trimethylsilyl)oxy)propyl)hexanamide (11)**. At  $-20$   $^\circ\text{C}$ , to a solution of **10** (0.13 mmol, 55.6 mg) and *N,O*-dimethylhydroxylamine hydrochloride (0.5 mmol, 48.8 mg) in DCM (4.0 mL) was added a solution of isopropylmagnesium chloride (1.0 mmol, 2.0 M in THF, 0.5 mL) dropwise. Then the mixture was stirred overnight at room temperature before water (2 mL) was added. Upon completion, the reaction was quenched by a saturated aqueous  $\text{NH}_4\text{Cl}$  solution. The mixture was extracted with ethyl acetate ( $3 \times 10$

mL). The combined organic layers were washed with brine (30 mL), dried with Na<sub>2</sub>SO<sub>4</sub>, and concentrated under reduced pressure. The crude product was purified by flash chromatography to afford **11** (60.6 mg, 87%).

[ $\alpha$ ]<sub>D</sub><sup>26</sup>: +21.9 (*c* = 1.0, CHCl<sub>3</sub>).

<sup>1</sup>H NMR (400 MHz, CDCl<sub>3</sub>)  $\delta$  7.80 (d, *J* = 8.4 Hz, 2H), 7.32 – 7.22 (m, 5H), 7.18 – 7.16 (m, 2H), 4.98 (d, *J* = 8.4 Hz, 1H), 4.18 – 4.10 (m, 1H), 3.80 – 3.77 (m, 4H), 3.20 (s, 3H), 2.41 (s, 3H), 1.12 – 1.05 (m, 2H), 1.00 – 0.89 (m, 7H), 0.74 (t, *J* = 7.2 Hz, 3H), 0.13 (s, 9H).

<sup>13</sup>C NMR (100 MHz, CDCl<sub>3</sub>)  $\delta$  173.9, 143.3, 139.8, 139.3, 129.8, 127.9, 127.4, 126.9(2C), 86.2, 61.5, 54.5, 47.2, 32.2, 30.2, 29.8, 23.0, 21.6, 17.8, 14.1, 3.2.

IR (neat, cm<sup>-1</sup>): 3391, 2958, 1659, 1158, 1087.

HRMS (CI) calculated for C<sub>27</sub>H<sub>42</sub>N<sub>2</sub>NaO<sub>5</sub>SSi [M+Na<sup>+</sup>]: 557.2481, found: 557.2474.

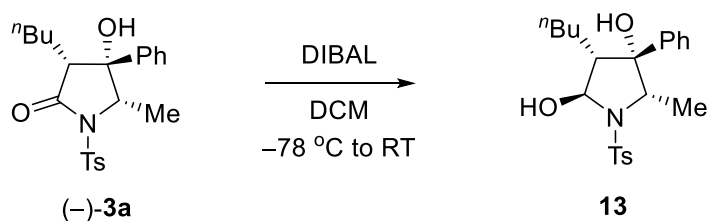

**(2S,3R,4R,5S)-3-Butyl-5-methyl-4-phenyl-1-tosylpyrrolidine-2,4-diol (13)**. To a solution of (-)-**3a** (0.2 mmol, 80.3 mg) in DCM (2.0 mL) was added DIBAL (0.44 mmol, 0.44 mL, 1.0 M solution in hexane) dropwise. After stirring for 2 h at -78 °C, it was allowed to warm to room temperature and stir overnight. Upon completion, the reaction was quenched by saturated aqueous NH<sub>4</sub>Cl solution. The mixture was extracted with DCM (3 × 10 mL). The combined organic layers were washed with brine, dried over Na<sub>2</sub>SO<sub>4</sub>, and concentrated. The crude product was purified by silica gel flash column chromatography to yield **13** (53.8 mg, 73% yield).

[ $\alpha$ ]<sub>D</sub><sup>26</sup>: -50.2 (*c* = 1.0, CHCl<sub>3</sub>).

$^1\text{H NMR}$  (400 MHz,  $\text{CDCl}_3$ )  $\delta$  7.81 (d,  $J = 8.0$  Hz, 2H), 7.38 (d,  $J = 8.0$  Hz, 2H), 7.32 – 7.24 (m, 3H), 7.17 (d,  $J = 8.0$  Hz, 2H), 5.61 (t,  $J = 5.2$  Hz, 1H), 3.75 (d,  $J = 4.8$  Hz, 1H), 3.61 (q,  $J = 6.4$  Hz, 1H), 3.25 (s, 1H), 2.48 (s, 3H), 1.84 – 1.81 (m, 1H), 1.70 – 1.65 (m, 1H), 1.32 – 1.24 (m, 4H), 1.18 – 1.53 (m, 2H), 1.12 – 0.99 (m, 2H), 0.77 (t,  $J = 7.2$  Hz, 3H).

$^{13}\text{C NMR}$  (100 MHz,  $\text{CDCl}_3$ )  $\delta$  144.0, 140.1, 136.1, 130.0, 128.4, 127.5, 127.3, 125.2, 85.7, 84.0, 67.7, 52.8, 29.6, 22.8, 21.9, 21.7, 14.6, 14.0.

IR (neat,  $\text{cm}^{-1}$ ): 3474, 2958, 1343, 1165, 1029.

HRMS (CI) calculated for  $\text{C}_{22}\text{H}_{28}\text{NO}_3\text{S}$  [ $\text{M-OH}^+$ ]: 386.1789, found: 386.1771.

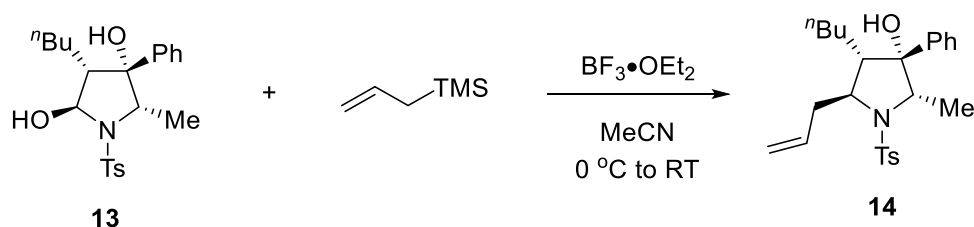

**(2S,3R,4S,5S)-5-Allyl-4-butyl-2-methyl-3-phenyl-1-tosylpyrrolidin-3-ol (14).**

At 0 °C, to a solution of **13** (0.05 mmol, 20.1 mg) and allyltrimethylsilane (0.25 mmol, 40  $\mu\text{L}$ ) in MeCN (1.0 mL) was added  $\text{BF}_3 \cdot \text{OEt}_2$  (0.1 mmol, 16  $\mu\text{L}$ ). After stirring for 30 min at 0 °C, it was warmed to room temperature and stir for 30 min. Upon completion, the reaction mixture was then filtered through a short pad of silica gel, which was washed with ethyl acetate. The filtrate was concentrated to give the product **14** (18.3 mg, 86% yield) without further purification.

$[\alpha]_{\text{D}}^{26}$ : -58.1 ( $c = 1.0$ ,  $\text{CHCl}_3$ ).

$^1\text{H NMR}$  (400 MHz,  $\text{CDCl}_3$ )  $\delta$  7.81 (d,  $J = 8.0$  Hz, 2H), 7.40 (d,  $J = 8.0$  Hz, 2H), 7.22 – 7.20 (m, 3H), 6.86 – 6.84 (m, 2H), 6.18 – 6.07 (m, 1H), 5.16 – 5.12 (m, 2H), 4.17 – 4.11 (m, 1H), 3.68 (q,  $J = 6.4$  Hz, 1H), 2.73 – 2.65 (m, 1H), 2.51 – 2.45 (m, 4H), 1.87 (s, 1H), 1.82 – 1.77 (m, 1H), 1.38 – 1.32 (m, 1H), 1.27 (d,  $J = 6.4$  Hz, 3H), 1.14 – 1.03 (m, 3H), 0.97 – 0.87 (m, 2H), 0.73 (t,  $J = 7.2$  Hz, 3H).

**<sup>13</sup>C NMR** (100 MHz, CDCl<sub>3</sub>) δ 143.9, 143.2, 136.7, 135.1, 129.8, 128.5, 128.1, 127.4, 124.8, 116.8, 84.2, 68.1, 63.4, 52.8, 36.7, 29.8, 22.8, 22.6, 21.7, 15.6, 13.9.

**IR** (neat, cm<sup>-1</sup>): 3505, 2930, 1639, 1376, 1162.

**HRMS** (CI) calculated for C<sub>25</sub>H<sub>32</sub>NO<sub>2</sub>S [M-OH<sup>+</sup>]: 410.2153, found: 410.2155.



## VI. Determination of the Product Structure

The structure and stereochemistry of product **3e** were determined by X-ray diffraction. The X-ray data have been deposited at the Cambridge Crystallographic Data Center (CCDC 1047790). The structure of other products was assumed by analogy.

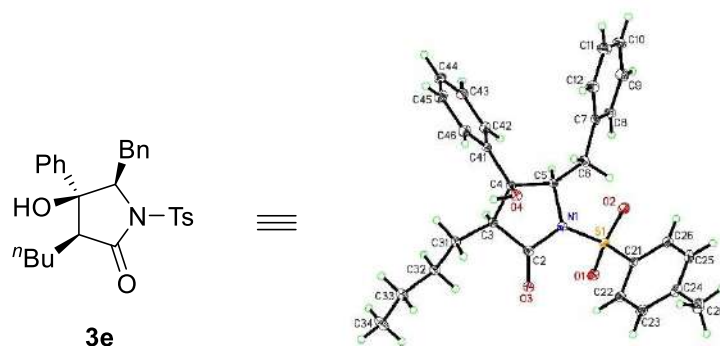

**Table S1. Crystal data and structure refinement for **3e**.**

|                                    |                                                   |
|------------------------------------|---------------------------------------------------|
| Identification code                | <b>3e</b>                                         |
| Empirical formula                  | C <sub>28</sub> H <sub>31</sub> NO <sub>4</sub> S |
| Formula weight                     | 477.60                                            |
| Temperature/K                      | 99.9(5)                                           |
| Crystal system                     | monoclinic                                        |
| Space group                        | P2 <sub>1</sub>                                   |
| a/Å                                | 11.8701(4)                                        |
| b/Å                                | 9.35538(18)                                       |
| c/Å                                | 12.2790(4)                                        |
| α/°                                | 90.00                                             |
| β/°                                | 117.558(4)                                        |
| γ/°                                | 90.00                                             |
| Volume/Å <sup>3</sup>              | 1208.86(6)                                        |
| Z                                  | 2                                                 |
| ρ <sub>calc</sub> /cm <sup>3</sup> | 1.312                                             |
| μ/mm <sup>-1</sup>                 | 1.472                                             |

|                                             |                                                               |
|---------------------------------------------|---------------------------------------------------------------|
| F(000)                                      | 508.0                                                         |
| Crystal size/mm <sup>3</sup>                | 0.25 × 0.1 × 0.03                                             |
| Radiation                                   | CuKα (λ = 1.54184)                                            |
| 2θ range for data collection/°              | 8.4 to 134.96                                                 |
| Index ranges                                | -14 ≤ h ≤ 13, -8 ≤ k ≤ 11, -14 ≤ l ≤ 14                       |
| Reflections collected                       | 6698                                                          |
| Independent reflections                     | 3391 [R <sub>int</sub> = 0.0194, R <sub>sigma</sub> = 0.0249] |
| Data/restraints/parameters                  | 3391/1/310                                                    |
| Goodness-of-fit on F <sup>2</sup>           | 1.001                                                         |
| Final R indexes [I ≥ 2σ (I)]                | R <sub>1</sub> = 0.0242, wR <sub>2</sub> = 0.0598             |
| Final R indexes [all data]                  | R <sub>1</sub> = 0.0250, wR <sub>2</sub> = 0.0604             |
| Largest diff. peak/hole / e Å <sup>-3</sup> | 0.19/-0.24                                                    |
| Flack parameter                             | 0.007(11)                                                     |

**Table S2. Fractional Atomic Coordinates (×10<sup>4</sup>) and Equivalent Isotropic Displacement Parameters (Å<sup>2</sup>×10<sup>3</sup>) for 3e. U<sub>eq</sub> is defined as 1/3 of the trace of the orthogonalised U<sub>ij</sub> tensor.**

| Atom | x           | y           | z           | U(eq)     |
|------|-------------|-------------|-------------|-----------|
| S1   | 3039.6 (3)  | 845.5 (4)   | 2187.4 (3)  | 14.54 (9) |
| O1   | 4011.7 (11) | 49.2 (13)   | 2075.0 (11) | 19.9 (3)  |
| O2   | 1845.0 (11) | 180.8 (13)  | 1882.3 (10) | 19.3 (3)  |
| O3   | 5729.4 (10) | 1731.5 (14) | 4080.1 (11) | 18.7 (3)  |
| O4   | 3979.7 (10) | 3334.7 (13) | 5586.8 (10) | 15.8 (2)  |
| N1   | 3635.2 (12) | 1334.6 (15) | 3655.5 (12) | 14.7 (3)  |
| C2   | 4950.0 (15) | 1452.6 (18) | 4422.3 (15) | 14.8 (3)  |
| C3   | 5162.3 (14) | 1199.6 (17) | 5723.3 (14) | 13.2 (3)  |
| C4   | 3923.2 (14) | 1818.0 (18) | 5653.9 (14) | 13.4 (3)  |
| C5   | 2894.9 (14) | 1308.2 (18) | 4364.6 (14) | 13.9 (3)  |
| C6   | 1686.4 (14) | 2233.3 (19) | 3803.1 (15) | 15.9 (3)  |
| C7   | 537.4 (14)  | 1553.6 (19) | 3827.0 (15) | 15.5 (3)  |

|     |              |             |             |          |
|-----|--------------|-------------|-------------|----------|
| C8  | 78.8 (16)    | 226 (2)     | 3291.3 (16) | 19.5 (4) |
| C9  | -1020.6 (17) | -343 (2)    | 3249.5 (17) | 23.5 (4) |
| C10 | -1676.7 (16) | 399 (2)     | 3756.1 (17) | 24.1 (4) |
| C11 | -1216.3 (17) | 1707 (2)    | 4311.8 (18) | 25.5 (4) |
| C12 | -122.8 (16)  | 2285 (2)    | 4334.0 (16) | 20.8 (4) |
| C20 | 2140.7 (19)  | 6533 (2)    | -415.0 (18) | 26.7 (4) |
| C21 | 2760.6 (15)  | 2457.1 (18) | 1358.3 (14) | 14.8 (3) |
| C22 | 3798.5 (15)  | 3269 (2)    | 1497.7 (15) | 16.7 (3) |
| C23 | 3578.8 (16)  | 4575.8 (19) | 901.2 (15)  | 18.7 (4) |
| C24 | 2342.6 (17)  | 5077.9 (19) | 170.2 (15)  | 20.0 (4) |
| C25 | 1324.8 (17)  | 4222 (2)    | 27.8 (16)   | 21.9 (4) |
| C26 | 1523.4 (16)  | 2908 (2)    | 624.6 (15)  | 19.5 (3) |
| C31 | 6417.1 (14)  | 1819.3 (18) | 6687.2 (15) | 15.1 (3) |
| C32 | 7543.4 (14)  | 869 (2)     | 6877.9 (14) | 16.0 (3) |
| C33 | 8820.5 (15)  | 1573 (2)    | 7686.0 (17) | 21.8 (4) |
| C34 | 9948.8 (15)  | 646 (2)     | 7863.1 (17) | 27.0 (4) |
| C41 | 3651.7 (14)  | 1334.1 (19) | 6698.1 (15) | 15.4 (3) |
| C42 | 3301.3 (16)  | -69 (2)     | 6761.8 (16) | 19.8 (4) |
| C43 | 3090.9 (17)  | -526 (2)    | 7734.4 (17) | 24.9 (4) |
| C44 | 3242.5 (17)  | 411 (2)     | 8660.5 (17) | 26.8 (4) |
| C45 | 3592.9 (17)  | 1814 (2)    | 8606.2 (17) | 26.2 (4) |
| C46 | 3791.3 (16)  | 2274 (2)    | 7629.2 (16) | 21.0 (4) |

**Table S3. Anisotropic Displacement Parameters ( $\text{\AA}^2 \times 10^3$ ) for 3e. The Anisotropic displacement factor exponent takes the form:  $-2\pi^2[h^2a^{*2}U_{11}+2hka^*b^*U_{12}+\dots]$ .**

| Atom | U <sub>11</sub> | U <sub>22</sub> | U <sub>33</sub> | U <sub>23</sub> | U <sub>13</sub> | U <sub>12</sub> |
|------|-----------------|-----------------|-----------------|-----------------|-----------------|-----------------|
| S1   | 15.82 (17)      | 14.87 (19)      | 13.18 (17)      | -0.25 (15)      | 6.92 (13)       | -1.81 (15)      |
| O1   | 23.9 (6)        | 19.3 (7)        | 19.5 (6)        | 0.7 (5)         | 12.5 (5)        | 2.0 (5)         |
| O2   | 20.4 (6)        | 20.3 (6)        | 16.3 (6)        | -1.2 (5)        | 7.6 (5)         | -6.6 (5)        |
| O3   | 14.4 (5)        | 24.4 (7)        | 19.8 (6)        | 2.5 (5)         | 9.9 (5)         | 0.1 (5)         |

|     |          |           |           |          |          |          |
|-----|----------|-----------|-----------|----------|----------|----------|
| O4  | 15.7 (5) | 12.4 (6)  | 17.9 (6)  | -0.6 (5) | 6.7 (4)  | -0.3 (4) |
| N1  | 12.3 (6) | 19.0 (7)  | 13.3 (6)  | 0.3 (5)  | 6.5 (5)  | -0.8 (5) |
| C2  | 14.0 (7) | 12.6 (8)  | 17.8 (8)  | 1.2 (6)  | 7.5 (6)  | 1.5 (6)  |
| C3  | 12.7 (7) | 14.2 (9)  | 13.2 (7)  | 0.4 (6)  | 6.5 (6)  | 0.7 (6)  |
| C4  | 12.4 (7) | 13.1 (8)  | 14.6 (7)  | 1.0 (6)  | 6.0 (6)  | 0.2 (6)  |
| C5  | 12.5 (7) | 16.5 (8)  | 14.0 (7)  | 1.4 (6)  | 7.3 (6)  | -0.3 (6) |
| C6  | 12.6 (7) | 15.4 (8)  | 18.4 (7)  | 1.9 (6)  | 6.2 (6)  | -0.3 (6) |
| C7  | 10.8 (7) | 18.0 (8)  | 15.4 (7)  | 4.1 (6)  | 4.3 (6)  | 0.9 (6)  |
| C8  | 16.6 (8) | 22.7 (9)  | 21.4 (8)  | -0.5 (7) | 10.7 (7) | -0.6 (7) |
| C9  | 22.1 (8) | 22.0 (9)  | 25.5 (9)  | -0.9 (7) | 10.3 (7) | -7.3 (7) |
| C10 | 15.4 (7) | 29.3 (10) | 29.0 (9)  | 9.3 (8)  | 11.5 (7) | 0.1 (7)  |
| C11 | 22.4 (8) | 26.6 (10) | 34.6 (10) | 6.0 (8)  | 19.3 (8) | 6.1 (8)  |
| C12 | 21.3 (8) | 17.8 (9)  | 26.2 (9)  | -0.1 (7) | 13.5 (7) | 0.4 (7)  |
| C20 | 30.4 (9) | 22.7 (10) | 22.6 (9)  | 5.6 (8)  | 8.6 (8)  | -1.2 (8) |
| C21 | 19.3 (7) | 15.5 (8)  | 10.6 (7)  | 0.3 (6)  | 7.6 (6)  | -1.2 (6) |
| C22 | 16.7 (7) | 20.7 (9)  | 14.3 (7)  | -1.8 (6) | 8.5 (6)  | -1.2 (7) |
| C23 | 21.7 (8) | 19.5 (9)  | 15.8 (8)  | -2.5 (7) | 9.5 (7)  | -4.2 (7) |
| C24 | 25.8 (9) | 20.3 (10) | 13.1 (8)  | 1.0 (7)  | 8.3 (7)  | -0.6 (7) |
| C25 | 19.8 (8) | 26 (1)    | 15.2 (8)  | 2.9 (7)  | 4.3 (7)  | 1.7 (7)  |
| C26 | 17.4 (7) | 24.2 (10) | 15.5 (8)  | 0.5 (7)  | 6.5 (6)  | -4.5 (7) |
| C31 | 12.4 (7) | 15.3 (8)  | 16.2 (7)  | -0.1 (6) | 5.4 (6)  | 0.1 (6)  |
| C32 | 13.2 (7) | 16.2 (8)  | 18.3 (7)  | 0.7 (7)  | 7.0 (6)  | 0.2 (7)  |
| C33 | 13.8 (7) | 22.6 (10) | 26.7 (9)  | -3.5 (8) | 7.4 (7)  | -0.6 (7) |
| C34 | 13.5 (7) | 31.2 (11) | 32.8 (9)  | -7.0 (8) | 7.8 (7)  | -0.4 (8) |
| C41 | 10.8 (7) | 21.3 (9)  | 14.4 (7)  | 2.3 (6)  | 6.0 (6)  | 2.5 (6)  |
| C42 | 18.5 (8) | 23.5 (10) | 16.7 (8)  | 1.8 (7)  | 7.5 (7)  | -1.0 (7) |
| C43 | 19.5 (8) | 32.1 (11) | 22.8 (9)  | 9.7 (8)  | 9.5 (7)  | -2.0 (8) |
| C44 | 20.5 (8) | 44.7 (13) | 20.7 (8)  | 10.5 (8) | 14.3 (7) | 8.8 (8)  |
| C45 | 28.0 (9) | 34.7 (11) | 20.2 (9)  | 2.7 (8)  | 14.7 (7) | 14.6 (8) |
| C46 | 23.3 (8) | 21.5 (9)  | 19.4 (8)  | 2.1 (7)  | 11.0 (7) | 8.6 (7)  |

**Table S4. Bond Lengths for 3e.**

| Atom | Atom | Length/Å    | Atom | Atom | Length/Å  |
|------|------|-------------|------|------|-----------|
| S1   | O1   | 1.4328 (12) | C10  | C11  | 1.384 (3) |
| S1   | O2   | 1.4305 (12) | C11  | C12  | 1.395 (2) |
| S1   | N1   | 1.6672 (14) | C20  | C24  | 1.506 (3) |
| S1   | C21  | 1.7627 (17) | C21  | C22  | 1.389 (2) |
| O3   | C2   | 1.208 (2)   | C21  | C26  | 1.386 (2) |
| O4   | C4   | 1.425 (2)   | C22  | C23  | 1.387 (3) |
| N1   | C2   | 1.405 (2)   | C23  | C24  | 1.400 (3) |
| N1   | C5   | 1.4964 (19) | C24  | C25  | 1.391 (3) |
| C2   | C3   | 1.516 (2)   | C25  | C26  | 1.395 (3) |
| C3   | C4   | 1.546 (2)   | C31  | C32  | 1.530 (2) |
| C3   | C31  | 1.525 (2)   | C32  | C33  | 1.525 (2) |
| C4   | C5   | 1.561 (2)   | C33  | C34  | 1.525 (2) |
| C4   | C41  | 1.528 (2)   | C41  | C42  | 1.390 (3) |
| C5   | C6   | 1.538 (2)   | C41  | C46  | 1.390 (3) |
| C6   | C7   | 1.517 (2)   | C42  | C43  | 1.396 (2) |
| C7   | C8   | 1.393 (3)   | C43  | C44  | 1.380 (3) |
| C7   | C12  | 1.386 (2)   | C44  | C45  | 1.388 (3) |
| C8   | C9   | 1.388 (2)   | C45  | C46  | 1.393 (2) |
| C9   | C10  | 1.387 (3)   |      |      |           |

**Table S5. Bond Angles for 3e.**

| Atom | Atom | Atom | Angle/°    | Atom | Atom | Atom | Angle/°     |
|------|------|------|------------|------|------|------|-------------|
| O1   | S1   | N1   | 106.81 (7) | C12  | C7   | C8   | 118.28 (15) |
| O1   | S1   | C21  | 109.49 (7) | C9   | C8   | C7   | 120.96 (16) |
| O2   | S1   | O1   | 119.59 (8) | C10  | C9   | C8   | 120.33 (17) |
| O2   | S1   | N1   | 106.00 (7) | C11  | C10  | C9   | 119.20 (16) |
| O2   | S1   | C21  | 108.78 (8) | C10  | C11  | C12  | 120.27 (17) |
| N1   | S1   | C21  | 105.19 (7) | C7   | C12  | C11  | 120.93 (17) |

|     |    |     |             |     |     |     |             |
|-----|----|-----|-------------|-----|-----|-----|-------------|
| C2  | N1 | S1  | 122.01 (11) | C22 | C21 | S1  | 118.53 (13) |
| C2  | N1 | C5  | 112.37 (13) | C26 | C21 | S1  | 119.67 (13) |
| C5  | N1 | S1  | 123.73 (11) | C26 | C21 | C22 | 121.76 (16) |
| O3  | C2 | N1  | 125.14 (15) | C23 | C22 | C21 | 118.54 (15) |
| O3  | C2 | C3  | 128.27 (14) | C22 | C23 | C24 | 121.30 (16) |
| N1  | C2 | C3  | 106.58 (12) | C23 | C24 | C20 | 119.82 (16) |
| C2  | C3 | C4  | 101.15 (12) | C25 | C24 | C20 | 121.53 (17) |
| C2  | C3 | C31 | 112.64 (12) | C25 | C24 | C23 | 118.62 (16) |
| C31 | C3 | C4  | 117.61 (13) | C24 | C25 | C26 | 121.03 (16) |
| O4  | C4 | C3  | 107.87 (12) | C21 | C26 | C25 | 118.71 (16) |
| O4  | C4 | C5  | 106.34 (12) | C3  | C31 | C32 | 111.63 (13) |
| O4  | C4 | C41 | 112.17 (13) | C33 | C32 | C31 | 112.58 (15) |
| C3  | C4 | C5  | 102.67 (12) | C34 | C33 | C32 | 112.98 (16) |
| C41 | C4 | C3  | 114.05 (13) | C42 | C41 | C4  | 120.78 (15) |
| C41 | C4 | C5  | 113.01 (13) | C46 | C41 | C4  | 120.76 (16) |
| N1  | C5 | C4  | 101.01 (11) | C46 | C41 | C42 | 118.42 (16) |
| N1  | C5 | C6  | 114.00 (13) | C41 | C42 | C43 | 120.95 (18) |
| C6  | C5 | C4  | 114.35 (13) | C44 | C43 | C42 | 120.23 (19) |
| C7  | C6 | C5  | 114.56 (14) | C43 | C44 | C45 | 119.29 (16) |
| C8  | C7 | C6  | 121.52 (15) | C44 | C45 | C46 | 120.49 (18) |
| C12 | C7 | C6  | 120.12 (15) | C41 | C46 | C45 | 120.62 (18) |

**Table S6. Hydrogen Bonds for 3e.**

| D  | H  | A               | d(D-H)/Å | d(H-A)/Å | d(D-A)/Å    | D-H-A/° |
|----|----|-----------------|----------|----------|-------------|---------|
| O4 | H4 | O1 <sup>1</sup> | 0.84     | 2.37     | 3.1885 (17) | 165.9   |

<sup>1</sup>1-X,1/2+Y,1-Z

**Table S7. Torsion Angles for 3e.**

| <b>A</b> | <b>B</b> | <b>C</b> | <b>D</b> | <b>Angle/°</b> | <b>A</b> | <b>B</b> | <b>C</b> | <b>D</b> | <b>Angle/°</b> |
|----------|----------|----------|----------|----------------|----------|----------|----------|----------|----------------|
| S1       | N1       | C2       | O3       | 28.1(2)        | C4       | C41      | C42      | C43      | 177.99(15)     |
| S1       | N1       | C2       | C3       | -153.24(11)    | C4       | C41      | C46      | C45      | -177.39(15)    |
| S1       | N1       | C5       | C4       | 178.39(11)     | C5       | N1       | C2       | O3       | -167.08(16)    |
| S1       | N1       | C5       | C6       | -58.49(18)     | C5       | N1       | C2       | C3       | 11.60(18)      |
| S1       | C21      | C22      | C23      | -176.34(12)    | C5       | C4       | C41      | C42      | 46.4(2)        |
| S1       | C21      | C26      | C25      | 176.67(13)     | C5       | C4       | C41      | C46      | -135.83(16)    |
| O1       | S1       | N1       | C2       | 23.89(15)      | C5       | C6       | C7       | C8       | -56.5(2)       |
| O1       | S1       | N1       | C5       | -139.22(13)    | C5       | C6       | C7       | C12      | 126.82(17)     |
| O1       | S1       | C21      | C22      | -46.39(14)     | C6       | C7       | C8       | C9       | -175.81(17)    |
| O1       | S1       | C21      | C26      | 135.94(13)     | C6       | C7       | C12      | C11      | 176.92(16)     |
| O2       | S1       | N1       | C2       | 152.44(13)     | C7       | C8       | C9       | C10      | -0.7(3)        |
| O2       | S1       | N1       | C5       | -10.67(15)     | C8       | C7       | C12      | C11      | 0.1(3)         |
| O2       | S1       | C21      | C22      | -178.73(12)    | C8       | C9       | C10      | C11      | -0.5(3)        |
| O2       | S1       | C21      | C26      | 3.60(15)       | C9       | C10      | C11      | C12      | 1.6(3)         |
| O3       | C2       | C3       | C4       | 146.49(18)     | C10      | C11      | C12      | C7       | -1.4(3)        |
| O3       | C2       | C3       | C31      | 20.0(2)        | C12      | C7       | C8       | C9       | 0.9(2)         |
| O4       | C4       | C5       | N1       | 80.23(14)      | C20      | C24      | C25      | C26      | -176.71(17)    |
| O4       | C4       | C5       | C6       | -42.65(16)     | C21      | S1       | N1       | C2       | -92.42(14)     |
| O4       | C4       | C41      | C42      | 166.60(14)     | C21      | S1       | N1       | C5       | 104.48(14)     |
| O4       | C4       | C41      | C46      | -15.6(2)       | C21      | C22      | C23      | C24      | -0.1(2)        |
| N1       | S1       | C21      | C22      | 68.06(14)      | C22      | C21      | C26      | C25      | -0.9(3)        |
| N1       | S1       | C21      | C26      | -109.60(14)    | C22      | C23      | C24      | C20      | 177.10(16)     |
| N1       | C2       | C3       | C4       | -32.14(16)     | C22      | C23      | C24      | C25      | -1.4(2)        |
| N1       | C2       | C3       | C31      | -158.59(13)    | C23      | C24      | C25      | C26      | 1.7(3)         |
| N1       | C5       | C6       | C7       | 138.70(14)     | C24      | C25      | C26      | C21      | -0.6(3)        |
| C2       | N1       | C5       | C4       | 13.85(17)      | C26      | C21      | C22      | C23      | 1.3(2)         |
| C2       | N1       | C5       | C6       | 136.97(14)     | C31      | C3       | C4       | O4       | 50.95(17)      |
| C2       | C3       | C4       | O4       | -72.14(14)     | C31      | C3       | C4       | C5       | 163.00(13)     |
| C2       | C3       | C4       | C5       | 39.92(15)      | C31      | C3       | C4       | C41      | -74.37(18)     |

|                |              |                 |              |
|----------------|--------------|-----------------|--------------|
| C2 C3 C4 C41   | 162.54 (14)  | C31 C32 C33 C34 | -178.99 (14) |
| C2 C3 C31 C32  | -77.72 (17)  | C41 C4 C5 N1    | -156.27 (13) |
| C3 C4 C5 N1    | -32.96 (15)  | C41 C4 C5 C6    | 80.85 (17)   |
| C3 C4 C5 C6    | -155.83 (13) | C41 C42 C43 C44 | -0.7 (3)     |
| C3 C4 C41 C42  | -70.39 (19)  | C42 C41 C46 C45 | 0.5 (2)      |
| C3 C4 C41 C46  | 107.39 (17)  | C42 C43 C44 C45 | 0.7 (3)      |
| C3 C31 C32 C33 | 171.14 (14)  | C43 C44 C45 C46 | -0.1 (3)     |
| C4 C3 C31 C32  | 165.24 (13)  | C44 C45 C46 C41 | -0.5 (3)     |
| C4 C5 C6 C7    | -105.77 (16) | C46 C41 C42 C43 | 0.2 (2)      |

**Table S8. Hydrogen Atom Coordinates ( $\text{\AA}\times 10^4$ ) and Isotropic Displacement Parameters ( $\text{\AA}^2\times 10^3$ ) for 3e.**

| Atom | <i>x</i> | <i>y</i> | <i>z</i> | U(eq) |
|------|----------|----------|----------|-------|
| H4   | 4584     | 3647     | 6236     | 24    |
| H3   | 5171     | 145      | 5860     | 16    |
| H5   | 2655     | 299      | 4429     | 17    |
| H6A  | 1870     | 3151     | 4254     | 19    |
| H6B  | 1473     | 2451     | 2940     | 19    |
| H8   | 525      | -298     | 2950     | 23    |
| H9   | -1325    | -1245    | 2872     | 28    |
| H10  | -2433    | 15       | 3722     | 29    |
| H11  | -1647    | 2213     | 4680     | 31    |
| H12  | 174      | 3193     | 4702     | 25    |
| H20A | 1228     | 6710     | -907     | 40    |
| H20B | 2553     | 6572     | -946     | 40    |
| H20C | 2510     | 7263     | 227      | 40    |
| H22  | 4641     | 2936     | 1991     | 20    |
| H23  | 4281     | 5142     | 990      | 22    |
| H25  | 481      | 4538     | -484     | 26    |



|      |       |       |      |    |
|------|-------|-------|------|----|
| H26  | 824   | 2333  | 530  | 23 |
| H31A | 6386  | 1920  | 7476 | 18 |
| H31B | 6538  | 2783  | 6425 | 18 |
| H32A | 7488  | -41   | 7261 | 19 |
| H32B | 7492  | 643   | 6069 | 19 |
| H33A | 8868  | 2493  | 7310 | 26 |
| H33B | 8877  | 1785  | 8500 | 26 |
| H34A | 9891  | 417   | 7060 | 40 |
| H34B | 9940  | -240  | 8285 | 40 |
| H34C | 10741 | 1165  | 8358 | 40 |
| H42  | 3204  | -726  | 6134 | 24 |
| H43  | 2842  | -1486 | 7759 | 30 |
| H44  | 3108  | 99    | 9328 | 32 |
| H45  | 3698  | 2466  | 9240 | 31 |
| H46  | 4024  | 3239  | 7599 | 25 |

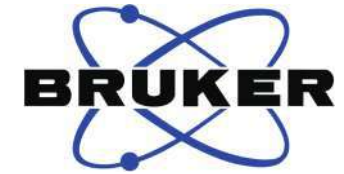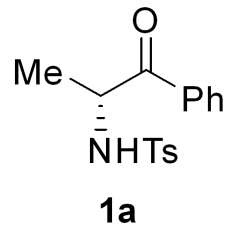

7.772  
7.753  
7.696  
7.676  
7.608  
7.589  
7.571  
7.465  
7.446  
7.427  
7.260  
7.174  
7.154  
5.782  
5.762  
4.964  
4.946  
4.928  
4.909  
4.890

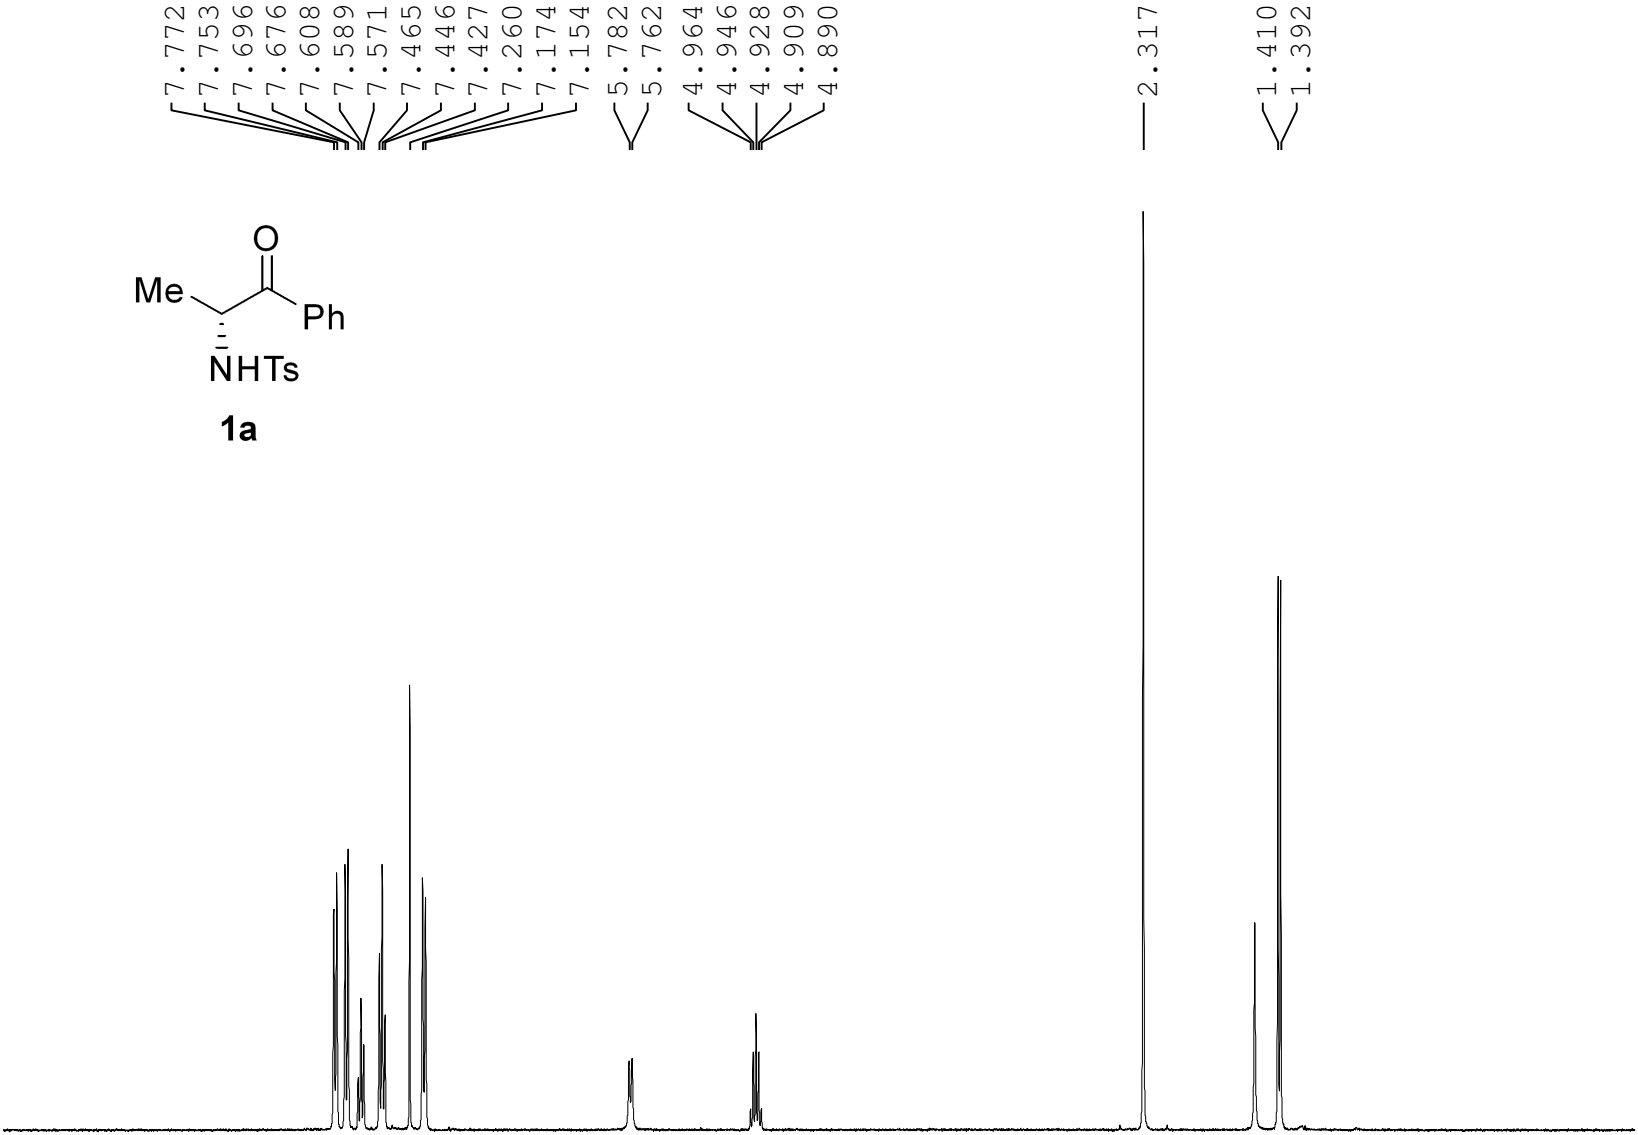

2.02  
2.00  
1.02  
2.02  
2.01  
0.86  
1.04  
3.01  
3.04

2.317  
1.410  
1.392

Current Data Parameters  
NAME qh-11241  
EXPNO 2  
PROCNO 1

F2 - Acquisition Parameters  
Date\_ 20150401  
Time 19.08  
INSTRUM spect  
PROBHD 5 mm PABBO BB/  
PULPROG zg30  
TD 65536  
SOLVENT CDC13  
NS 2  
DS 0  
SWH 8012.820 Hz  
FIDRES 0.122266 Hz  
AQ 4.0894465 sec  
RG 187.77  
DW 62.400 usec  
DE 6.50 usec  
TE 296.4 K  
D1 1.00000000 sec  
TD0 1

==== CHANNEL f1 =====  
SFO1 400.1324710 MHz  
NUC1 1H  
P1 14.50 usec  
PLW1 11.99499989 W

F2 - Processing parameters  
SI 65536  
SF 400.130092 MHz  
WDW EM  
SSB 0  
LB 0.30 Hz  
GB 0  
PC 1.00

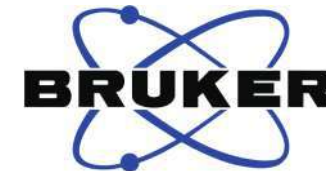

—198.225

143.662  
137.202  
134.235  
133.521  
129.811  
129.000  
128.619  
127.199

77.479  
77.160  
76.843

—53.491

21.582  
21.304

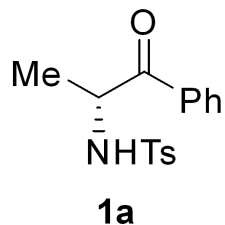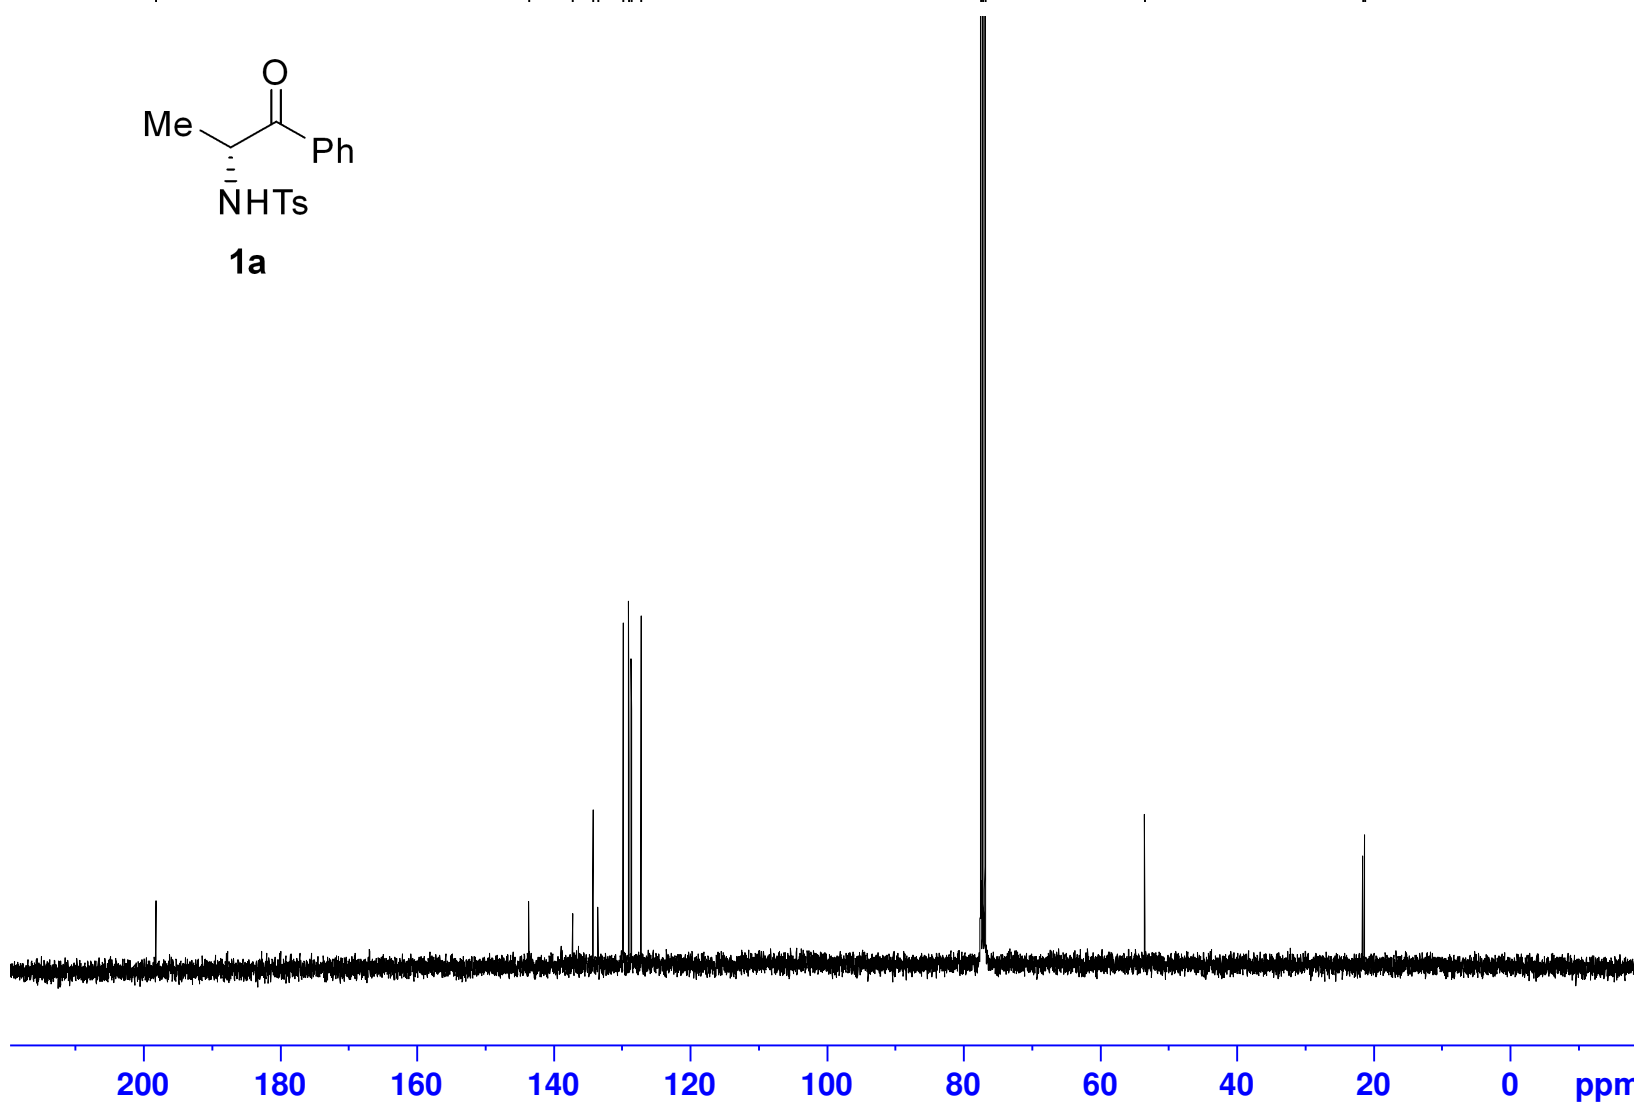

Current Data Parameters  
NAME qh-11241  
EXPNO 5  
PROCNO 1

F2 - Acquisition Parameters  
Date\_ 20150401  
Time 19.49  
INSTRUM spect  
PROBHD 5 mm PABBO BB/  
PULPROG zgpg30  
TD 65536  
SOLVENT CDC13  
NS 369  
DS 2  
SWH 24038.461 Hz  
FIDRES 0.366798 Hz  
AQ 1.3631488 sec  
RG 196.92  
DW 20.800 usec  
DE 6.50 usec  
TE 297.4 K  
D1 2.00000000 sec  
D11 0.03000000 sec  
TD0 1

==== CHANNEL f1 =====  
SFO1 100.6228298 MHz  
NUC1 13C  
P1 9.70 usec  
PLW1 46.98899841 W

==== CHANNEL f2 =====  
SFO2 400.1316005 MHz  
NUC2 1H  
CPDPRG[2] waltz16  
PCPD2 90.00 usec  
PLW2 11.99499989 W  
PLW12 0.34213999 W  
PLW13 0.27713001 W

F2 - Processing parameters  
SI 32768  
SF 100.6127546 MHz  
WDW EM  
SSB 0  
LB 1.00 Hz  
GB 0  
PC 1.40

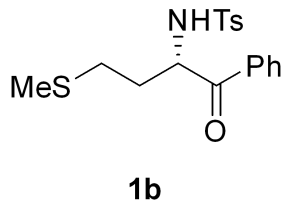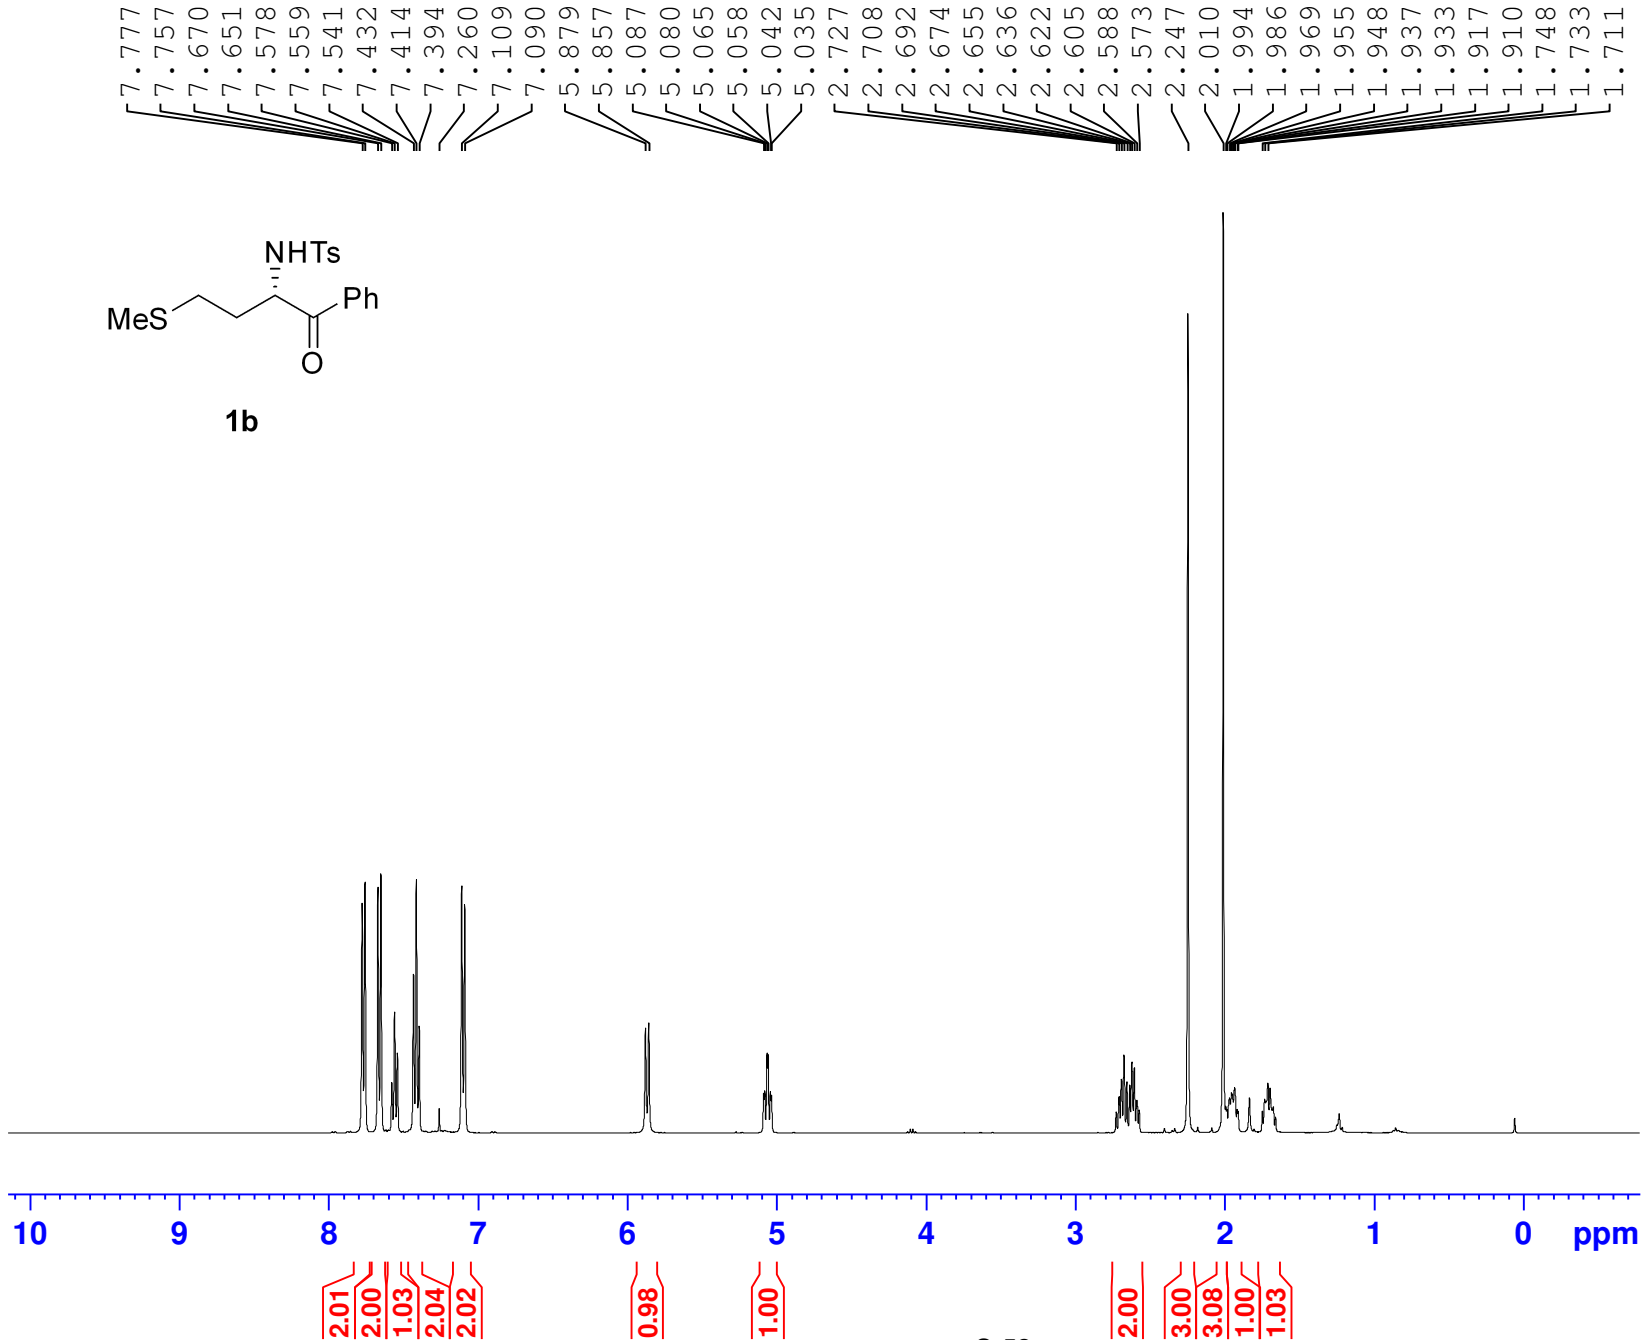

Current Data Parameters  
NAME qh-11120  
EXPNO 1  
PROCNO 1

F2 - Acquisition Parameters  
Date\_ 20150108  
Time 16.19  
INSTRUM spect  
PROBHD 5 mm DUL 13C-1  
PULPROG zg30  
TD 65536  
SOLVENT CDC13  
NS 2  
DS 0  
SWH 8012.820 Hz  
FIDRES 0.122266 Hz  
AQ 4.0894465 sec  
RG 25.32  
DW 62.400 usec  
DE 6.50 usec  
TE 295.9 K  
D1 1.00000000 sec  
TD0 1

==== CHANNEL f1 =====  
SFO1 400.1324710 MHz  
NUC1 1H  
P1 14.30 usec  
PLW1 9.10000038 W

F2 - Processing parameters  
SI 65536  
SF 400.1300095 MHz  
WDW EM  
SSB 0  
LB 0.30 Hz  
GB 0  
PC 1.00

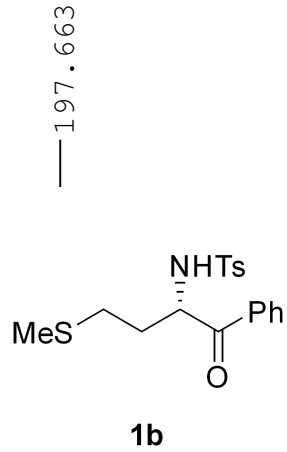

— 197.663

143.668  
136.480  
134.204  
133.513  
129.678  
128.913  
128.492  
127.229

77.481  
77.162  
76.844

— 56.294

33.383  
30.300  
21.447  
15.513

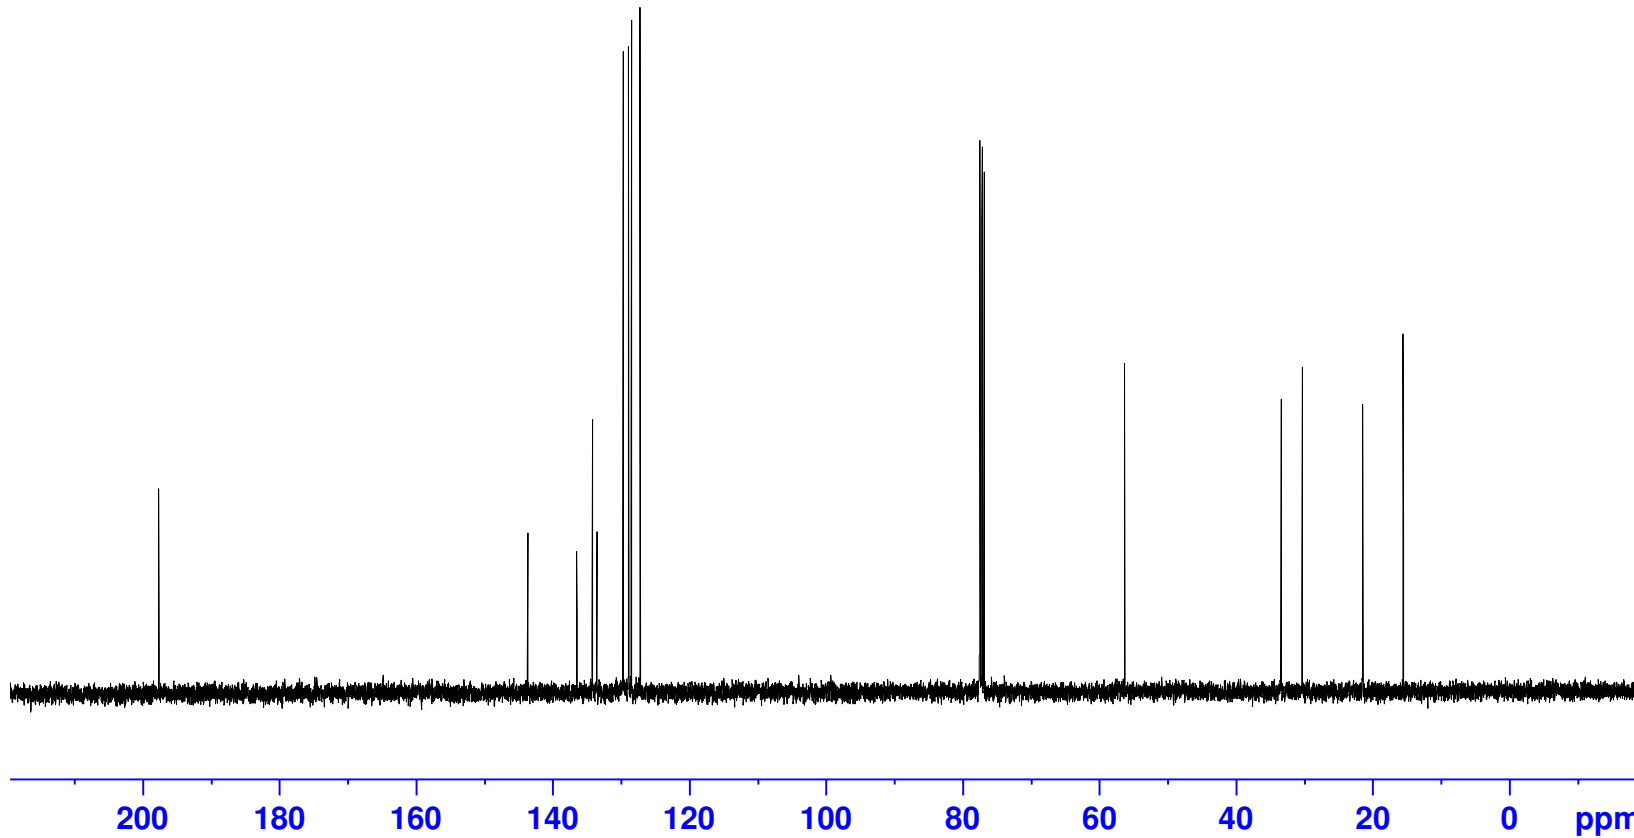

Current Data Parameters  
NAME qh-11120  
EXPNO 2  
PROCNO 1

F2 - Acquisition Parameters  
Date\_ 20150108  
Time 16.21  
INSTRUM spect  
PROBHD 5 mm DUL 13C-1  
PULPROG zgpg30  
TD 65536  
SOLVENT CDC13  
NS 40  
DS 2  
SWH 24038.461 Hz  
FIDRES 0.366798 Hz  
AQ 1.3631488 sec  
RG 196.92  
DW 20.800 usec  
DE 6.50 usec  
TE 296.4 K  
D1 2.00000000 sec  
D11 0.03000000 sec  
TD0 1

==== CHANNEL f1 =====  
SFO1 100.6228298 MHz  
NUC1 13C  
P1 9.60 usec  
PLW1 31.98900032 W

==== CHANNEL f2 =====  
SFO2 400.1316005 MHz  
NUC2 1H  
CPDPRG[2] waltz16  
PCPD2 90.00 usec  
PLW2 9.10000038 W  
PLW12 0.24608000 W  
PLW13 0.19933000 W

F2 - Processing parameters  
SI 32768  
SF 100.6127663 MHz  
WDW EM  
SSB 0  
LB 1.00 Hz  
GB 0  
PC 1.40

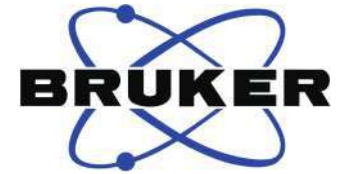

7.811  
7.791  
7.550  
7.531  
7.491  
7.472  
7.454  
7.354  
7.336  
7.316  
7.259  
7.195  
7.182  
7.159  
7.152  
7.049  
7.029  
6.368  
6.350  
6.030  
6.011

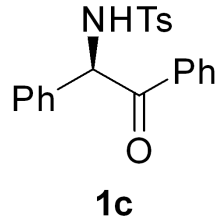

2.272

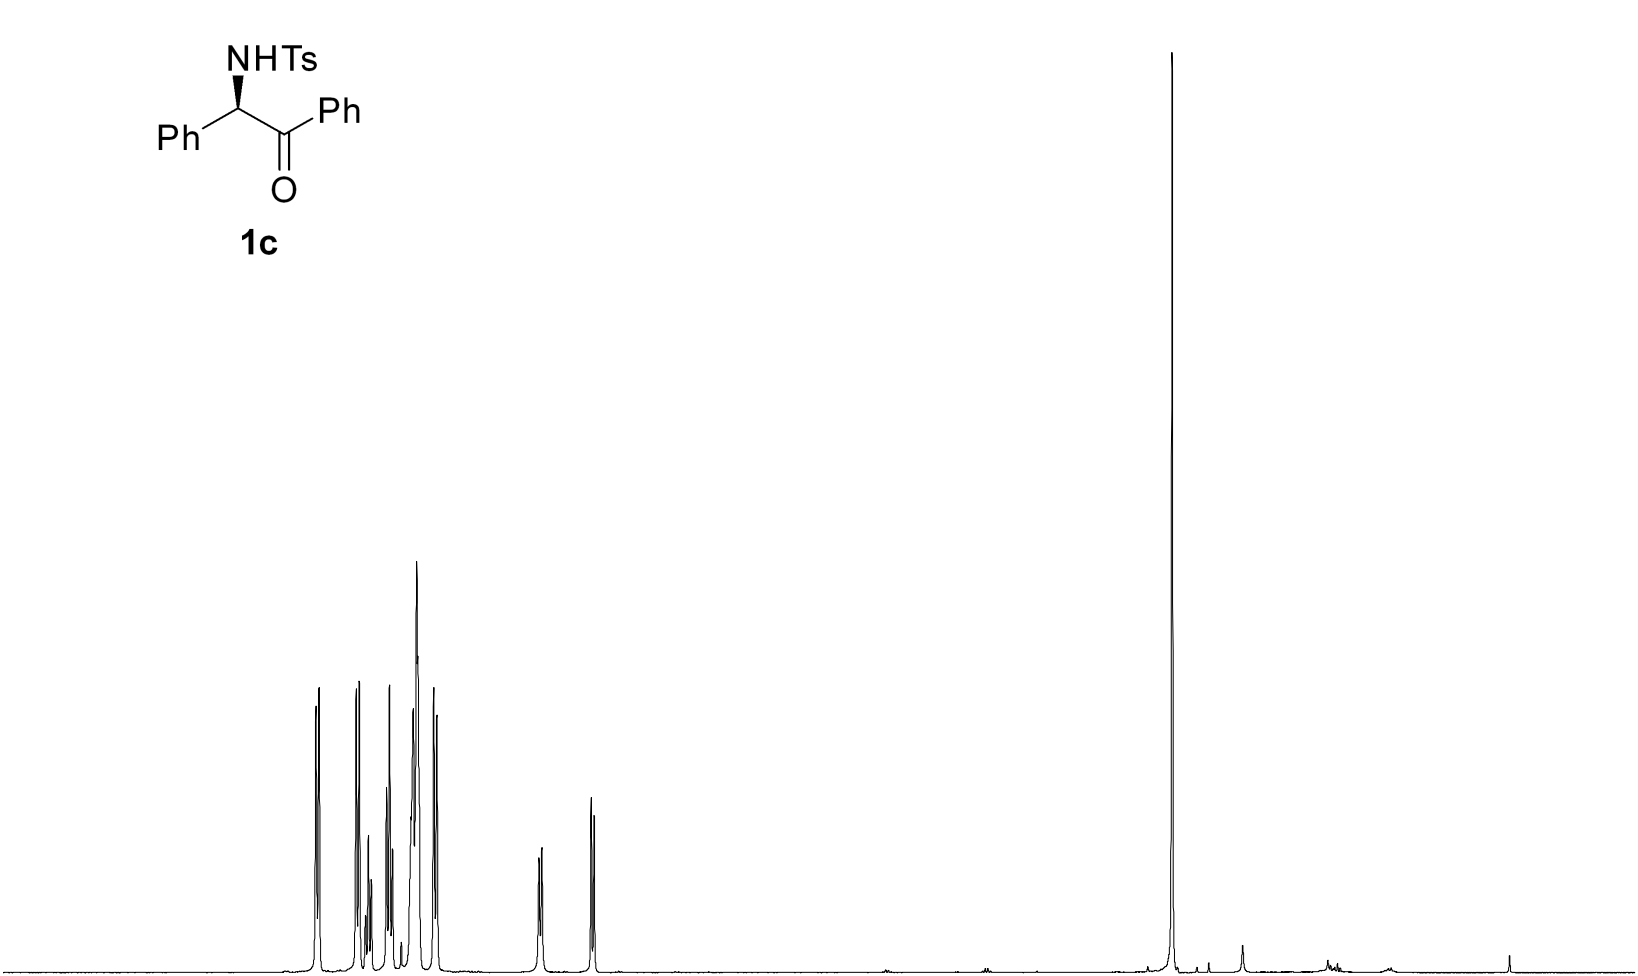

Current Data Parameters  
NAME qh-11109  
EXPNO 1  
PROCNO 1

F2 - Acquisition Parameters  
Date\_ 20150103  
Time 16.31  
INSTRUM spect  
PROBHD 5 mm DUL 13C-1  
PULPROG zg30  
TD 65536  
SOLVENT CDC13  
NS 1  
DS 0  
SWH 8012.820 Hz  
FIDRES 0.122266 Hz  
AQ 4.0894465 sec  
RG 39.46  
DW 62.400 usec  
DE 6.50 usec  
TE 295.7 K  
D1 1.00000000 sec  
TD0 1

==== CHANNEL f1 =====  
SFO1 400.1324710 MHz  
NUC1 1H  
P1 14.30 usec  
PLW1 9.10000038 W

F2 - Processing parameters  
SI 65536  
SF 400.1300094 MHz  
WDW EM  
SSB 0  
LB 0.30 Hz  
GB 0  
PC 1.00

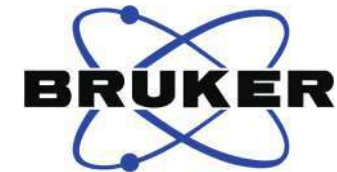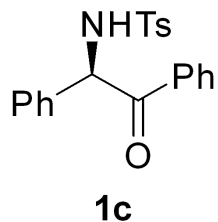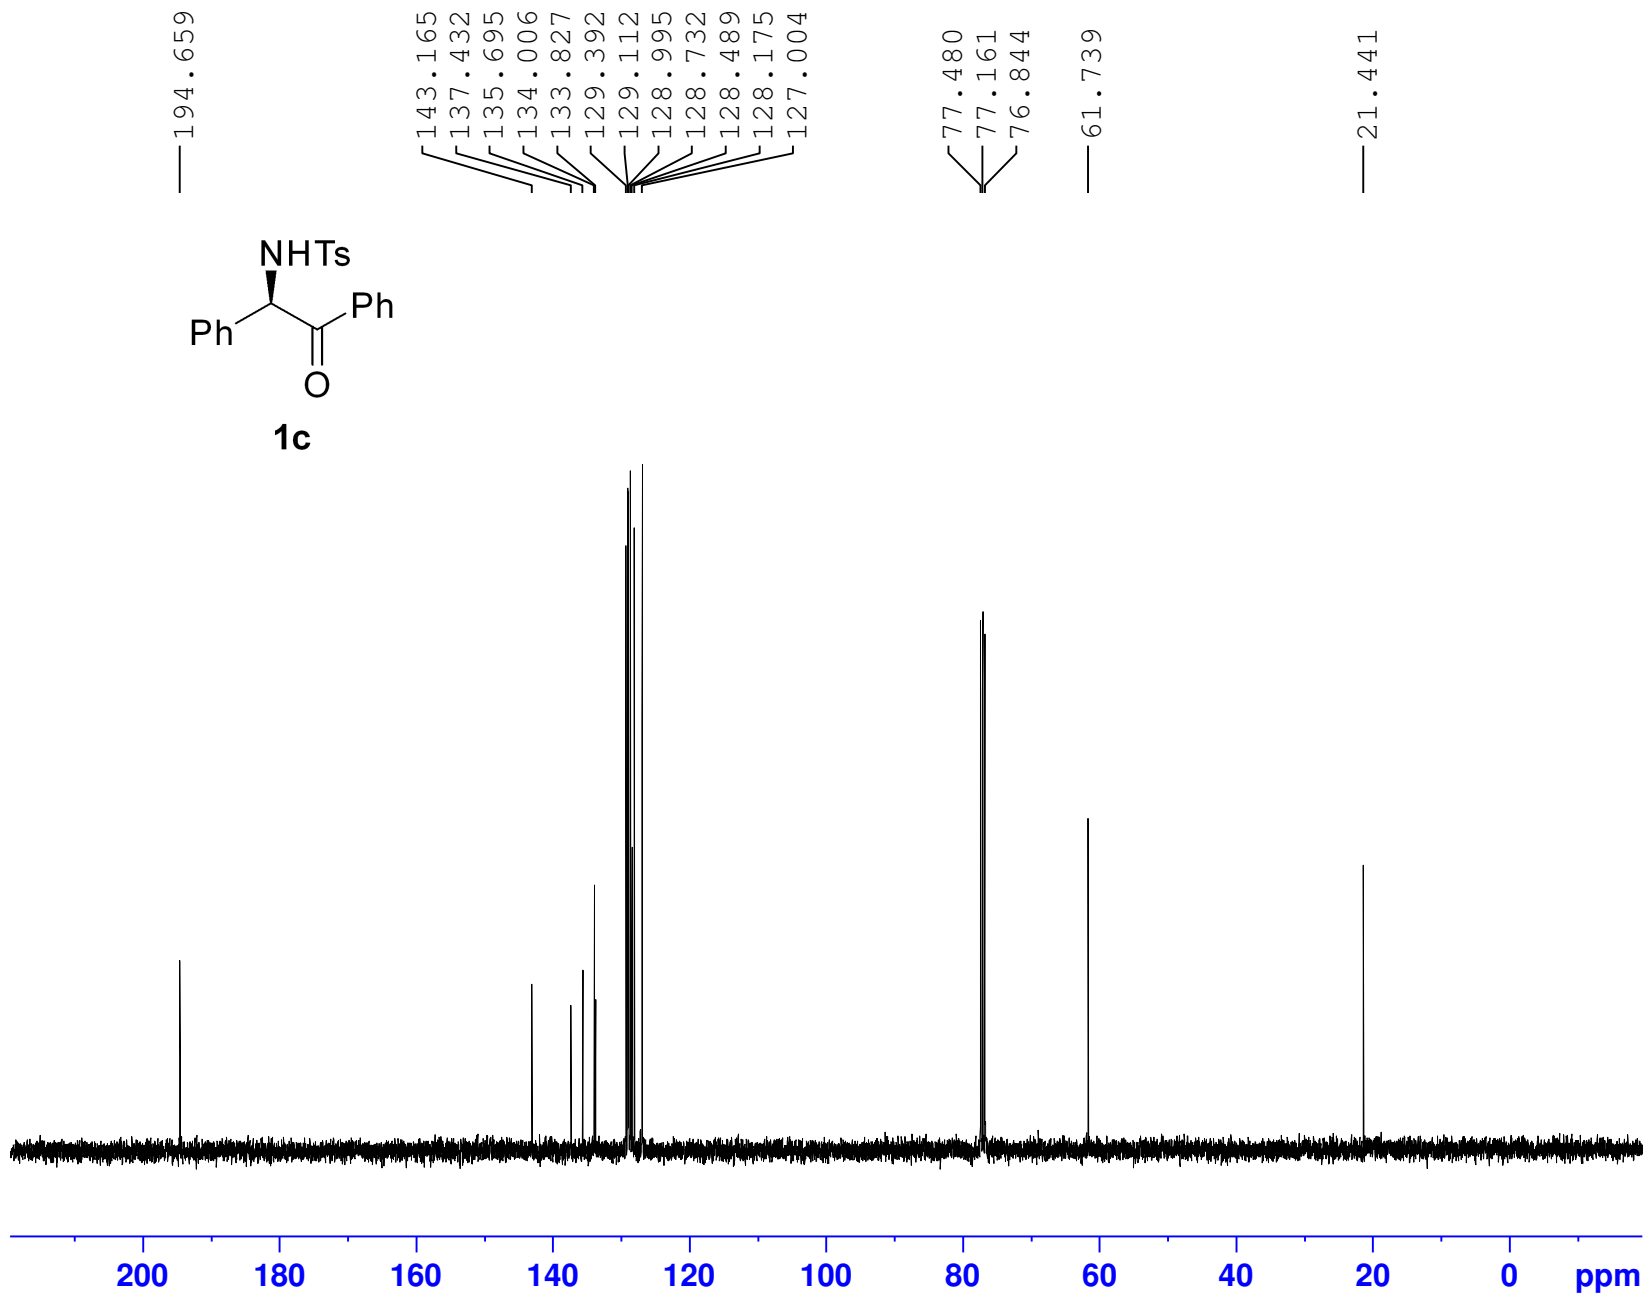

Current Data Parameters  
NAME qh-11109  
EXPNO 2  
PROCNO 1

F2 - Acquisition Parameters  
Date\_ 20150103  
Time 16.33  
INSTRUM spect  
PROBHD 5 mm DUL 13C-1  
PULPROG zgpg30  
TD 65536  
SOLVENT CDCl3  
NS 31  
DS 2  
SWH 24038.461 Hz  
FIDRES 0.366798 Hz  
AQ 1.3631488 sec  
RG 196.92  
DW 20.800 usec  
DE 6.50 usec  
TE 296.3 K  
D1 2.00000000 sec  
D11 0.03000000 sec  
TD0 1

==== CHANNEL f1 =====  
SFO1 100.6228298 MHz  
NUC1 13C  
P1 9.60 usec  
PLW1 31.98900032 W

==== CHANNEL f2 =====  
SFO2 400.1316005 MHz  
NUC2 1H  
CPDPRG[2] waltz16  
PCPD2 90.00 usec  
PLW2 9.10000038 W  
PLW12 0.24608000 W  
PLW13 0.19933000 W

F2 - Processing parameters  
SI 32768  
SF 100.6127663 MHz  
WDW EM  
SSB 0  
LB 1.00 Hz  
GB 0  
PC 1.40

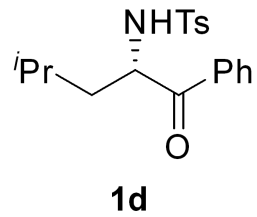

7.689  
7.670  
7.636  
7.617  
7.586  
7.567  
7.549  
7.436  
7.418  
7.399  
7.260  
7.079  
7.060

5.622  
5.598  
4.901  
4.891  
4.877  
4.868  
4.854  
4.844

2.247  
2.056  
2.040  
2.023  
2.007  
1.991  
1.411  
1.400  
1.388  
1.363  
1.045  
1.029  
0.888  
0.871

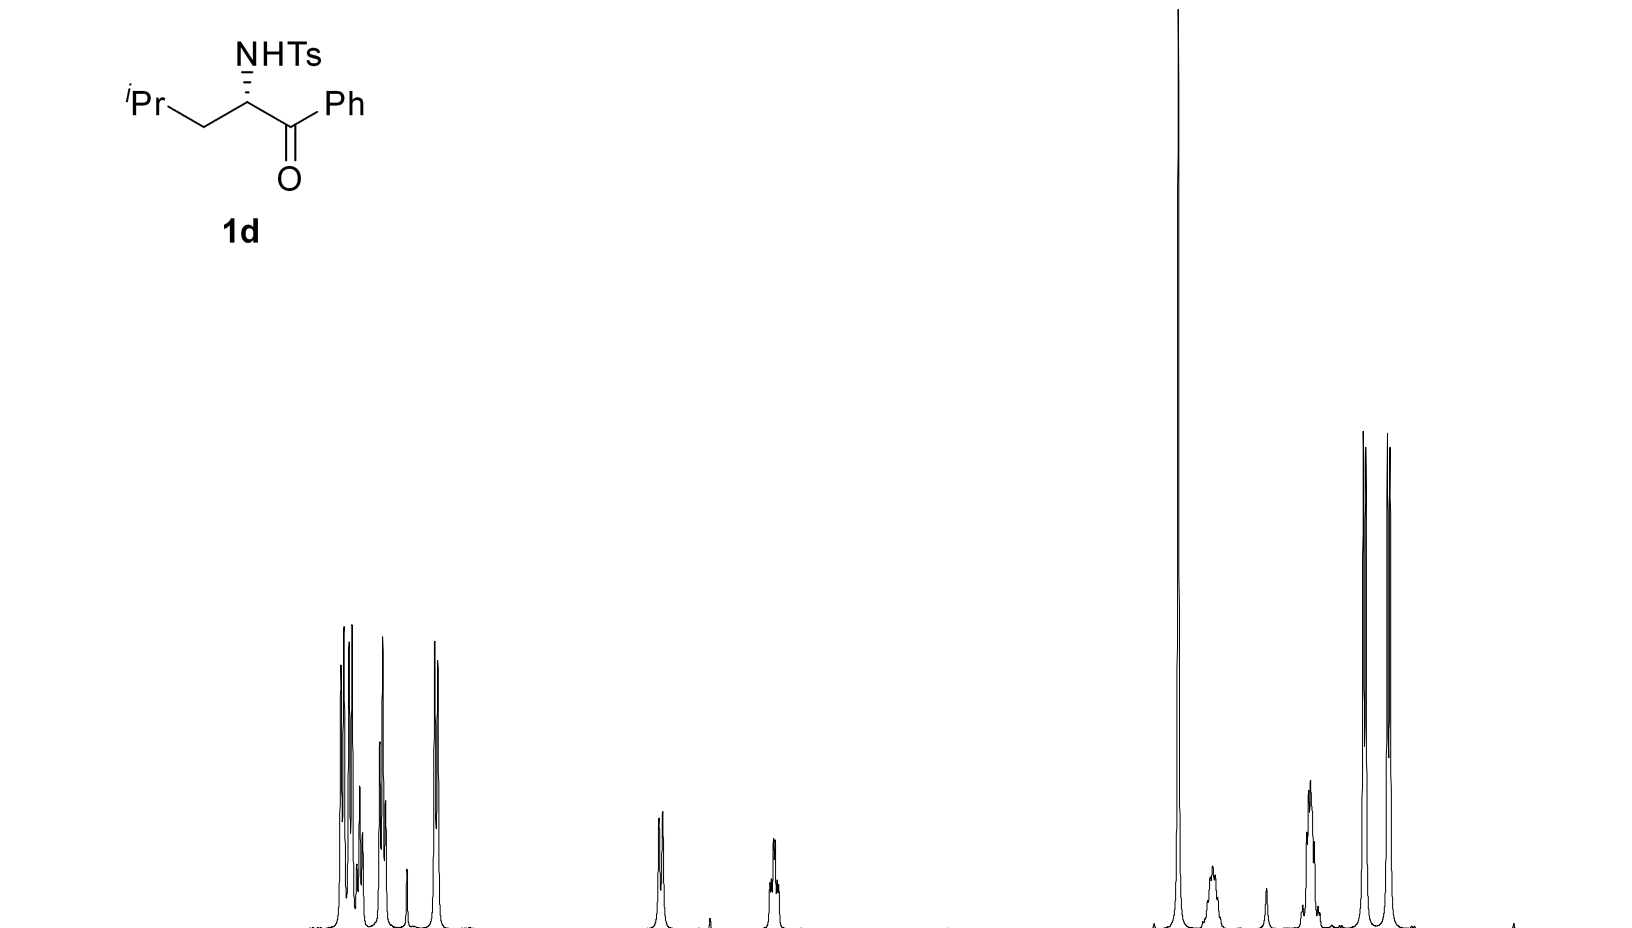

4.09  
1.12  
2.15  
2.06

1.00  
1.03

3.10  
1.05  
2.08  
3.14  
3.17

Current Data Parameters  
NAME qh-11129  
EXPNO 1  
PROCNO 1

F2 - Acquisition Parameters  
Date\_ 20150112  
Time 22.24  
INSTRUM spect  
PROBHD 5 mm DUL 13C-1  
PULPROG zg30  
TD 65536  
SOLVENT CDC13  
NS 2  
DS 0  
SWH 8012.820 Hz  
FIDRES 0.122266 Hz  
AQ 4.0894465 sec  
RG 54.81  
DW 62.400 usec  
DE 6.50 usec  
TE 296.3 K  
D1 1.00000000 sec  
TD0 1

==== CHANNEL f1 =====  
SFO1 400.1324710 MHz  
NUC1 1H  
P1 14.30 usec  
PLW1 9.10000038 W

F2 - Processing parameters  
SI 65536  
SF 400.1300096 MHz  
WDW EM  
SSB 0  
LB 0.30 Hz  
GB 0  
PC 1.00





—198.663

143.583  
136.702  
134.053  
133.903  
129.645  
128.900  
128.272  
127.326

77.481  
77.163  
76.845

—56.153

—43.097

24.742  
23.413  
21.492  
21.253

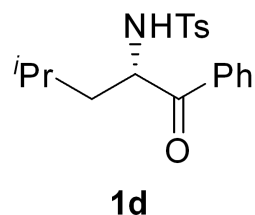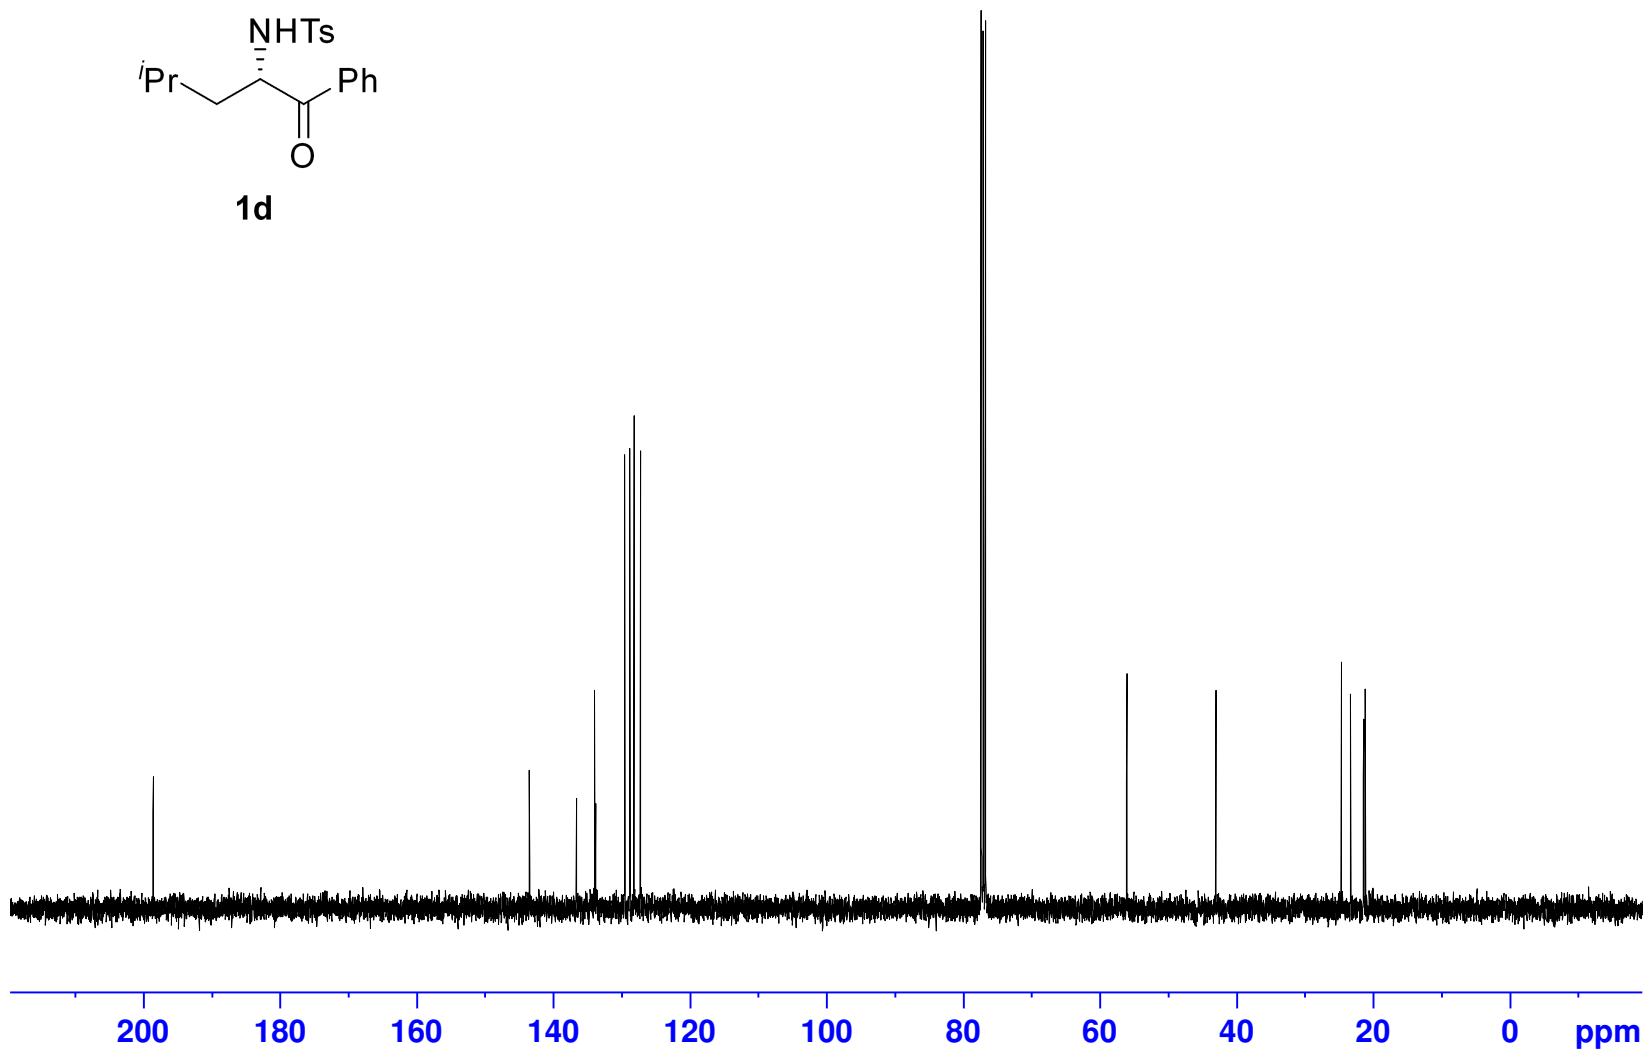

Current Data Parameters  
NAME qh-11129  
EXPNO 2  
PROCNO 1

F2 - Acquisition Parameters  
Date\_ 20150112  
Time 22.25  
INSTRUM spect  
PROBHD 5 mm DUL 13C-1  
PULPROG zgpg30  
TD 65536  
SOLVENT CDC13  
NS 76  
DS 2  
SWH 24038.461 Hz  
FIDRES 0.366798 Hz  
AQ 1.3631488 sec  
RG 196.92  
DW 20.800 usec  
DE 6.50 usec  
TE 296.8 K  
D1 2.00000000 sec  
D11 0.03000000 sec  
TD0 1

==== CHANNEL f1 =====  
SFO1 100.6228298 MHz  
NUC1 13C  
P1 9.60 usec  
PLW1 31.98900032 W

==== CHANNEL f2 =====  
SFO2 400.1316005 MHz  
NUC2 1H  
CPDPRG[2] waltz16  
PCPD2 90.00 usec  
PLW2 9.10000038 W  
PLW12 0.24608000 W  
PLW13 0.19933000 W

F2 - Processing parameters  
SI 32768  
SF 100.6127583 MHz  
WDW EM  
SSB 0  
LB 1.00 Hz  
GB 0  
PC 1.40



7.721  
7.701  
7.601  
7.581  
7.560  
7.444  
7.425  
7.406  
7.260  
7.184  
7.176  
7.170  
7.102  
7.082  
6.983  
5.618  
5.596  
5.165  
5.151  
5.143  
5.136  
5.129  
5.114  
3.167  
3.153  
3.132  
3.118  
2.988  
2.974  
2.954  
2.939  
2.287

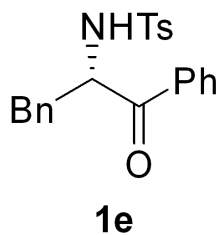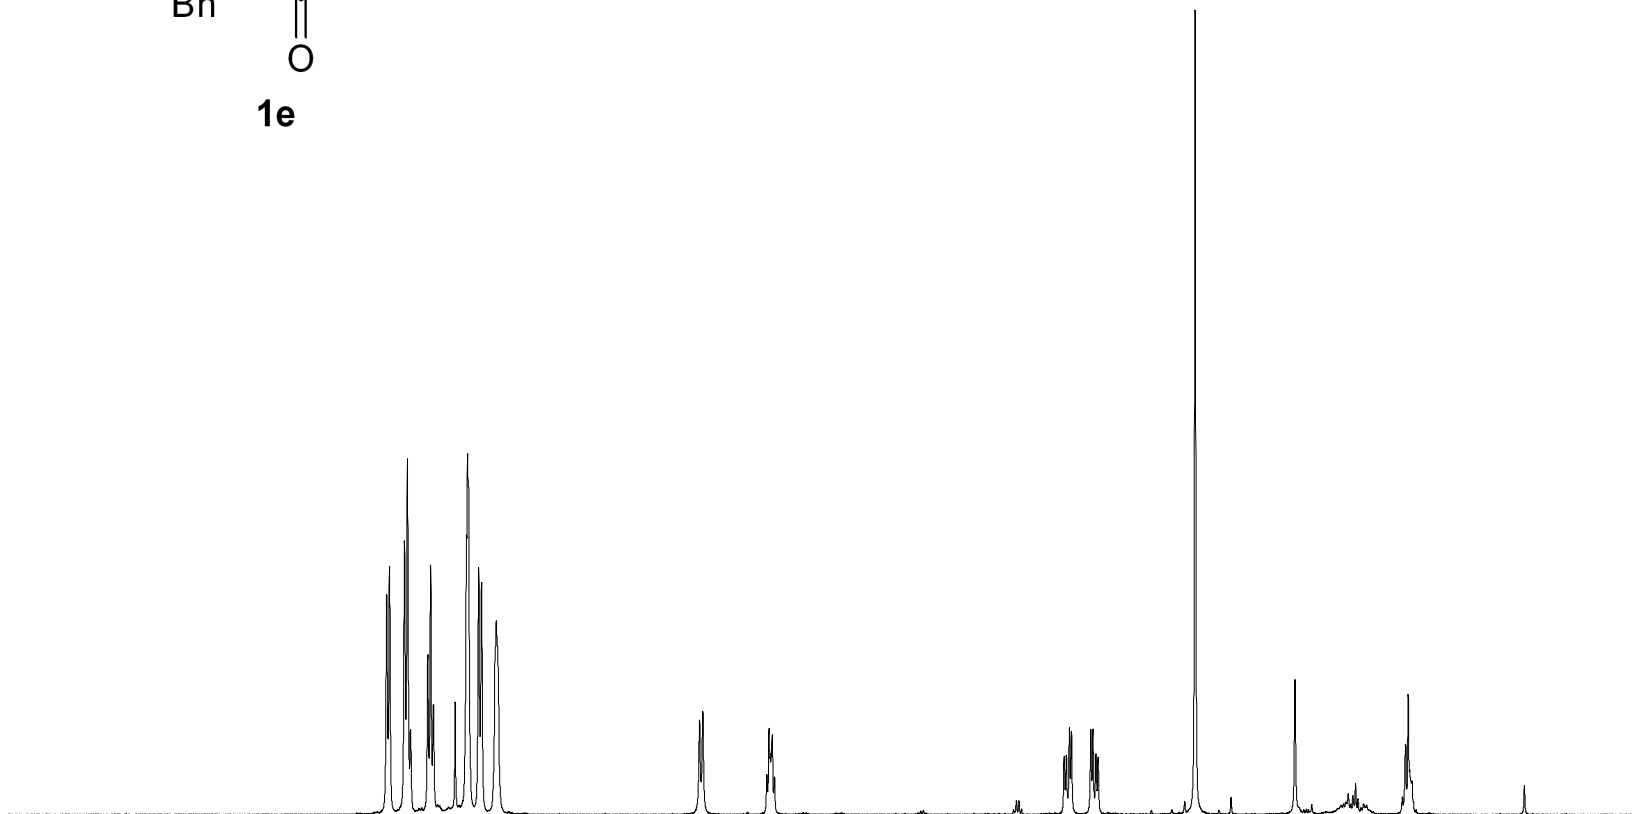

10 9 8 7 6 5 4 3 2 1 0 ppm

2.01  
3.00  
2.01  
3.08  
2.07  
2.07

0.98

1.01

1.01

1.01

3.01

Current Data Parameters  
NAME qh-11112  
EXPNO 1  
PROCNO 1

F2 - Acquisition Parameters  
Date\_ 20150106  
Time 14.30  
INSTRUM spect  
PROBHD 5 mm DUL 13C-1  
PULPROG zg30  
TD 65536  
SOLVENT CDC13  
NS 1  
DS 0  
SWH 8012.820 Hz  
FIDRES 0.122266 Hz  
AQ 4.0894465 sec  
RG 88.84  
DW 62.400 usec  
DE 6.50 usec  
TE 295.8 K  
D1 1.00000000 sec  
TD0 1

==== CHANNEL f1 =====  
SF01 400.1324710 MHz  
NUC1 1H  
P1 14.30 usec  
PLW1 9.10000038 W

F2 - Processing parameters  
SI 65536  
SF 400.1300096 MHz  
WDW EM  
SSB 0  
LB 0.30 Hz  
GB 0  
PC 1.00

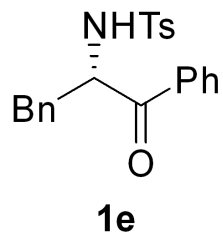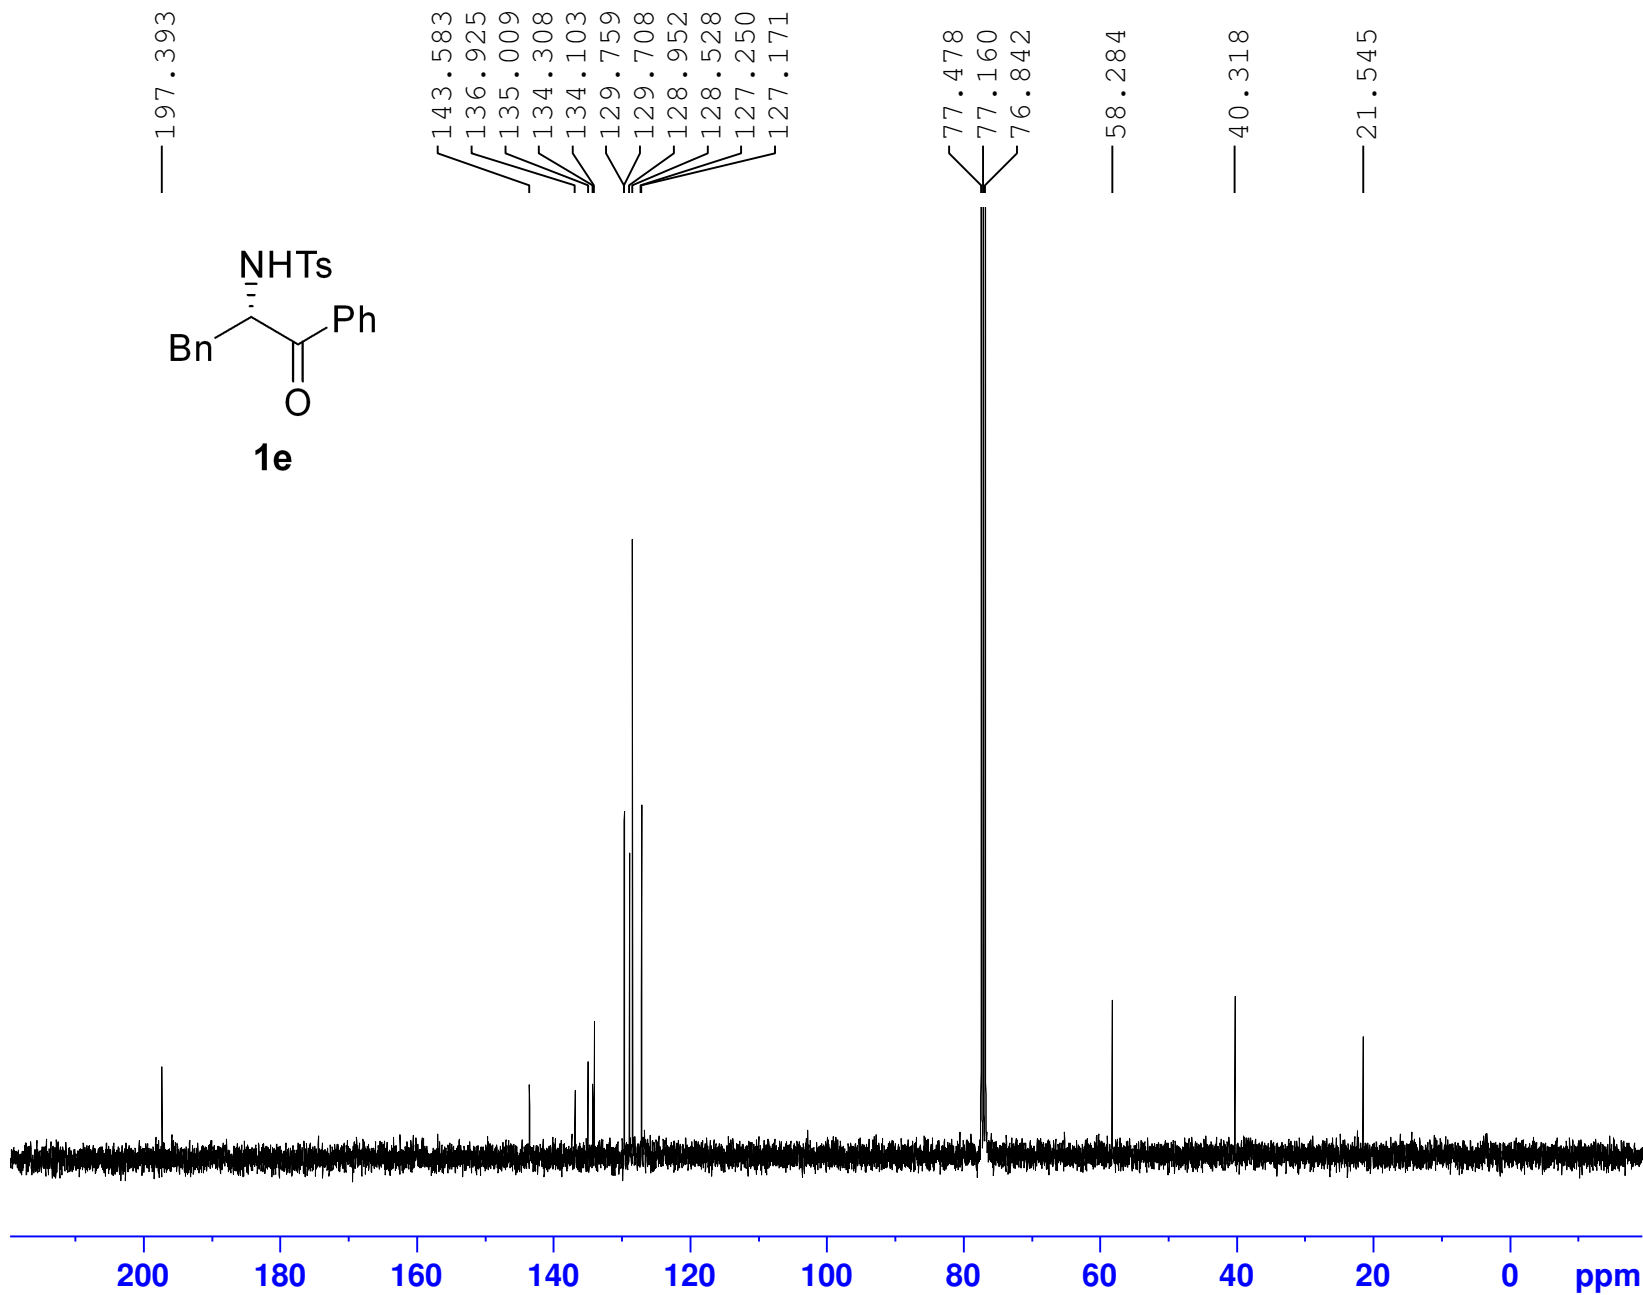

Current Data Parameters  
NAME qh-11112  
EXPNO 2  
PROCNO 1

F2 - Acquisition Parameters  
Date\_ 20150106  
Time 14.33  
INSTRUM spect  
PROBHD 5 mm DUL 13C-1  
PULPROG zgpg30  
TD 65536  
SOLVENT CDC13  
NS 112  
DS 2  
SWH 24038.461 Hz  
FIDRES 0.366798 Hz  
AQ 1.3631488 sec  
RG 196.92  
DW 20.800 usec  
DE 6.50 usec  
TE 296.4 K  
D1 2.00000000 sec  
D11 0.03000000 sec  
TD0 1

==== CHANNEL f1 =====  
SFO1 100.6228298 MHz  
NUC1 13C  
P1 9.60 usec  
PLW1 31.98900032 W

==== CHANNEL f2 =====  
SFO2 400.1316005 MHz  
NUC2 1H  
CPDPRG[2] waltz16  
PCPD2 90.00 usec  
PLW2 9.10000038 W  
PLW12 0.24608000 W  
PLW13 0.19933000 W

F2 - Processing parameters  
SI 32768  
SF 100.6127575 MHz  
WDW EM  
SSB 0  
LB 1.00 Hz  
GB 0  
PC 1.40

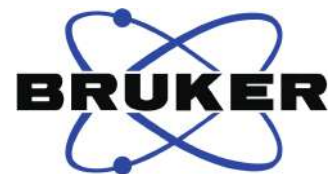

Current Data Parameters  
NAME ss-qh-11142  
EXPNO 1  
PROCNO 1

F2 - Acquisition Parameters  
Date\_ 20200811  
Time 20.07  
INSTRUM spect  
PROBHD 5 mm PABBO BB/  
PULPROG zg30  
TD 65536  
SOLVENT CDCl3  
NS 6  
DS 0  
SWH 8012.820 Hz  
FIDRES 0.122266 Hz  
AQ 4.0894465 sec  
RG 27.78  
DW 62.400 usec  
DE 6.50 usec  
TE 297.7 K  
D1 1.00000000 sec  
TD0 1

===== CHANNEL f1 =====  
SF01 400.1324710 MHz  
NUC1 1H  
P1 14.50 usec  
PLW1 11.99499989 W

F2 - Processing parameters  
SI 65536  
SF 400.1300096 MHz  
WDW EM  
SSB 0  
LB 0.30 Hz  
GB 0  
PC 1.00

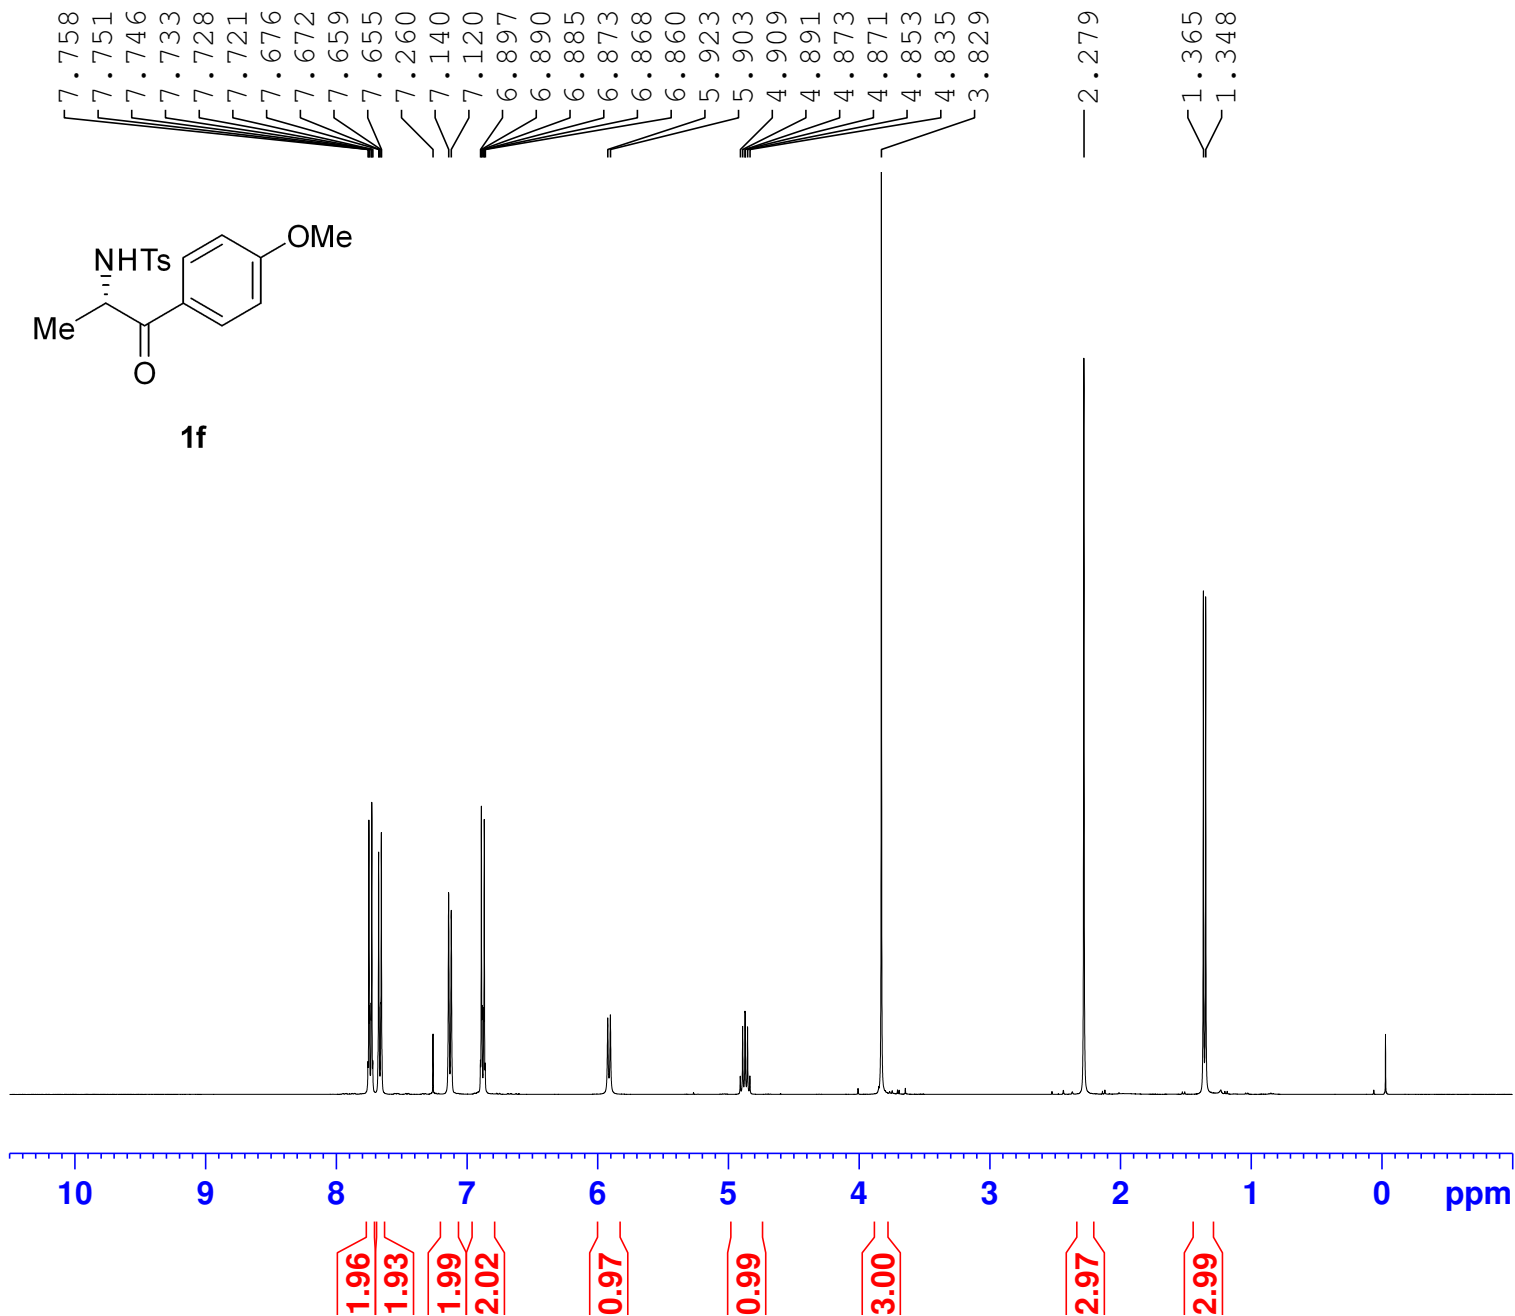

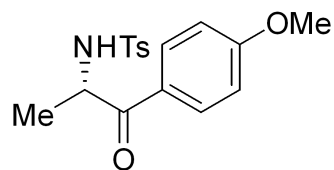

1f

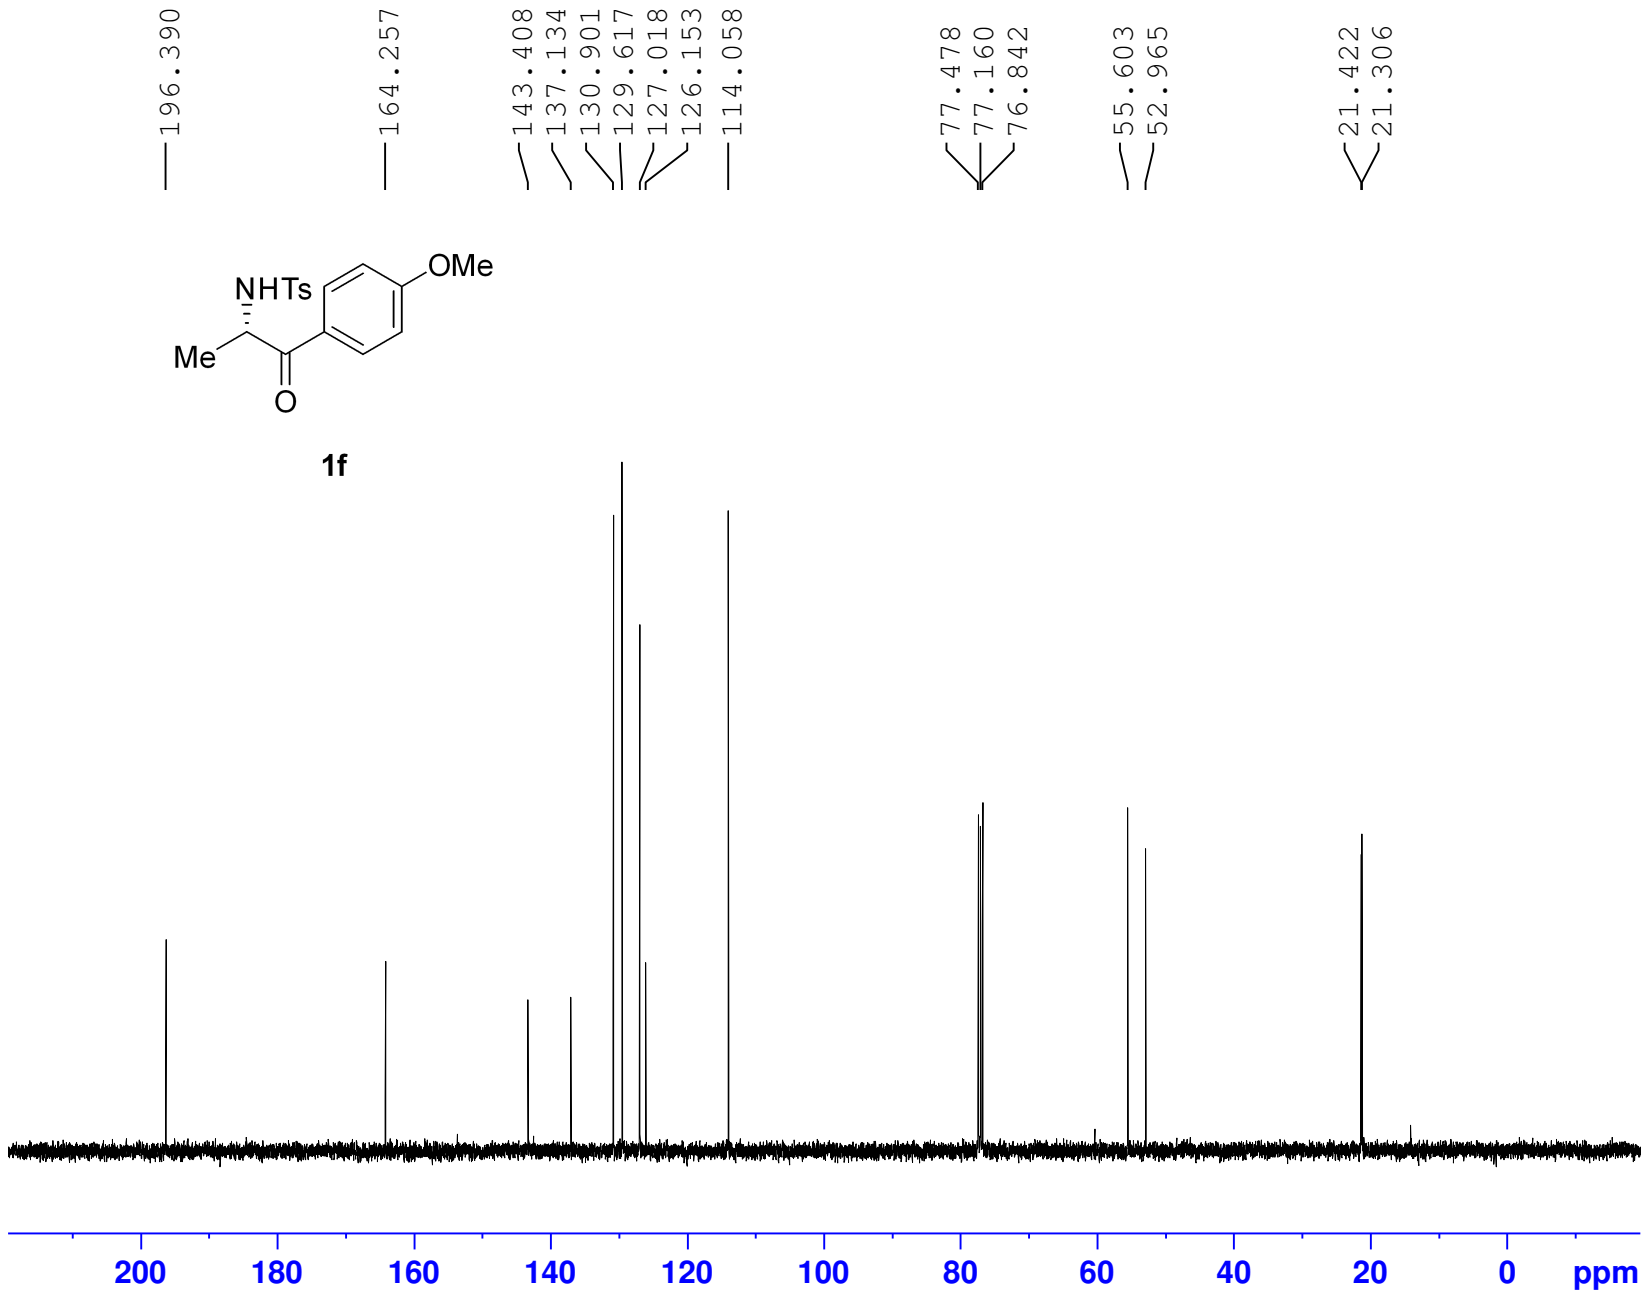

Current Data Parameters  
NAME qh-11142  
EXPNO 2  
PROCNO 1

F2 - Acquisition Parameters  
Date\_ 20150119  
Time 12.19  
INSTRUM spect  
PROBHD 5 mm DUL 13C-1  
PULPROG zgpg30  
TD 65536  
SOLVENT CDC13  
NS 16  
DS 2  
SWH 24038.461 Hz  
FIDRES 0.366798 Hz  
AQ 1.3631488 sec  
RG 196.92  
DW 20.800 usec  
DE 6.50 usec  
TE 296.1 K  
D1 2.00000000 sec  
D11 0.03000000 sec  
TD0 1

==== CHANNEL f1 =====  
SFO1 100.6228298 MHz  
NUC1 13C  
P1 9.60 usec  
PLW1 31.98900032 W

==== CHANNEL f2 =====  
SFO2 400.1316005 MHz  
NUC2 1H  
CPDPRG[2] waltz16  
PCPD2 90.00 usec  
PLW2 9.10000038 W  
PLW12 0.24608000 W  
PLW13 0.19933000 W

F2 - Processing parameters  
SI 32768  
SF 100.6127696 MHz  
WDW EM  
SSB 0  
LB 1.00 Hz  
GB 0  
PC 1.40



Current Data Parameters  
NAME ss-qh-11147  
EXPNO 1  
PROCNO 1

F2 - Acquisition Parameters  
Date\_ 20200811  
Time 20.09  
INSTRUM spect  
PROBHD 5 mm PABBO BB/  
PULPROG zg30  
TD 65536  
SOLVENT CDC13  
NS 6  
DS 0  
SWH 8012.820 Hz  
FIDRES 0.122266 Hz  
AQ 4.0894465 sec  
RG 27.78  
DW 62.400 usec  
DE 6.50 usec  
TE 297.6 K  
D1 1.00000000 sec  
TD0 1

==== CHANNEL f1 =====  
SFO1 400.1324710 MHz  
NUC1 1H  
P1 14.50 usec  
PLW1 11.99499989 W

F2 - Processing parameters  
SI 65536  
SF 400.1300016 MHz  
WDW EM  
SSB 0  
LB 0.30 Hz  
GB 0  
PC 1.00

7.712  
7.708  
7.691  
7.355  
7.349  
7.345  
7.326  
7.288  
7.283  
7.179  
7.159  
7.139  
7.132  
7.128  
7.126  
7.121  
7.116  
7.109  
7.109  
5.938  
5.918  
4.968  
4.950  
4.947  
4.929  
4.911  
4.894  
3.820  
  
— 2.318  
1.398  
1.395  
1.385  
1.380  
1.377

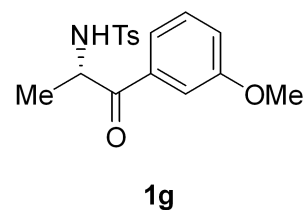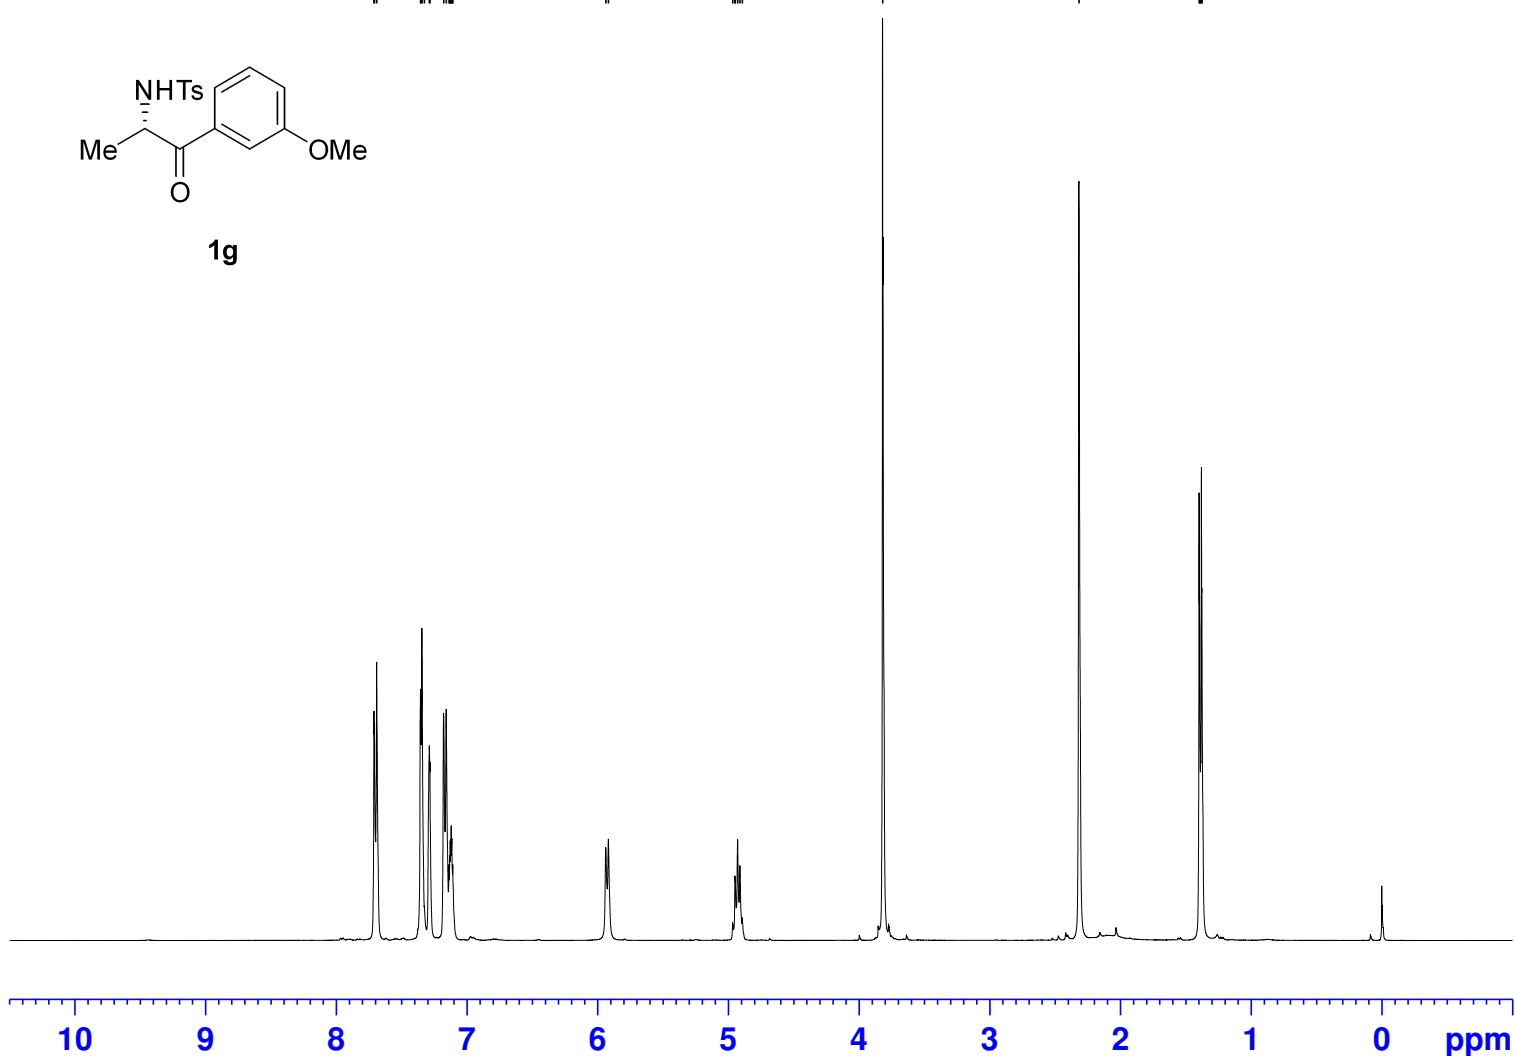

1.94  
2.01  
1.12  
2.96  
0.97  
0.99  
3.12  
3.00  
3.01

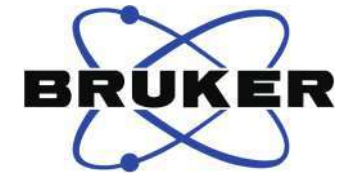

— 198.123

— 160.038

143.625  
137.159  
134.831  
129.953  
129.787  
127.146  
121.024  
120.587  
112.924

77.476  
77.159  
76.841

55.605  
53.580

21.549  
21.288

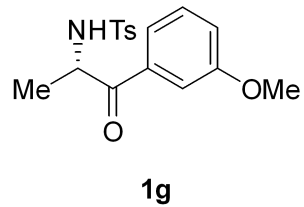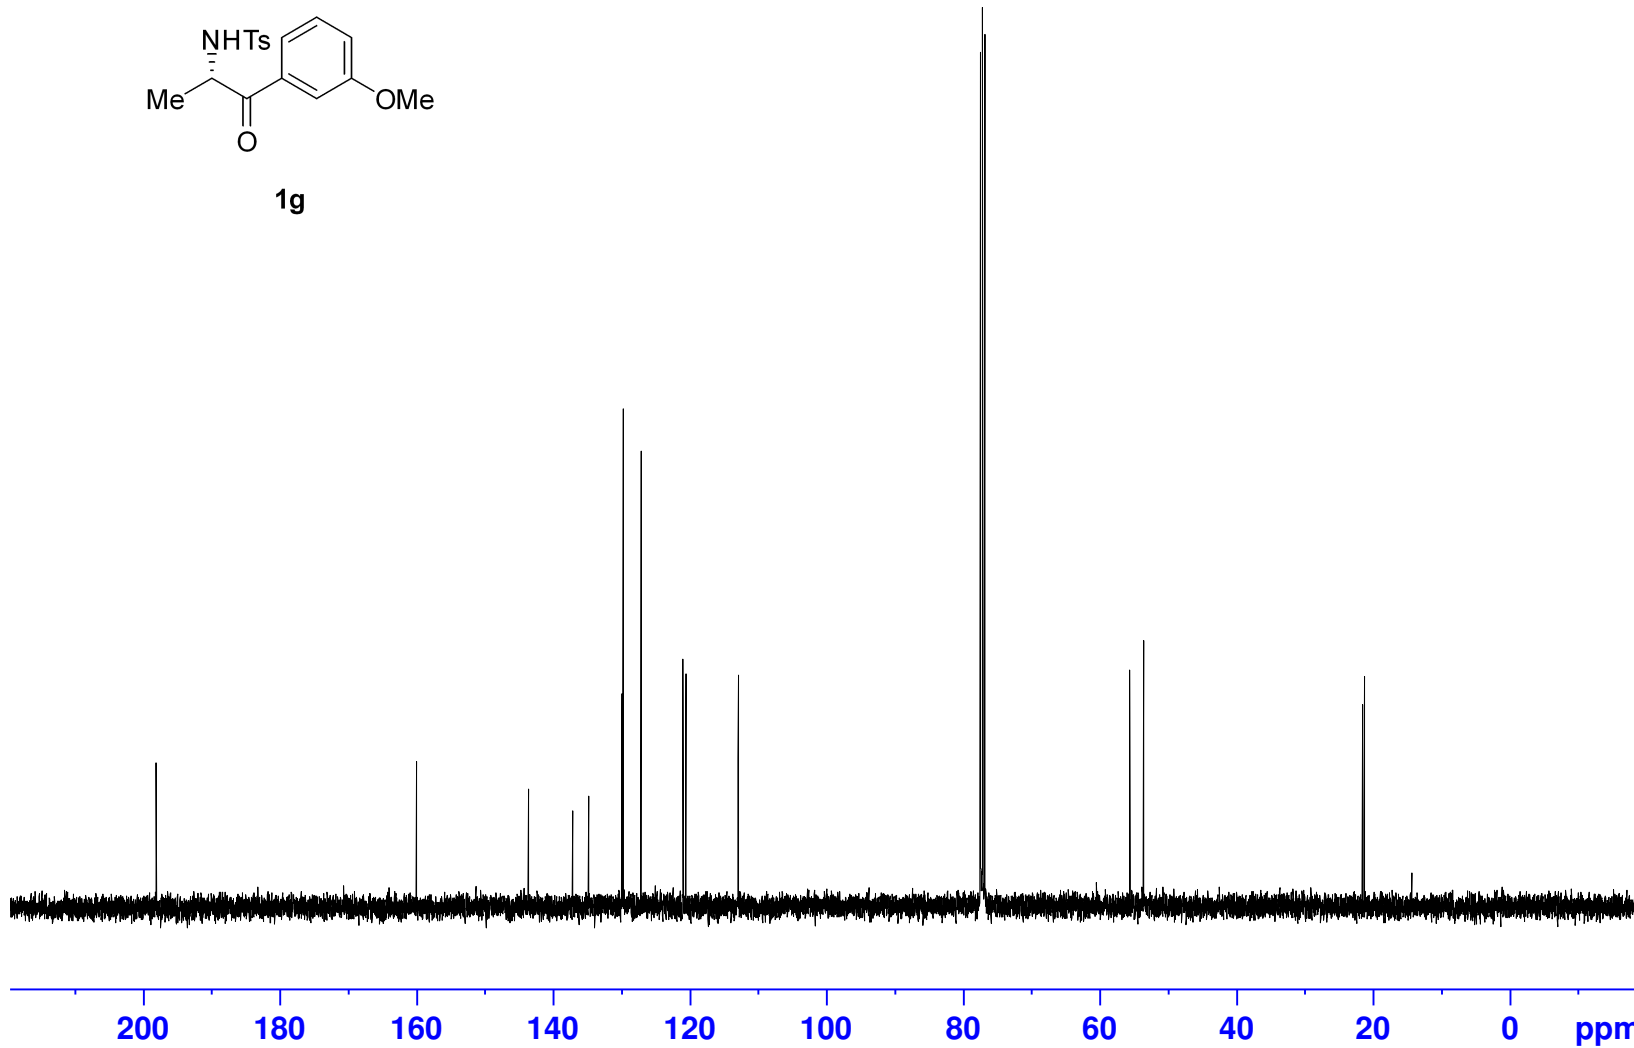

Current Data Parameters  
NAME qh-11147  
EXPNO 2  
PROCNO 1

F2 - Acquisition Parameters  
Date\_ 20150121  
Time 16.08  
INSTRUM spect  
PROBHD 5 mm DUL 13C-1  
PULPROG zgpg30  
TD 65536  
SOLVENT CDC13  
NS 77  
DS 2  
SWH 24038.461 Hz  
FIDRES 0.366798 Hz  
AQ 1.3631488 sec  
RG 196.92  
DW 20.800 usec  
DE 6.50 usec  
TE 296.4 K  
D1 2.0000000 sec  
D11 0.0300000 sec  
TD0 1

==== CHANNEL f1 =====  
SFO1 100.6228298 MHz  
NUC1 13C  
P1 9.60 usec  
PLW1 31.98900032 W

==== CHANNEL f2 =====  
SFO2 400.1316005 MHz  
NUC2 1H  
CPDPRG[2] waltz16  
PCPD2 90.00 usec  
PLW2 9.10000038 W  
PLW12 0.24608000 W  
PLW13 0.19933000 W

F2 - Processing parameters  
SI 32768  
SF 100.6127590 MHz  
WDW EM  
SSB 0  
LB 1.00 Hz  
GB 0  
PC 1.40



Current Data Parameters  
NAME ss-qh-11146  
EXPNO 1  
PROCNO 1

F2 - Acquisition Parameters  
Date\_ 20200811  
Time 20.24  
INSTRUM spect  
PROBHD 5 mm PABBO BB/  
PULPROG zg30  
TD 65536  
SOLVENT CDC13  
NS 9  
DS 0  
SWH 8012.820 Hz  
FIDRES 0.122266 Hz  
AQ 4.0894465 sec  
RG 34.77  
DW 62.400 usec  
DE 6.50 usec  
TE 297.2 K  
D1 1.00000000 sec  
TD0 1

==== CHANNEL f1 =====  
SFO1 400.1324710 MHz  
NUC1 1H  
P1 14.50 usec  
PLW1 11.99499989 W

F2 - Processing parameters  
SI 65536  
SF 400.1300099 MHz  
WDW EM  
SSB 0  
LB 0.30 Hz  
GB 0  
PC 1.00

7.734  
7.728  
7.723  
7.711  
7.707  
7.701  
7.690  
7.670  
7.418  
7.412  
7.407  
7.395  
7.390  
7.384  
7.260  
7.173  
7.153  
5.832  
5.812  
4.932  
4.914  
4.896  
4.894  
4.876  
4.858

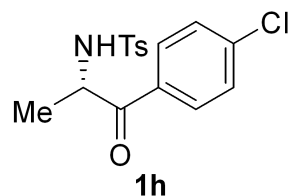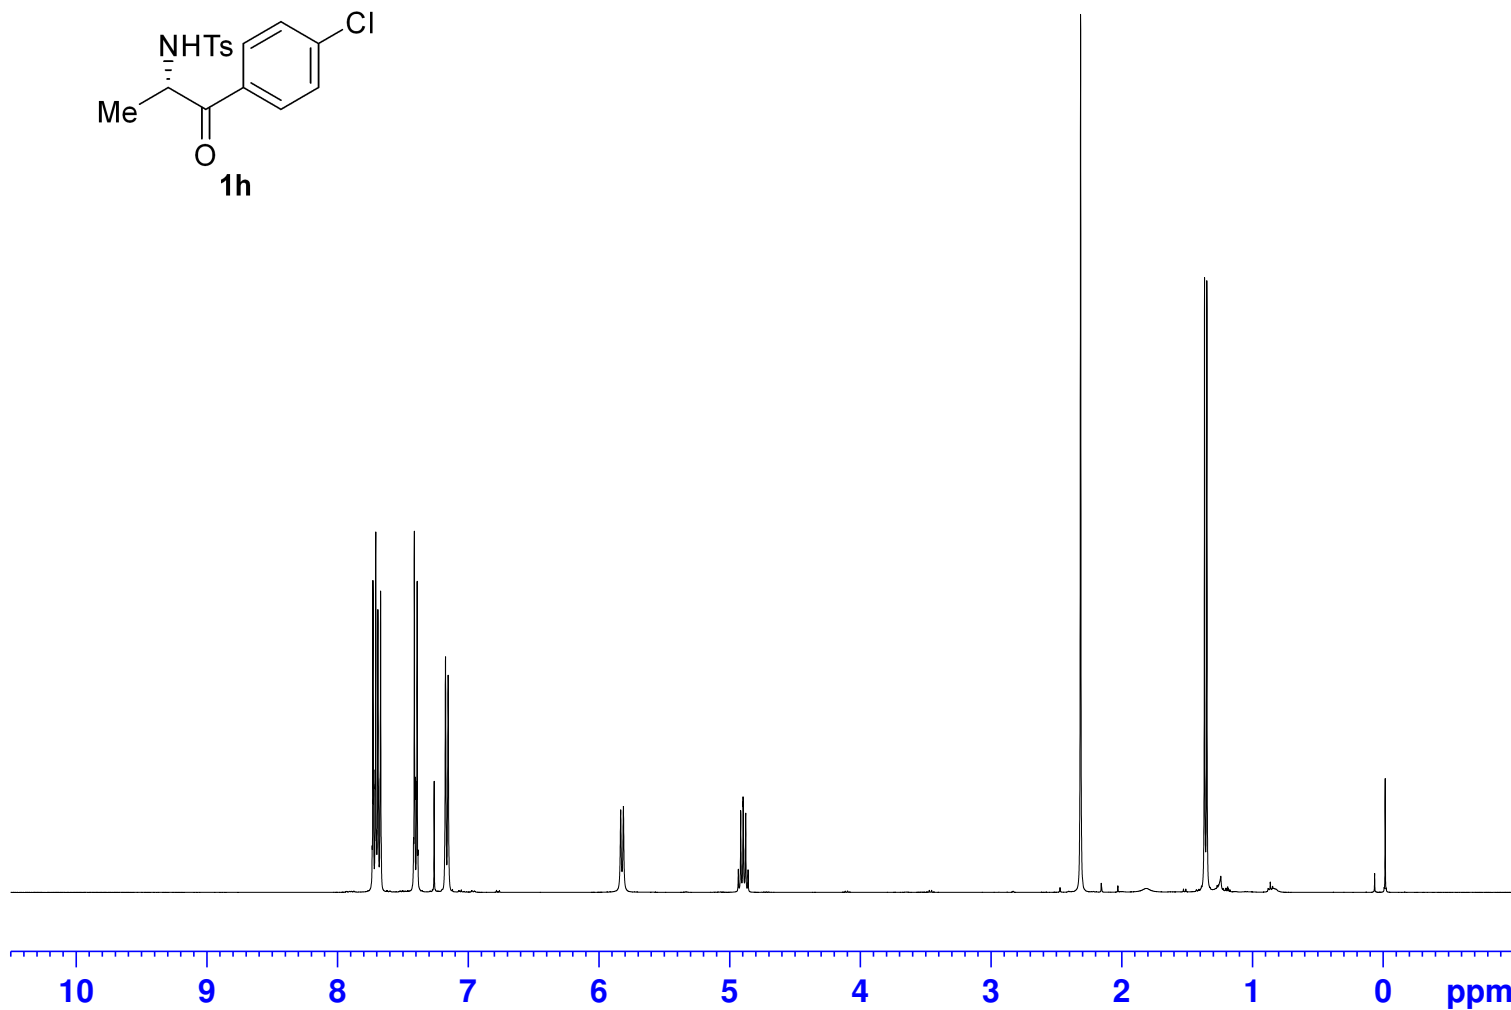



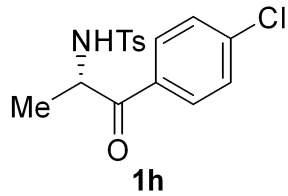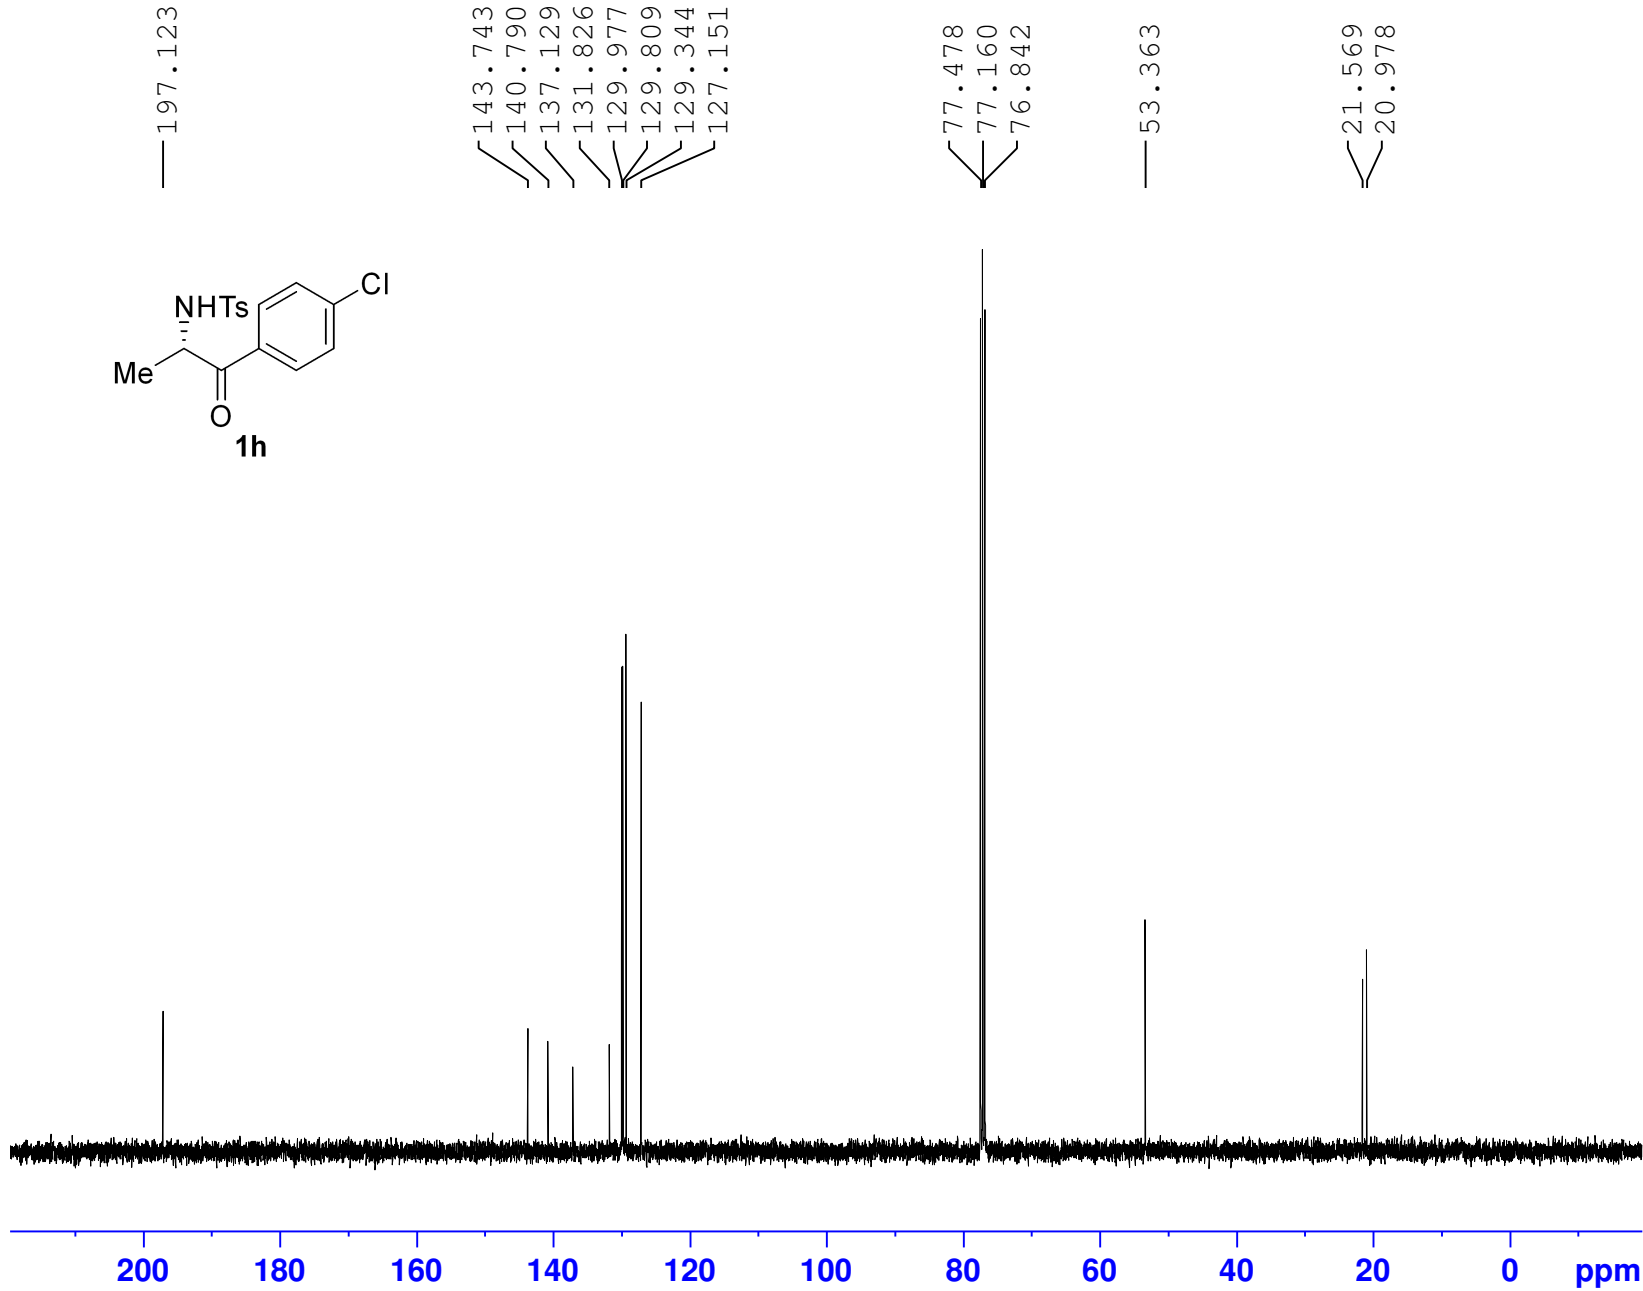

Current Data Parameters  
NAME qh-11146  
EXPNO 2  
PROCNO 1

F2 - Acquisition Parameters  
Date\_ 20150121  
Time 16.00  
INSTRUM spect  
PROBHD 5 mm DUL 13C-1  
PULPROG zgpg30  
TD 65536  
SOLVENT CDC13  
NS 70  
DS 2  
SWH 24038.461 Hz  
FIDRES 0.366798 Hz  
AQ 1.3631488 sec  
RG 196.92  
DW 20.800 usec  
DE 6.50 usec  
TE 296.3 K  
D1 2.00000000 sec  
D11 0.03000000 sec  
TD0 1

==== CHANNEL f1 =====  
SFO1 100.6228298 MHz  
NUC1 13C  
P1 9.60 usec  
PLW1 31.98900032 W

==== CHANNEL f2 =====  
SFO2 400.1316005 MHz  
NUC2 1H  
CPDPRG[2] waltz16  
PCPD2 90.00 usec  
PLW2 9.10000038 W  
PLW12 0.24608000 W  
PLW13 0.19933000 W

F2 - Processing parameters  
SI 32768  
SF 100.6127590 MHz  
WDW EM  
SSB 0  
LB 1.00 Hz  
GB 0  
PC 1.40

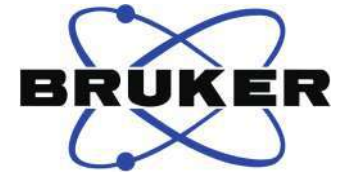

7.830  
7.824  
7.816  
7.812  
7.807  
7.799  
7.794  
7.691  
7.670  
7.260  
7.174  
7.154  
7.130  
7.125  
7.109  
7.092  
7.087  
5.816  
5.796  
4.937  
4.919  
4.901  
4.899  
4.881  
4.863

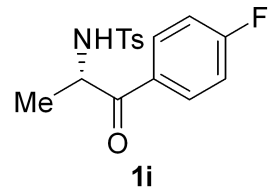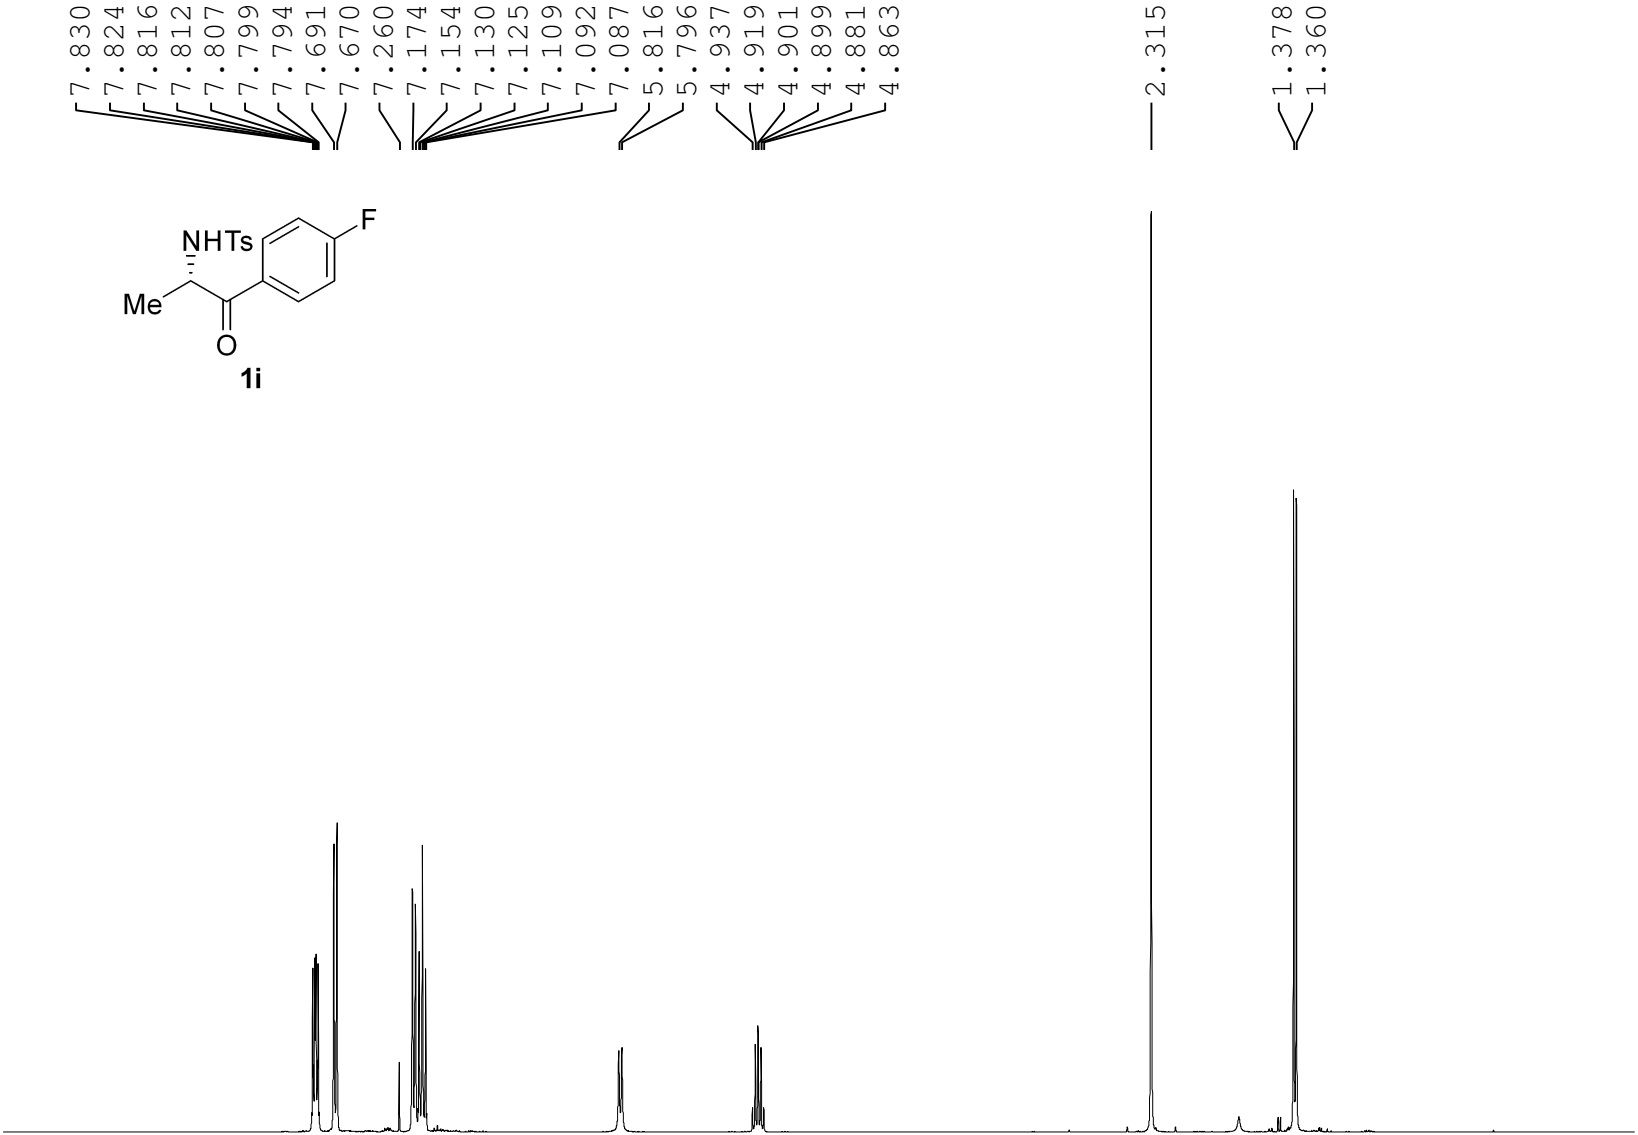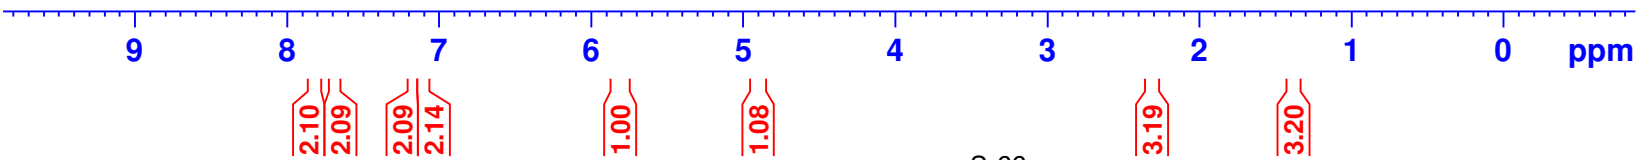

Current Data Parameters  
NAME qh-11130  
EXPNO 3  
PROCNO 1

F2 - Acquisition Parameters  
Date\_ 20150113  
Time 13.49  
INSTRUM spect  
PROBHD 5 mm DUL 13C-1  
PULPROG zg30  
TD 65536  
SOLVENT CDC13  
NS 2  
DS 0  
SWH 8012.820 Hz  
FIDRES 0.122266 Hz  
AQ 4.0894465 sec  
RG 62.93  
DW 62.400 usec  
DE 6.50 usec  
TE 295.6 K  
D1 1.00000000 sec  
TD0 1

==== CHANNEL f1 =====  
SFO1 400.1324710 MHz  
NUC1 1H  
P1 14.30 usec  
PLW1 9.10000038 W

F2 - Processing parameters  
SI 65536  
SF 400.1300095 MHz  
WDW EM  
SSB 0  
LB 0.30 Hz  
GB 0  
PC 1.00

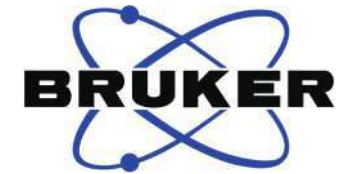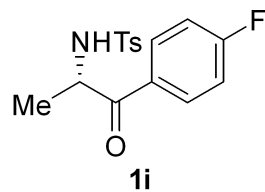

— 196.686  
 < 167.580  
 < 165.027  
 < 143.693  
 < 137.150  
 < 131.394  
 < 131.299  
 < 129.931  
 < 129.902  
 < 129.774  
 < 127.156  
 < 116.328  
 < 116.109

< 77.479  
 < 77.161  
 < 76.843

— 53.294

< 21.543  
 < 21.028

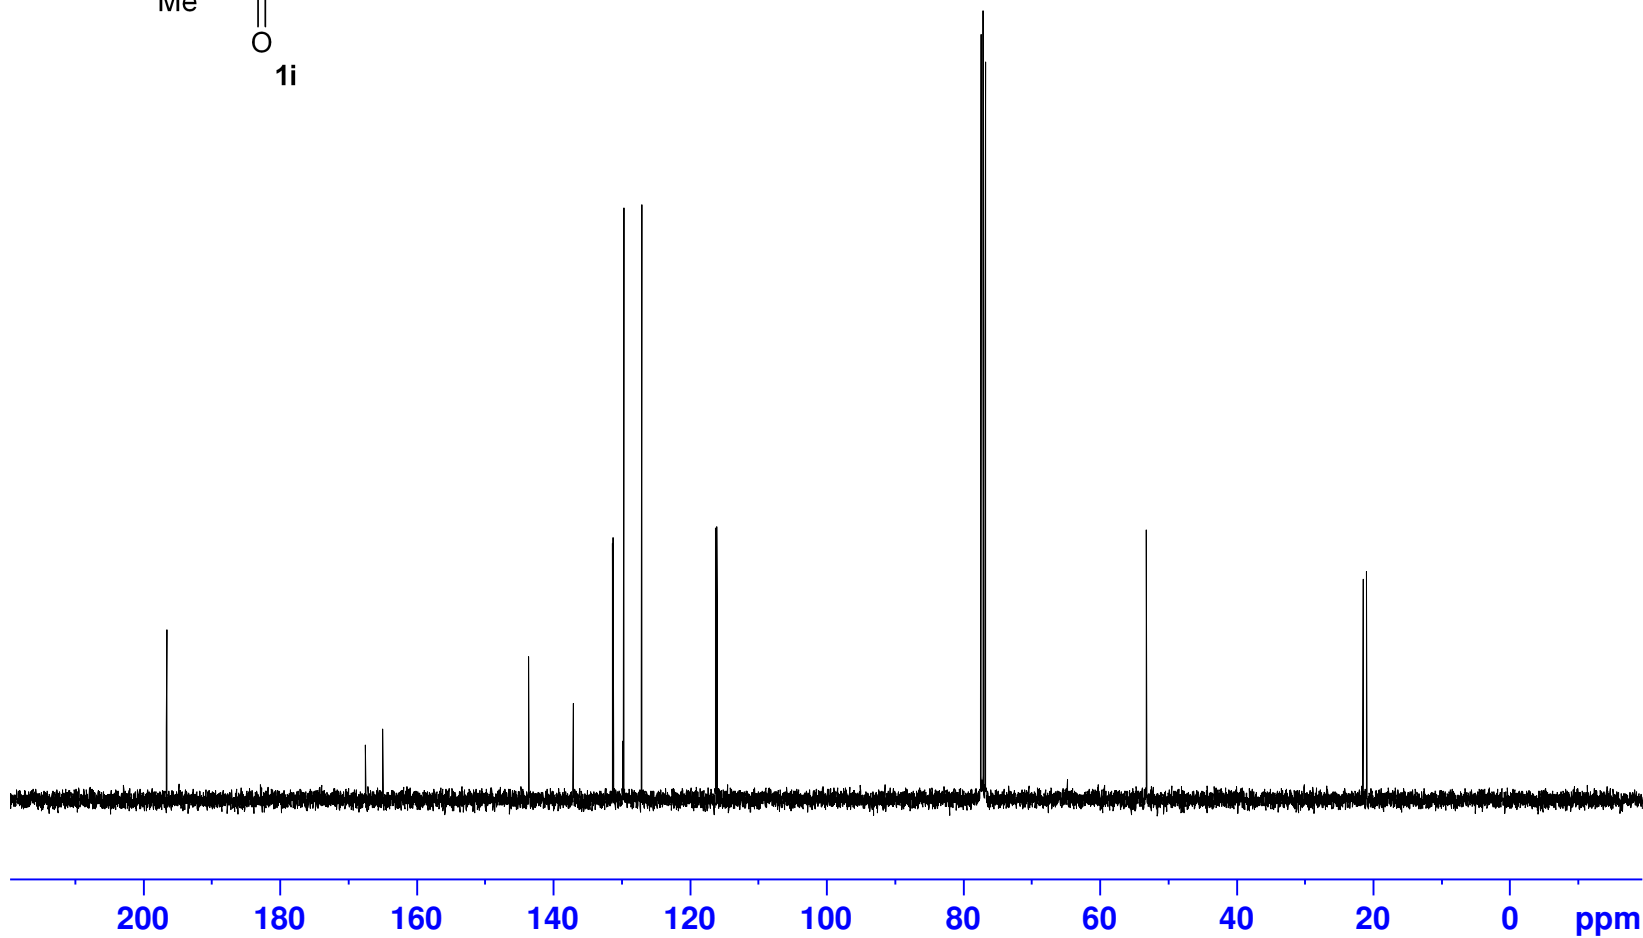

Current Data Parameters  
 NAME qh-11130  
 EXPNO 4  
 PROCNO 1

F2 - Acquisition Parameters  
 Date\_ 20150113  
 Time 13.51  
 INSTRUM spect  
 PROBHD 5 mm DUL 13C-1  
 PULPROG zgpg30  
 TD 65536  
 SOLVENT CDCl3  
 NS 70  
 DS 2  
 SWH 24038.461 Hz  
 FIDRES 0.366798 Hz  
 AQ 1.3631488 sec  
 RG 196.92  
 DW 20.800 usec  
 DE 6.50 usec  
 TE 296.1 K  
 D1 2.00000000 sec  
 D11 0.03000000 sec  
 TD0 1

==== CHANNEL f1 =====  
 SFO1 100.6228298 MHz  
 NUC1 13C  
 P1 9.60 usec  
 PLW1 31.98900032 W

==== CHANNEL f2 =====  
 SFO2 400.1316005 MHz  
 NUC2 1H  
 CPDPRG[2] waltz16  
 PCPD2 90.00 usec  
 PLW2 9.10000038 W  
 PLW12 0.24608000 W  
 PLW13 0.19933000 W

F2 - Processing parameters  
 SI 32768  
 SF 100.6127597 MHz  
 WDW EM  
 SSB 0  
 LB 1.00 Hz  
 GB 0  
 PC 1.40



Current Data Parameters  
NAME qh-11150  
EXPNO 1  
PROCNO 1

F2 - Acquisition Parameters  
Date\_ 20150121  
Time 20.02  
INSTRUM spect  
PROBHD 5 mm DUL 13C-1  
PULPROG zg30  
TD 65536  
SOLVENT CDC13  
NS 2  
DS 0  
SWH 8012.820 Hz  
FIDRES 0.122266 Hz  
AQ 4.0894465 sec  
RG 82.92  
DW 62.400 usec  
DE 6.50 usec  
TE 296.3 K  
D1 1.00000000 sec  
TD0 1

==== CHANNEL f1 =====  
SFO1 400.1324710 MHz  
NUC1 1H  
P1 14.30 usec  
PLW1 9.10000038 W

F2 - Processing parameters  
SI 65536  
SF 400.1300095 MHz  
WDW EM  
SSB 0  
LB 0.30 Hz  
GB 0  
PC 1.00

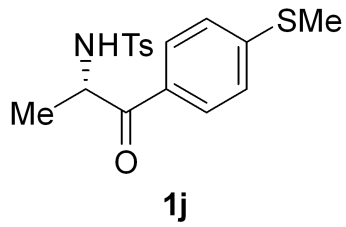

7.681  
7.660  
7.260  
7.230  
7.209  
7.170  
7.150

5.815  
5.795

4.909  
4.891  
4.872  
4.854  
4.836

2.508  
2.315

1.386  
1.369

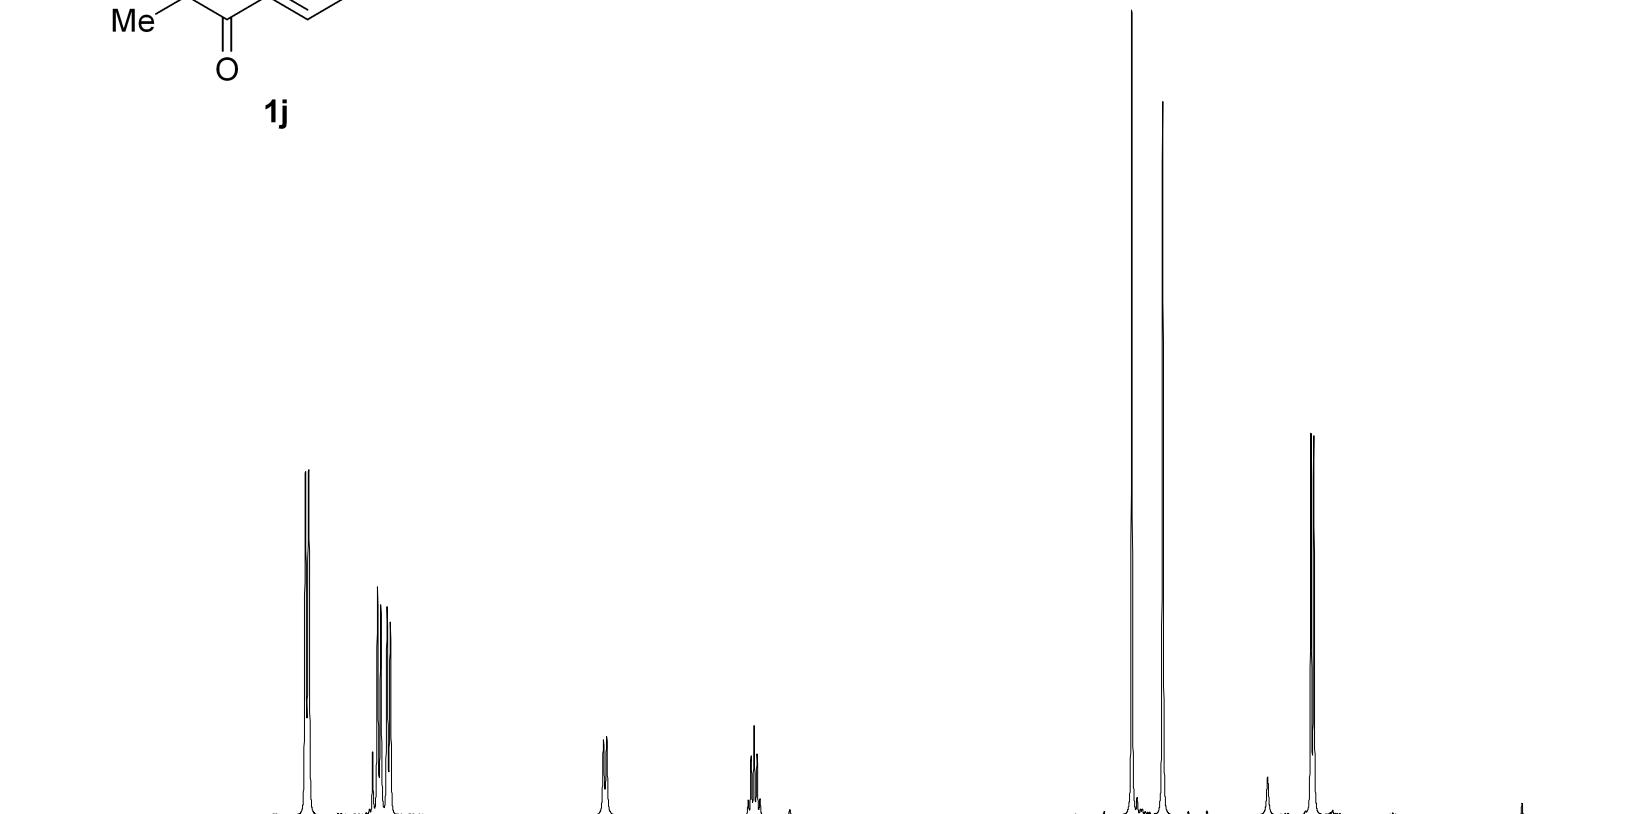

4.00  
2.04  
2.02

0.95

1.01

3.05  
3.03

3.03



— 197.021

147.801  
143.606  
137.200  
129.773  
129.483  
128.949  
127.134  
125.056

77.480  
77.162  
76.845

— 53.220

21.569  
21.383  
14.724

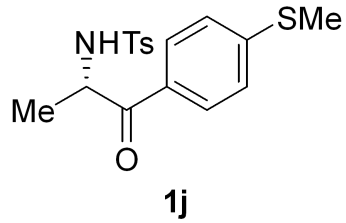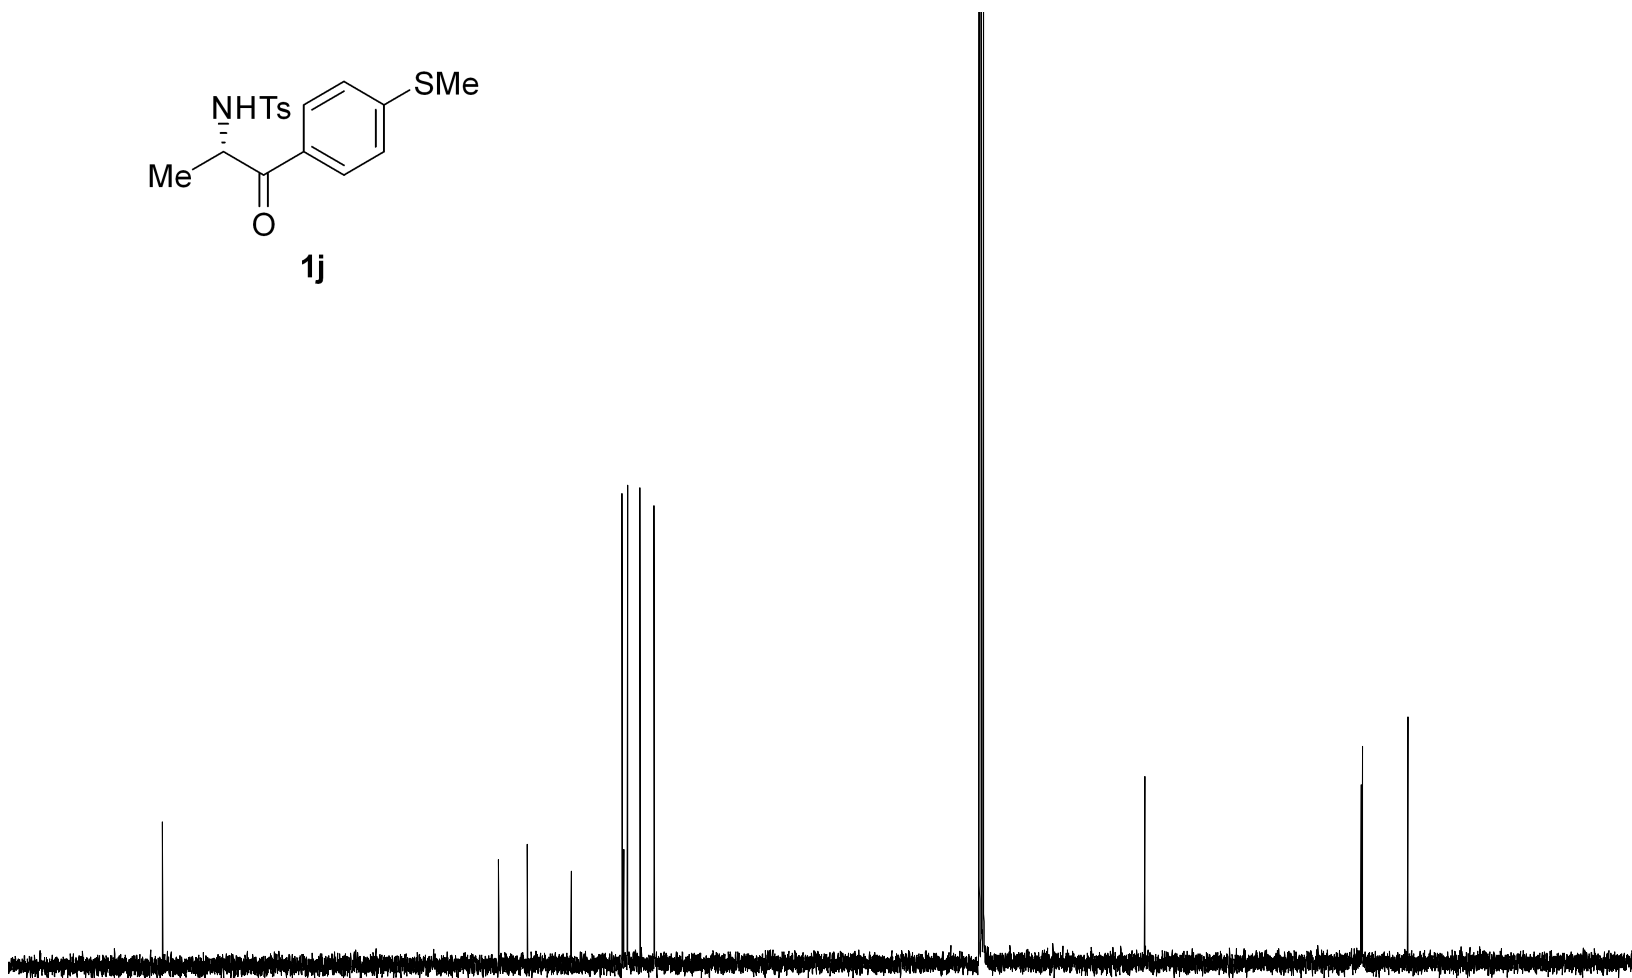

Current Data Parameters  
NAME qh-11150  
EXPNO 2  
PROCNO 1

F2 - Acquisition Parameters  
Date\_ 20150121  
Time 20.07  
INSTRUM spect  
PROBHD 5 mm DUL 13C-1  
PULPROG zgpg30  
TD 65536  
SOLVENT CDC13  
NS 150  
DS 2  
SWH 24038.461 Hz  
FIDRES 0.366798 Hz  
AQ 1.3631488 sec  
RG 196.92  
DW 20.800 usec  
DE 6.50 usec  
TE 296.8 K  
D1 2.00000000 sec  
D11 0.03000000 sec  
TD0 1

==== CHANNEL f1 =====  
SFO1 100.6228298 MHz  
NUC1 13C  
P1 9.60 usec  
PLW1 31.98900032 W

==== CHANNEL f2 =====  
SFO2 400.1316005 MHz  
NUC2 1H  
CPDPRG[2] waltz16  
PCPD2 90.00 usec  
PLW2 9.10000038 W  
PLW12 0.24608000 W  
PLW13 0.19933000 W

F2 - Processing parameters  
SI 32768  
SF 100.6127582 MHz  
WDW EM  
SSB 0  
LB 1.00 Hz  
GB 0  
PC 1.40

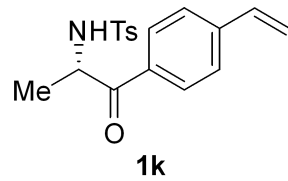

7.739  
7.719  
7.692  
7.672  
7.462  
7.442  
7.260  
7.171  
7.151  
6.768  
6.741  
6.724  
6.697  
5.909  
5.866  
5.806  
5.786  
5.447  
5.420  
4.946  
4.928  
4.910  
4.891  
4.873

2.311  
1.402  
1.384

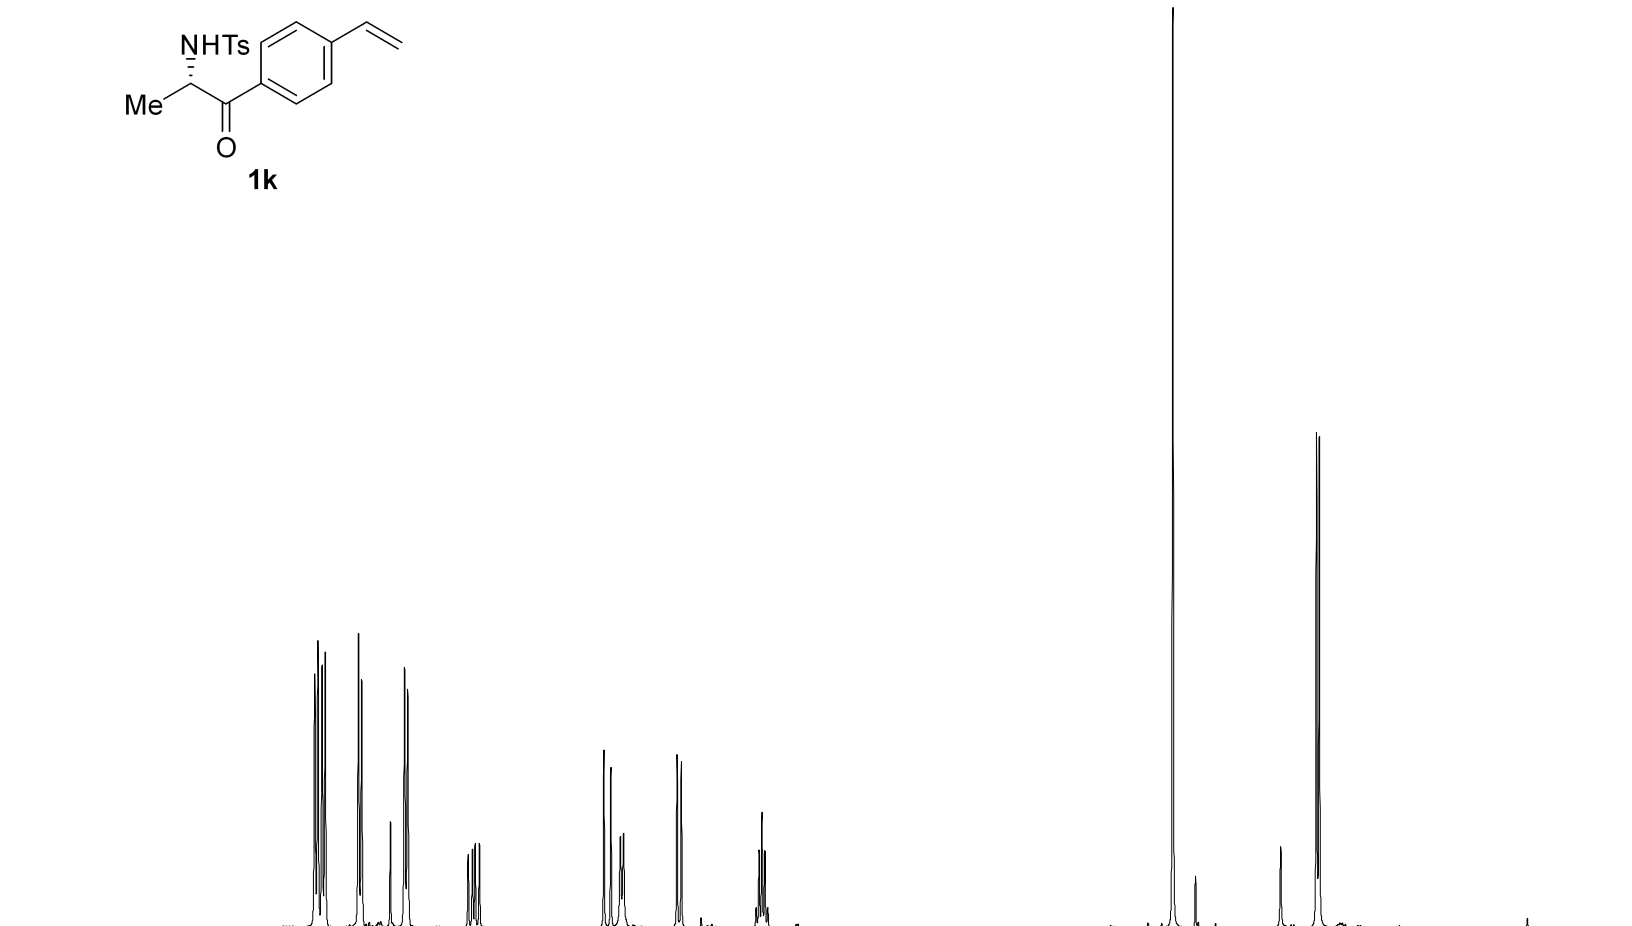

2.03  
2.00  
2.04  
2.02  
1.02

1.02  
0.96  
1.01  
1.03

3.05  
3.06

Current Data Parameters  
NAME qh-11150  
EXPNO 1  
PROCNO 1

F2 - Acquisition Parameters  
Date\_ 20150122  
Time 19.35  
INSTRUM spect  
PROBHD 5 mm DUL 13C-1  
PULPROG zg30  
TD 65536  
SOLVENT CDC13  
NS 4  
DS 0  
SWH 8012.820 Hz  
FIDRES 0.122266 Hz  
AQ 4.0894465 sec  
RG 103.52  
DW 62.400 usec  
DE 6.50 usec  
TE 295.9 K  
D1 1.00000000 sec  
TD0 1

==== CHANNEL f1 =====  
SFO1 400.1324710 MHz  
NUC1 1H  
P1 14.30 usec  
PLW1 9.10000038 W

F2 - Processing parameters  
SI 65536  
SF 400.1300095 MHz  
WDW EM  
SSB 0  
LB 0.30 Hz  
GB 0  
PC 1.00



— 197.532

143.640  
143.232  
137.178  
135.712  
132.504  
129.795  
129.039  
127.160  
126.638  
117.756

77.478  
77.161  
76.843

— 53.424

21.570  
21.328

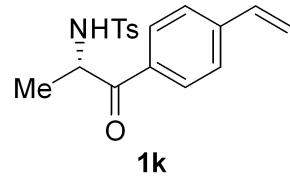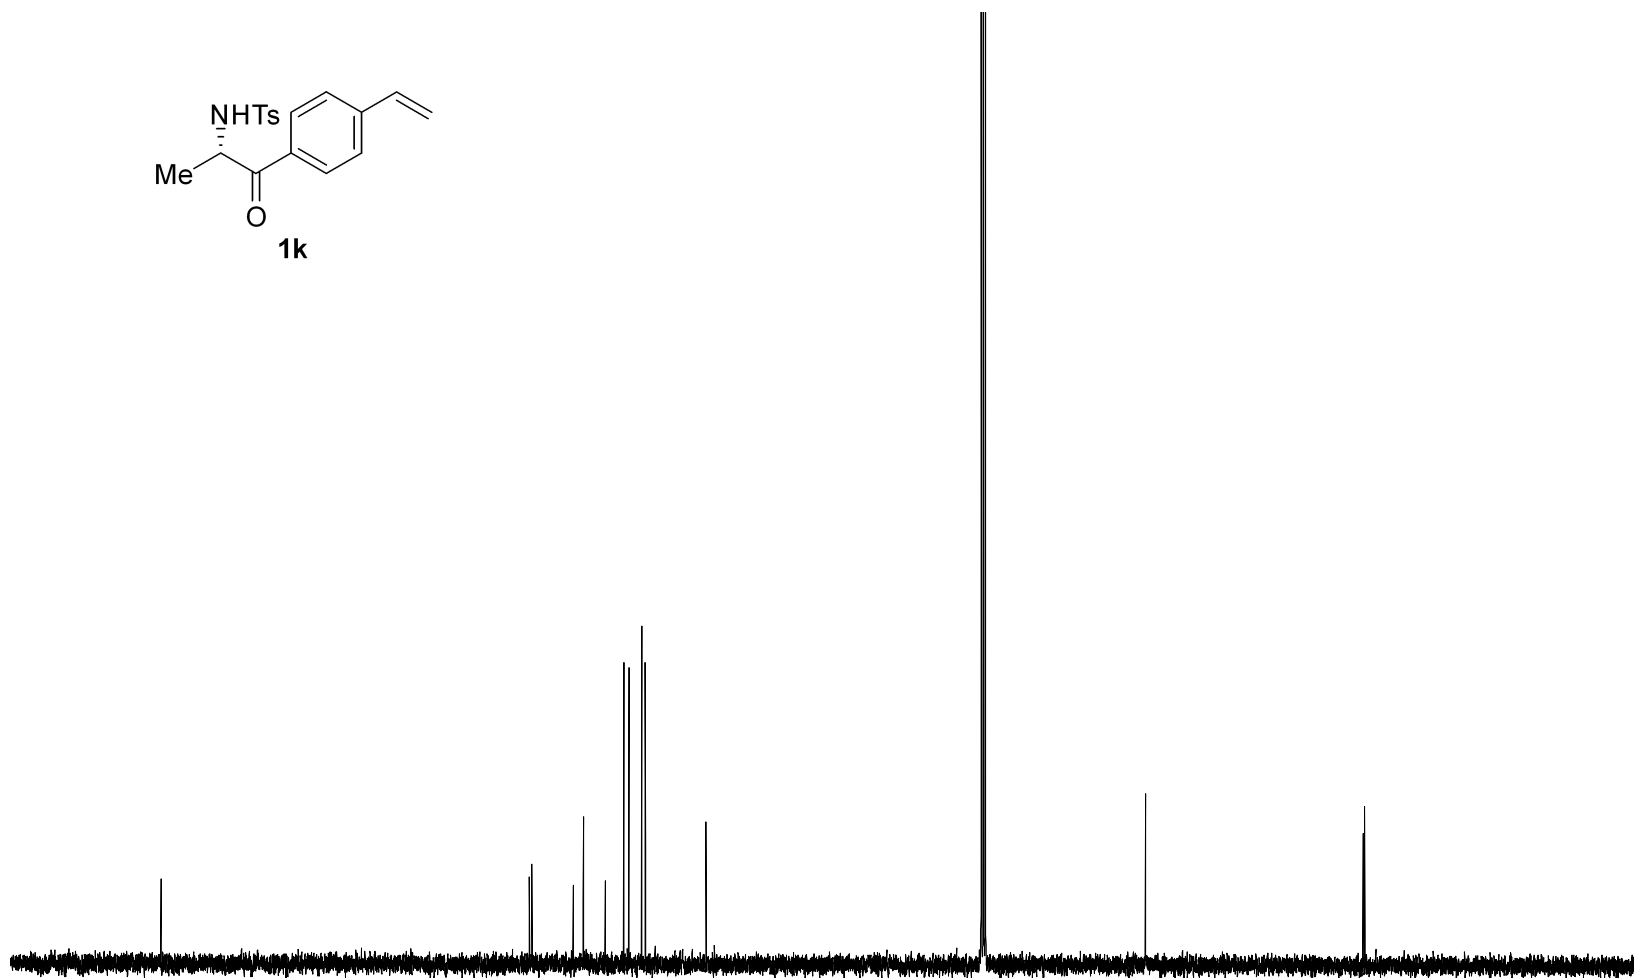

Current Data Parameters  
NAME qh-11150  
EXPNO 2  
PROCNO 1

F2 - Acquisition Parameters  
Date\_ 20150122  
Time 19.38  
INSTRUM spect  
PROBHD 5 mm DUL 13C-1  
PULPROG zgpg30  
TD 65536  
SOLVENT CDC13  
NS 154  
DS 2  
SWH 24038.461 Hz  
FIDRES 0.366798 Hz  
AQ 1.3631488 sec  
RG 196.92  
DW 20.800 usec  
DE 6.50 usec  
TE 296.4 K  
D1 2.00000000 sec  
D11 0.03000000 sec  
TD0 1

==== CHANNEL f1 =====  
SFO1 100.6228298 MHz  
NUC1 13C  
P1 9.60 usec  
PLW1 31.98900032 W

==== CHANNEL f2 =====  
SFO2 400.1316005 MHz  
NUC2 1H  
CPDPRG[2] waltz16  
PCPD2 90.00 usec  
PLW2 9.10000038 W  
PLW12 0.24608000 W  
PLW13 0.19933000 W

F2 - Processing parameters  
SI 32768  
SF 100.6127571 MHz  
WDW EM  
SSB 0  
LB 1.00 Hz  
GB 0  
PC 1.40

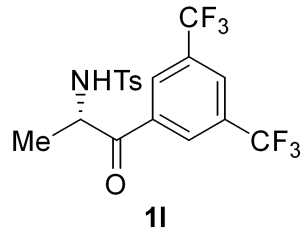

8.215  
8.074  
7.713  
7.693  
7.260  
7.199  
7.180

5.819  
5.798  
5.018  
5.000  
4.981  
4.962  
4.944

2.328

1.392  
1.374

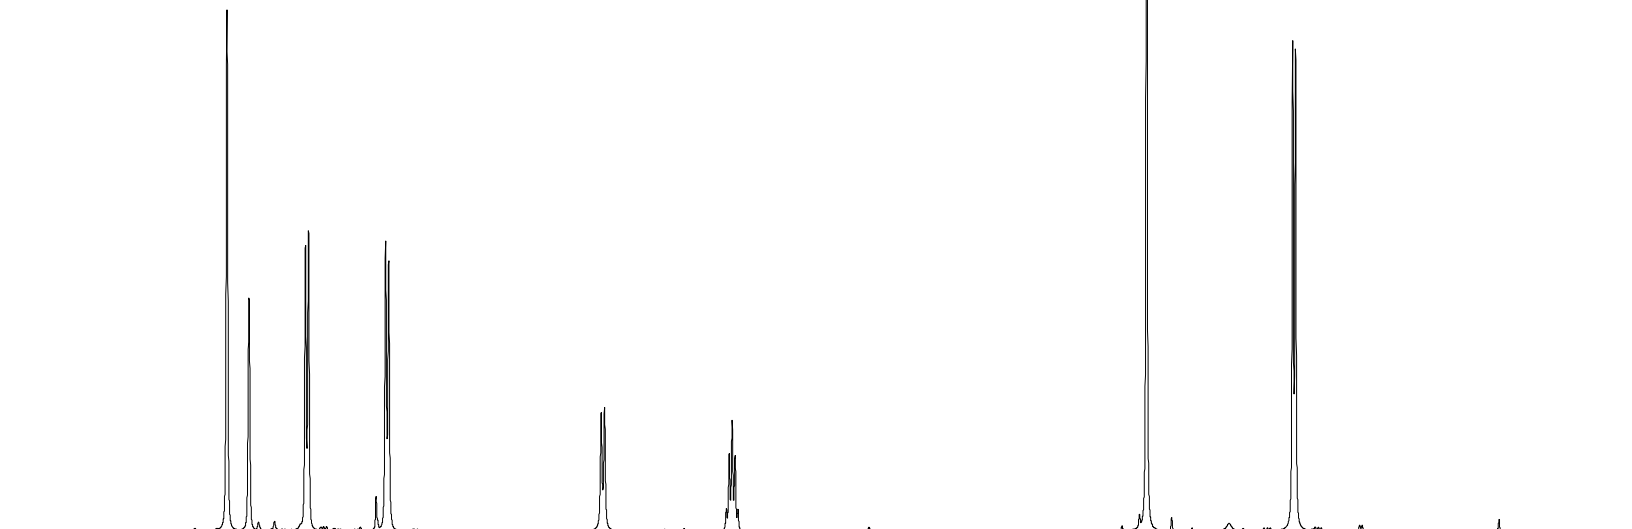

9 8 7 6 5 4 3 2 1 0 ppm

2.03  
1.00  
2.04  
2.04

0.99  
1.02

3.10  
3.07

Current Data Parameters  
NAME qh-11153  
EXPNO 1  
PROCNO 1

F2 - Acquisition Parameters  
Date\_ 20150122  
Time 20.02  
INSTRUM spect  
PROBHD 5 mm DUL 13C-1  
PULPROG zg30  
TD 65536  
SOLVENT CDC13  
NS 16  
DS 0  
SWH 8012.820 Hz  
FIDRES 0.122266 Hz  
AQ 4.0894465 sec  
RG 31.55  
DW 62.400 usec  
DE 6.50 usec  
TE 295.9 K  
D1 1.00000000 sec  
TD0 1

==== CHANNEL f1 =====  
SFO1 400.1324710 MHz  
NUC1 1H  
P1 14.30 usec  
PLW1 9.10000038 W

F2 - Processing parameters  
SI 65536  
SF 400.1300091 MHz  
WDW EM  
SSB 0  
LB 0.30 Hz  
GB 0  
PC 1.00



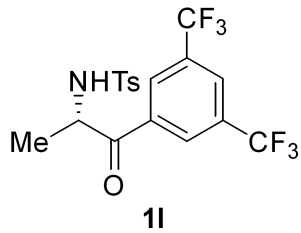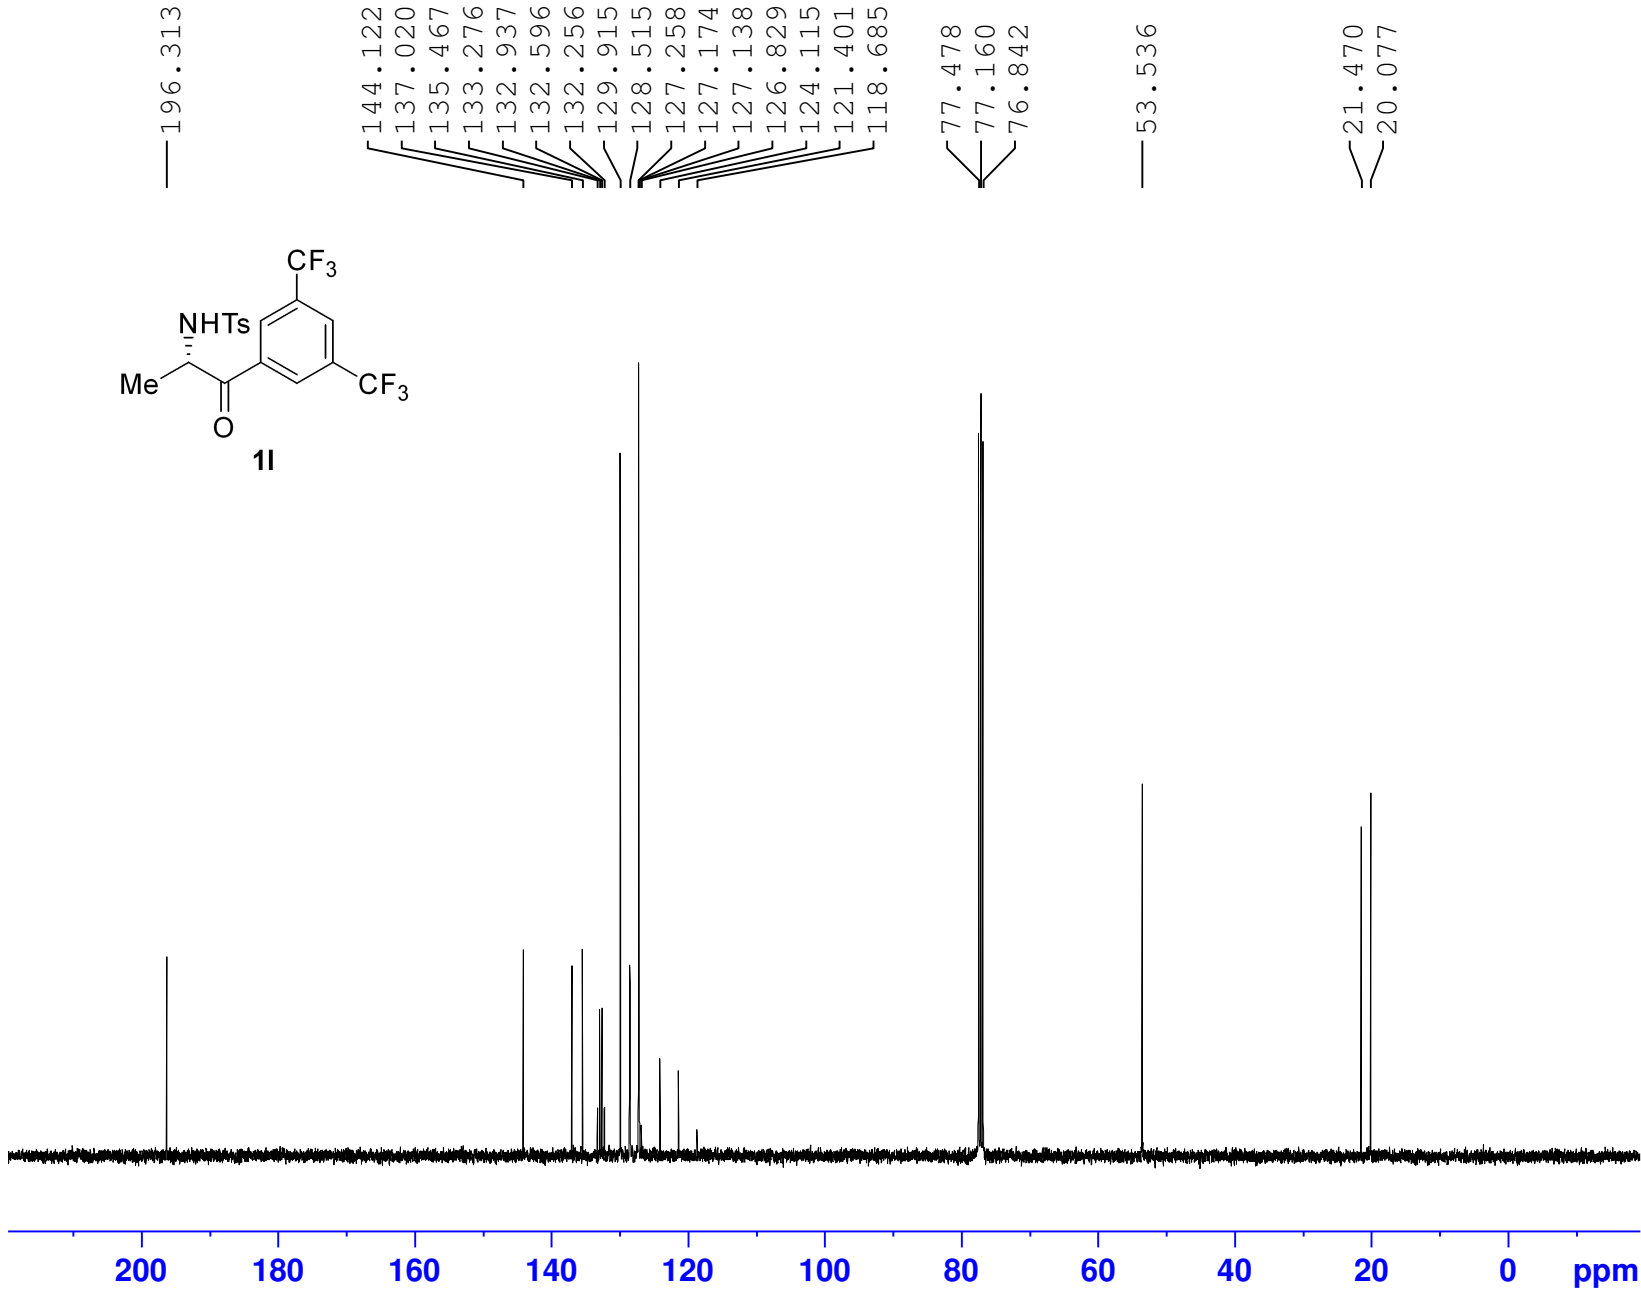

Current Data Parameters  
NAME qh-11153  
EXPNO 2  
PROCNO 1

F2 - Acquisition Parameters  
Date\_ 20150122  
Time 20.11  
INSTRUM spect  
PROBHD 5 mm DUL 13C-1  
PULPROG zgpg30  
TD 65536  
SOLVENT CDC13  
NS 219  
DS 2  
SWH 24038.461 Hz  
FIDRES 0.366798 Hz  
AQ 1.3631488 sec  
RG 196.92  
DW 20.800 usec  
DE 6.50 usec  
TE 296.7 K  
D1 2.00000000 sec  
D11 0.03000000 sec  
TD0 1

==== CHANNEL f1 =====  
SFO1 100.6228298 MHz  
NUC1 13C  
P1 9.60 usec  
PLW1 31.98900032 W

==== CHANNEL f2 =====  
SFO2 400.1316005 MHz  
NUC2 1H  
CPDPRG[2] waltz16  
PCPD2 90.00 usec  
PLW2 9.10000038 W  
PLW12 0.24608000 W  
PLW13 0.19933000 W

F2 - Processing parameters  
SI 32768  
SF 100.6127568 MHz  
WDW EM  
SSB 0  
LB 1.00 Hz  
GB 0  
PC 1.40



Current Data Parameters  
NAME ss-qh-11144  
EXPNO 1  
PROCNO 1

F2 - Acquisition Parameters  
Date\_ 20200811  
Time 20.13  
INSTRUM spect  
PROBHD 5 mm PABBO BB/  
PULPROG zg30  
TD 65536  
SOLVENT CDC13  
NS 6  
DS 0  
SWH 8012.820 Hz  
FIDRES 0.122266 Hz  
AQ 4.0894465 sec  
RG 31.55  
DW 62.400 usec  
DE 6.50 usec  
TE 297.5 K  
D1 1.00000000 sec  
TD0 1

==== CHANNEL f1 =====  
SFO1 400.1324710 MHz  
NUC1 1H  
P1 14.50 usec  
PLW1 11.99499989 W

F2 - Processing parameters  
SI 65536  
SF 400.1300097 MHz  
WDW EM  
SSB 0  
LB 0.30 Hz  
GB 0  
PC 1.00

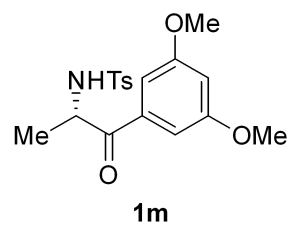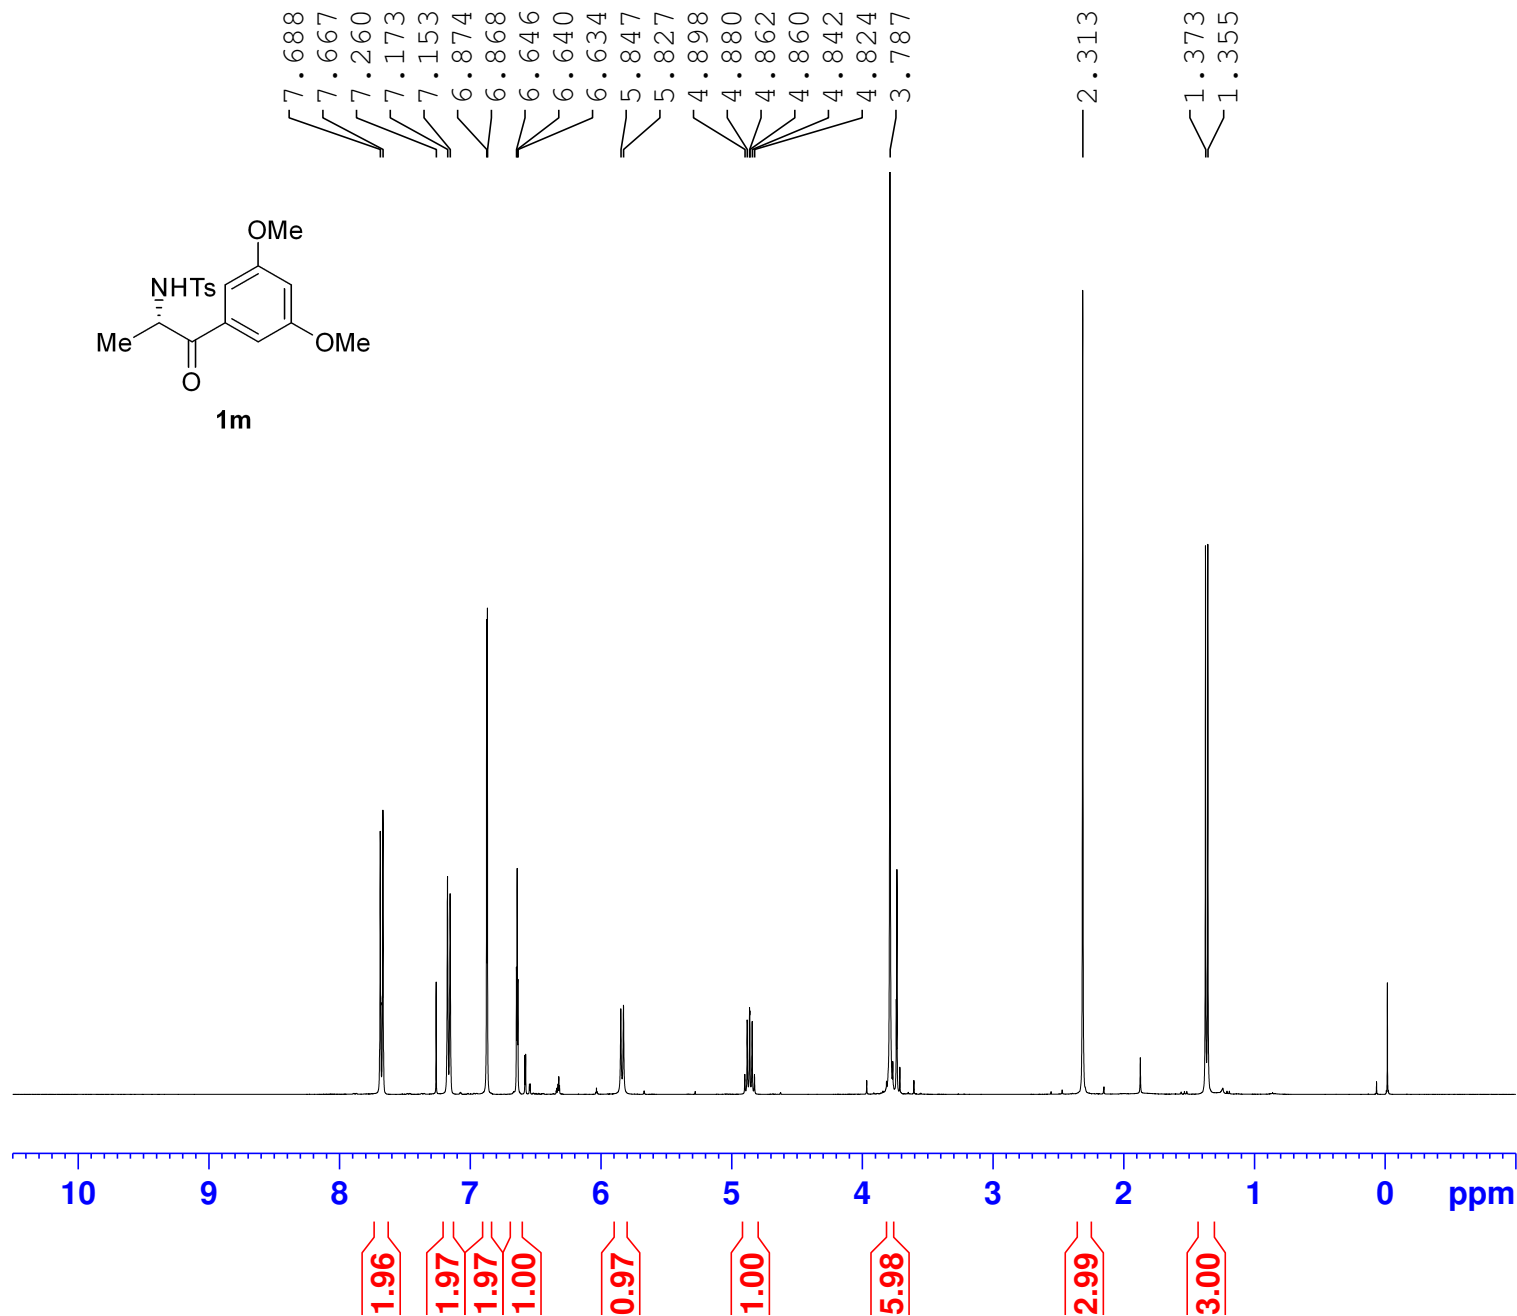



— 198.080

— 161.116

— 143.653

— 137.186

— 135.403

— 129.833

— 127.157

— 106.384

— 106.197

— 77.477

— 77.159

— 76.841

— 55.784

— 53.640

— 21.586

— 21.366

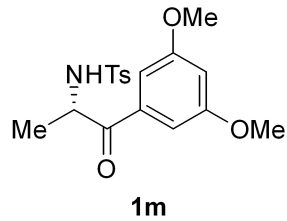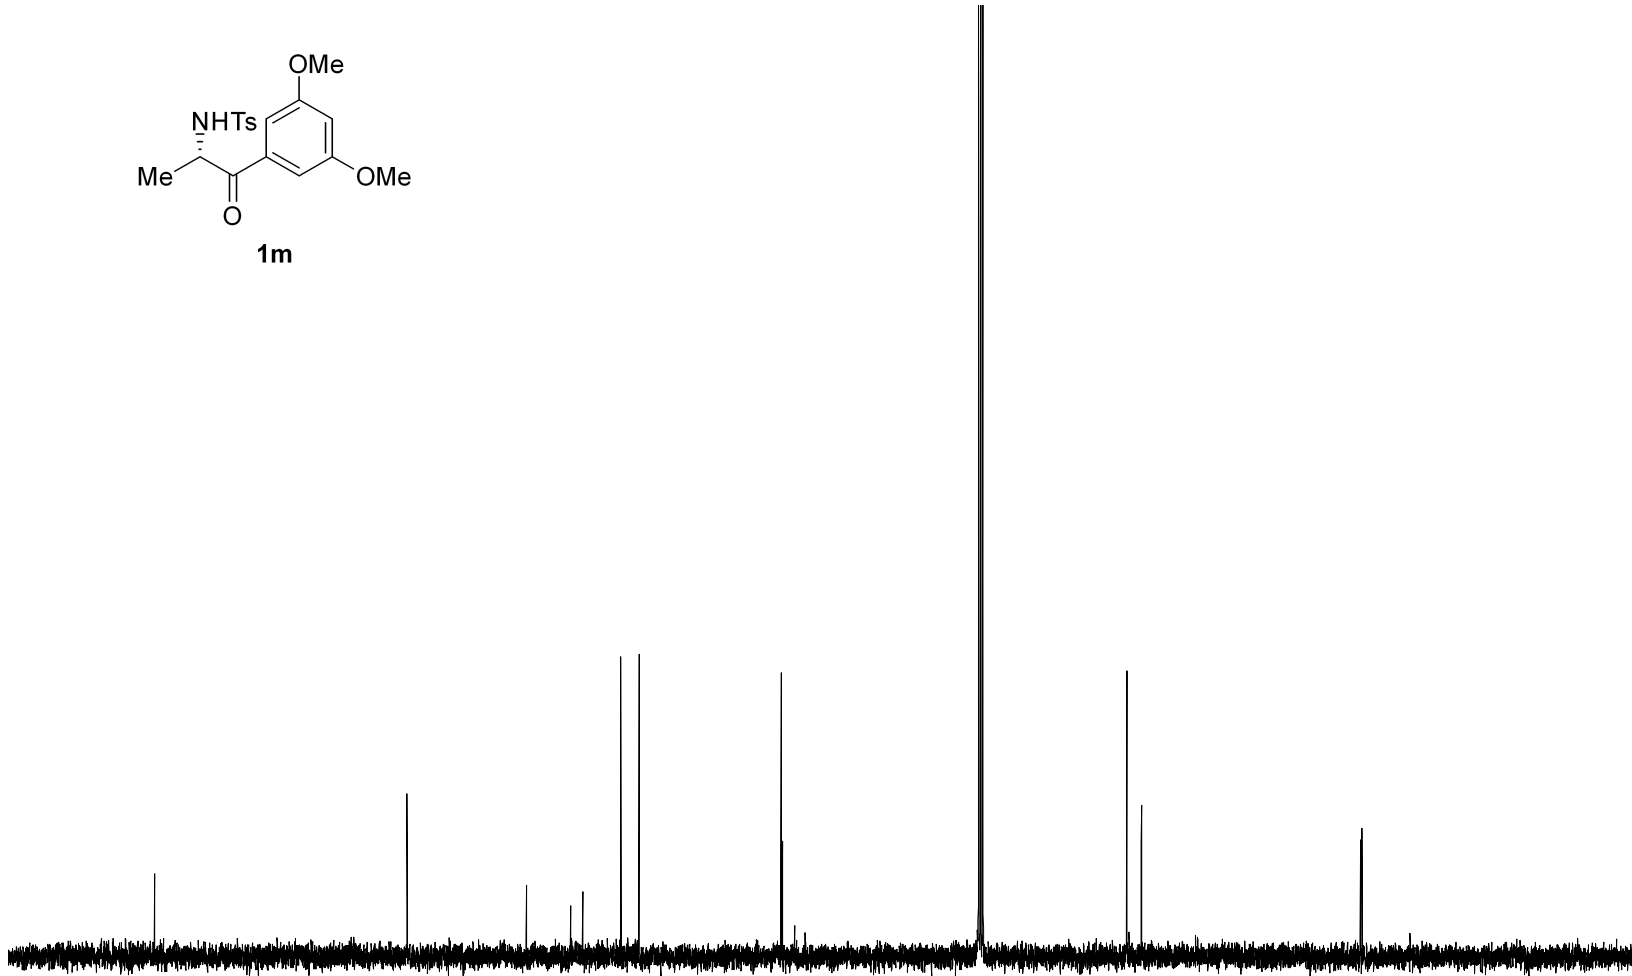

Current Data Parameters  
NAME qh-11144  
EXPNO 2  
PROCNO 1

F2 - Acquisition Parameters  
Date\_ 20150120  
Time 11.39  
INSTRUM spect  
PROBHD 5 mm DUL 13C-1  
PULPROG zgpg30  
TD 65536  
SOLVENT CDC13  
NS 121  
DS 2  
SWH 24038.461 Hz  
FIDRES 0.366798 Hz  
AQ 1.3631488 sec  
RG 196.92  
DW 20.800 usec  
DE 6.50 usec  
TE 296.5 K  
D1 2.00000000 sec  
D11 0.03000000 sec  
TD0 1

==== CHANNEL f1 =====  
SFO1 100.6228298 MHz  
NUC1 13C  
P1 9.60 usec  
PLW1 31.98900032 W

==== CHANNEL f2 =====  
SFO2 400.1316005 MHz  
NUC2 1H  
CPDPRG[2] waltz16  
PCPD2 90.00 usec  
PLW2 9.10000038 W  
PLW12 0.24608000 W  
PLW13 0.19933000 W

F2 - Processing parameters  
SI 32768  
SF 100.6127568 MHz  
WDW EM  
SSB 0  
LB 1.00 Hz  
GB 0  
PC 1.40

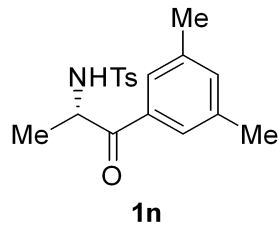

7.700  
7.681  
7.349  
7.260  
7.194  
7.168  
7.149

5.873  
5.853

4.949  
4.930  
4.912  
4.894  
4.875

2.324  
2.306

1.376  
1.358

Current Data Parameters  
NAME qh-11143  
EXPNO 1  
PROCNO 1

F2 - Acquisition Parameters  
Date\_ 20150119  
Time 12.22  
INSTRUM spect  
PROBHD 5 mm DUL 13C-1  
PULPROG zg30  
TD 65536  
SOLVENT CDC13  
NS 2  
DS 0  
SWH 8012.820 Hz  
FIDRES 0.122266 Hz  
AQ 4.0894465 sec  
RG 22.47  
DW 62.400 usec  
DE 6.50 usec  
TE 295.8 K  
D1 1.00000000 sec  
TD0 1

==== CHANNEL f1 =====  
SFO1 400.1324710 MHz  
NUC1 1H  
P1 14.30 usec  
PLW1 9.10000038 W

F2 - Processing parameters  
SI 65536  
SF 400.1300096 MHz  
WDW EM  
SSB 0  
LB 0.30 Hz  
GB 0  
PC 1.00

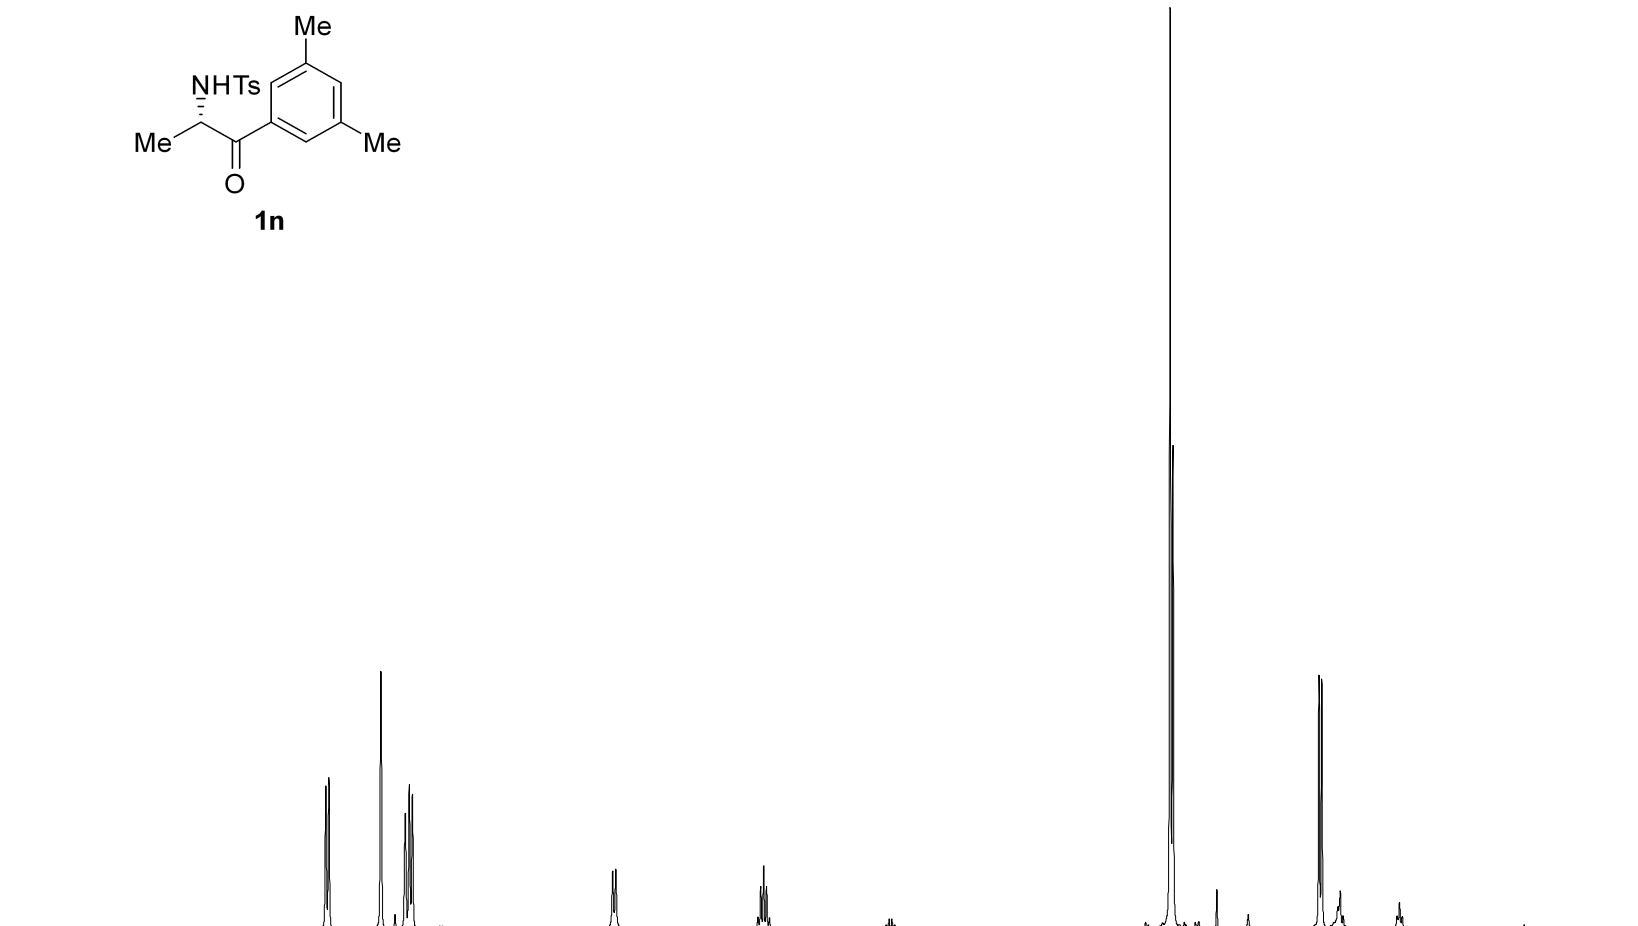

2.04  
2.08  
3.11

1.00

1.04

6.14  
3.09

3.12

—198.527

143.476  
138.629  
137.263  
135.814  
133.548  
129.697  
127.062  
126.267

77.477  
77.159  
76.841

—53.476

21.485  
21.318  
21.221

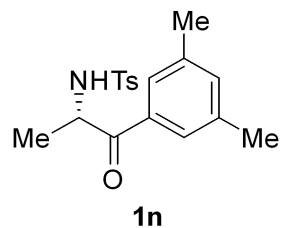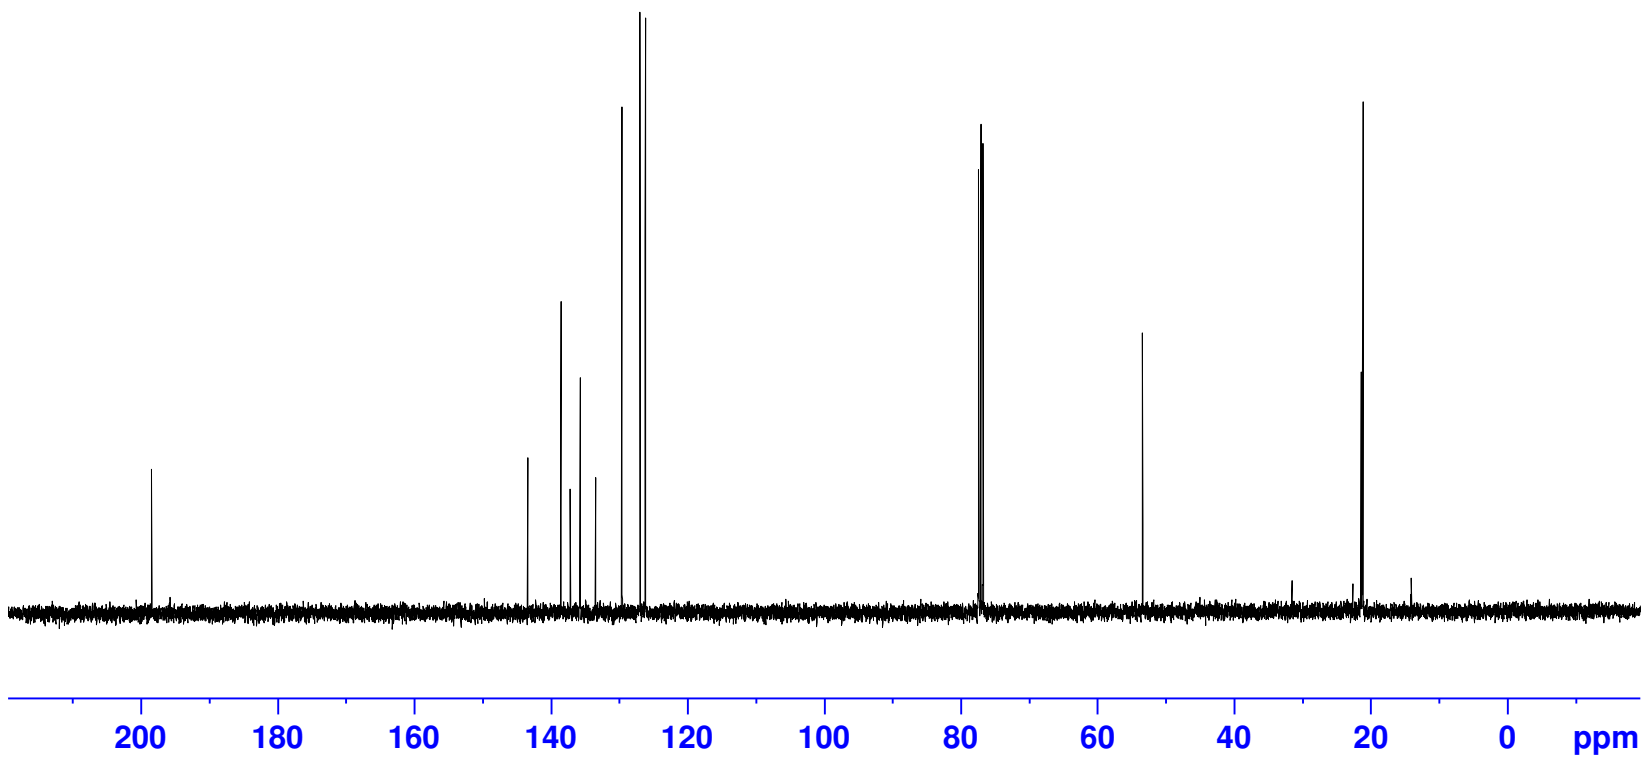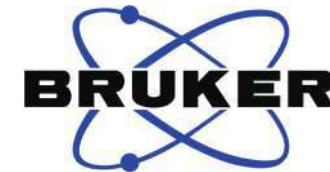

Current Data Parameters  
 NAME qh-11143  
 EXPNO 2  
 PROCNO 1

F2 - Acquisition Parameters  
 Date\_ 20150119  
 Time 12.24  
 INSTRUM spect  
 PROBHD 5 mm DUL 13C-1  
 PULPROG zgpg30  
 TD 65536  
 SOLVENT CDC13  
 NS 31  
 DS 2  
 SWH 24038.461 Hz  
 FIDRES 0.366798 Hz  
 AQ 1.3631488 sec  
 RG 196.92  
 DW 20.800 usec  
 DE 6.50 usec  
 TE 296.4 K  
 D1 2.0000000 sec  
 D11 0.0300000 sec  
 TD0 1

==== CHANNEL f1 =====  
 SFO1 100.6228298 MHz  
 NUC1 13C  
 P1 9.60 usec  
 PLW1 31.98900032 W

==== CHANNEL f2 =====  
 SFO2 400.1316005 MHz  
 NUC2 1H  
 CPDPRG[2] waltz16  
 PCPD2 90.00 usec  
 PLW2 9.10000038 W  
 PLW12 0.24608000 W  
 PLW13 0.19933000 W

F2 - Processing parameters  
 SI 32768  
 SF 100.6127649 MHz  
 WDW EM  
 SSB 0  
 LB 1.00 Hz  
 GB 0  
 PC 1.40



8.296  
7.955  
7.935  
7.878  
7.856  
7.809  
7.787  
7.724  
7.704  
7.654  
7.636  
7.616  
7.599  
7.579  
7.561  
7.260  
7.135  
7.115  
5.898  
5.878  
5.156  
5.138  
5.120  
5.101  
5.082

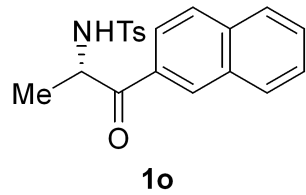

— 2.252  
1.477  
1.459

Current Data Parameters  
NAME qh-11155  
EXPNO 1  
PROCNO 1

F2 - Acquisition Parameters  
Date\_ 20150123  
Time 19.30  
INSTRUM spect  
PROBHD 5 mm DUL 13C-1  
PULPROG zg30  
TD 65536  
SOLVENT CDC13  
NS 1  
DS 0  
SWH 8012.820 Hz  
FIDRES 0.122266 Hz  
AQ 4.0894465 sec  
RG 62.93  
DW 62.400 usec  
DE 6.50 usec  
TE 295.5 K  
D1 1.00000000 sec  
TD0 1

==== CHANNEL f1 =====  
SFO1 400.1324710 MHz  
NUC1 1H  
P1 14.30 usec  
PLW1 9.10000038 W

F2 - Processing parameters  
SI 65536  
SF 400.1300093 MHz  
WDW EM  
SSB 0  
LB 0.30 Hz  
GB 0  
PC 1.00

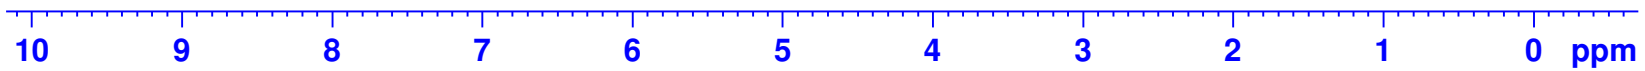

1.00  
1.06  
2.04  
1.07  
2.02  
2.06  
2.01

0.95

1.01

3.01

3.00

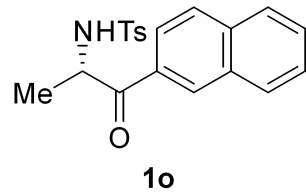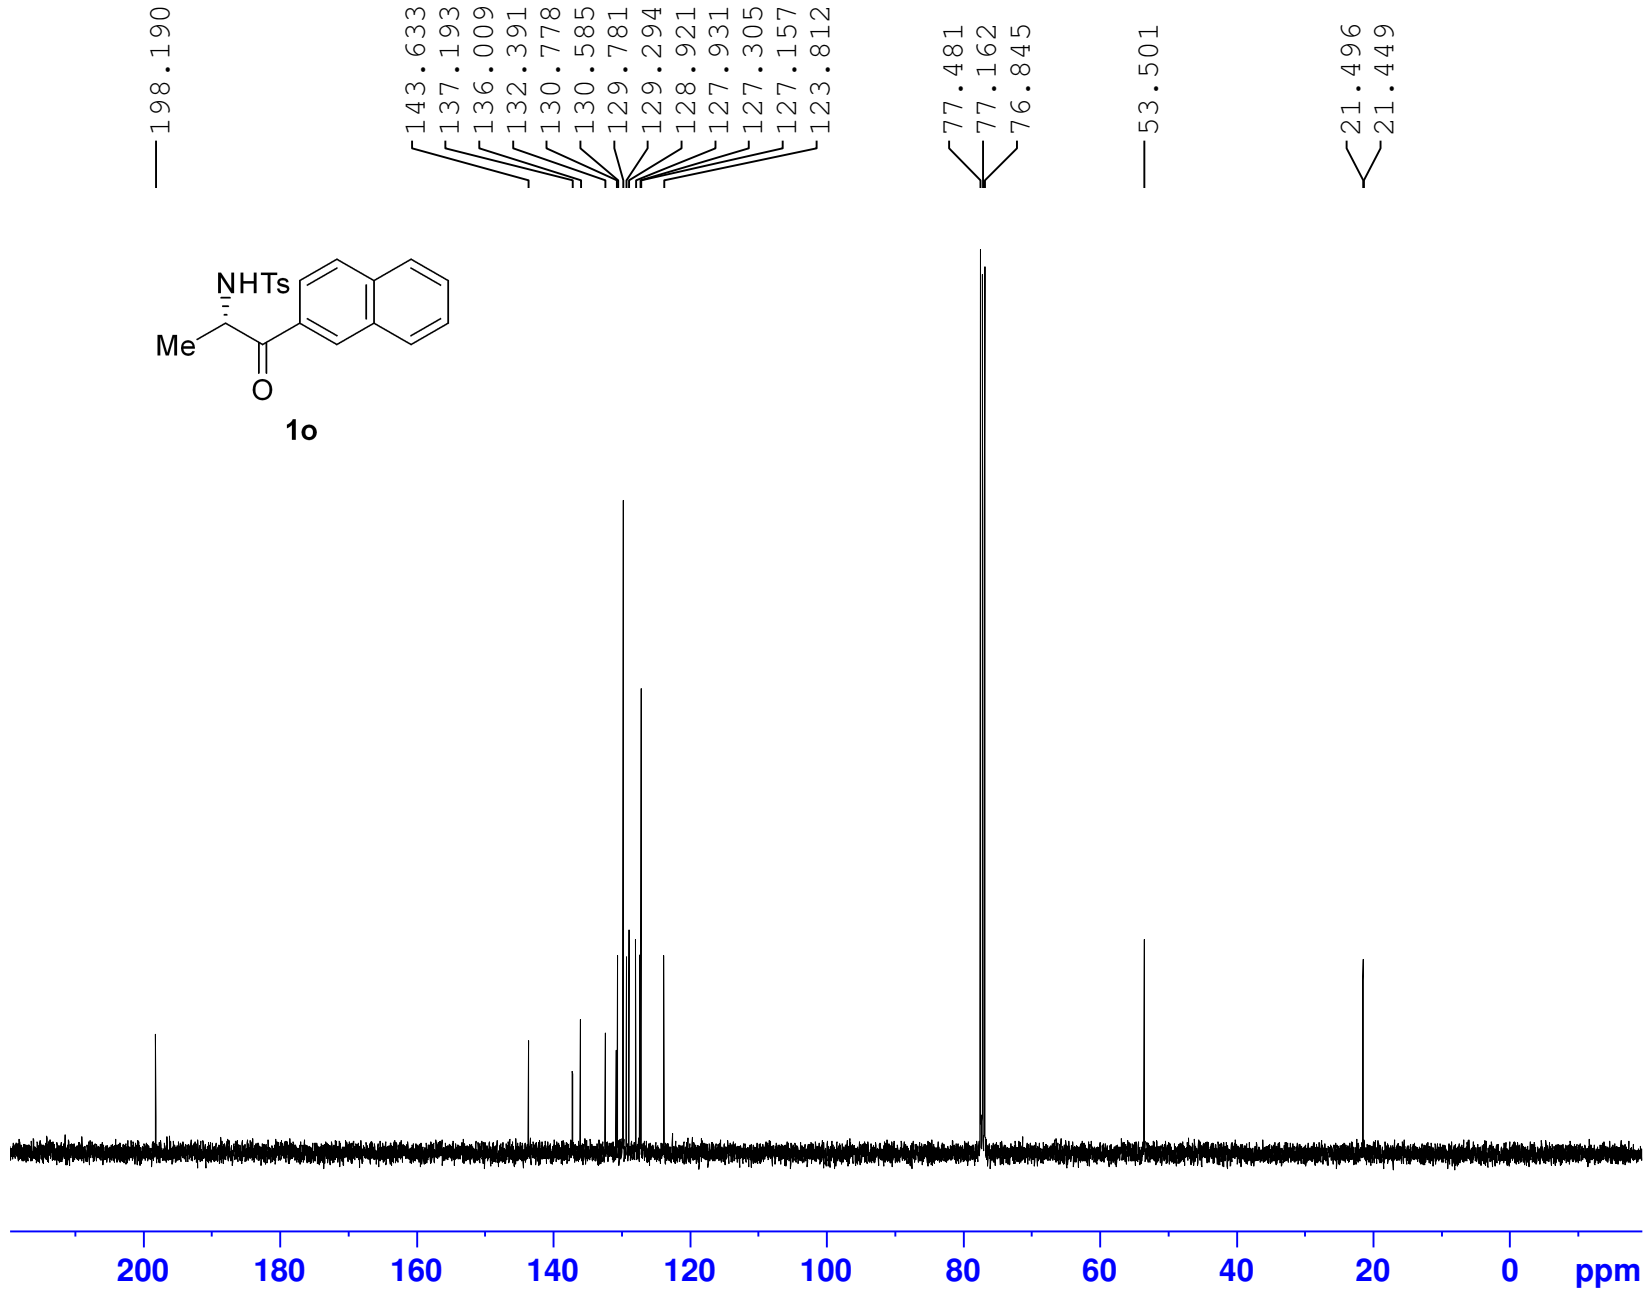

Current Data Parameters  
NAME qh-11155  
EXPNO 2  
PROCNO 1

F2 - Acquisition Parameters  
Date\_ 20150123  
Time 19.35  
INSTRUM spect  
PROBHD 5 mm DUL 13C-1  
PULPROG zgpg30  
TD 65536  
SOLVENT CDC13  
NS 88  
DS 2  
SWH 24038.461 Hz  
FIDRES 0.366798 Hz  
AQ 1.3631488 sec  
RG 196.92  
DW 20.800 usec  
DE 6.50 usec  
TE 296.3 K  
D1 2.00000000 sec  
D11 0.03000000 sec  
TD0 1

==== CHANNEL f1 =====  
SFO1 100.6228298 MHz  
NUC1 13C  
P1 9.60 usec  
PLW1 31.98900032 W

==== CHANNEL f2 =====  
SFO2 400.1316005 MHz  
NUC2 1H  
CPDPRG[2] waltz16  
PCPD2 90.00 usec  
PLW2 9.10000038 W  
PLW12 0.24608000 W  
PLW13 0.19933000 W

F2 - Processing parameters  
SI 32768  
SF 100.6127597 MHz  
WDW EM  
SSB 0  
LB 1.00 Hz  
GB 0  
PC 1.40



7.695  
7.693  
7.683  
7.681  
7.673  
7.652  
7.647  
7.639  
7.637  
7.260  
7.166  
7.146  
7.136  
7.126  
7.124  
7.114  
5.673  
5.651  
4.799  
4.782  
4.764  
4.760  
4.742  
4.724

2.322

1.455  
1.437

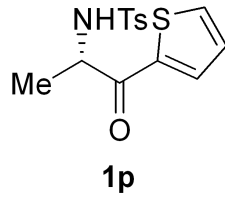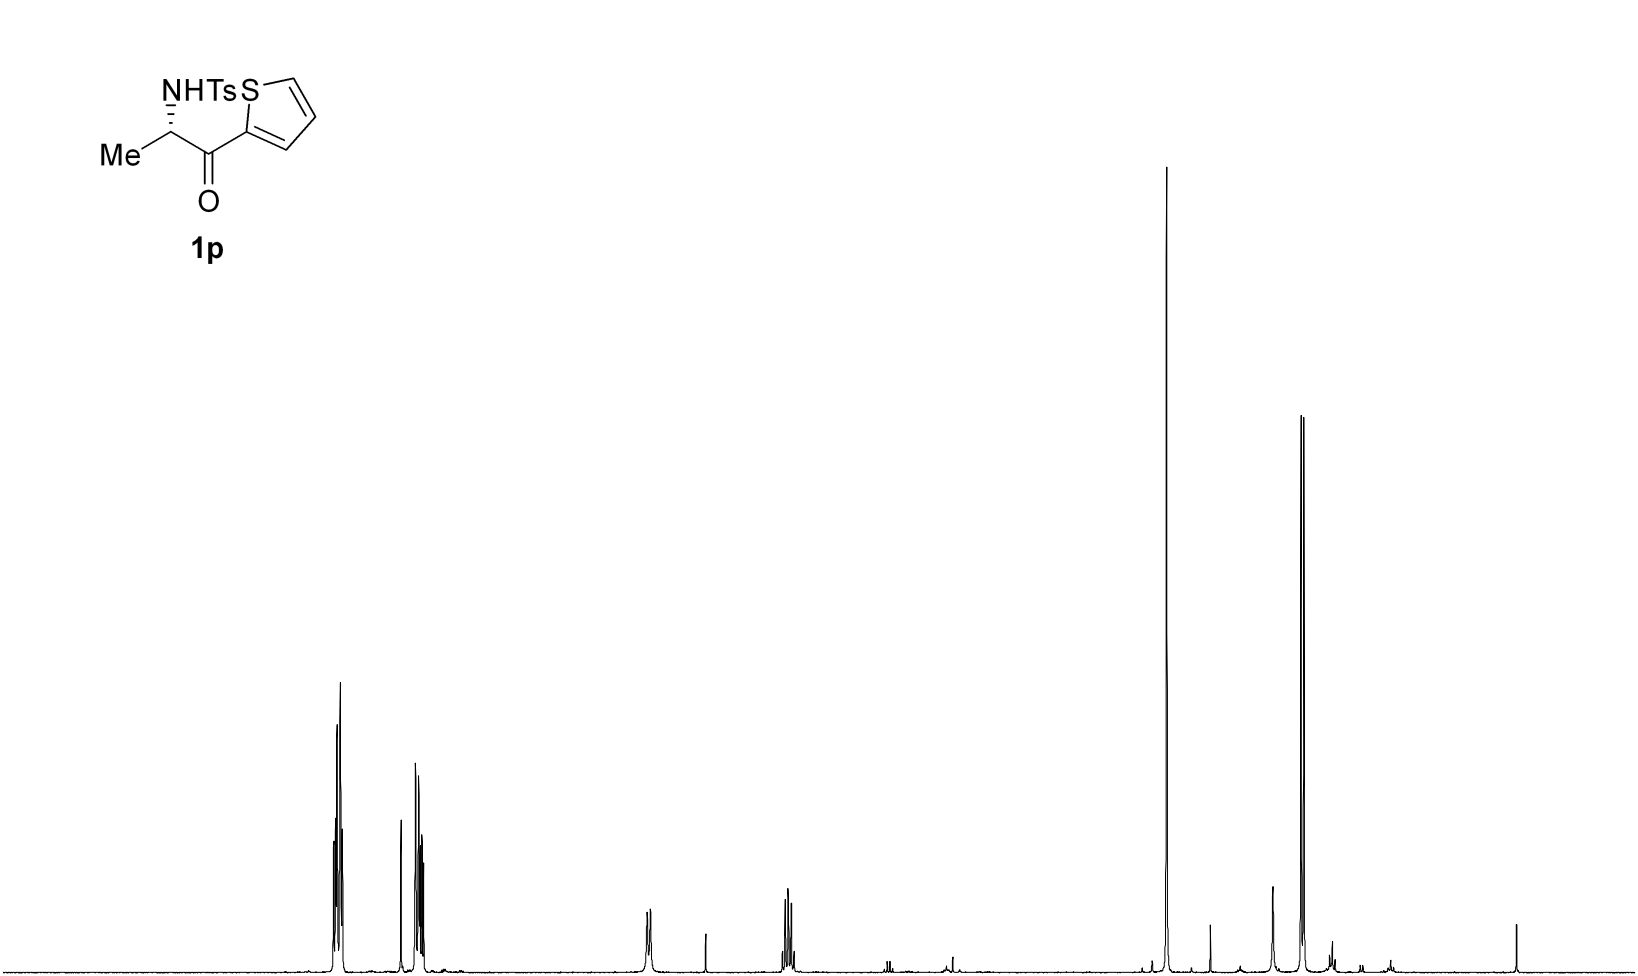

4.00

3.00

0.94

1.02

3.02

3.05

Current Data Parameters  
NAME qh-11158  
EXPNO 1  
PROCNO 1

F2 - Acquisition Parameters  
Date\_ 20150127  
Time 14.13  
INSTRUM spect  
PROBHD 5 mm PABBO BB/  
PULPROG zg30  
TD 65536  
SOLVENT CDC13  
NS 1  
DS 0  
SWH 8012.820 Hz  
FIDRES 0.122266 Hz  
AQ 4.0894465 sec  
RG 82.92  
DW 62.400 usec  
DE 6.50 usec  
TE 296.1 K  
D1 1.00000000 sec  
TD0 1

==== CHANNEL f1 =====  
SFO1 400.1324710 MHz  
NUC1 1H  
P1 14.50 usec  
PLW1 11.99499989 W

F2 - Processing parameters  
SI 65536  
SF 400.1300094 MHz  
WDW EM  
SSB 0  
LB 0.30 Hz  
GB 0  
PC 1.00



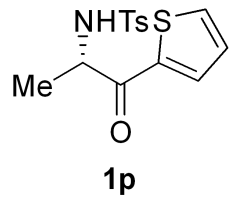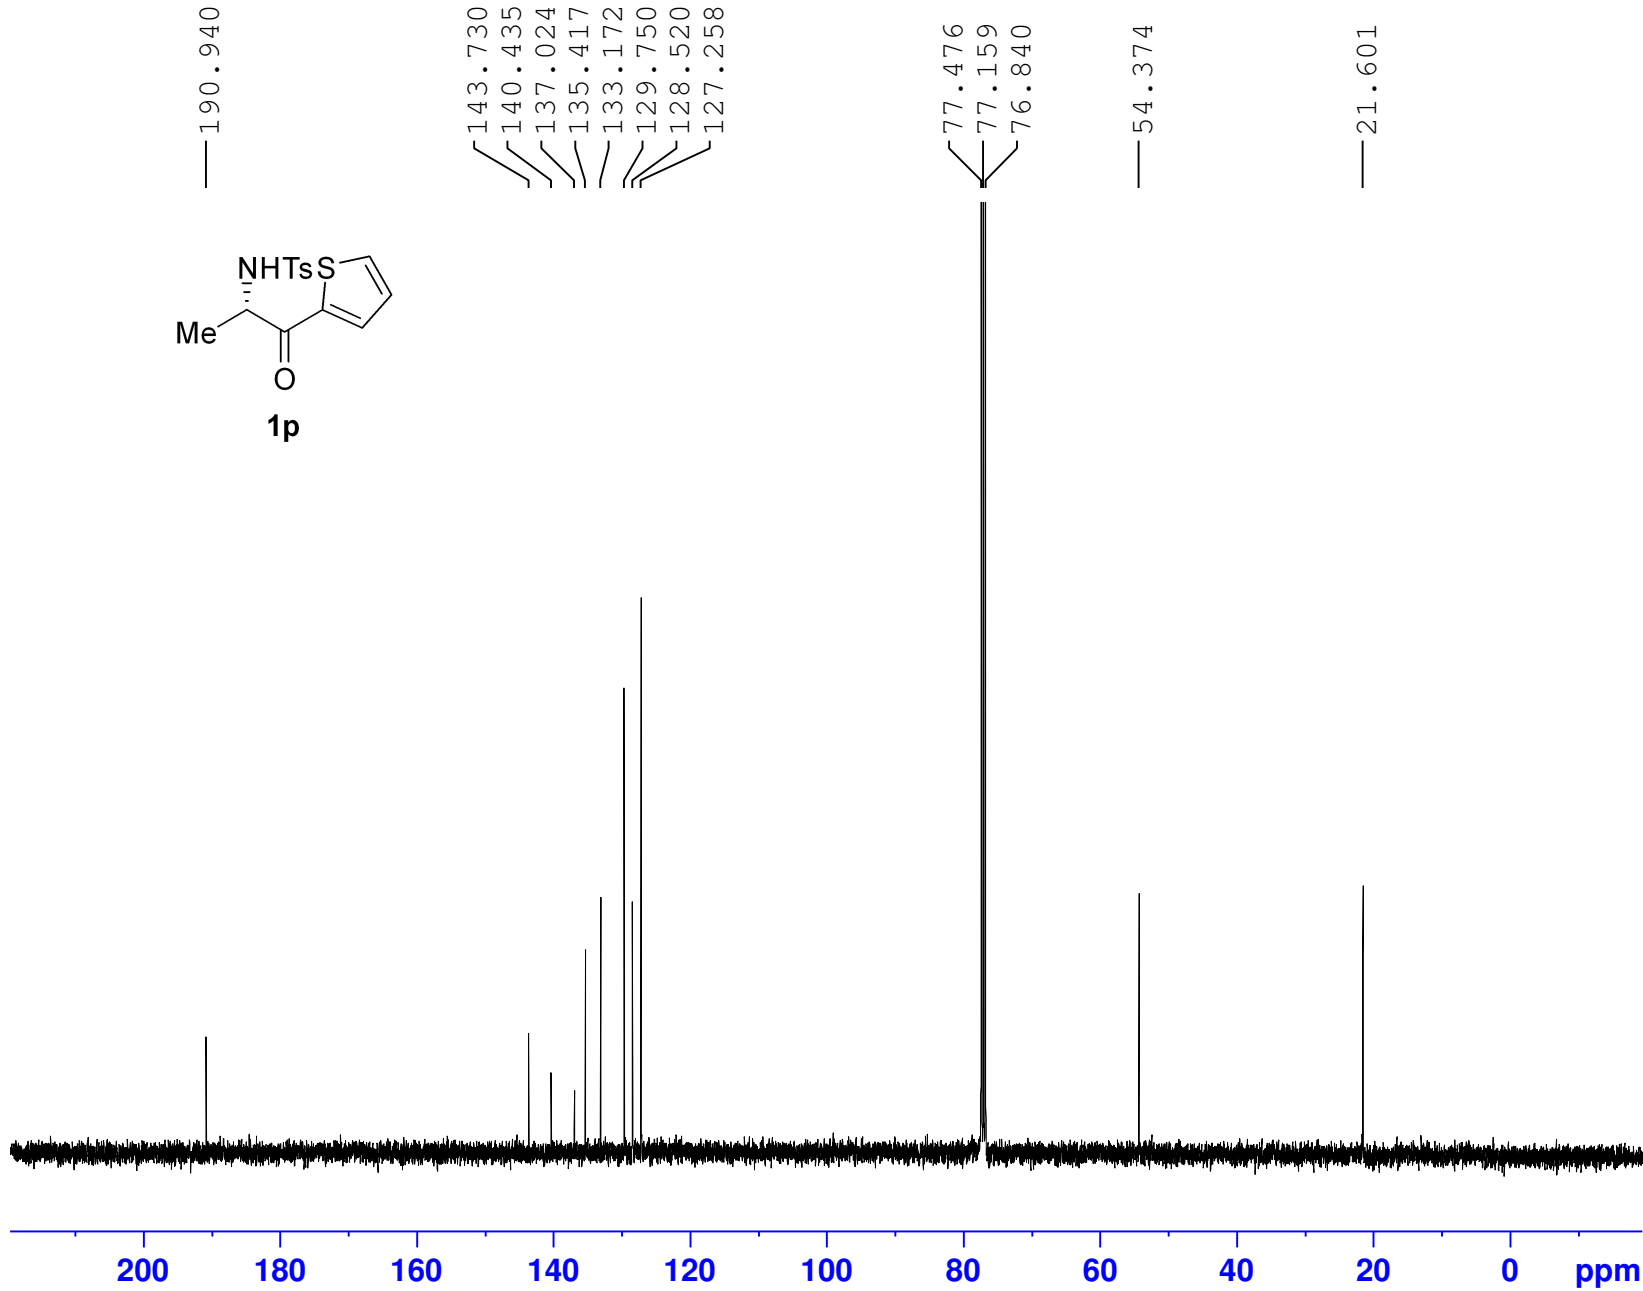

Current Data Parameters  
NAME qh-11158  
EXPNO 2  
PROCNO 1

F2 - Acquisition Parameters  
Date\_ 20150127  
Time 14.19  
INSTRUM spect  
PROBHD 5 mm PABBO BB/  
PULPROG zgpg30  
TD 65536  
SOLVENT CDC13  
NS 118  
DS 2  
SWH 24038.461 Hz  
FIDRES 0.366798 Hz  
AQ 1.3631488 sec  
RG 196.92  
DW 20.800 usec  
DE 6.50 usec  
TE 297.2 K  
D1 2.00000000 sec  
D11 0.03000000 sec  
TD0 1

==== CHANNEL f1 =====  
SFO1 100.6228298 MHz  
NUC1 13C  
P1 9.70 usec  
PLW1 46.98899841 W

==== CHANNEL f2 =====  
SFO2 400.1316005 MHz  
NUC2 1H  
CPDPRG[2] waltz16  
PCPD2 90.00 usec  
PLW2 11.99499989 W  
PLW12 0.34213999 W  
PLW13 0.27713001 W

F2 - Processing parameters  
SI 32768  
SF 100.6127568 MHz  
WDW EM  
SSB 0  
LB 1.00 Hz  
GB 0  
PC 1.40

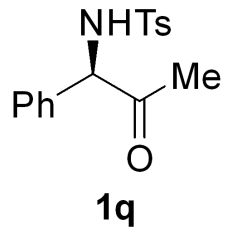

7.477  
7.456  
7.260  
7.224  
7.209  
7.196  
7.110  
7.091  
7.072  
— 6.096

5.030  
5.017

2.326  
1.983  
1.981

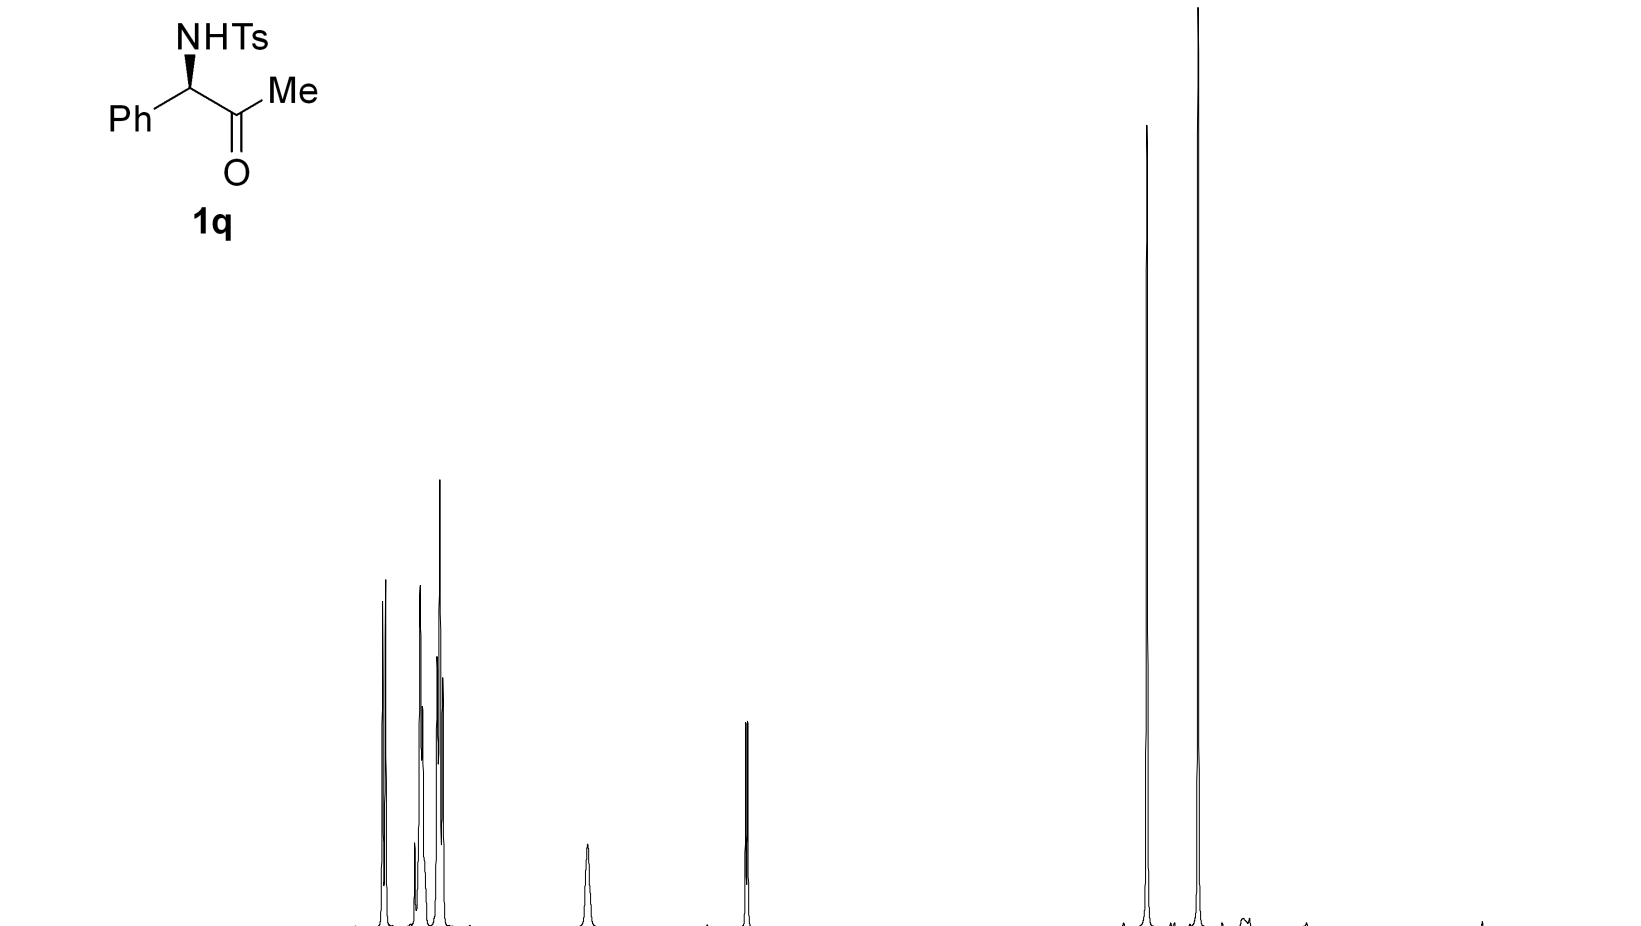

Current Data Parameters  
NAME qh-11063-2  
EXPNO 1  
PROCNO 1

F2 - Acquisition Parameters  
Date\_ 20150401  
Time 19.04  
INSTRUM spect  
PROBHD 5 mm PABBO BB/  
PULPROG zg30  
TD 65536  
SOLVENT CDC13  
NS 2  
DS 0  
SWH 8012.820 Hz  
FIDRES 0.122266 Hz  
AQ 4.0894465 sec  
RG 54.81  
DW 62.400 usec  
DE 6.50 usec  
TE 296.4 K  
D1 1.00000000 sec  
TD0 1

==== CHANNEL f1 =====  
SFO1 400.1324710 MHz  
NUC1 1H  
P1 14.50 usec  
PLW1 11.99499989 W

F2 - Processing parameters  
SI 65536  
SF 400.1300091 MHz  
WDW EM  
SSB 0  
LB 0.30 Hz  
GB 0  
PC 1.00

— 201.927

143.255  
137.328  
135.098  
129.387  
129.142  
128.742  
128.129  
127.038

77.477  
77.159  
76.841  
— 66.455

— 26.689  
— 21.536

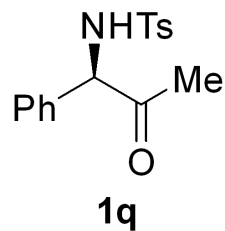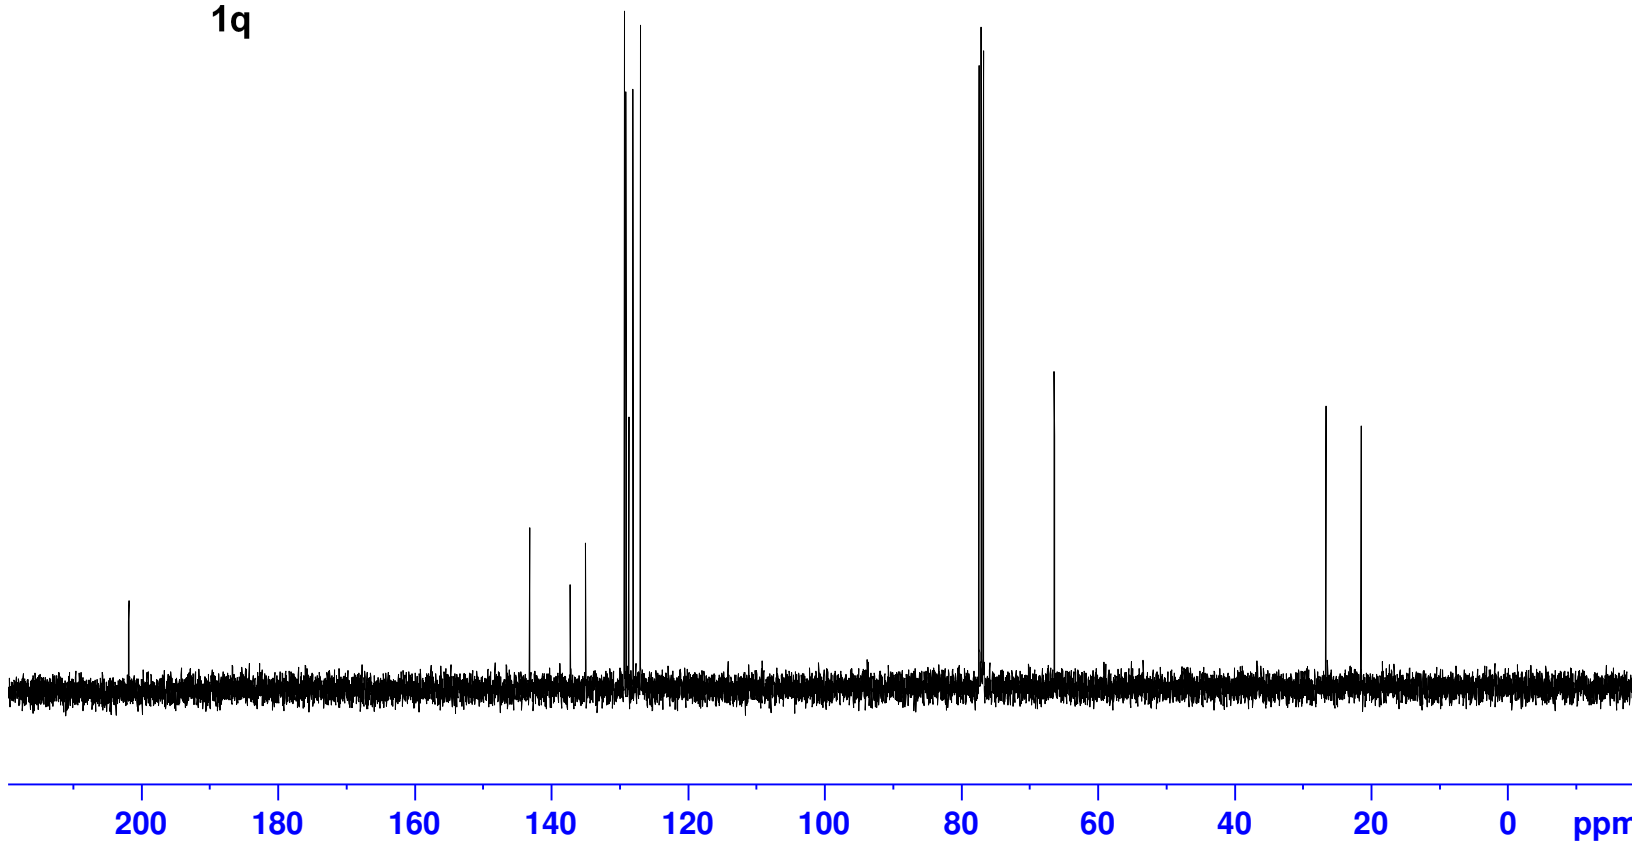

Current Data Parameters  
 NAME qh-11063-2  
 EXPNO 2  
 PROCNO 1

F2 - Acquisition Parameters  
 Date\_ 20150401  
 Time 19.05  
 INSTRUM spect  
 PROBHD 5 mm PABBO BB/  
 PULPROG zgpg30  
 TD 65536  
 SOLVENT CDC13  
 NS 22  
 DS 2  
 SWH 24038.461 Hz  
 FIDRES 0.366798 Hz  
 AQ 1.3631488 sec  
 RG 196.92  
 DW 20.800 usec  
 DE 6.50 usec  
 TE 296.9 K  
 D1 2.00000000 sec  
 D11 0.03000000 sec  
 TD0 1

==== CHANNEL f1 =====  
 SFO1 100.6228298 MHz  
 NUC1 13C  
 P1 9.70 usec  
 PLW1 46.98899841 W

==== CHANNEL f2 =====  
 SFO2 400.1316005 MHz  
 NUC2 1H  
 CPDPRG[2] waltz16  
 PCPD2 90.00 usec  
 PLW2 11.99499989 W  
 PLW12 0.34213999 W  
 PLW13 0.27713001 W

F2 - Processing parameters  
 SI 32768  
 SF 100.6127597 MHz  
 WDW EM  
 SSB 0  
 LB 1.00 Hz  
 GB 0  
 PC 1.40



7.942  
7.921  
7.443  
7.425  
7.397  
7.378  
7.359  
7.329  
7.313  
7.293  
4.406  
4.390  
4.375  
4.359  
2.887  
2.873  
2.856  
2.412  
2.276  
1.687  
1.667  
1.663  
1.395  
1.380  
1.342  
1.330  
1.317  
1.303  
1.296  
1.285  
1.276  
1.255  
1.241  
1.121  
1.116  
1.104  
1.098  
1.086  
1.080  
1.064  
1.045  
1.025  
1.013  
1.008  
0.996  
0.700  
0.682  
0.664

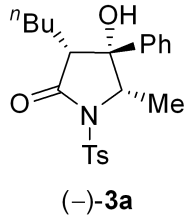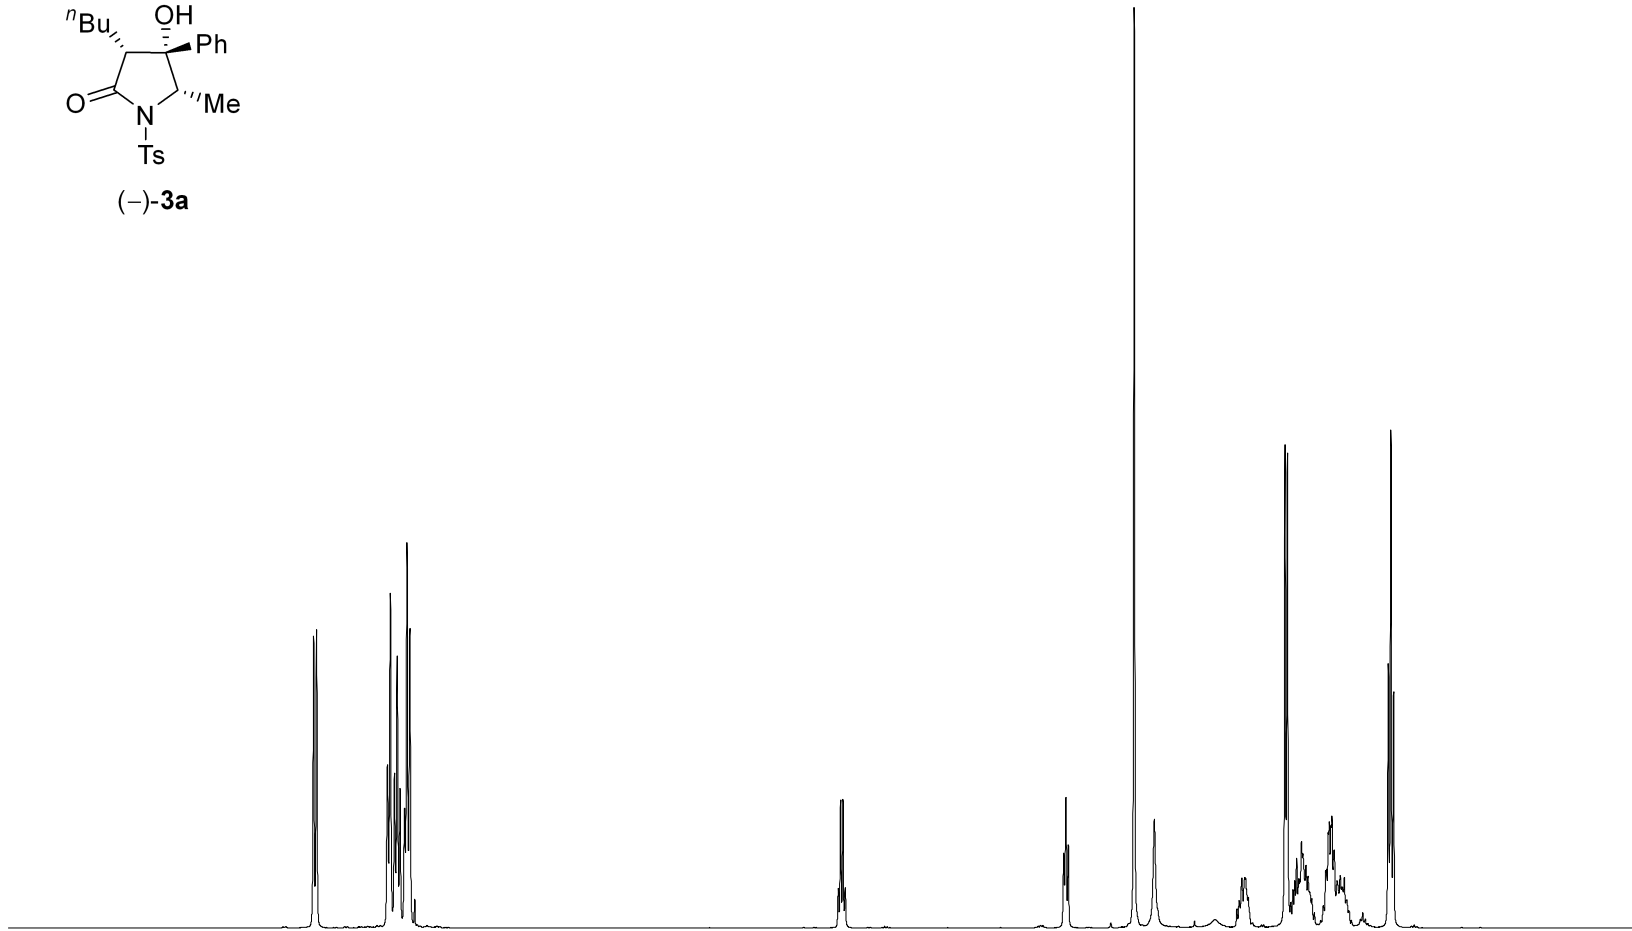

Current Data Parameters  
NAME qh-11062  
EXPNO 1  
PROCNO 1

F2 - Acquisition Parameters  
Date\_ 20150401  
Time 18.56  
INSTRUM spect  
PROBHD 5 mm PABBO BB/  
PULPROG zg30  
TD 65536  
SOLVENT CDCl3  
NS 2  
DS 0  
SWH 8012.820 Hz  
FIDRES 0.122266 Hz  
AQ 4.0894465 sec  
RG 22.47  
DW 62.400 usec  
DE 6.50 usec  
TE 296.6 K  
D1 1.00000000 sec  
TD0 1

==== CHANNEL f1 =====  
SFO1 400.1324710 MHz  
NUC1 1H  
P1 14.50 usec  
PLW1 11.99499989 W

F2 - Processing parameters  
SI 65536  
SF 400.1300087 MHz  
WDW EM  
SSB 0  
LB 0.30 Hz  
GB 0  
PC 1.00

9 8 7 6 5 4 3 2 1 0 ppm

2.00  
1.99  
2.08  
3.02  
1.00  
1.00  
3.06  
0.95  
0.97  
2.98  
2.34  
3.16  
3.03

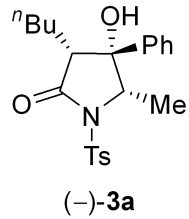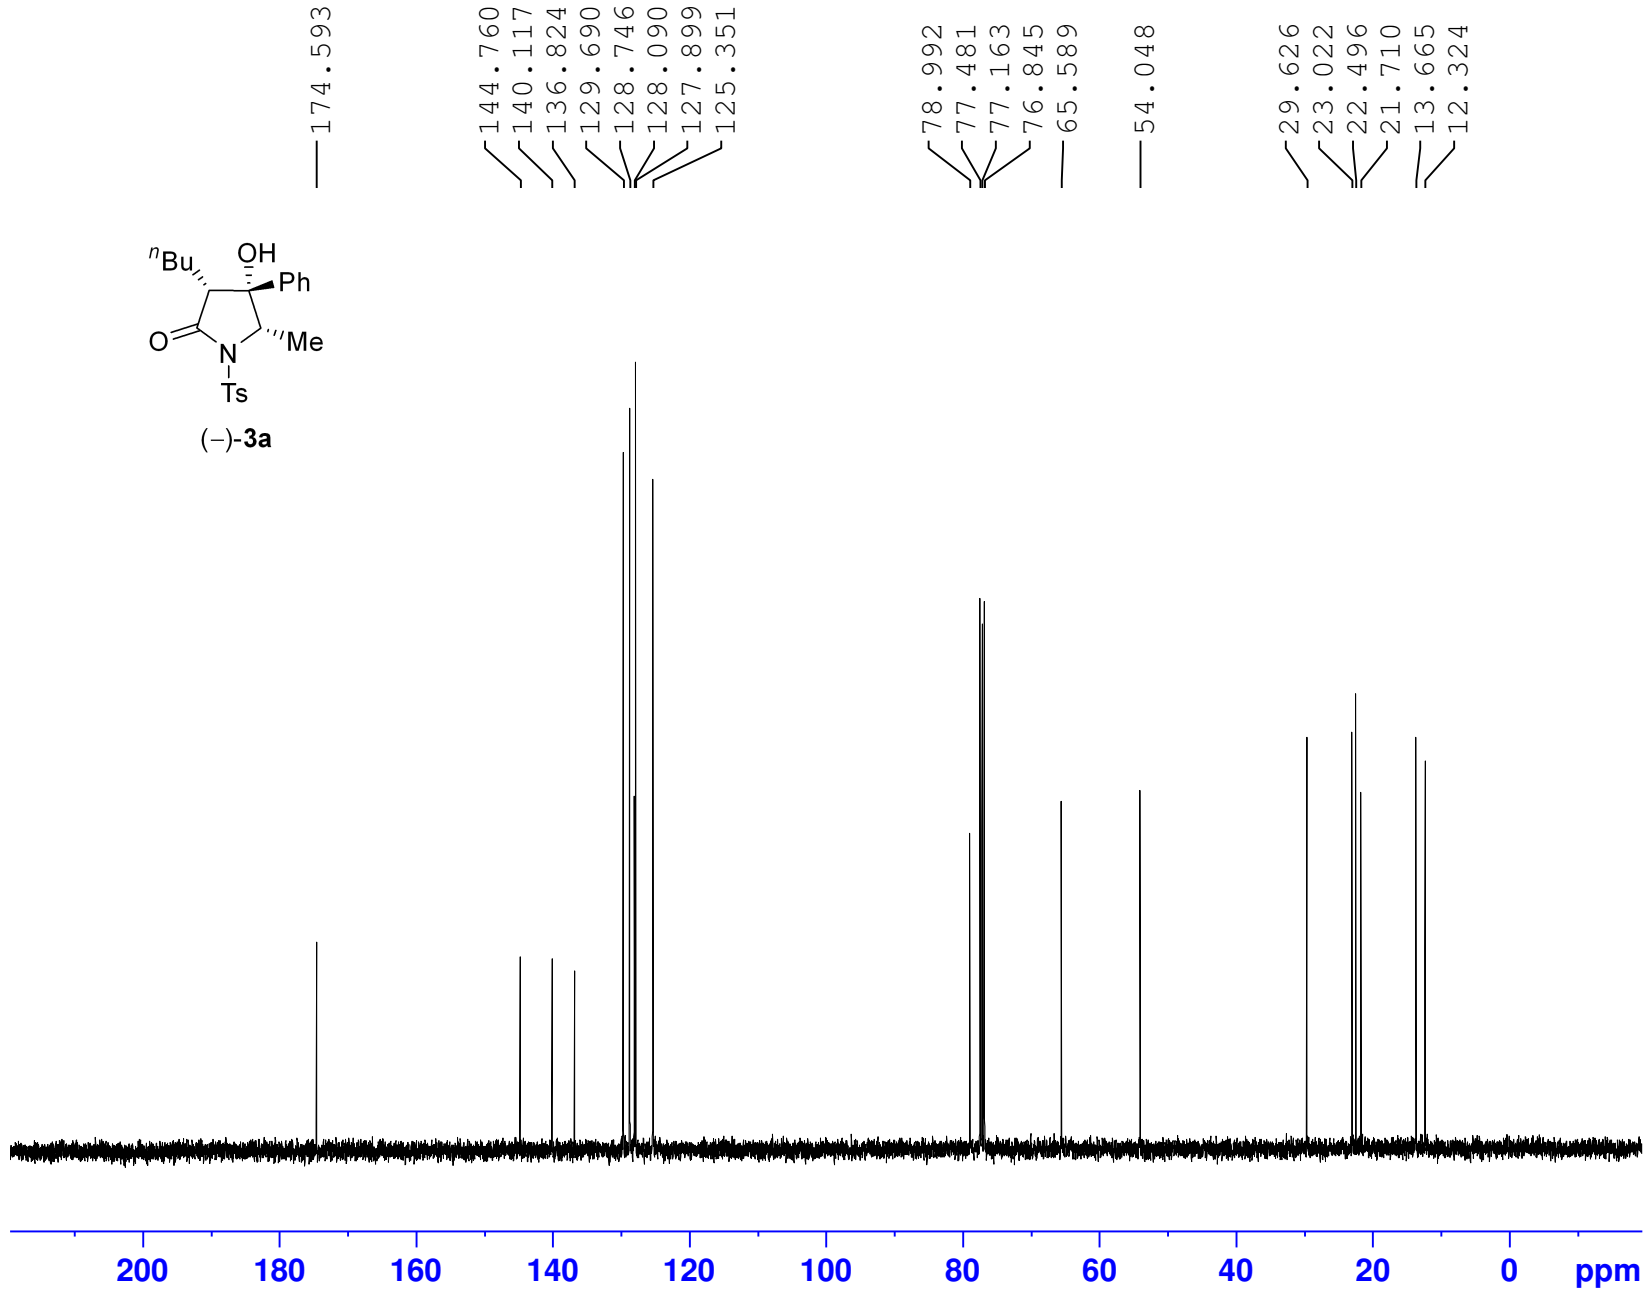

Current Data Parameters  
NAME qh-11062  
EXPNO 2  
PROCNO 1

F2 - Acquisition Parameters  
Date\_ 20150401  
Time 18.58  
INSTRUM spect  
PROBHD 5 mm PABBO BB/  
PULPROG zgpg30  
TD 65536  
SOLVENT CDC13  
NS 29  
DS 2  
SWH 24038.461 Hz  
FIDRES 0.366798 Hz  
AQ 1.3631488 sec  
RG 196.92  
DW 20.800 usec  
DE 6.50 usec  
TE 297.3 K  
D1 2.00000000 sec  
D11 0.03000000 sec  
TD0 1

==== CHANNEL f1 =====  
SFO1 100.6228298 MHz  
NUC1 13C  
P1 9.70 usec  
PLW1 46.98899841 W

==== CHANNEL f2 =====  
SFO2 400.1316005 MHz  
NUC2 1H  
CPDPRG[2] waltz16  
PCPD2 90.00 usec  
PLW2 11.99499989 W  
PLW12 0.34213999 W  
PLW13 0.27713001 W

F2 - Processing parameters  
SI 32768  
SF 100.6127656 MHz  
WDW EM  
SSB 0  
LB 1.00 Hz  
GB 0  
PC 1.40



7.926  
7.905  
7.427  
7.408  
7.373  
7.356  
7.338  
7.320  
7.303  
7.260  
4.567  
4.559  
4.546  
4.539  
2.731  
2.713  
2.699  
2.571  
2.547  
2.537  
2.529  
2.521  
2.512  
2.462  
2.447  
2.343  
2.324  
2.320  
2.303  
2.285  
2.253  
2.235  
2.220  
2.201  
1.905  
1.641  
1.381  
1.135  
1.118  
1.102  
1.087  
1.071  
1.056  
1.047  
1.032  
0.720  
0.703  
0.685

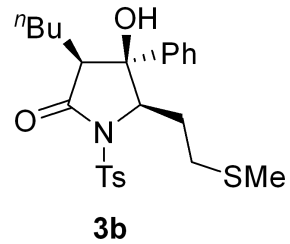

Current Data Parameters  
NAME qh-11127  
EXPNO 3  
PROCNO 1

F2 - Acquisition Parameters  
Date\_ 20150113  
Time 13.56  
INSTRUM spect  
PROBHD 5 mm DUL 13C-1  
PULPROG zg30  
TD 65536  
SOLVENT CDC13  
NS 2  
DS 0  
SWH 8012.820 Hz  
FIDRES 0.122266 Hz  
AQ 4.0894465 sec  
RG 88.84  
DW 62.400 usec  
DE 6.50 usec  
TE 295.8 K  
D1 1.00000000 sec  
TD0 1

==== CHANNEL f1 =====  
SFO1 400.1324710 MHz  
NUC1 1H  
P1 14.30 usec  
PLW1 9.10000038 W

F2 - Processing parameters  
SI 65536  
SF 400.1300103 MHz  
WDW EM  
SSB 0  
LB 0.30 Hz  
GB 0  
PC 1.00

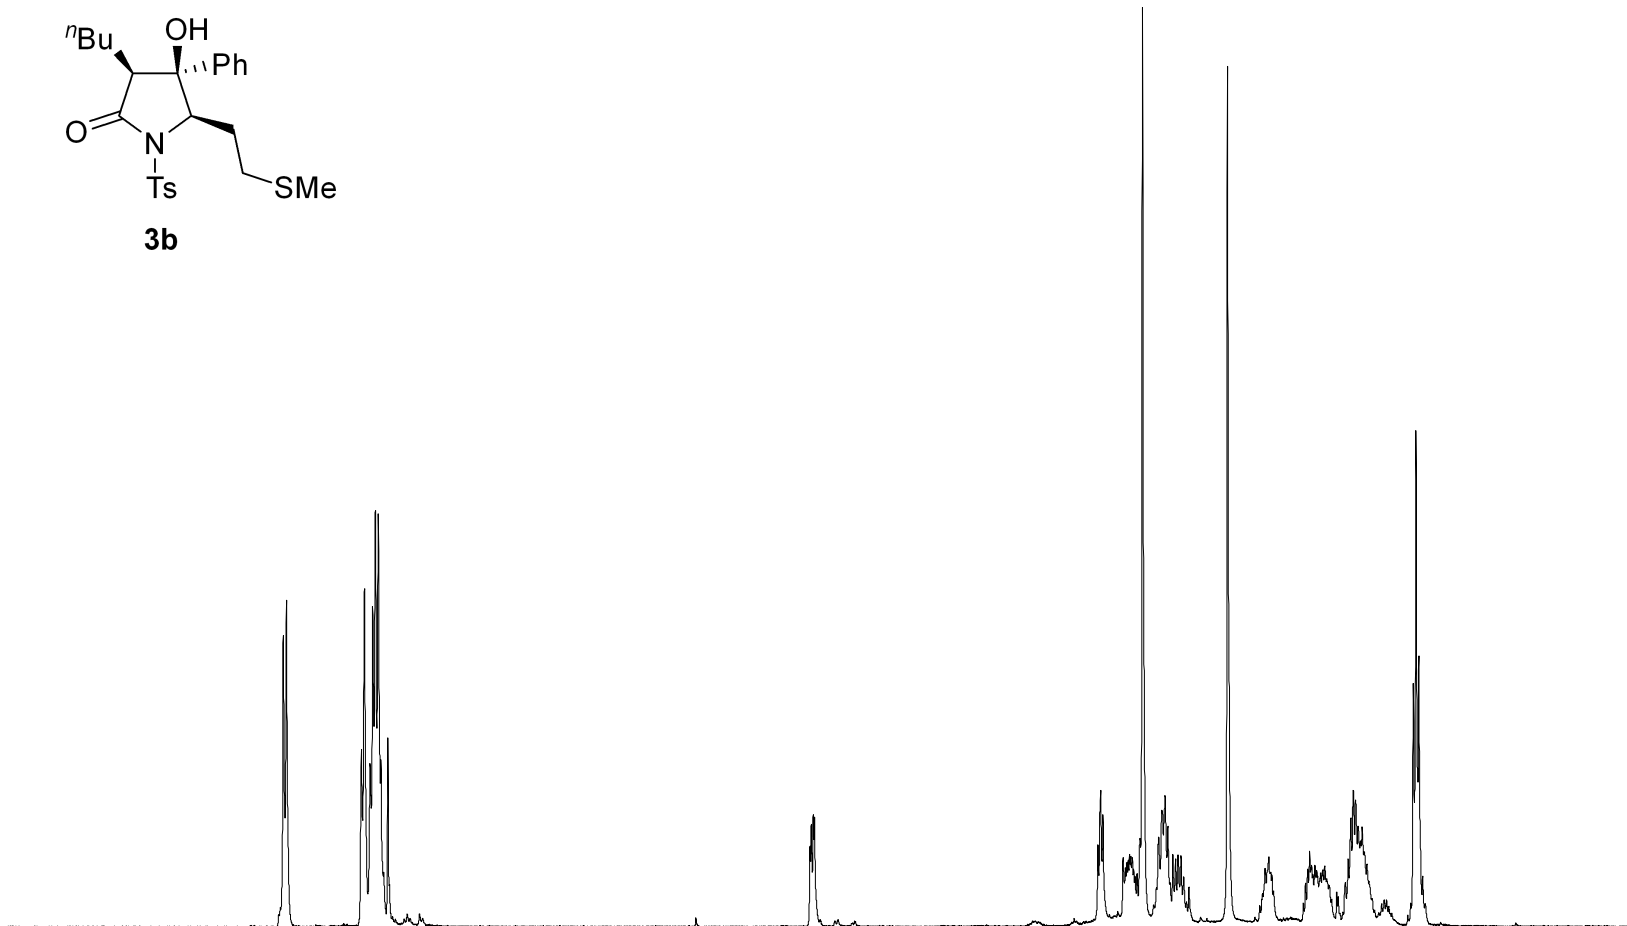

9 8 7 6 5 4 3 2 1 0 ppm

2.16

7.29

1.00

1.15

4.96

3.48

3.02

1.19

2.35

3.67

3.26



Current Data Parameters  
NAME qh-11127  
EXPNO 4  
PROCNO 1

F2 - Acquisition Parameters  
Date\_ 20150113  
Time 14.00  
INSTRUM spect  
PROBHD 5 mm DUL 13C-1  
PULPROG zgpg30  
TD 65536  
SOLVENT CDC13  
NS 209  
DS 2  
SWH 24038.461 Hz  
FIDRES 0.366798 Hz  
AQ 1.3631488 sec  
RG 196.92  
DW 20.800 usec  
DE 6.50 usec  
TE 296.4 K  
D1 2.00000000 sec  
D11 0.03000000 sec  
TD0 1

==== CHANNEL f1 =====  
SFO1 100.6228298 MHz  
NUC1 13C  
P1 9.60 usec  
PLW1 31.98900032 W

==== CHANNEL f2 =====  
SFO2 400.1316005 MHz  
NUC2 1H  
CPDPRG[2] waltz16  
PCPD2 90.00 usec  
PLW2 9.10000038 W  
PLW12 0.24608000 W  
PLW13 0.19933000 W

F2 - Processing parameters  
SI 32768  
SF 100.6127568 MHz  
WDW EM  
SSB 0  
LB 1.00 Hz  
GB 0  
PC 1.40

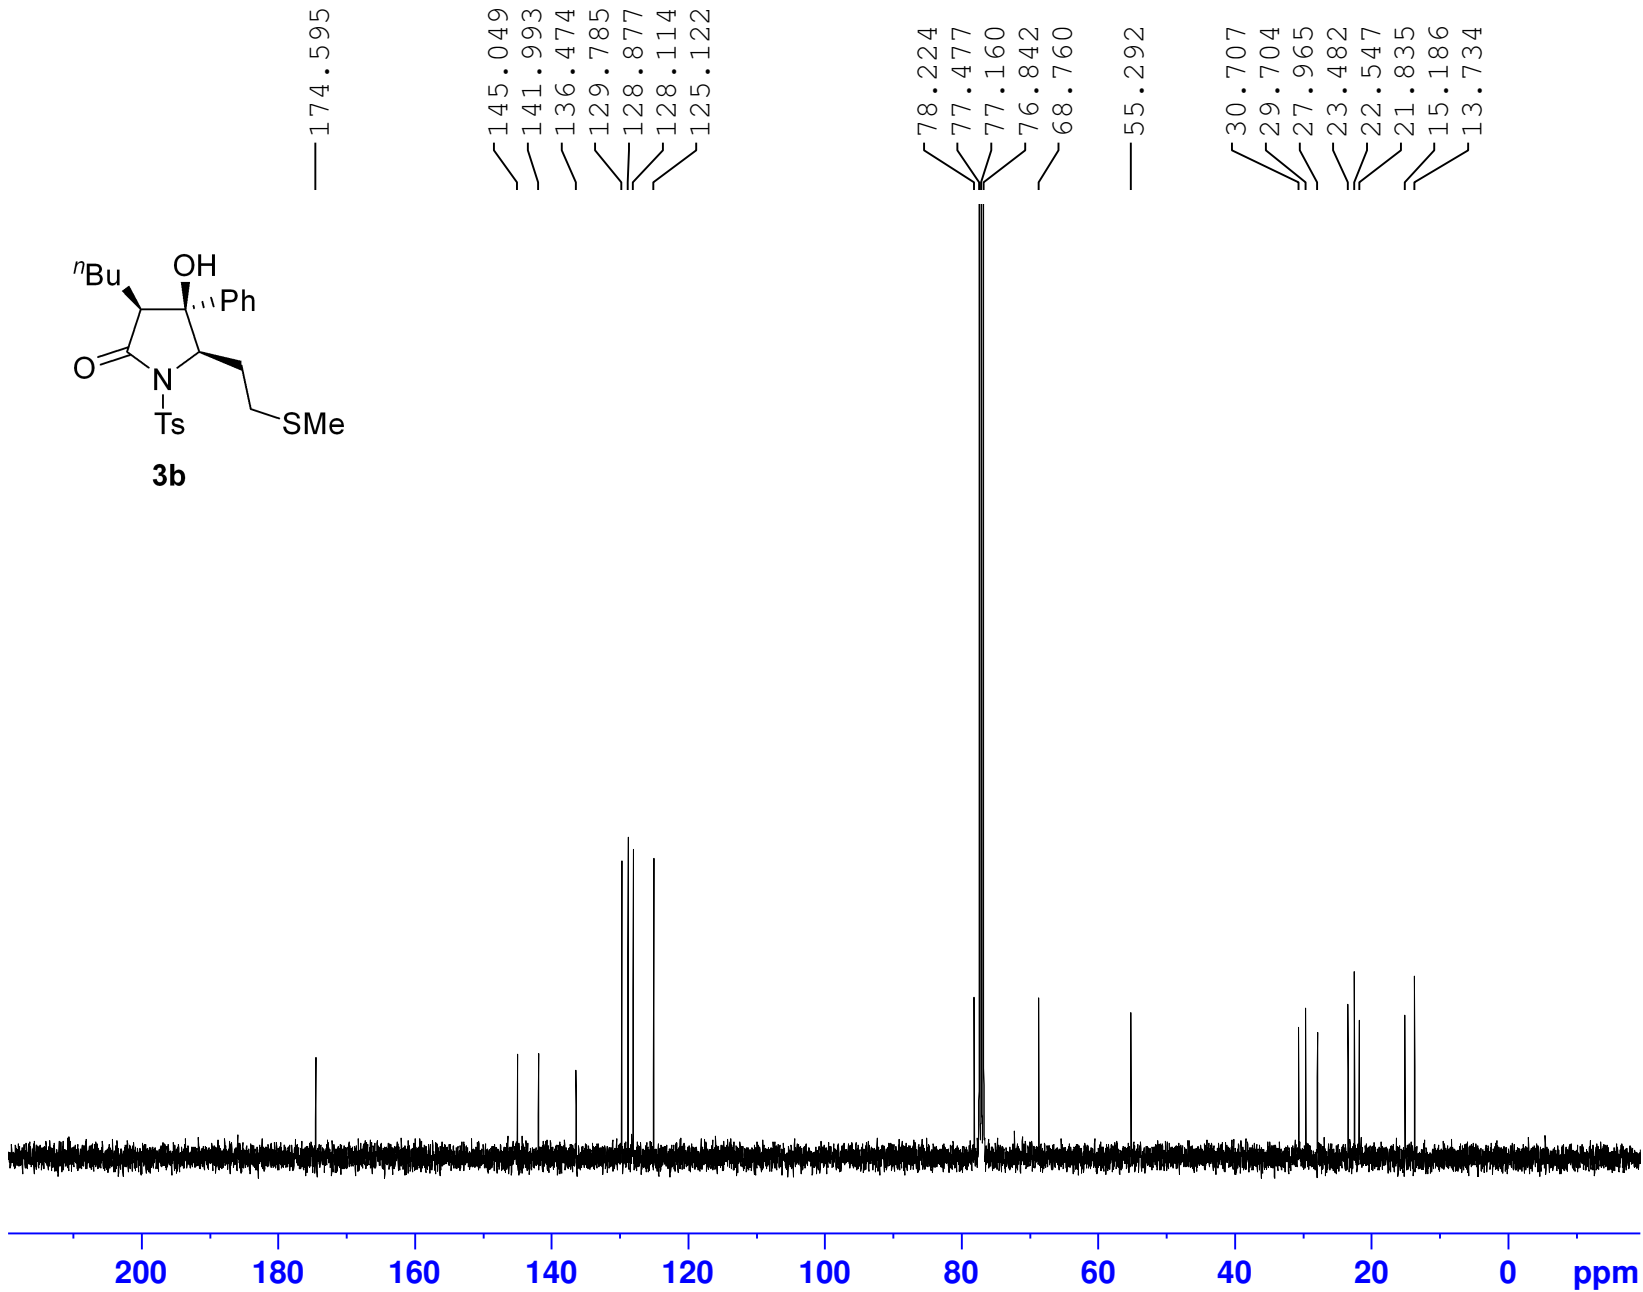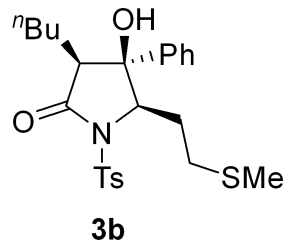



7.865  
7.846  
7.395  
7.379  
7.359  
7.352  
7.334  
7.311  
7.291  
7.263  
7.245  
7.226  
6.905  
6.893  
5.572  
3.019  
3.003  
2.987  
2.486  
1.803  
1.788  
1.780  
1.543  
1.531  
1.518  
1.508  
1.496  
1.293  
1.277  
1.262  
1.183  
1.160  
1.143  
1.137  
1.124  
1.120  
1.104  
1.087  
1.074  
1.056  
1.041  
0.934  
0.919  
0.901  
0.881  
0.740  
0.723  
0.705

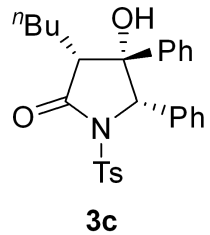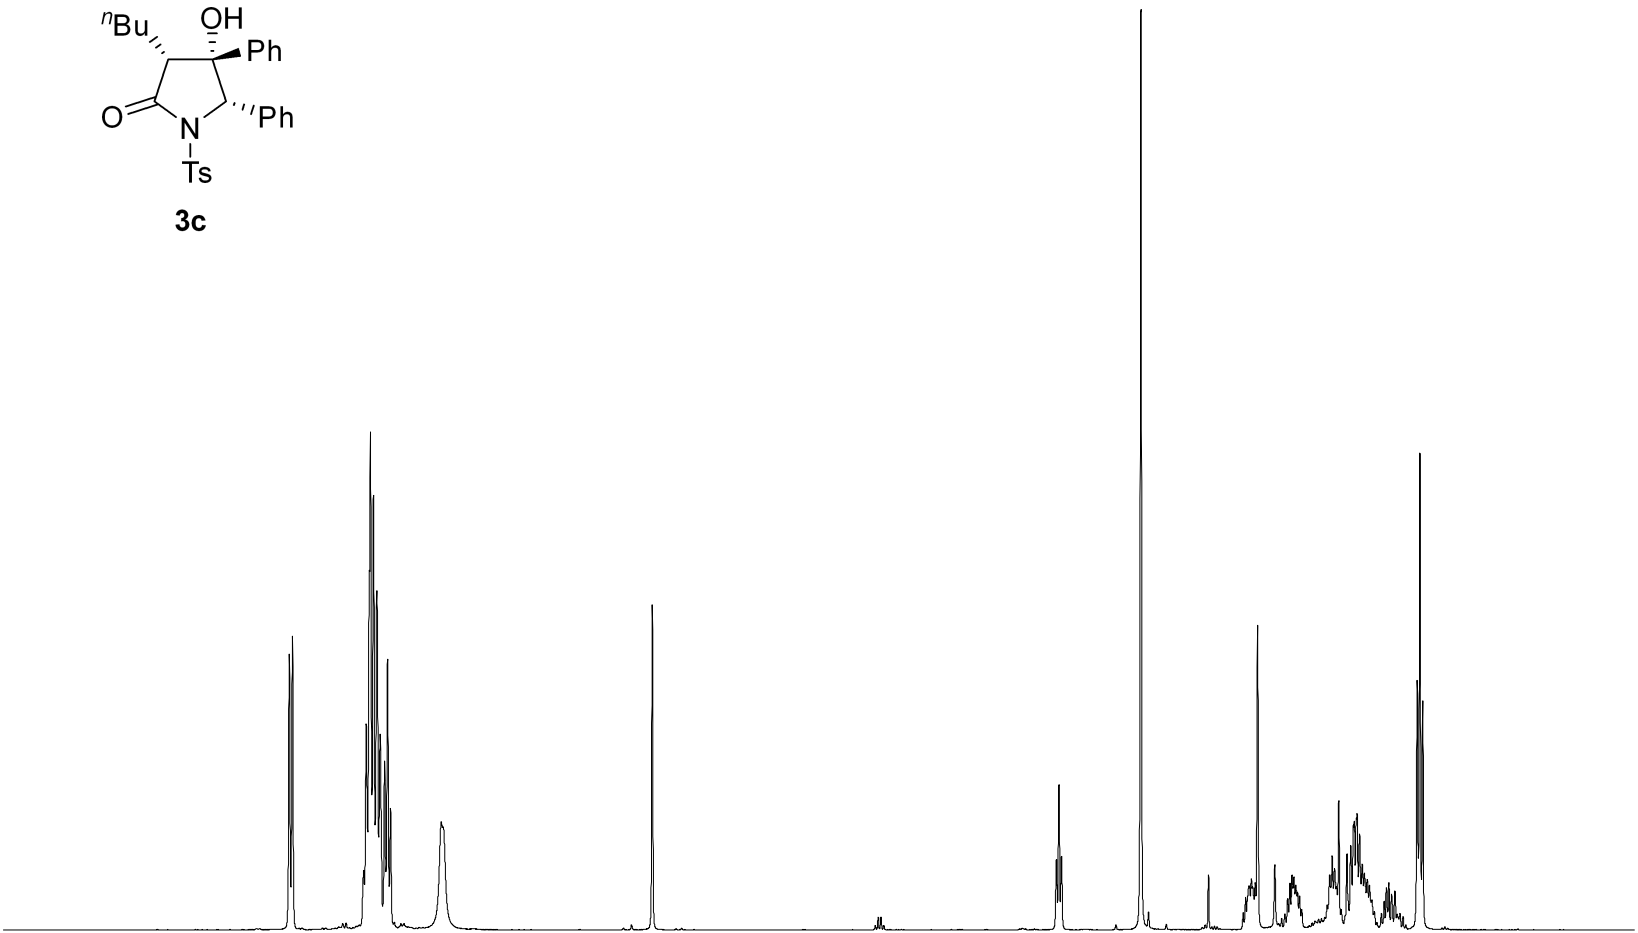

Current Data Parameters  
NAME qh-11131-3  
EXPNO 1  
PROCNO 1

F2 - Acquisition Parameters  
Date\_ 20150113  
Time 17.51  
INSTRUM spect  
PROBHD 5 mm DUL 13C-1  
PULPROG zg30  
TD 65536  
SOLVENT CDC13  
NS 3  
DS 0  
SWH 8012.820 Hz  
FIDRES 0.122266 Hz  
AQ 4.0894465 sec  
RG 27.78  
DW 62.400 usec  
DE 6.50 usec  
TE 295.7 K  
D1 1.00000000 sec  
TD0 1

==== CHANNEL f1 =====  
SFO1 400.1324710 MHz  
NUC1 1H  
P1 14.30 usec  
PLW1 9.10000038 W

F2 - Processing parameters  
SI 65536  
SF 400.1300000 MHz  
WDW EM  
SSB 0  
LB 0.30 Hz  
GB 0  
PC 1.00

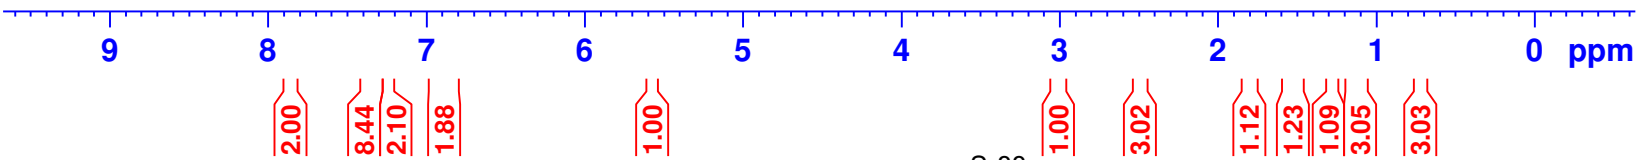



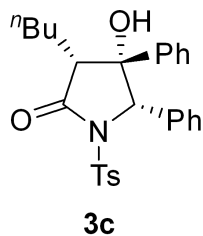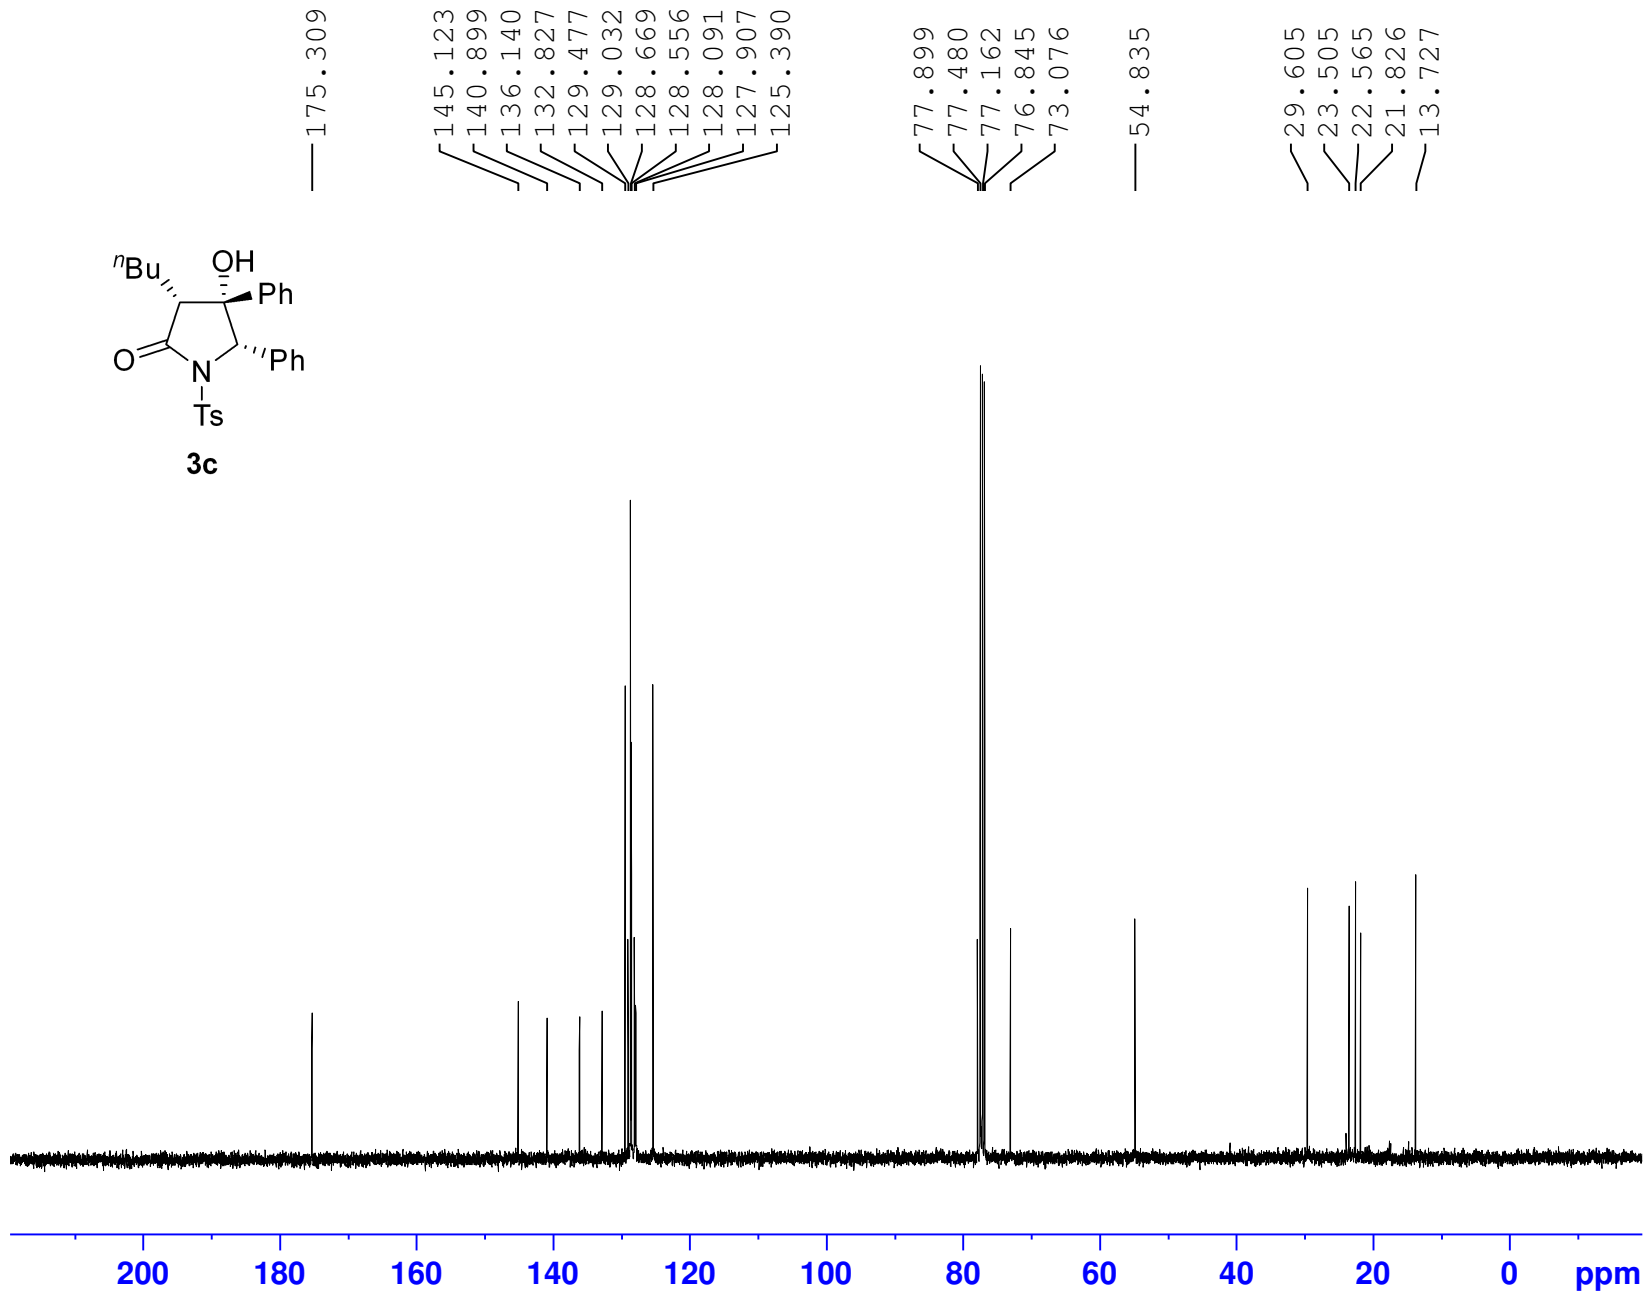

Current Data Parameters  
NAME qh-11131-3  
EXPNO 2  
PROCNO 1

F2 - Acquisition Parameters  
Date\_ 20150113  
Time 18.00  
INSTRUM spect  
PROBHD 5 mm DUL 13C-1  
PULPROG zgpg30  
TD 65536  
SOLVENT CDC13  
NS 158  
DS 2  
SWH 24038.461 Hz  
FIDRES 0.366798 Hz  
AQ 1.3631488 sec  
RG 196.92  
DW 20.800 usec  
DE 6.50 usec  
TE 296.6 K  
D1 2.00000000 sec  
D11 0.03000000 sec  
TD0 1

==== CHANNEL f1 =====  
SFO1 100.6228298 MHz  
NUC1 13C  
P1 9.60 usec  
PLW1 31.98900032 W

==== CHANNEL f2 =====  
SFO2 400.1316005 MHz  
NUC2 1H  
CPDPRG[2] waltz16  
PCPD2 90.00 usec  
PLW2 9.10000038 W  
PLW12 0.24608000 W  
PLW13 0.19933000 W

F2 - Processing parameters  
SI 32768  
SF 100.6127612 MHz  
WDW EM  
SSB 0  
LB 1.00 Hz  
GB 0  
PC 1.40



7.923  
7.903  
7.434  
7.414  
7.373  
7.355  
7.335  
7.326  
7.306  
7.294  
7.260  
4.452  
4.444  
4.431  
4.423  
2.809  
2.792  
2.778  
2.433  
2.098  
2.025  
2.003  
1.994  
1.785  
1.778  
1.764  
1.700  
1.669  
1.644  
1.497  
1.341  
1.309  
1.281  
1.258  
1.115  
1.099  
1.085  
1.069  
1.056  
1.044  
1.018  
0.714  
0.697  
0.679  
0.646  
0.630  
0.593  
0.577

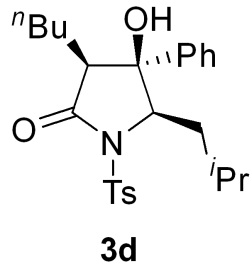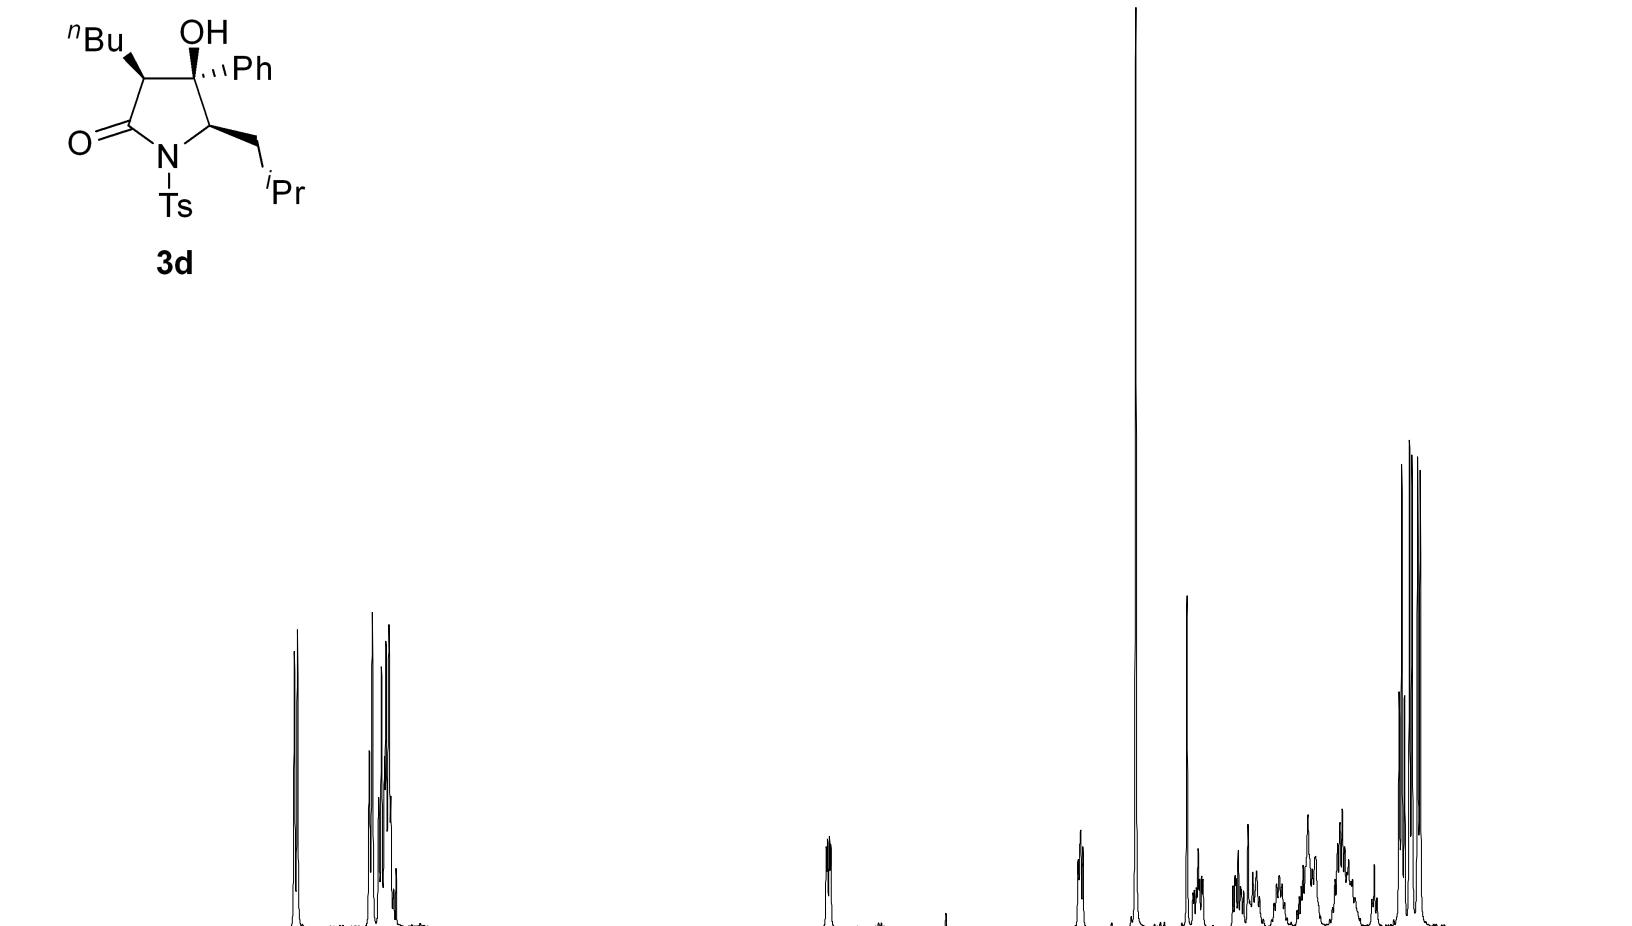

Current Data Parameters  
NAME qh-11131-2  
EXPNO 1  
PROCNO 1

F2 - Acquisition Parameters  
Date\_ 20150123  
Time 16.35  
INSTRUM spect  
PROBHD 5 mm DUL 13C-1  
PULPROG zg30  
TD 65536  
SOLVENT CDC13  
NS 2  
DS 0  
SWH 8012.820 Hz  
FIDRES 0.122266 Hz  
AQ 4.0894465 sec  
RG 27.78  
DW 62.400 usec  
DE 6.50 usec  
TE 295.7 K  
D1 1.00000000 sec  
TD0 1

==== CHANNEL f1 =====  
SFO1 400.1324710 MHz  
NUC1 1H  
P1 14.30 usec  
PLW1 9.10000038 W

F2 - Processing parameters  
SI 65536  
SF 400.1300097 MHz  
WDW EM  
SSB 0  
LB 0.30 Hz  
GB 0  
PC 1.00

2.00  
2.03  
5.08  
1.00  
1.00  
3.05  
0.99  
1.06  
1.01  
1.02  
1.02  
2.74  
3.36  
3.05  
3.03  
3.06

S-90

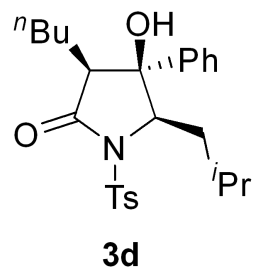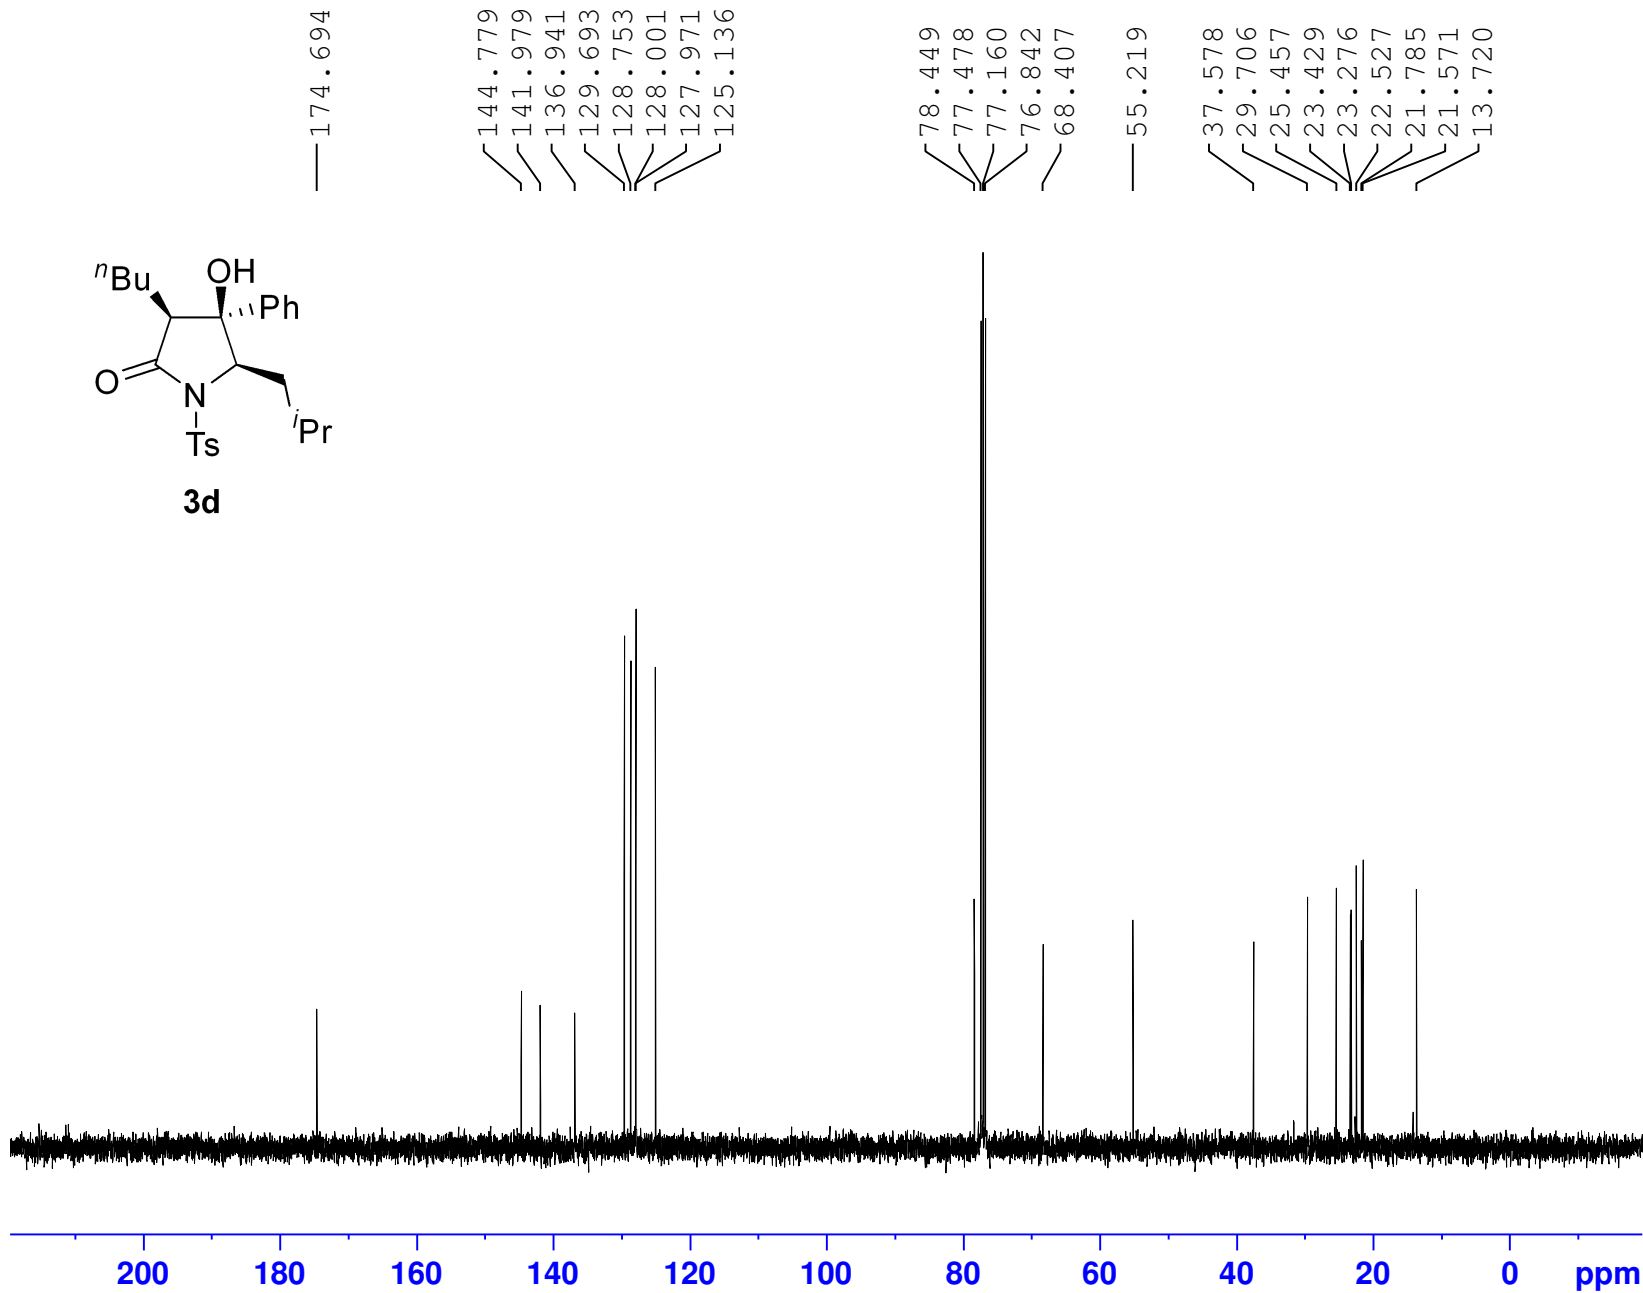

Current Data Parameters  
NAME qh-11131-2  
EXPNO 2  
PROCNO 1

F2 - Acquisition Parameters  
Date\_ 20150123  
Time 16.38  
INSTRUM spect  
PROBHD 5 mm DUL 13C-1  
PULPROG zgpg30  
TD 65536  
SOLVENT CDC13  
NS 53  
DS 2  
SWH 24038.461 Hz  
FIDRES 0.366798 Hz  
AQ 1.3631488 sec  
RG 196.92  
DW 20.800 usec  
DE 6.50 usec  
TE 296.4 K  
D1 2.00000000 sec  
D11 0.03000000 sec  
TD0 1

==== CHANNEL f1 =====  
SFO1 100.6228298 MHz  
NUC1 13C  
P1 9.60 usec  
PLW1 31.98900032 W

==== CHANNEL f2 =====  
SFO2 400.1316005 MHz  
NUC2 1H  
CPDPRG[2] waltz16  
PCPD2 90.00 usec  
PLW2 9.10000038 W  
PLW12 0.24608000 W  
PLW13 0.19933000 W

F2 - Processing parameters  
SI 32768  
SF 100.6127597 MHz  
WDW EM  
SSB 0  
LB 1.00 Hz  
GB 0  
PC 1.40



7.982  
7.961  
7.350  
7.330  
7.260  
7.090  
7.084  
7.080  
7.073  
7.064  
7.023  
7.014  
7.010  
7.005  
6.990  
6.980  
4.884  
4.874  
4.859  
4.850  
3.835  
3.825  
3.801  
3.791  
3.085  
3.060  
3.051  
3.026  
2.760  
2.747  
2.742  
2.728  
2.455  
2.236  
1.668  
1.367  
1.334  
1.323  
1.109  
1.102  
1.091  
1.089  
1.074  
1.056  
1.042  
0.710  
0.692  
0.674

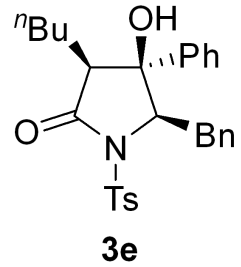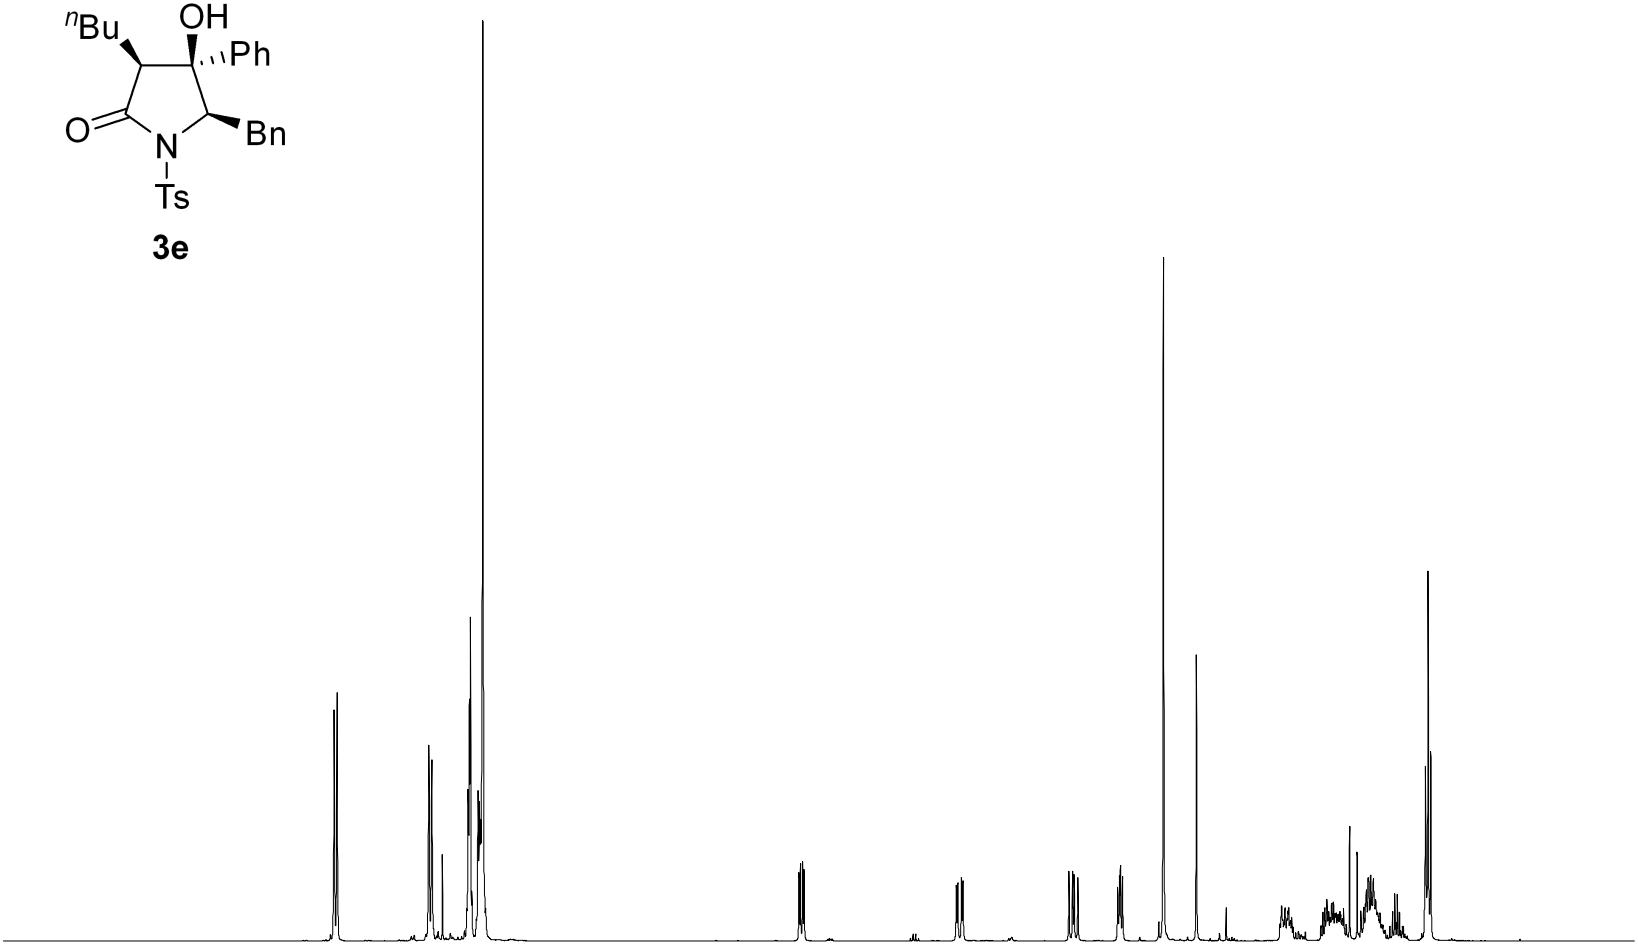

Current Data Parameters  
NAME qh-11134-1  
EXPNO 1  
PROCNO 1

F2 - Acquisition Parameters  
Date\_ 20150115  
Time 9.42  
INSTRUM spect  
PROBHD 5 mm DUL 13C-1  
PULPROG zg30  
TD 65536  
SOLVENT CDC13  
NS 2  
DS 0  
SWH 8012.820 Hz  
FIDRES 0.122266 Hz  
AQ 4.0894465 sec  
RG 27.78  
DW 62.400 usec  
DE 6.50 usec  
TE 295.5 K  
D1 1.00000000 sec  
TD0 1

==== CHANNEL f1 =====  
SFO1 400.1324710 MHz  
NUC1 1H  
P1 14.30 usec  
PLW1 9.10000038 W

F2 - Processing parameters  
SI 65536  
SF 400.1300095 MHz  
WDW EM  
SSB 0  
LB 0.30 Hz  
GB 0  
PC 1.00

10 9 8 7 6 5 4 3 2 1 0 ppm

2.05  
2.15  
3.14  
7.17  
1.00  
1.00  
1.03  
3.04  
0.97  
1.13  
2.03  
3.11  
3.14

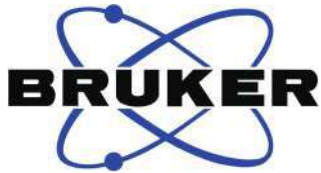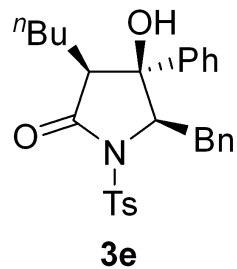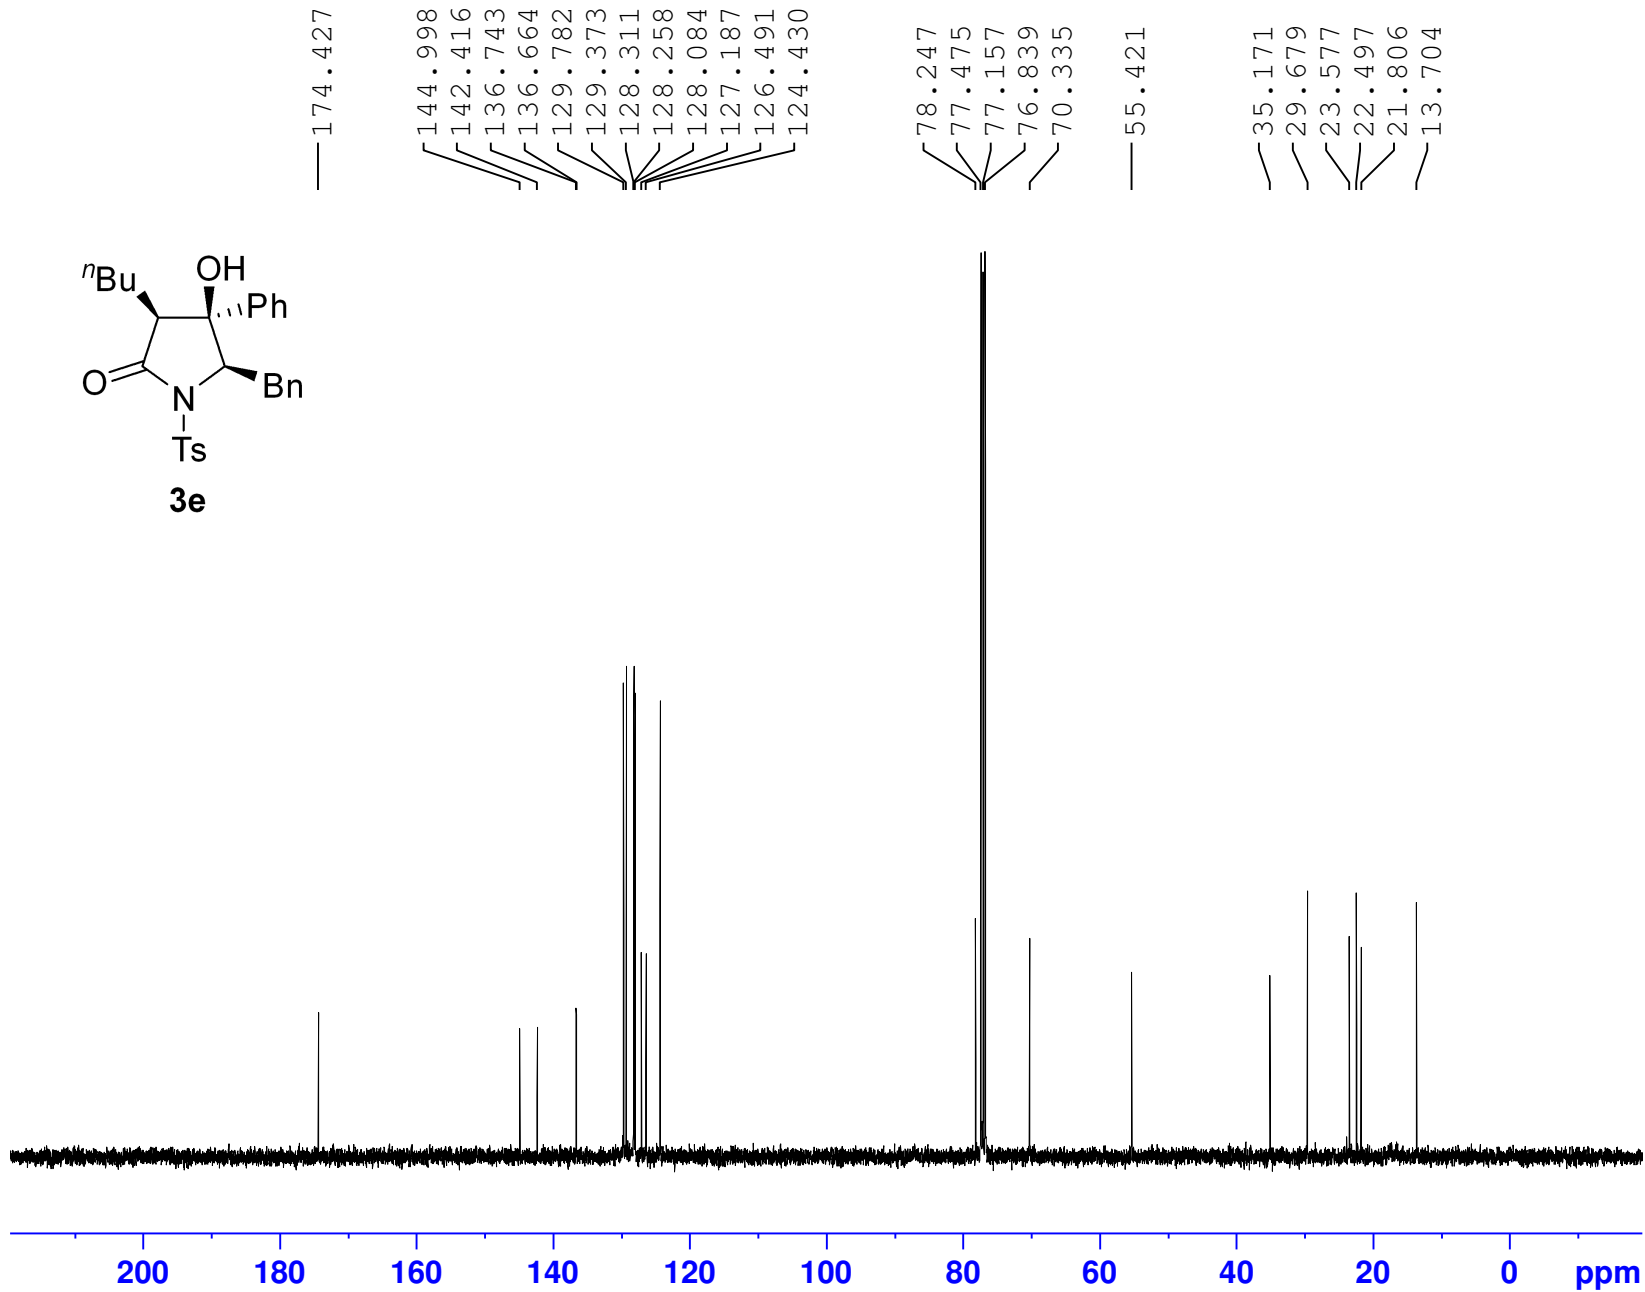

Current Data Parameters  
NAME qh-11134-1  
EXPNO 2  
PROCNO 1

F2 - Acquisition Parameters  
Date\_ 20150115  
Time 9.50  
INSTRUM spect  
PROBHD 5 mm DUL 13C-1  
PULPROG zgpg30  
TD 65536  
SOLVENT CDC13  
NS 130  
DS 2  
SWH 24038.461 Hz  
FIDRES 0.366798 Hz  
AQ 1.3631488 sec  
RG 196.92  
DW 20.800 usec  
DE 6.50 usec  
TE 296.4 K  
D1 2.00000000 sec  
D11 0.03000000 sec  
TD0 1

==== CHANNEL f1 =====  
SFO1 100.6228298 MHz  
NUC1 13C  
P1 9.60 usec  
PLW1 31.98900032 W

==== CHANNEL f2 =====  
SFO2 400.1316005 MHz  
NUC2 1H  
CPDPRG[2] waltz16  
PCPD2 90.00 usec  
PLW2 9.10000038 W  
PLW12 0.24608000 W  
PLW13 0.19933000 W

F2 - Processing parameters  
SI 32768  
SF 100.6127612 MHz  
WDW EM  
SSB 0  
LB 1.00 Hz  
GB 0  
PC 1.40

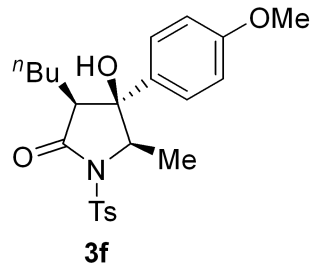

7.940  
7.919  
7.343  
7.320  
7.298  
7.260  
6.909  
6.887

4.353  
4.338  
4.322  
4.306  
3.802  
2.839  
2.825  
2.808  
2.418  
2.090  
1.671  
1.648  
1.627  
1.388  
1.373  
1.312  
1.300  
1.290  
1.282  
1.271  
1.256  
1.142  
1.127  
1.123  
1.109  
1.091  
1.071  
1.051

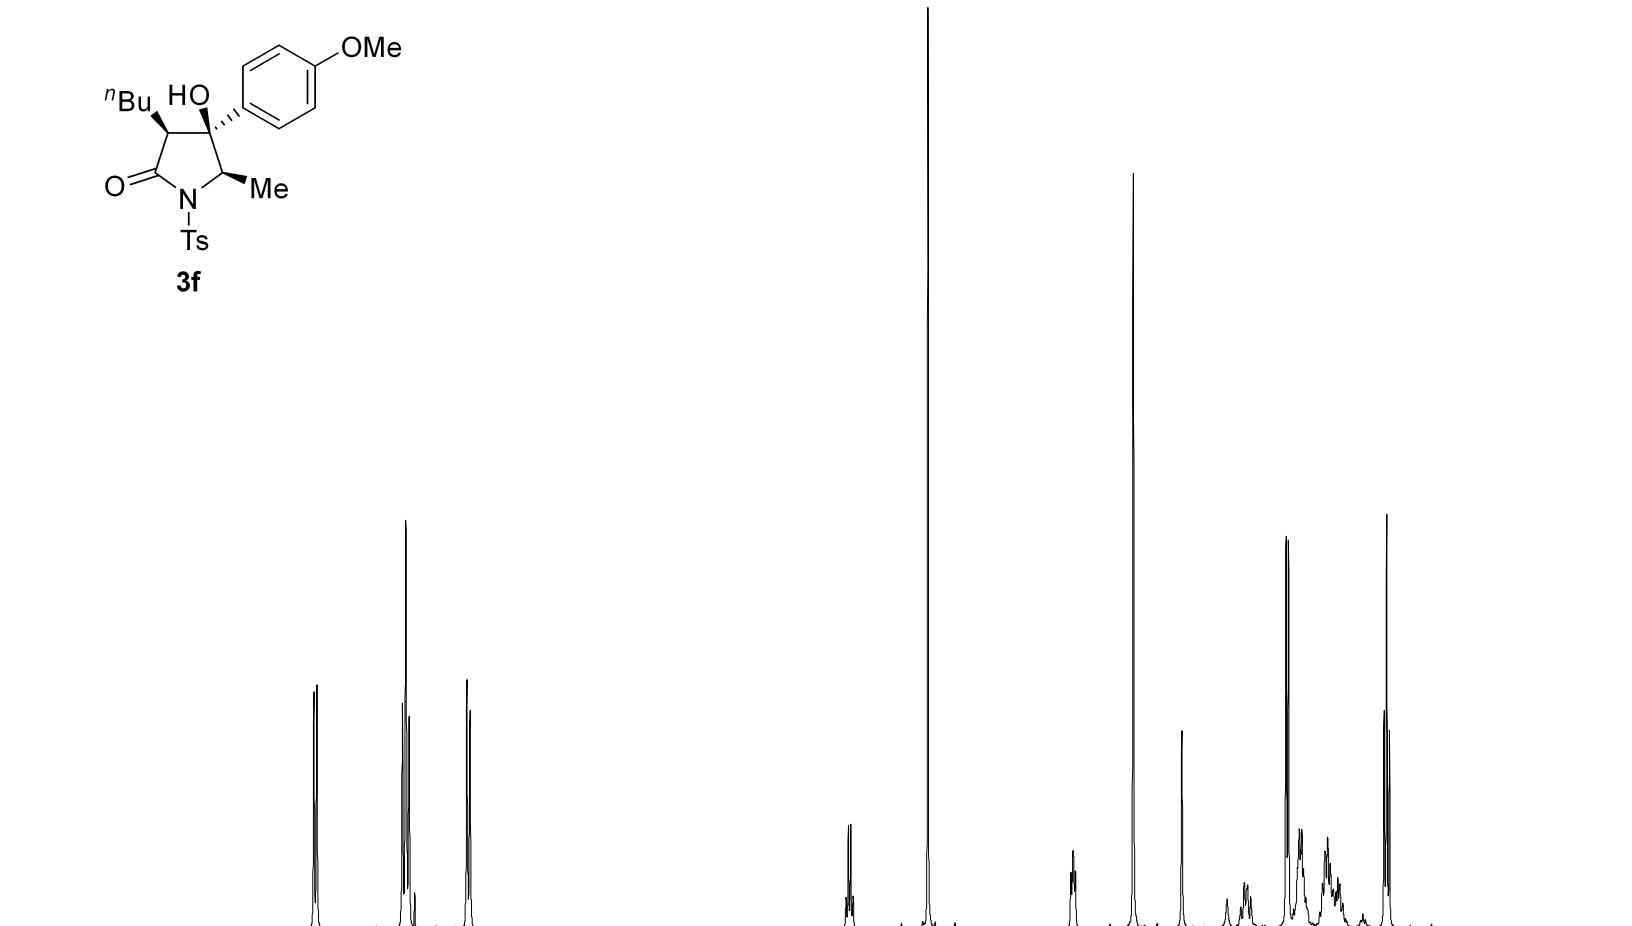

Current Data Parameters  
NAME qh-11145-1  
EXPNO 3  
PROCNO 1

F2 - Acquisition Parameters  
Date\_ 20150401  
Time 18.31  
INSTRUM spect  
PROBHD 5 mm PABBO BB/  
PULPROG zg30  
TD 65536  
SOLVENT CDCl3  
NS 2  
DS 0  
SWH 8012.820 Hz  
FIDRES 0.122266 Hz  
AQ 4.0894465 sec  
RG 27.78  
DW 62.400 usec  
DE 6.50 usec  
TE 296.4 K  
D1 1.00000000 sec  
TD0 1

==== CHANNEL f1 =====  
SFO1 400.1324710 MHz  
NUC1 1H  
P1 14.50 usec  
PLW1 11.99499989 W

F2 - Processing parameters  
SI 65536  
SF 400.1300088 MHz  
WDW EM  
SSB 0  
LB 0.30 Hz  
GB 0  
PC 1.00

2.00  
4.03  
2.01

1.00  
3.05  
0.99  
3.05  
0.95  
1.05  
3.02  
2.31  
3.17  
3.03

S-94

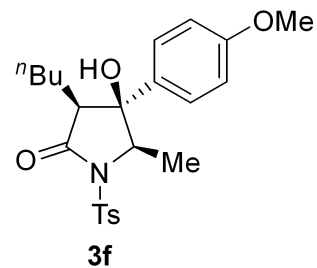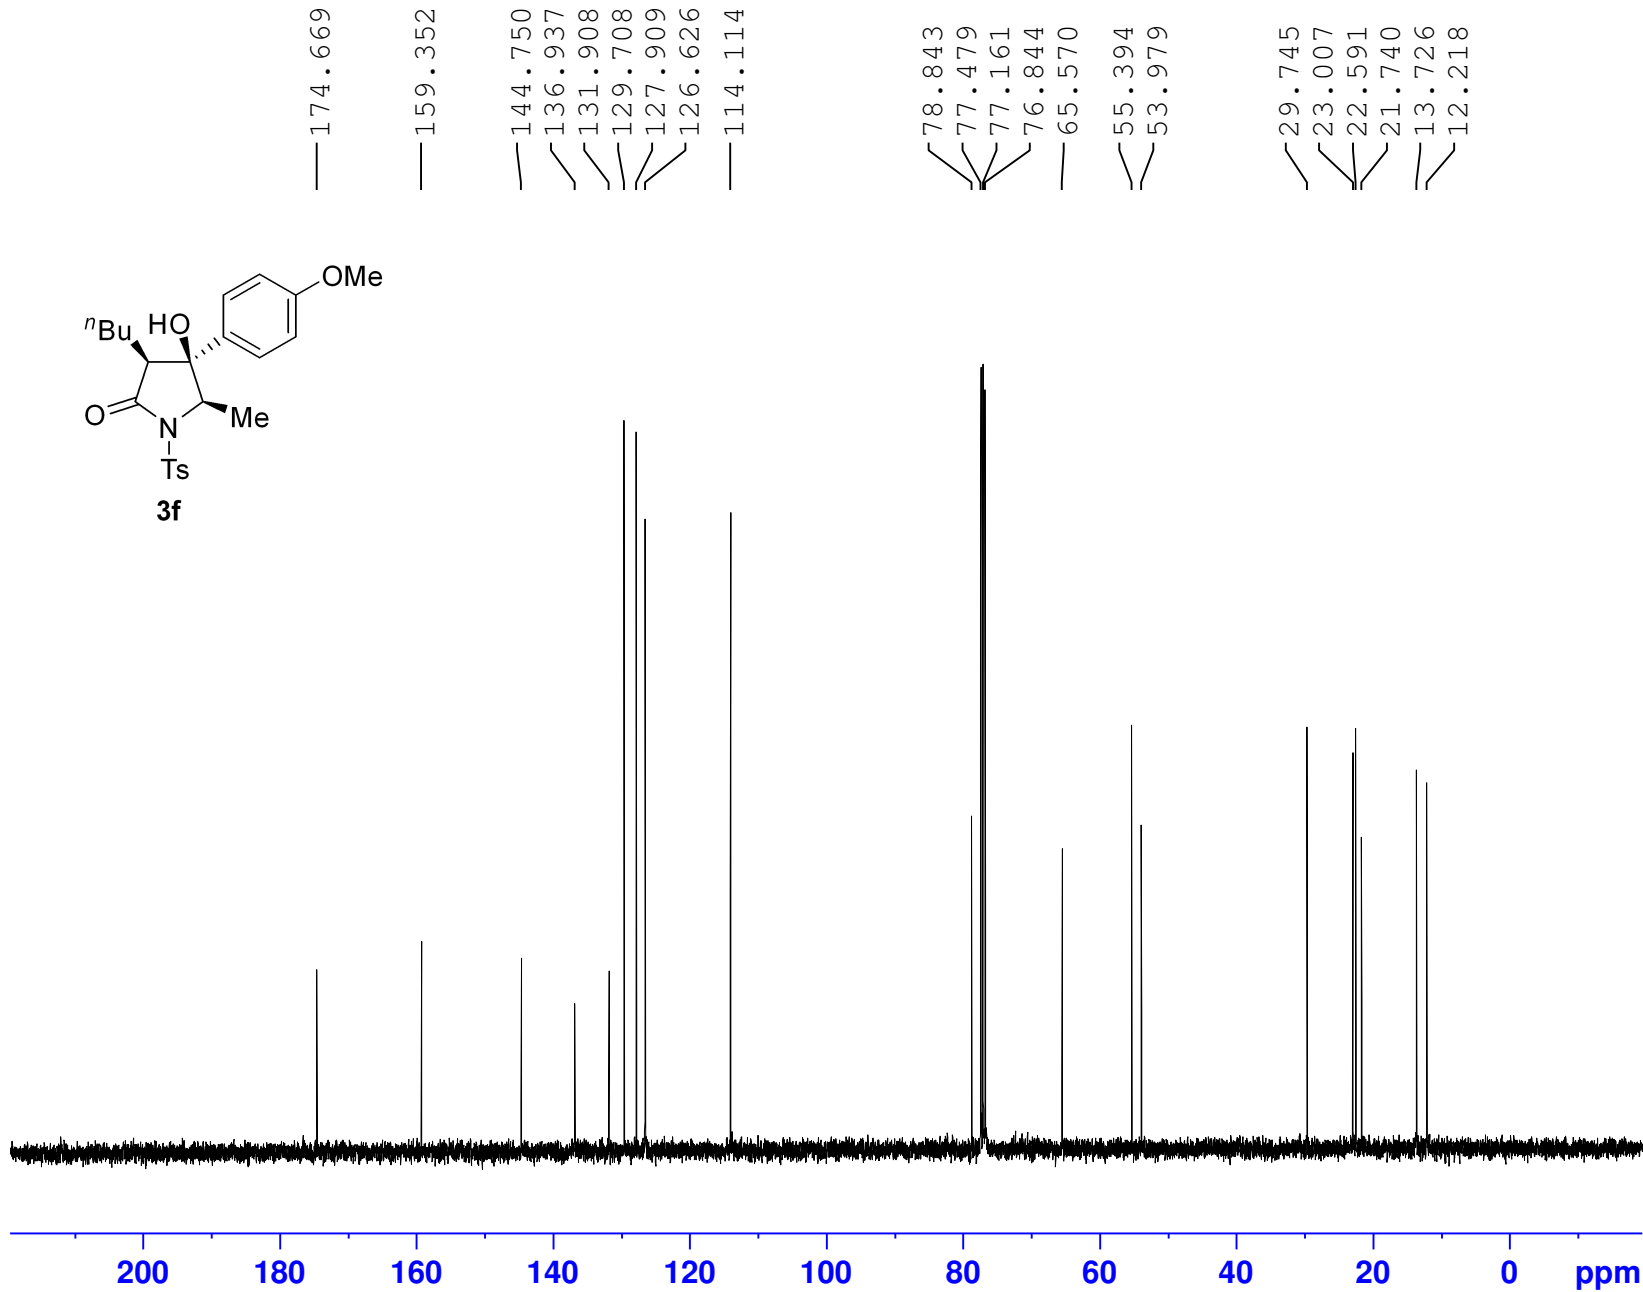

Current Data Parameters  
NAME qh-11145-1  
EXPNO 4  
PROCNO 1

F2 - Acquisition Parameters  
Date\_ 20150401  
Time 18.35  
INSTRUM spect  
PROBHD 5 mm PABBO BB/  
PULPROG zgpg30  
TD 65536  
SOLVENT CDC13  
NS 53  
DS 2  
SWH 24038.461 Hz  
FIDRES 0.366798 Hz  
AQ 1.3631488 sec  
RG 196.92  
DW 20.800 usec  
DE 6.50 usec  
TE 297.3 K  
D1 2.00000000 sec  
D11 0.03000000 sec  
TD0 1

==== CHANNEL f1 =====  
SFO1 100.6228298 MHz  
NUC1 13C  
P1 9.70 usec  
PLW1 46.98899841 W

==== CHANNEL f2 =====  
SFO2 400.1316005 MHz  
NUC2 1H  
CPDPRG[2] waltz16  
PCPD2 90.00 usec  
PLW2 11.99499989 W  
PLW12 0.34213999 W  
PLW13 0.27713001 W

F2 - Processing parameters  
SI 32768  
SF 100.6127620 MHz  
WDW EM  
SSB 0  
LB 1.00 Hz  
GB 0  
PC 1.40



7.937  
7.917  
7.318  
7.298  
7.291  
7.270  
7.259  
6.989  
6.977  
6.957  
6.854  
6.833  
5.280  
4.371  
4.356  
3.800  
3.706  
3.691  
3.676  
2.859  
2.844  
2.829  
2.418  
2.266  
1.832  
1.824  
1.816  
1.809  
1.801  
1.672  
1.650  
1.391  
1.375  
1.305  
1.296  
1.286  
1.274  
1.253  
1.136  
1.118  
1.103  
1.086  
1.067  
1.037  
1.027  
0.719  
0.702  
0.684

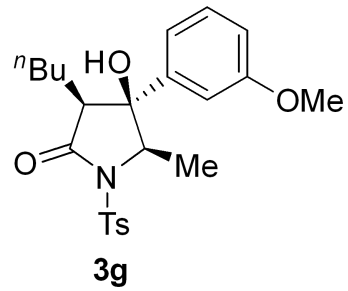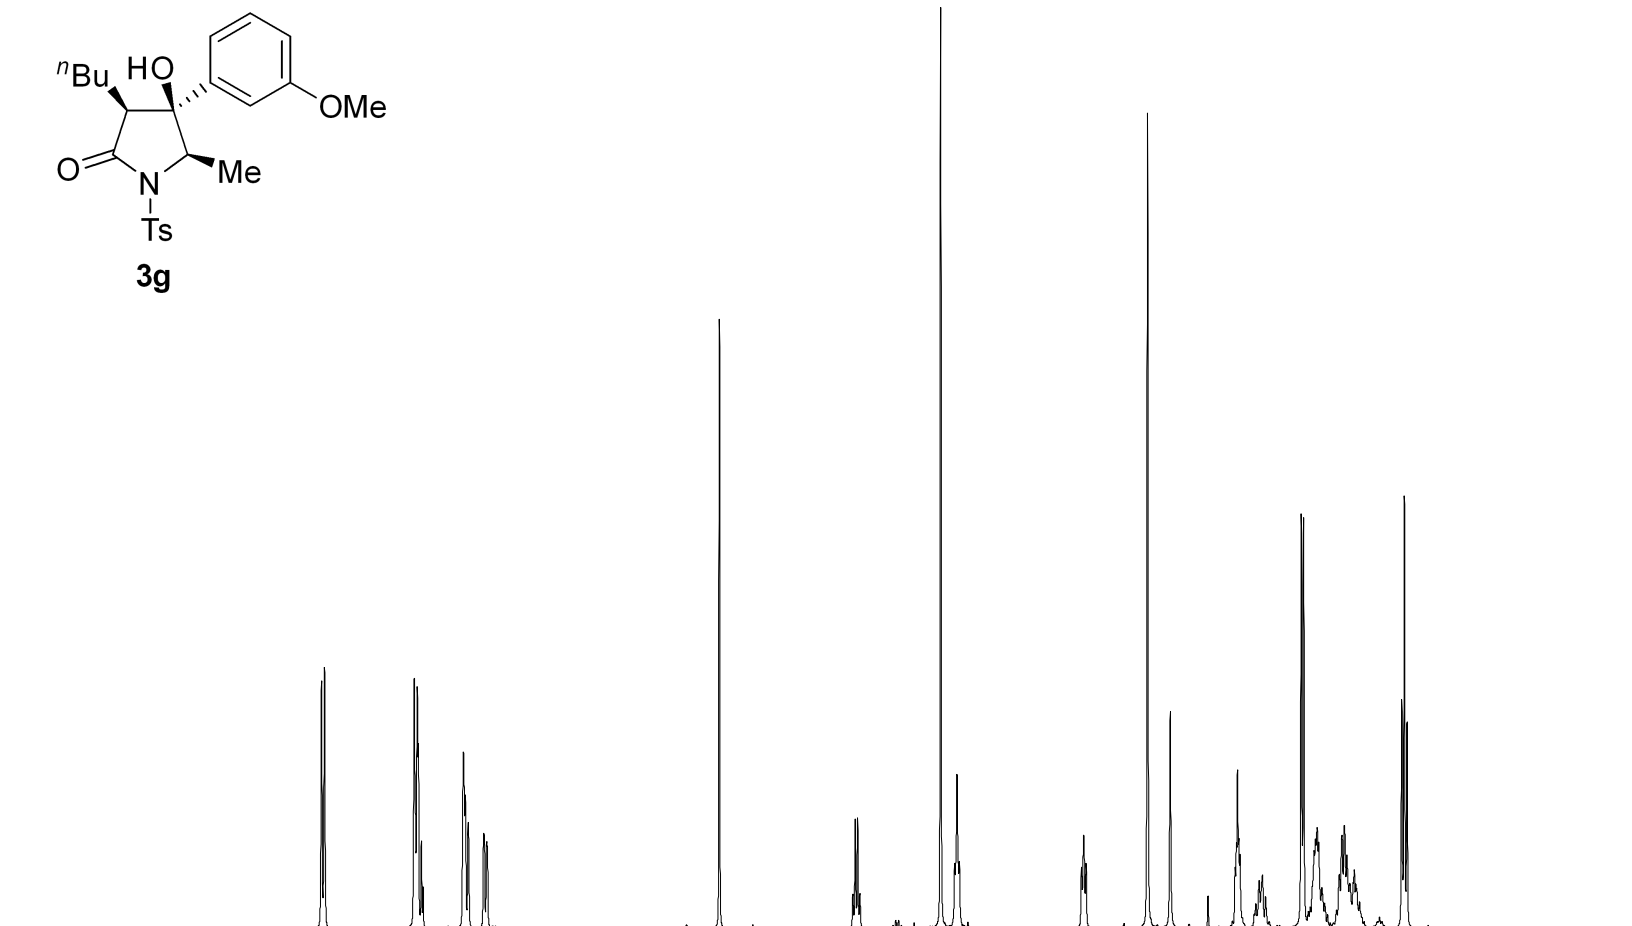

2.01  
3.02  
2.01  
1.00  
1.82  
1.00  
3.05  
1.43  
1.00  
3.05  
0.99  
1.58  
1.03  
3.03  
2.33  
3.07  
3.02

S-96

Current Data Parameters  
NAME qh-11154-3  
EXPNO 1  
PROCNO 1

F2 - Acquisition Parameters  
Date\_ 20150122  
Time 19.30  
INSTRUM spect  
PROBHD 5 mm DUL 13C-1  
PULPROG zg30  
TD 65536  
SOLVENT CDC13  
NS 2  
DS 0  
SWH 8012.820 Hz  
FIDRES 0.122266 Hz  
AQ 4.0894465 sec  
RG 25.32  
DW 62.400 usec  
DE 6.50 usec  
TE 295.9 K  
D1 1.00000000 sec  
TD0 1

==== CHANNEL f1 =====  
SFO1 400.1324710 MHz  
NUC1 1H  
P1 14.30 usec  
PLW1 9.10000038 W

F2 - Processing parameters  
SI 65536  
SF 400.1300099 MHz  
WDW EM  
SSB 0  
LB 0.30 Hz  
GB 0  
PC 1.00



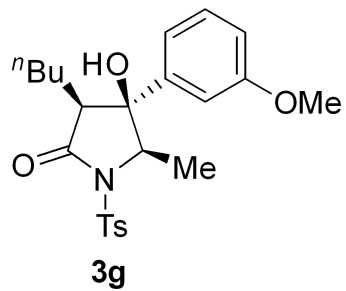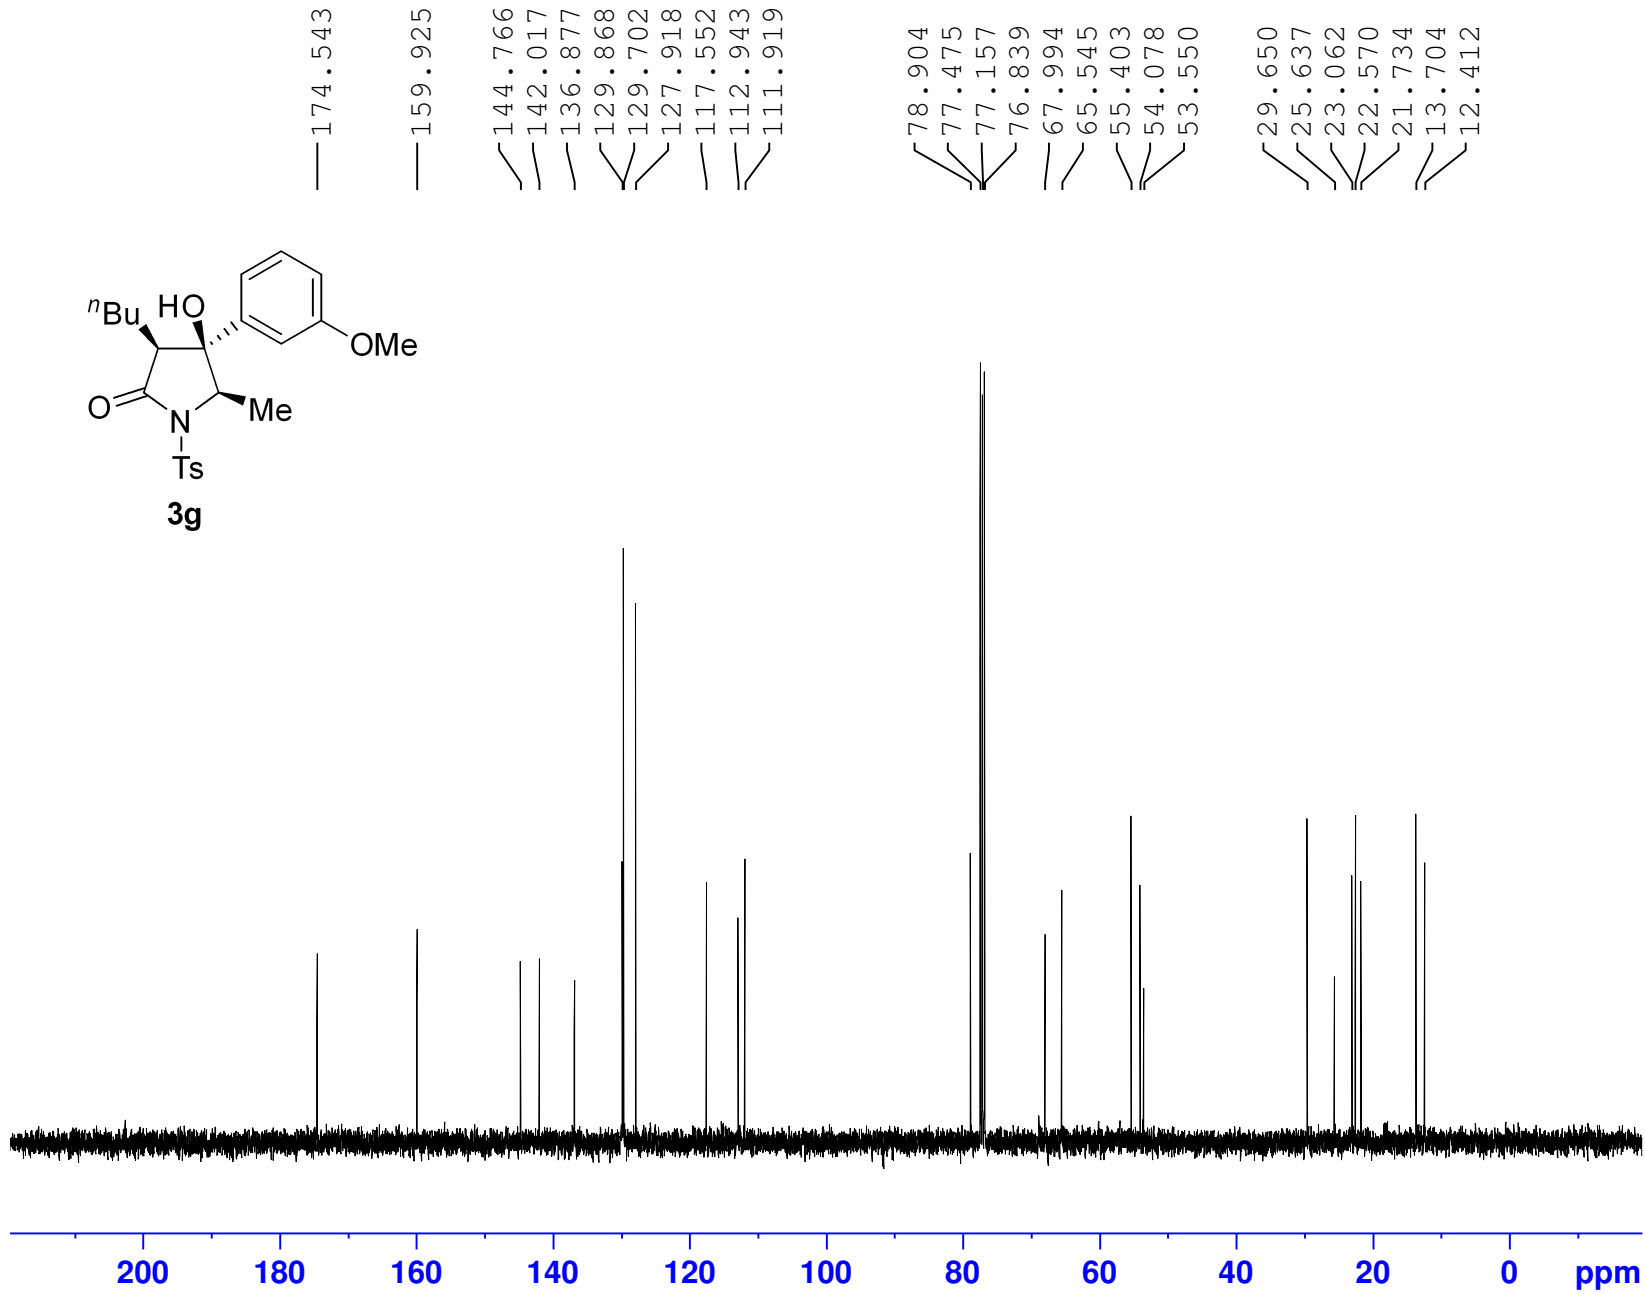

Current Data Parameters  
NAME qh-11154-3  
EXPNO 2  
PROCNO 1

F2 - Acquisition Parameters  
Date\_ 20150122  
Time 19.33  
INSTRUM spect  
PROBHD 5 mm DUL 13C-1  
PULPROG zgpg30  
TD 65536  
SOLVENT CDC13  
NS 49  
DS 2  
SWH 24038.461 Hz  
FIDRES 0.366798 Hz  
AQ 1.3631488 sec  
RG 196.92  
DW 20.800 usec  
DE 6.50 usec  
TE 296.4 K  
D1 2.00000000 sec  
D11 0.03000000 sec  
TD0 1

==== CHANNEL f1 =====  
SFO1 100.6228298 MHz  
NUC1 13C  
P1 9.60 usec  
PLW1 31.98900032 W

==== CHANNEL f2 =====  
SFO2 400.1316005 MHz  
NUC2 1H  
CPDPRG[2] waltz16  
PCPD2 90.00 usec  
PLW2 9.10000038 W  
PLW12 0.24608000 W  
PLW13 0.19933000 W

F2 - Processing parameters  
SI 32768  
SF 100.6127626 MHz  
WDW EM  
SSB 0  
LB 1.00 Hz  
GB 0  
PC 1.40



7.929  
7.909  
7.397  
7.375  
7.356  
7.334  
7.325  
7.305  
7.260  
4.352  
4.336  
4.320  
4.305  
2.841  
2.826  
2.810  
2.425  
2.208  
1.706  
1.687  
1.660  
1.642  
1.387  
1.371  
1.325  
1.312  
1.299  
1.281  
1.266  
1.256  
1.237  
1.221  
1.210  
1.133  
1.120  
1.114  
1.102  
1.097  
1.081  
1.062  
1.039  
1.020  
1.003  
0.993  
0.975  
0.724  
0.706  
0.688

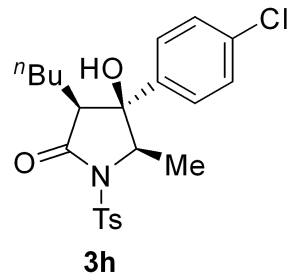

Current Data Parameters  
NAME qh-11154-1  
EXPNO 1  
PROCNO 1

F2 - Acquisition Parameters  
Date\_ 20150122  
Time 19.20  
INSTRUM spect  
PROBHD 5 mm DUL 13C-1  
PULPROG zg30  
TD 65536  
SOLVENT CDC13  
NS 3  
DS 0  
SWH 8012.820 Hz  
FIDRES 0.122266 Hz  
AQ 4.0894465 sec  
RG 45.67  
DW 62.400 usec  
DE 6.50 usec  
TE 295.6 K  
D1 1.00000000 sec  
TD0 1

==== CHANNEL f1 =====  
SFO1 400.1324710 MHz  
NUC1 1H  
P1 14.30 usec  
PLW1 9.10000038 W

F2 - Processing parameters  
SI 65536  
SF 400.1300093 MHz  
WDW EM  
SSB 0  
LB 0.30 Hz  
GB 0  
PC 1.00

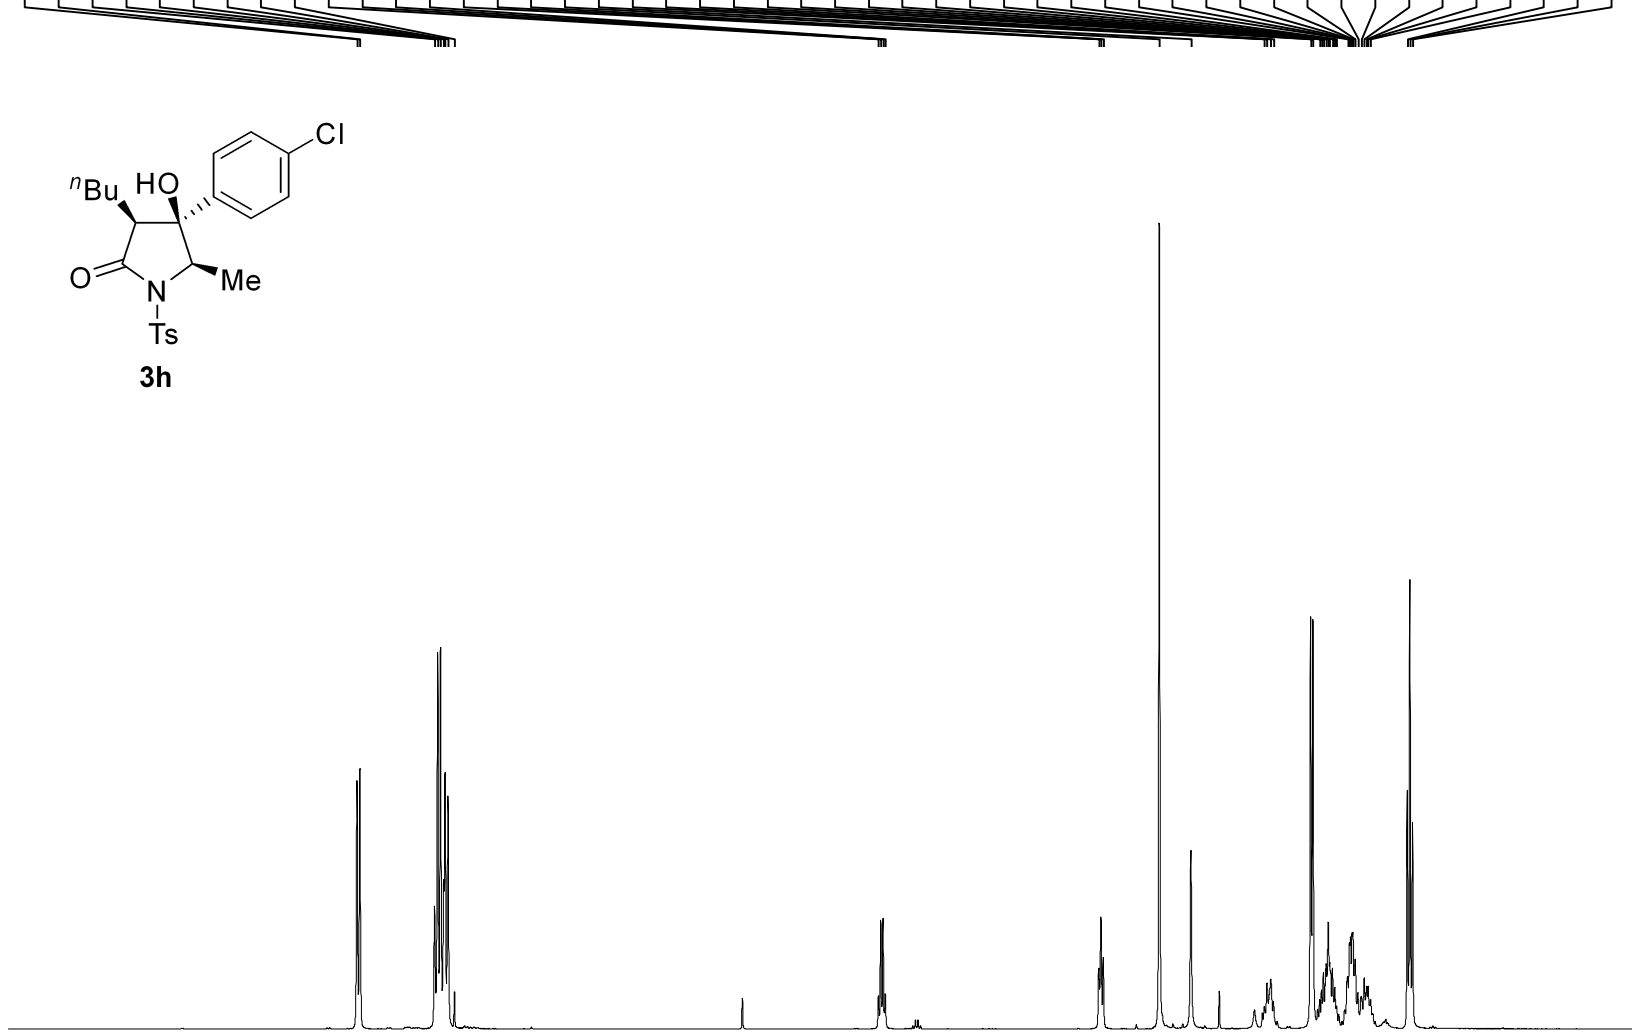

10 9 8 7 6 5 4 3 2 1 0 ppm

2.00  
6.10  
1.00  
1.00  
3.07  
0.96  
1.03  
3.02  
2.43  
2.21  
1.16  
3.03

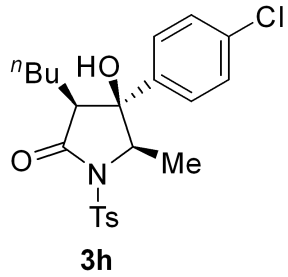

— 174.229

144.952  
 138.835  
 136.696  
 134.141  
 129.772  
 128.951  
 127.952  
 126.974

78.749  
 77.481  
 77.163  
 76.846  
 65.481  
 — 54.056

29.700  
 23.088  
 22.571  
 21.776  
 13.707  
 12.382

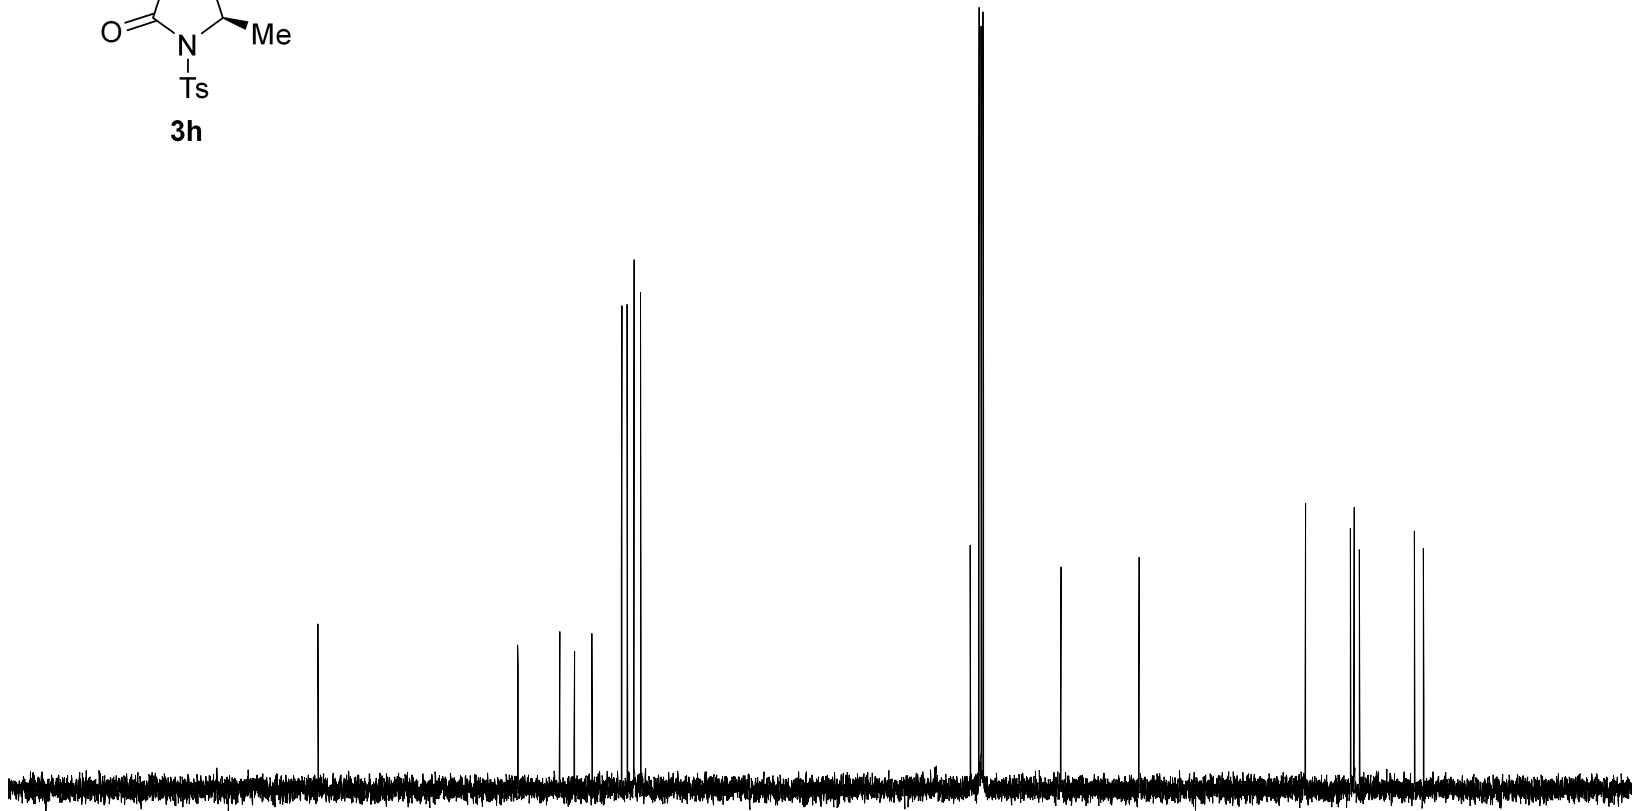

Current Data Parameters  
 NAME qh-11154-1  
 EXPNO 2  
 PROCNO 1

F2 - Acquisition Parameters  
 Date\_ 20150122  
 Time 19.22  
 INSTRUM spect  
 PROBHD 5 mm DUL 13C-1  
 PULPROG zgpg30  
 TD 65536  
 SOLVENT CDC13  
 NS 42  
 DS 2  
 SWH 24038.461 Hz  
 FIDRES 0.366798 Hz  
 AQ 1.3631488 sec  
 RG 196.92  
 DW 20.800 usec  
 DE 6.50 usec  
 TE 296.3 K  
 D1 2.00000000 sec  
 D11 0.03000000 sec  
 TD0 1

===== CHANNEL f1 =====  
 SFO1 100.6228298 MHz  
 NUC1 13C  
 P1 9.60 usec  
 PLW1 31.98900032 W

===== CHANNEL f2 =====  
 SFO2 400.1316005 MHz  
 NUC2 1H  
 CPDPRG[2] waltz16  
 PCPD2 90.00 usec  
 PLW2 9.10000038 W  
 PLW12 0.24608000 W  
 PLW13 0.19933000 W

F2 - Processing parameters  
 SI 32768  
 SF 100.6127612 MHz  
 WDW EM  
 SSB 0  
 LB 1.00 Hz  
 GB 0  
 PC 1.40



7.933  
7.912  
7.438  
7.433  
7.425  
7.421  
7.416  
7.408  
7.403  
7.323  
7.303  
7.260  
7.084  
7.079  
7.063  
7.046  
7.041  
4.347  
4.331  
2.847  
2.832  
2.830  
2.815  
2.421  
2.223  
1.687  
1.657  
1.390  
1.374  
1.317  
1.303  
1.290  
1.282  
1.267  
1.253  
1.246  
1.235  
1.116  
1.108  
1.098  
1.090  
1.080  
1.073  
1.018  
0.993  
0.716  
0.698  
0.680

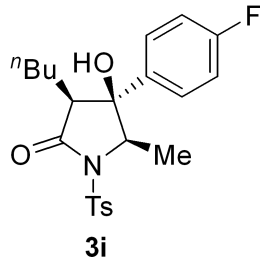

Current Data Parameters  
NAME qh-11134-2  
EXPNO 3  
PROCNO 1

F2 - Acquisition Parameters  
Date\_ 20150114  
Time 18.10  
INSTRUM spect  
PROBHD 5 mm DUL 13C-1  
PULPROG zg30  
TD 65536  
SOLVENT CDC13  
NS 5  
DS 0  
SWH 8012.820 Hz  
FIDRES 0.122266 Hz  
AQ 4.0894465 sec  
RG 25.32  
DW 62.400 usec  
DE 6.50 usec  
TE 295.7 K  
D1 1.00000000 sec  
TD0 1

==== CHANNEL f1 =====  
SFO1 400.1324710 MHz  
NUC1 1H  
P1 14.30 usec  
PLW1 9.10000038 W

F2 - Processing parameters  
SI 65536  
SF 400.1300095 MHz  
WDW EM  
SSB 0  
LB 0.30 Hz  
GB 0  
PC 1.00

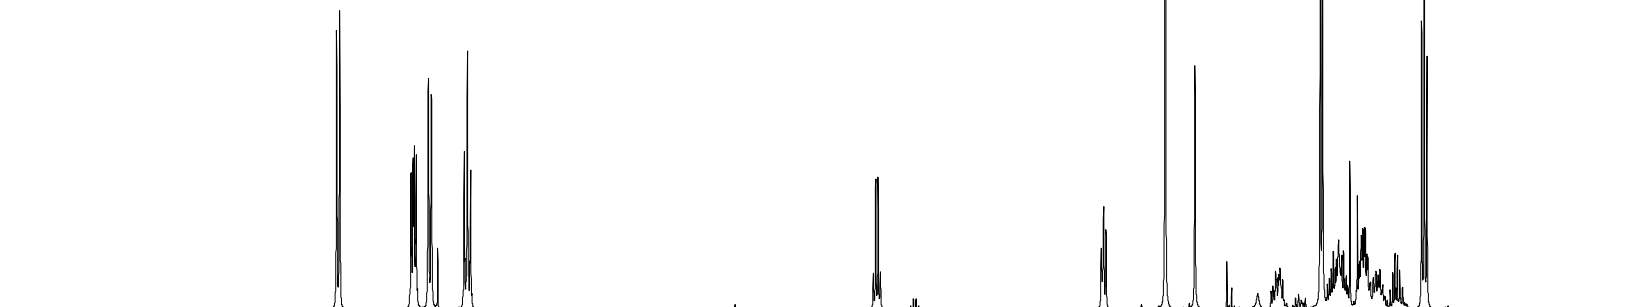

10 9 8 7 6 5 4 3 2 1 0 ppm

2.00

2.08

2.07

2.03

1.00

1.00

3.06

0.98

0.99

3.06

2.43

2.32

1.10

3.04

S-100

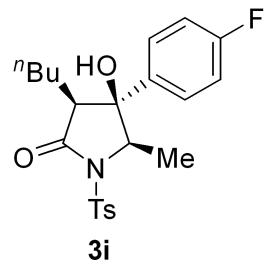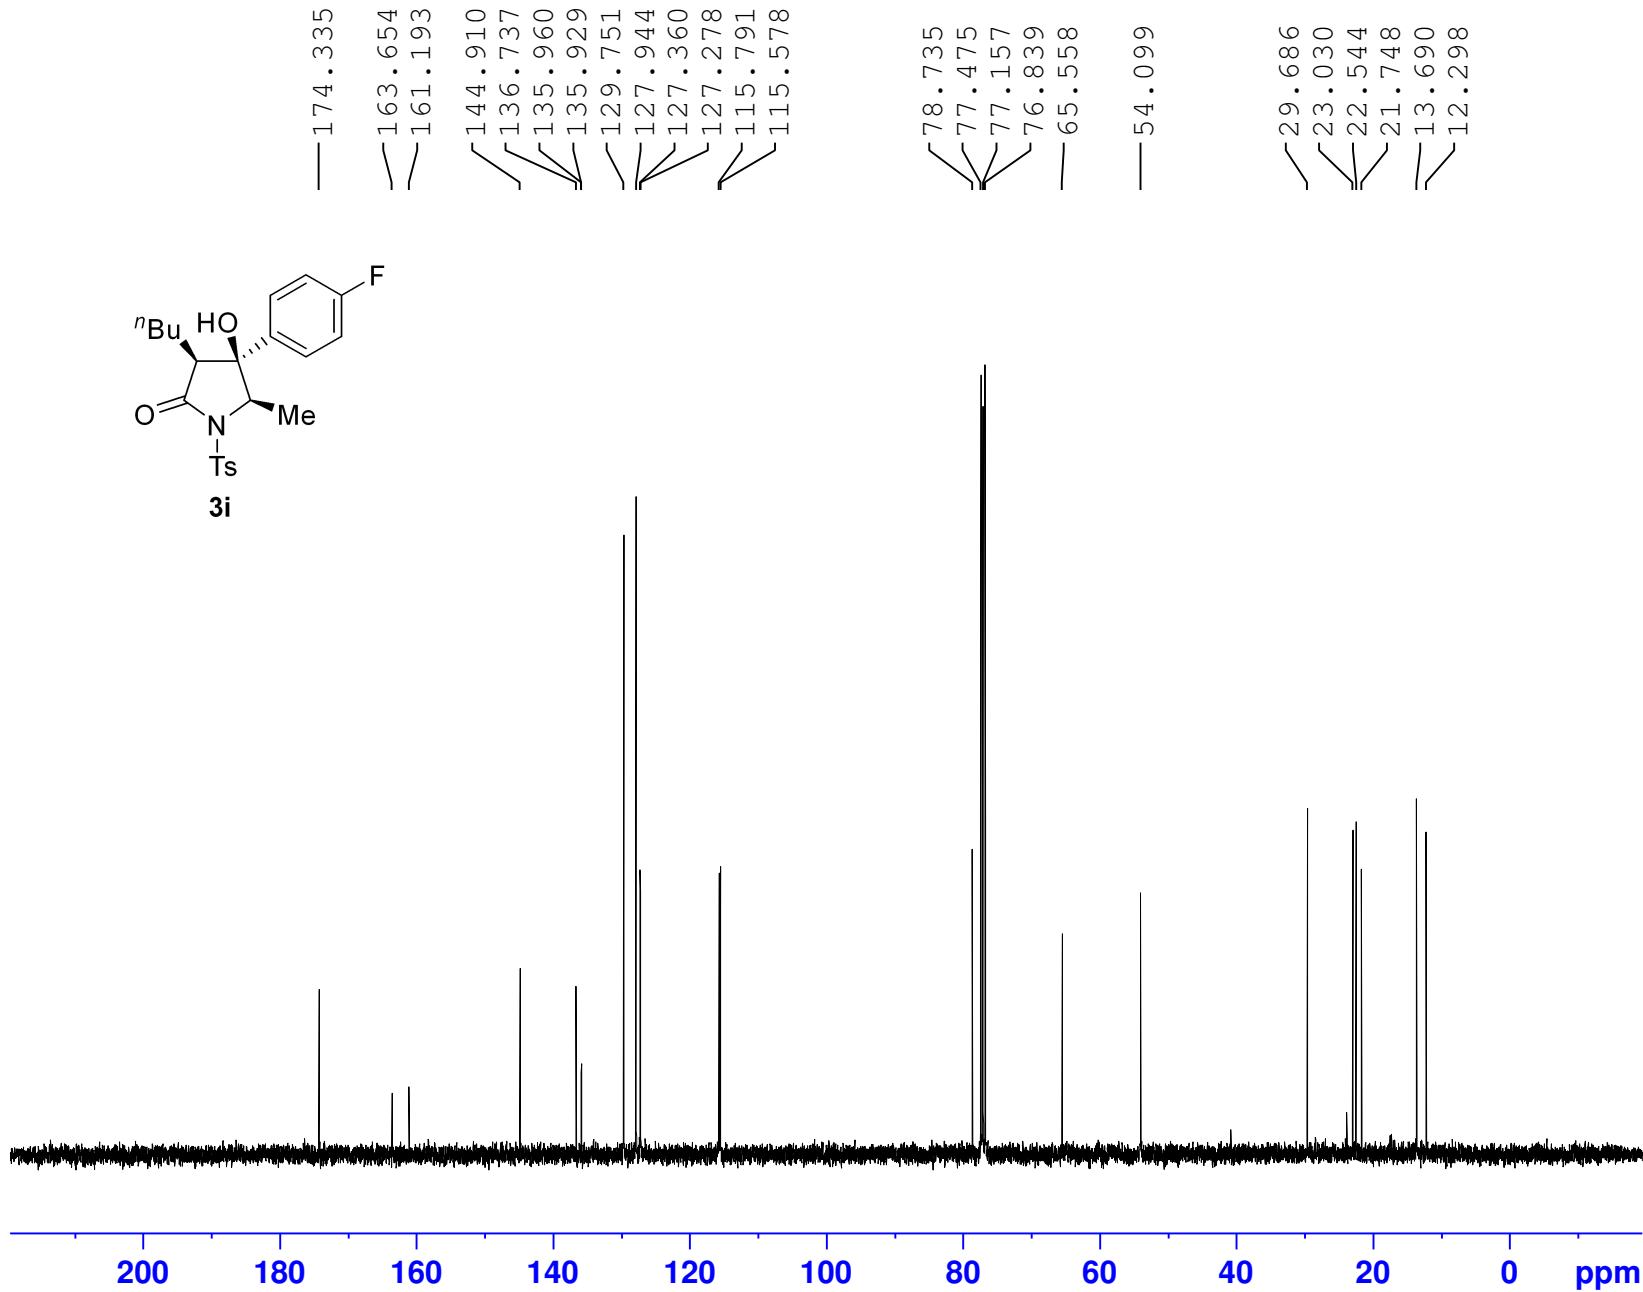

Current Data Parameters  
NAME qh-11134-2  
EXPNO 4  
PROCNO 1

F2 - Acquisition Parameters  
Date\_ 20150114  
Time 18.14  
INSTRUM spect  
PROBHD 5 mm DUL 13C-1  
PULPROG zgpg30  
TD 65536  
SOLVENT CDC13  
NS 74  
DS 2  
SWH 24038.461 Hz  
FIDRES 0.366798 Hz  
AQ 1.3631488 sec  
RG 196.92  
DW 20.800 usec  
DE 6.50 usec  
TE 296.4 K  
D1 2.00000000 sec  
D11 0.03000000 sec  
TD0 1

==== CHANNEL f1 =====  
SFO1 100.6228298 MHz  
NUC1 13C  
P1 9.60 usec  
PLW1 31.98900032 W

==== CHANNEL f2 =====  
SFO2 400.1316005 MHz  
NUC2 1H  
CPDPRG[2] waltz16  
PCPD2 90.00 usec  
PLW2 9.10000038 W  
PLW12 0.24608000 W  
PLW13 0.19933000 W

F2 - Processing parameters  
SI 32768  
SF 100.6127619 MHz  
WDW EM  
SSB 0  
LB 1.00 Hz  
GB 0  
PC 1.40

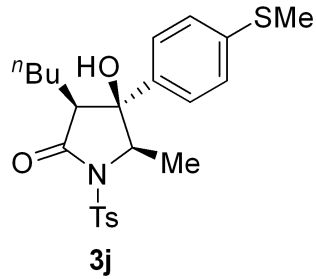

7.951  
 7.931  
 7.350  
 7.338  
 7.330  
 7.319  
 7.259  
 7.238

4.358  
 4.342  
 4.326  
 4.311  
 2.857  
 2.842  
 2.826  
 2.493  
 2.438  
 1.985  
 1.689  
 1.662  
 1.644  
 1.394  
 1.378  
 1.309  
 1.298  
 1.291  
 1.279  
 1.157  
 1.141  
 1.123  
 1.106  
 1.086  
 1.048  
 1.030  
 0.743

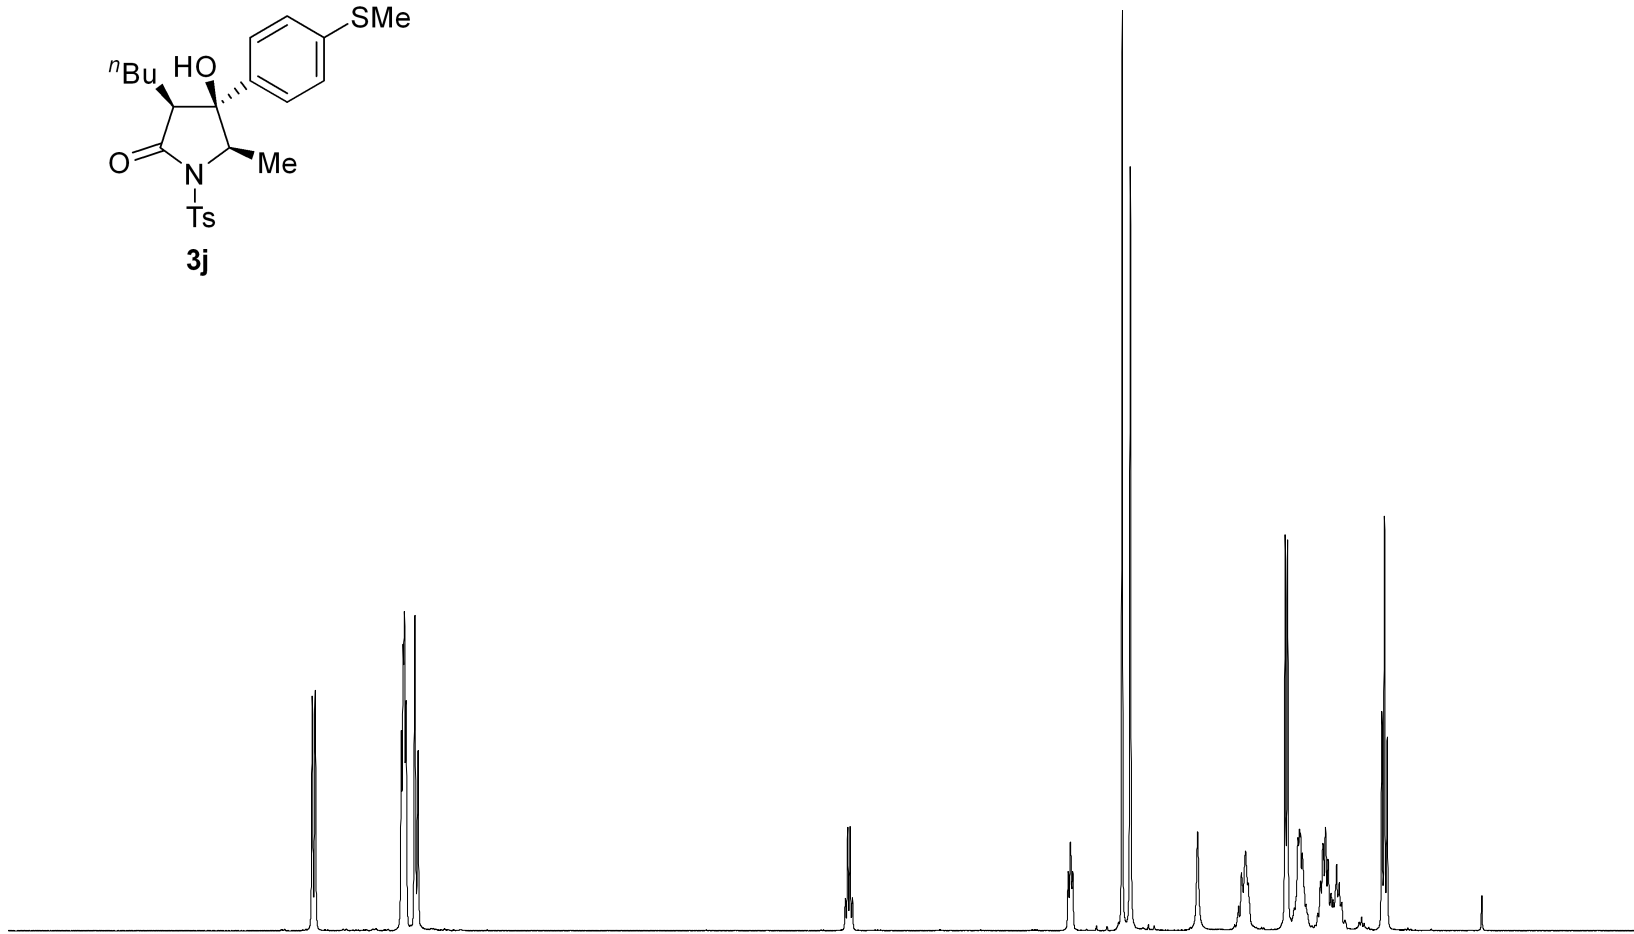

Current Data Parameters  
 NAME qh-11154-2  
 EXPNO 3  
 PROCNO 1

F2 - Acquisition Parameters  
 Date\_ 20150401  
 Time 18.37  
 INSTRUM spect  
 PROBHD 5 mm PABBO BB/  
 PULPROG zg30  
 TD 65536  
 SOLVENT CDC13  
 NS 2  
 DS 0  
 SWH 8012.820 Hz  
 FIDRES 0.122266 Hz  
 AQ 4.0894465 sec  
 RG 54.81  
 DW 62.400 usec  
 DE 6.50 usec  
 TE 296.5 K  
 D1 1.00000000 sec  
 TD0 1

===== CHANNEL f1 =====  
 SFO1 400.1324710 MHz  
 NUC1 1H  
 P1 14.50 usec  
 PLW1 11.99499989 W

F2 - Processing parameters  
 SI 65536  
 SF 400.1300081 MHz  
 WDW EM  
 SSB 0  
 LB 0.30 Hz  
 GB 0  
 PC 1.00

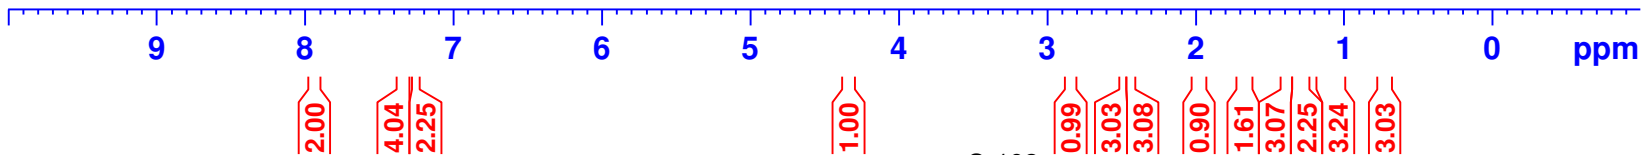

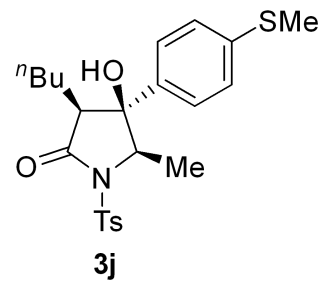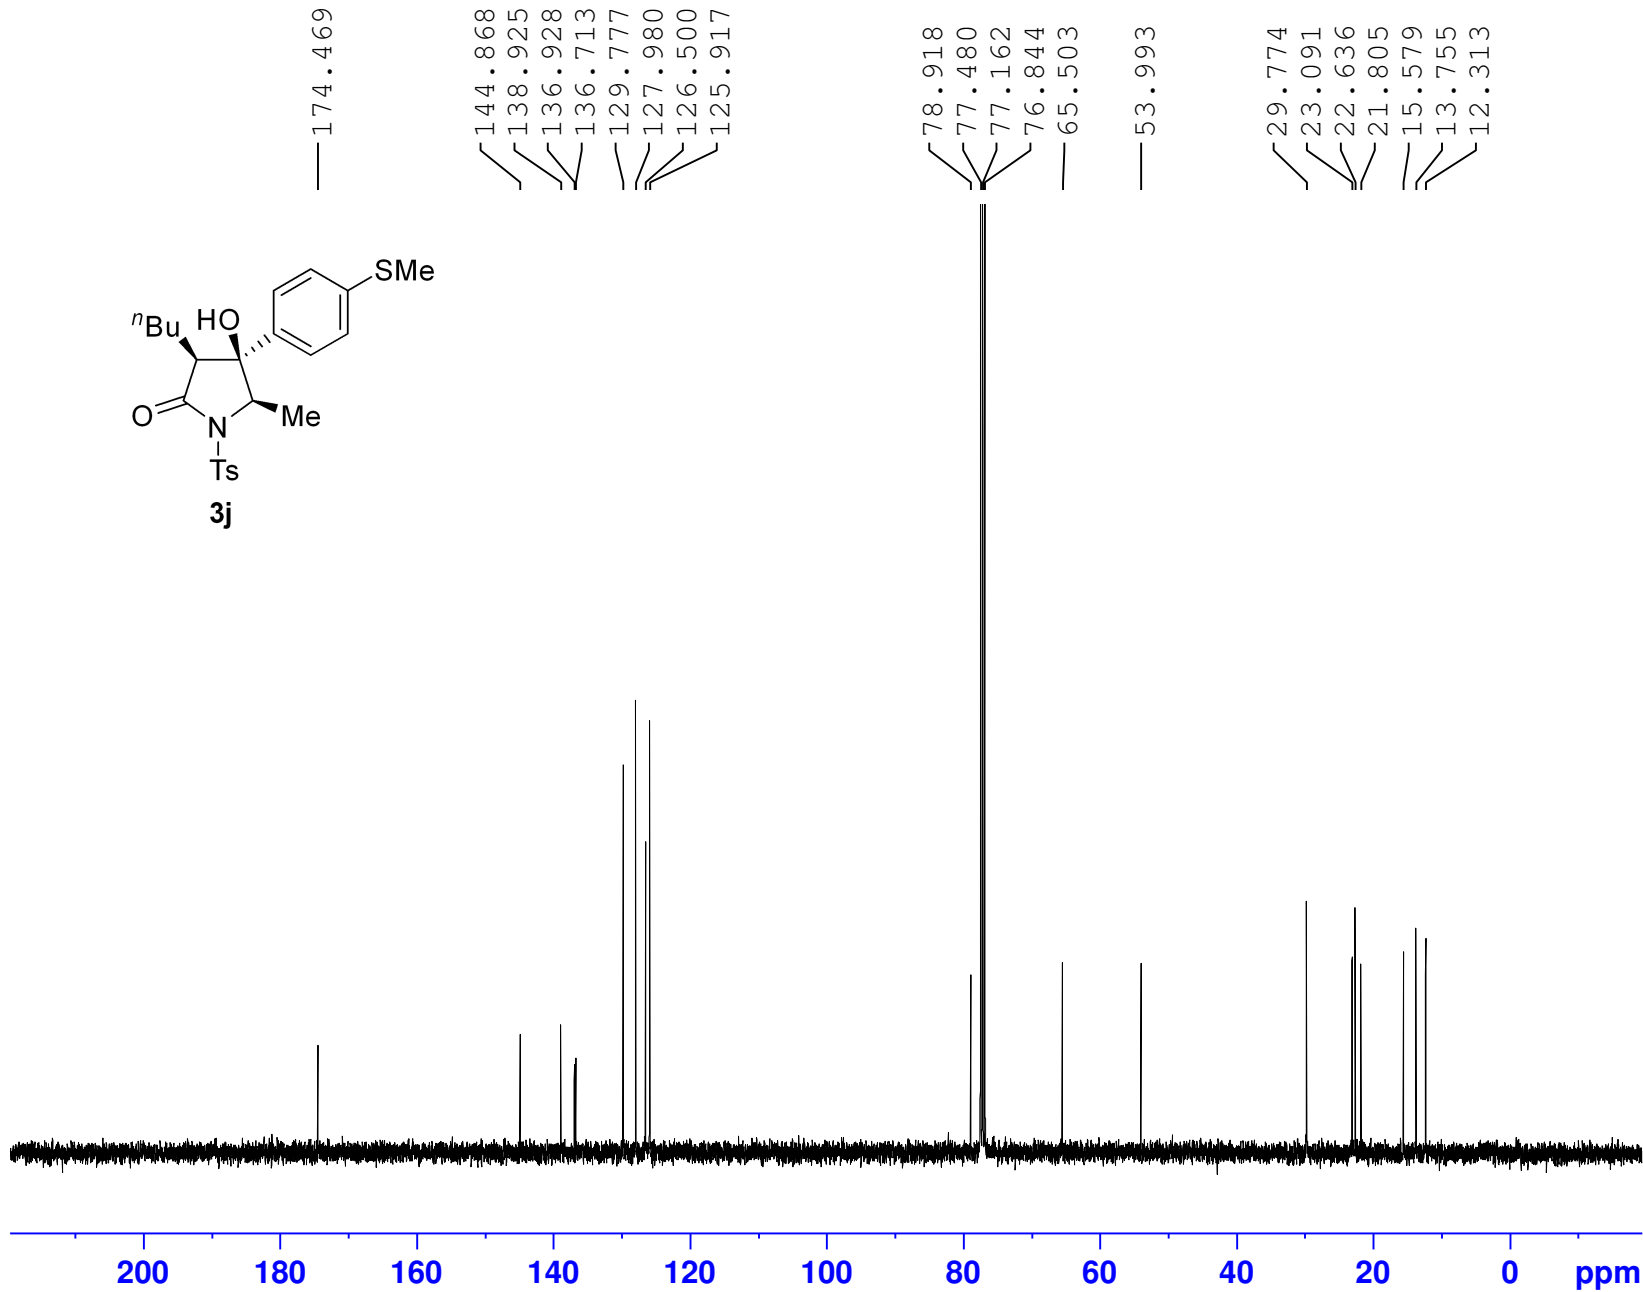

Current Data Parameters  
NAME qh-11154-2  
EXPNO 4  
PROCNO 1

F2 - Acquisition Parameters  
Date\_ 20150401  
Time 18.42  
INSTRUM spect  
PROBHD 5 mm PABBO BB/  
PULPROG zgpg30  
TD 65536  
SOLVENT CDC13  
NS 86  
DS 2  
SWH 24038.461 Hz  
FIDRES 0.366798 Hz  
AQ 1.3631488 sec  
RG 196.92  
DW 20.800 usec  
DE 6.50 usec  
TE 297.4 K  
D1 2.00000000 sec  
D11 0.03000000 sec  
TD0 1

==== CHANNEL f1 =====  
SFO1 100.6228298 MHz  
NUC1 13C  
P1 9.70 usec  
PLW1 46.98899841 W

==== CHANNEL f2 =====  
SFO2 400.1316005 MHz  
NUC2 1H  
CPDPRG[2] waltz16  
PCPD2 90.00 usec  
PLW2 11.99499989 W  
PLW12 0.34213999 W  
PLW13 0.27713001 W

F2 - Processing parameters  
SI 32768  
SF 100.6127575 MHz  
WDW EM  
SSB 0  
LB 1.00 Hz  
GB 0  
PC 1.40

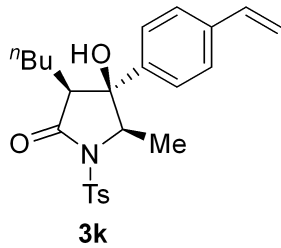

7.957  
7.937  
7.440  
7.419  
7.394  
7.373  
7.339  
7.319  
7.260  
6.752  
6.725  
6.708  
6.681  
5.807  
5.763  
5.312  
5.285  
4.393  
4.378  
4.362  
4.346  
2.891  
2.876  
2.860  
2.439  
1.978  
1.839  
1.720  
1.697  
1.675  
1.654  
1.402  
1.387  
1.320  
1.307  
1.289  
1.278  
1.270  
1.263  
1.254  
1.153  
1.137  
1.119  
1.102

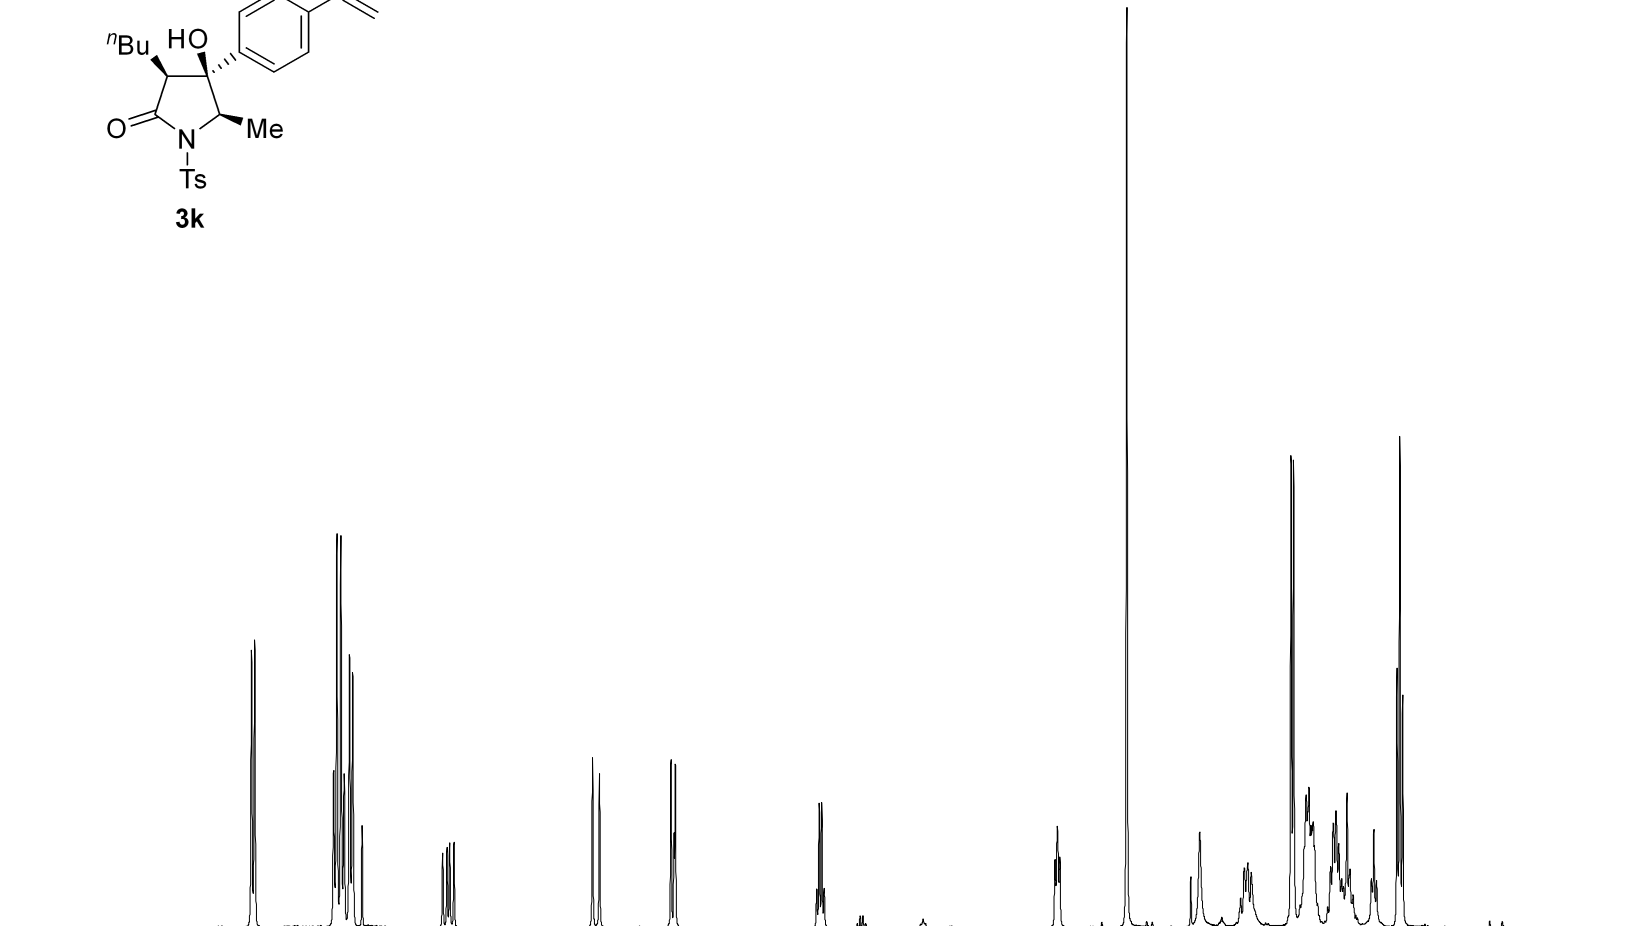

Current Data Parameters  
NAME qh-11156-1  
EXPNO 1  
PROCNO 1

F2 - Acquisition Parameters  
Date\_ 20150124  
Time 15.12  
INSTRUM spect  
PROBHD 5 mm DUL 13C-1  
PULPROG zg30  
TD 65536  
SOLVENT CDC13  
NS 2  
DS 0  
SWH 8012.820 Hz  
FIDRES 0.122266 Hz  
AQ 4.0894465 sec  
RG 70.97  
DW 62.400 usec  
DE 6.50 usec  
TE 296.2 K  
D1 1.00000000 sec  
TD0 1

==== CHANNEL f1 =====  
SFO1 400.1324710 MHz  
NUC1 1H  
P1 14.30 usec  
PLW1 9.10000038 W

F2 - Processing parameters  
SI 65536  
SF 400.1300094 MHz  
WDW EM  
SSB 0  
LB 0.30 Hz  
GB 0  
PC 1.00

9 8 7 6 5 4 3 2 1 0 ppm

2.00  
4.02  
2.03  
0.98  
0.99  
1.06  
1.00  
1.00  
3.01  
0.92  
1.43  
3.07  
3.34  
2.31  
3.04



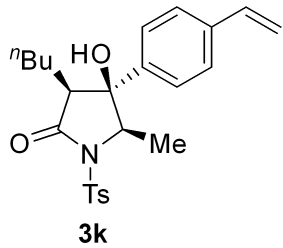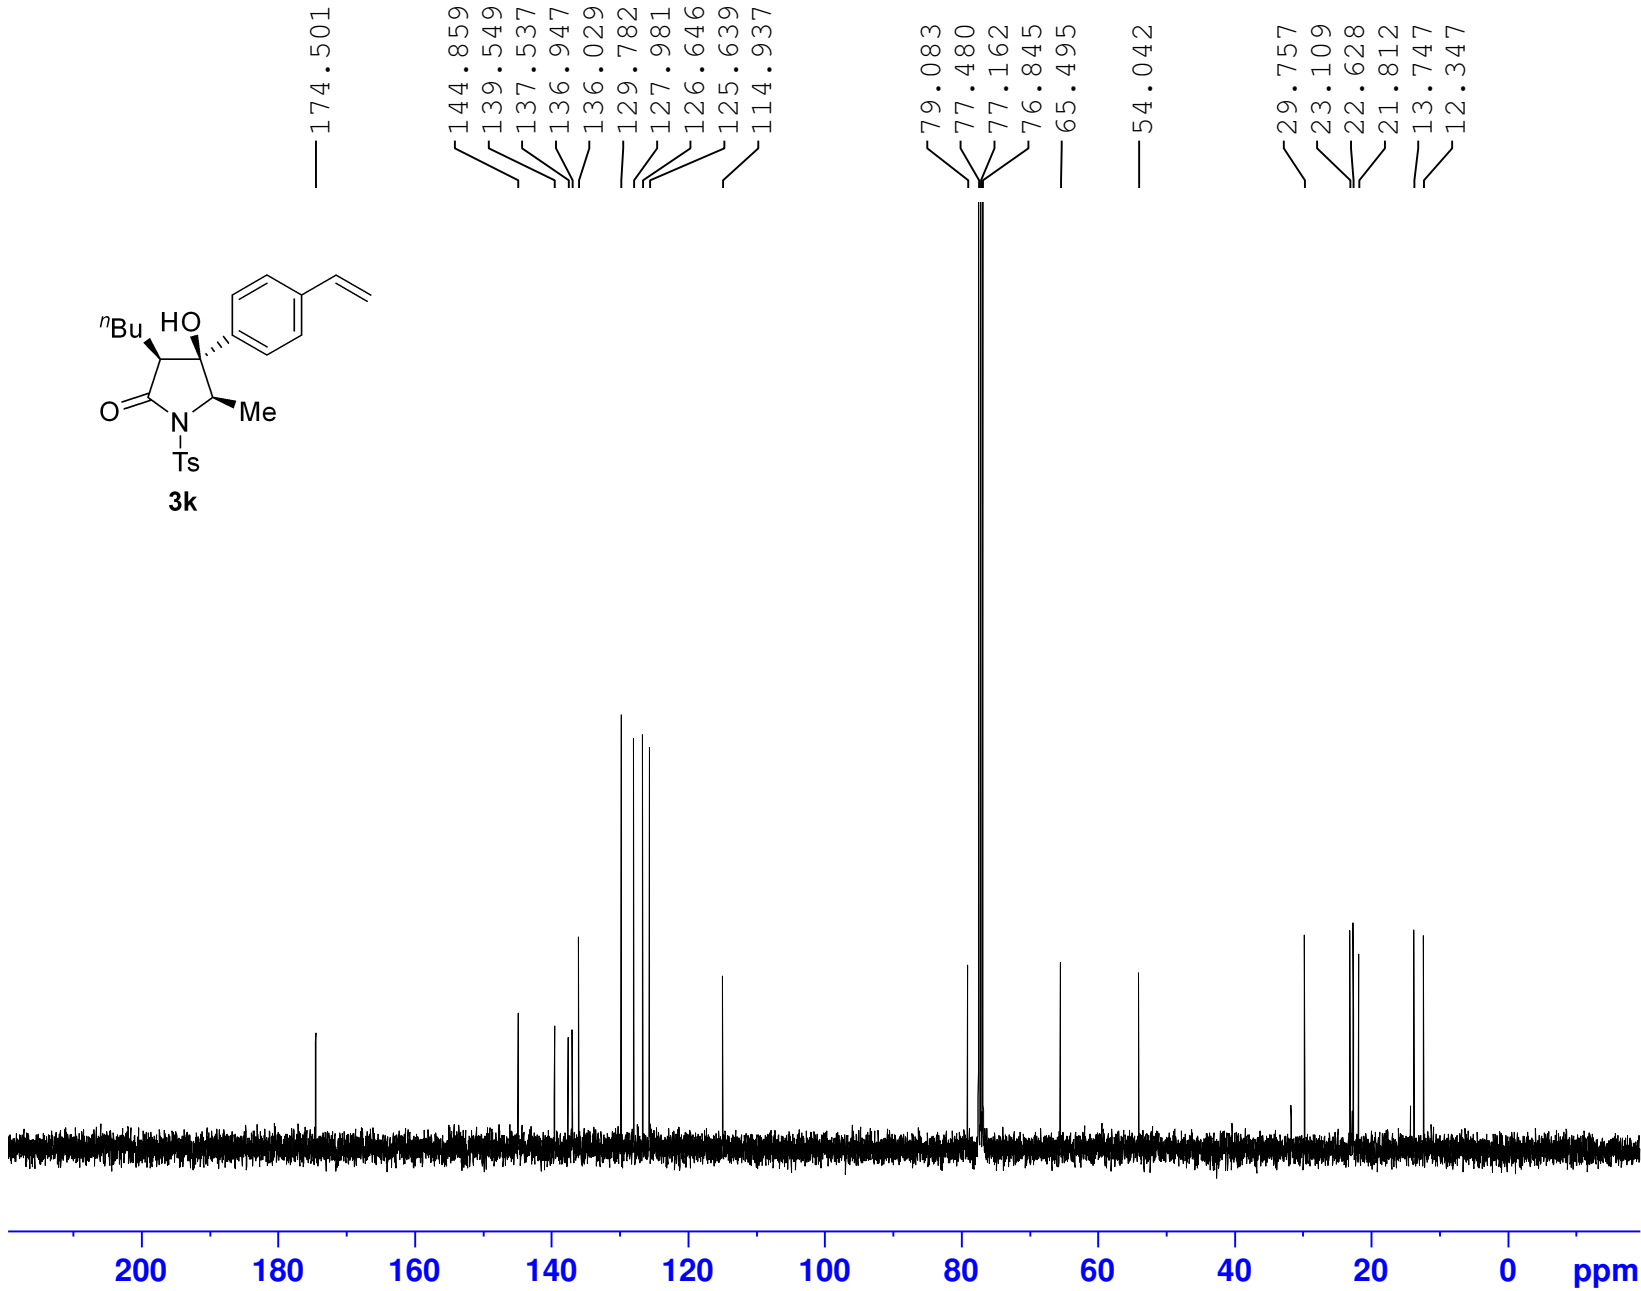

Current Data Parameters  
NAME qh-11156-1  
EXPNO 2  
PROCNO 1

F2 - Acquisition Parameters  
Date\_ 20150124  
Time 15.06  
INSTRUM spect  
PROBHD 5 mm DUL 13C-1  
PULPROG zgpg30  
TD 65536  
SOLVENT CDC13  
NS 100  
DS 2  
SWH 24038.461 Hz  
FIDRES 0.366798 Hz  
AQ 1.3631488 sec  
RG 196.92  
DW 20.800 usec  
DE 6.50 usec  
TE 295.9 K  
D1 2.00000000 sec  
D11 0.03000000 sec  
TD0 1

==== CHANNEL f1 =====  
SFO1 100.6228298 MHz  
NUC1 13C  
P1 9.60 usec  
PLW1 31.98900032 W

==== CHANNEL f2 =====  
SFO2 400.1316005 MHz  
NUC2 1H  
CPDPRG[2] waltz16  
PCPD2 90.00 usec  
PLW2 9.10000038 W  
PLW12 0.24608000 W  
PLW13 0.19933000 W

F2 - Processing parameters  
SI 32768  
SF 100.6127575 MHz  
WDW EM  
SSB 0  
LB 1.00 Hz  
GB 0  
PC 1.40



7.995  
7.958  
7.938  
7.861  
7.362  
7.342  
7.260

4.442  
4.426  
4.411  
4.395  
2.970  
2.954  
2.937  
2.630  
2.450  
1.751  
1.739  
1.724  
1.423  
1.407  
1.357  
1.335  
1.320  
1.299  
1.255  
1.237  
1.170  
1.158  
1.147  
1.132  
1.116  
1.097  
1.076  
1.058  
1.044  
0.991

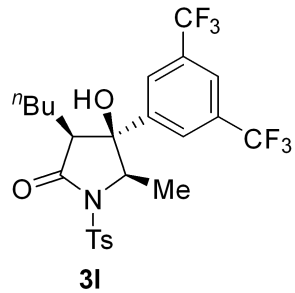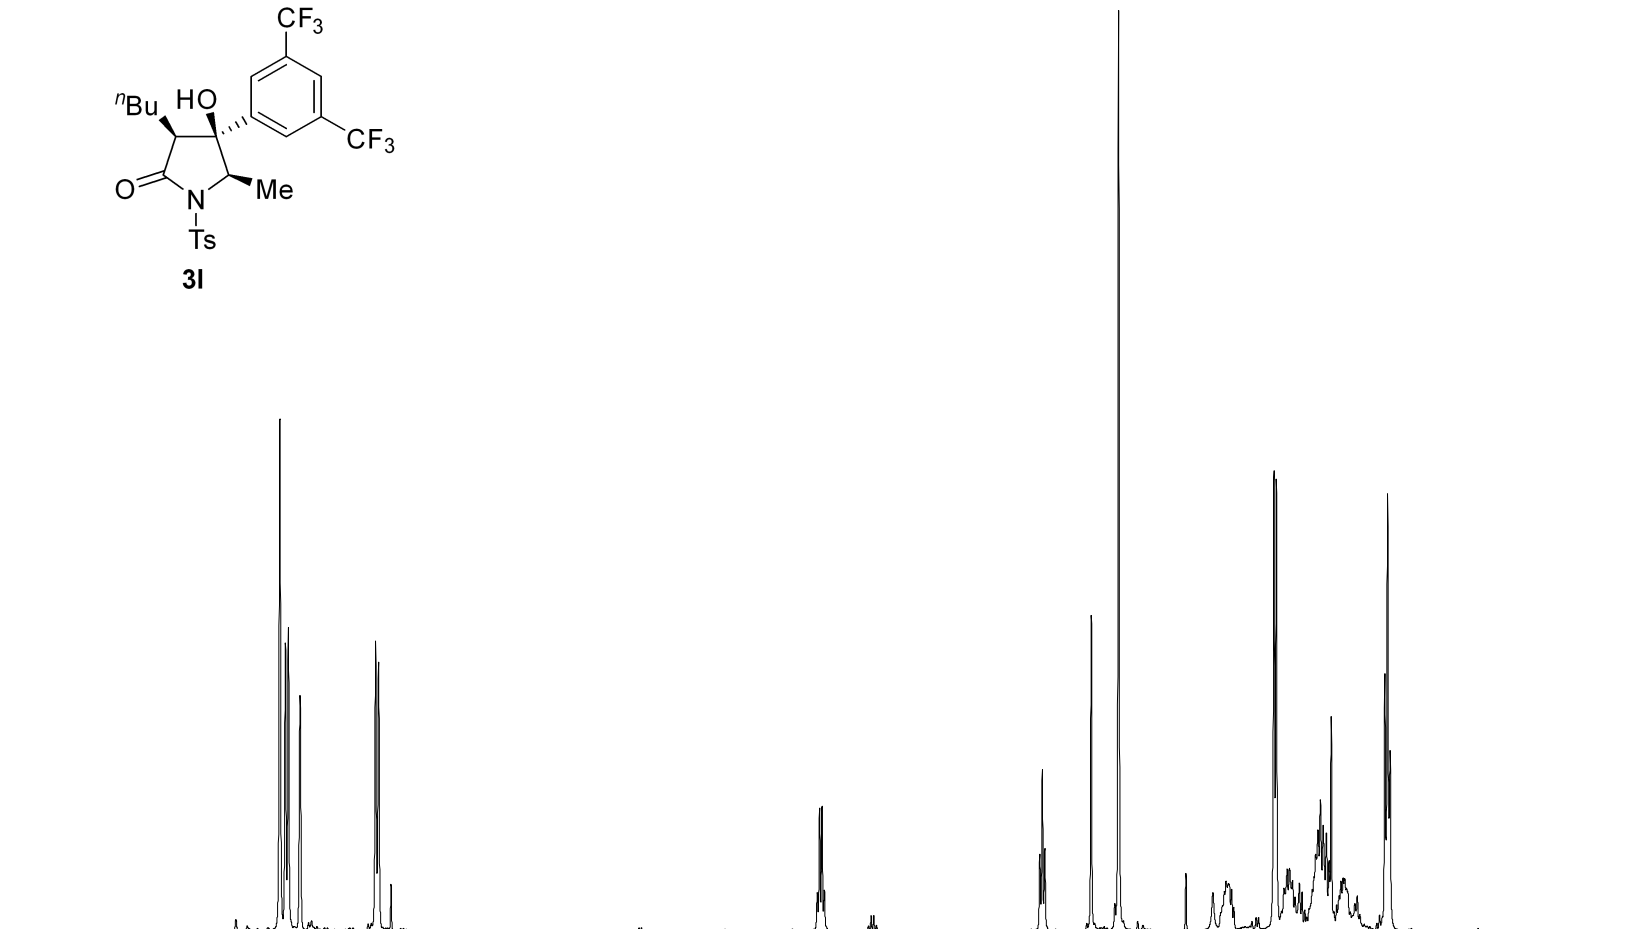

Current Data Parameters  
NAME qh-11156-3  
EXPNO 1  
PROCNO 1

F2 - Acquisition Parameters  
Date\_ 20150124  
Time 15.15  
INSTRUM spect  
PROBHD 5 mm DUL 13C-1  
PULPROG zg30  
TD 65536  
SOLVENT CDC13  
NS 2  
DS 0  
SWH 8012.820 Hz  
FIDRES 0.122266 Hz  
AQ 4.0894465 sec  
RG 45.67  
DW 62.400 usec  
DE 6.50 usec  
TE 295.8 K  
D1 1.00000000 sec  
TD0 1

==== CHANNEL f1 =====  
SFO1 400.1324710 MHz  
NUC1 1H  
P1 14.30 usec  
PLW1 9.10000038 W

F2 - Processing parameters  
SI 65536  
SF 400.1300098 MHz  
WDW EM  
SSB 0  
LB 0.30 Hz  
GB 0  
PC 1.00

9

8

7

6

5

4

3

2

1

0

ppm

1.00

S-106

1.00

0.98

3.13

1.04

3.00

1.23

3.07

1.16

3.04

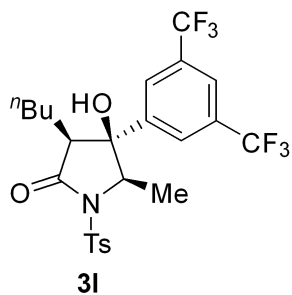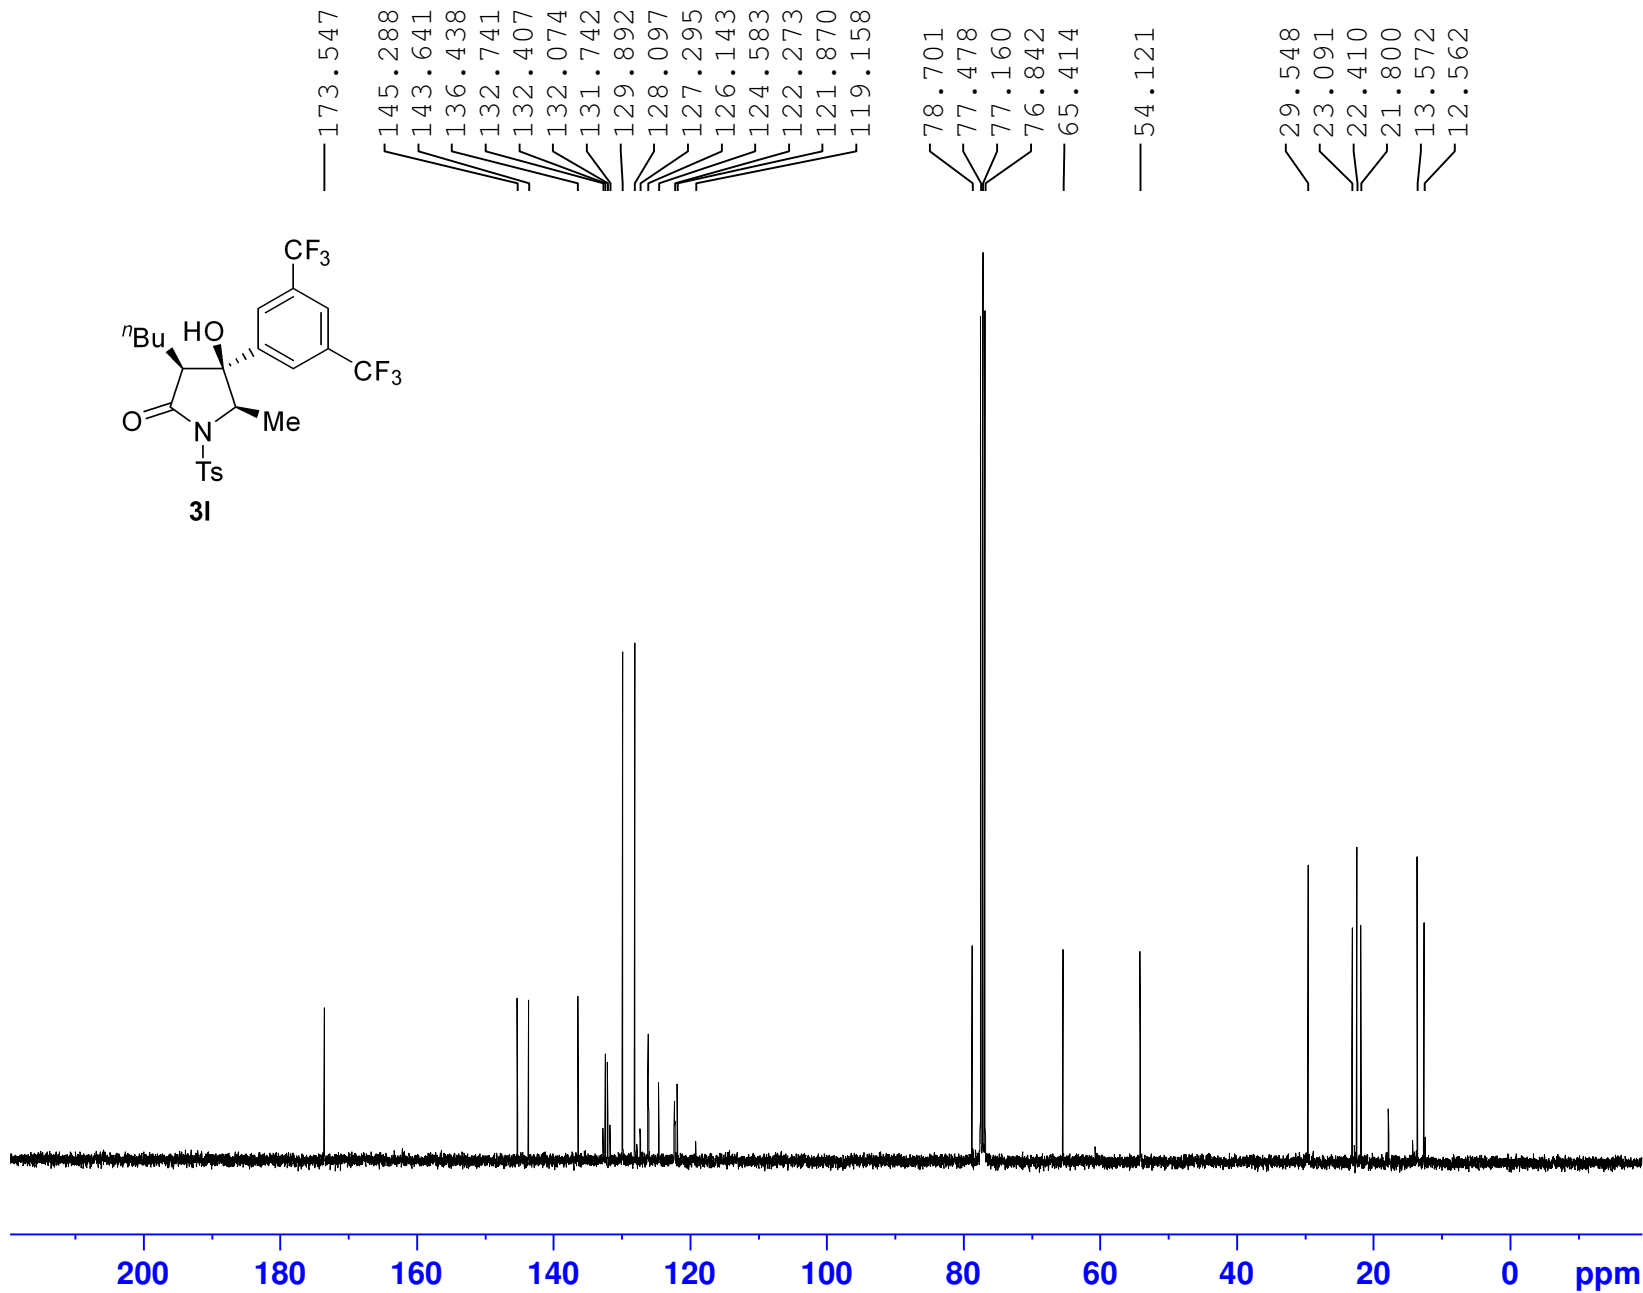

Current Data Parameters  
NAME qh-11156-3  
EXPNO 2  
PROCNO 1

F2 - Acquisition Parameters  
Date\_ 20150124  
Time 15.22  
INSTRUM spect  
PROBHD 5 mm DUL 13C-1  
PULPROG zgpg30  
TD 65536  
SOLVENT CDC13  
NS 213  
DS 2  
SWH 24038.461 Hz  
FIDRES 0.366798 Hz  
AQ 1.3631488 sec  
RG 196.92  
DW 20.800 usec  
DE 6.50 usec  
TE 296.5 K  
D1 2.00000000 sec  
D11 0.03000000 sec  
TD0 1

==== CHANNEL f1 =====  
SFO1 100.6228298 MHz  
NUC1 13C  
P1 9.60 usec  
PLW1 31.98900032 W

==== CHANNEL f2 =====  
SFO2 400.1316005 MHz  
NUC2 1H  
CPDPRG[2] waltz16  
PCPD2 90.00 usec  
PLW2 9.10000038 W  
PLW12 0.24608000 W  
PLW13 0.19933000 W

F2 - Processing parameters  
SI 32768  
SF 100.6127568 MHz  
WDW EM  
SSB 0  
LB 1.00 Hz  
GB 0  
PC 1.40

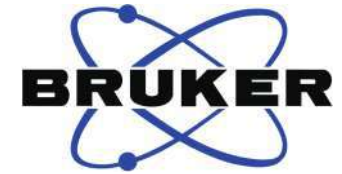

Current Data Parameters  
 NAME qh-11149  
 EXPNO 1  
 PROCNO 1

F2 - Acquisition Parameters  
 Date\_ 20150121  
 Time 19.57  
 INSTRUM spect  
 PROBHD 5 mm DUL 13C-1  
 PULPROG zg30  
 TD 65536  
 SOLVENT CDC13  
 NS 2  
 DS 0  
 SWH 8012.820 Hz  
 FIDRES 0.122266 Hz  
 AQ 4.0894465 sec  
 RG 39.46  
 DW 62.400 usec  
 DE 6.50 usec  
 TE 296.2 K  
 D1 1.0000000 sec  
 TD0 1

==== CHANNEL f1 =====  
 SFO1 400.1324710 MHz  
 NUC1 1H  
 P1 14.30 usec  
 PLW1 9.10000038 W

F2 - Processing parameters  
 SI 65536  
 SF 400.1300096 MHz  
 WDW EM  
 SSB 0  
 LB 0.30 Hz  
 GB 0  
 PC 1.00

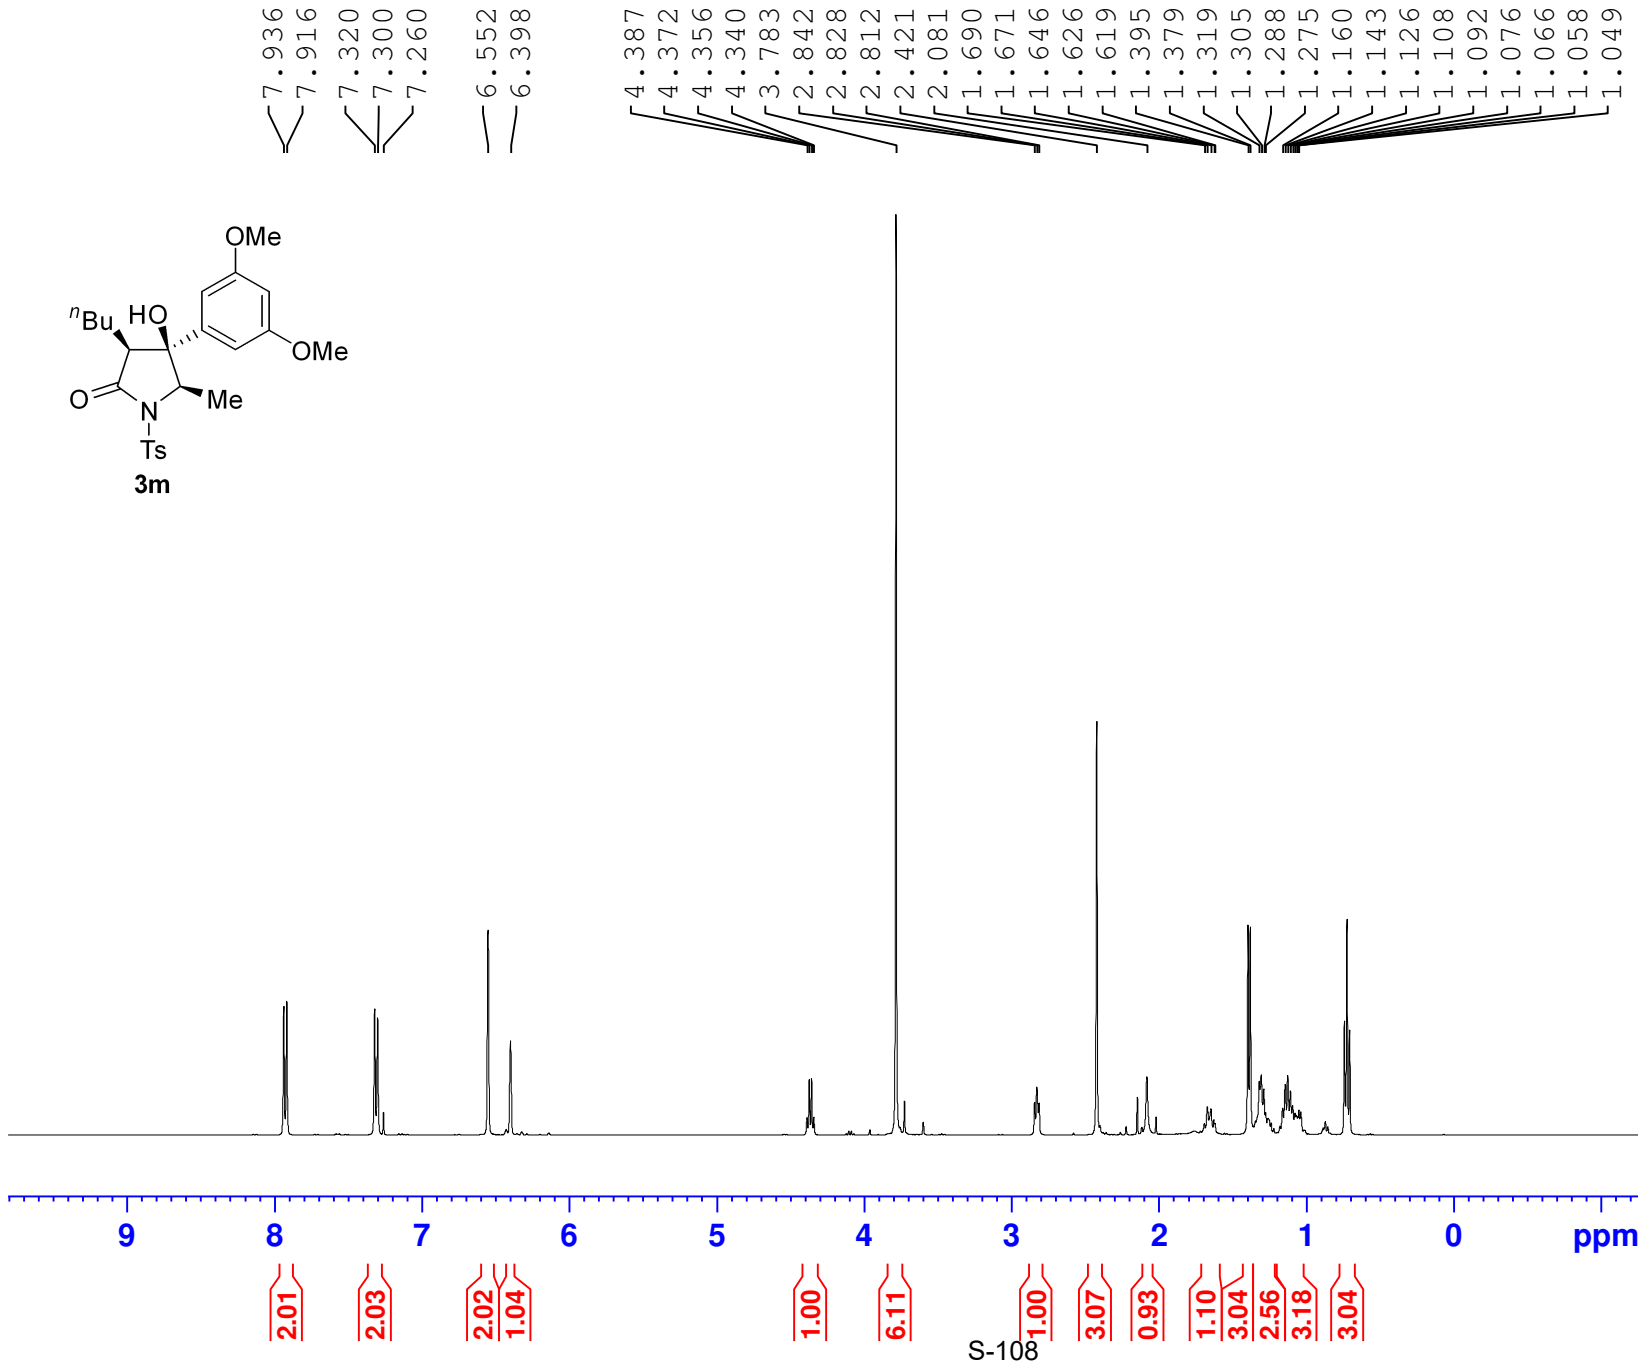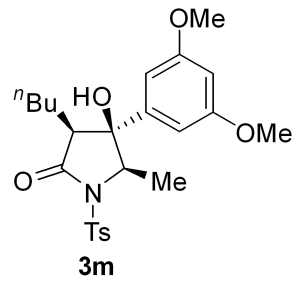

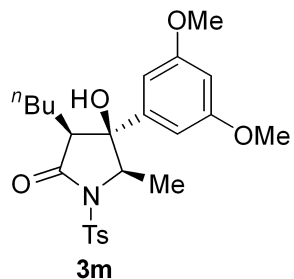

— 174.490  
 — 161.143  
 — 144.791  
 — 142.884  
 — 136.887  
 — 129.724  
 — 127.916  
 — 103.954  
 — 99.432  
 — 79.043  
 — 77.475  
 — 77.157  
 — 76.839  
 — 65.439  
 — 55.529  
 — 54.047  
 — 29.649  
 — 23.076  
 — 22.615  
 — 21.753  
 — 13.734  
 — 12.480

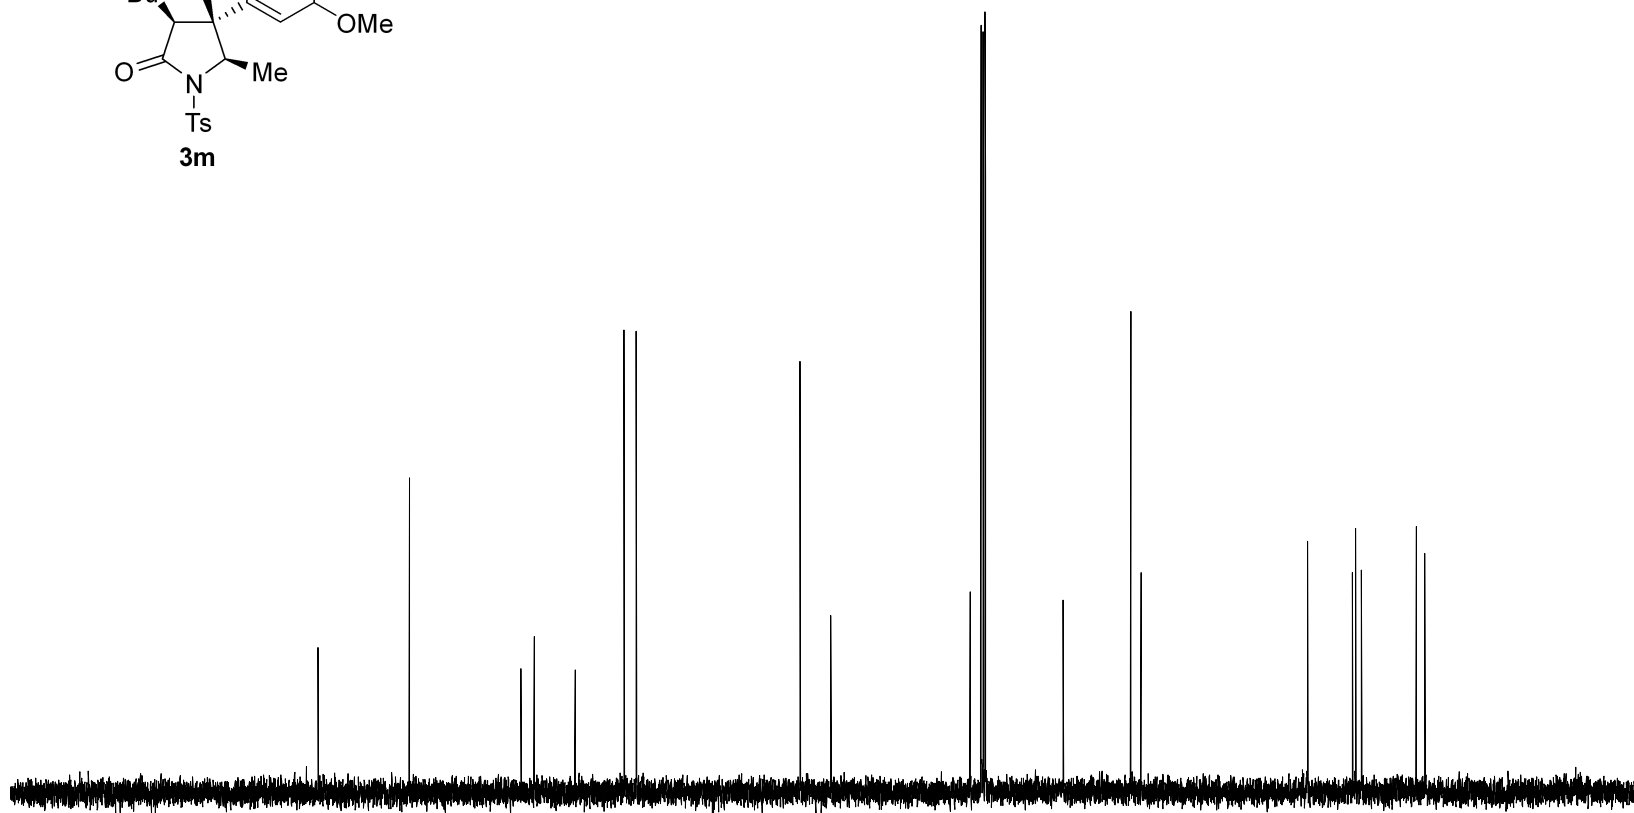

Current Data Parameters  
 NAME qh-11149  
 EXPNO 2  
 PROCNO 1

F2 - Acquisition Parameters  
 Date\_ 20150121  
 Time 20.00  
 INSTRUM spect  
 PROBHD 5 mm DUL 13C-1  
 PULPROG zgpg30  
 TD 65536  
 SOLVENT CDC13  
 NS 42  
 DS 2  
 SWH 24038.461 Hz  
 FIDRES 0.366798 Hz  
 AQ 1.3631488 sec  
 RG 196.92  
 DW 20.800 usec  
 DE 6.50 usec  
 TE 296.8 K  
 D1 2.00000000 sec  
 D11 0.03000000 sec  
 TD0 1

==== CHANNEL f1 =====  
 SFO1 100.6228298 MHz  
 NUC1 13C  
 P1 9.60 usec  
 PLW1 31.98900032 W

==== CHANNEL f2 =====  
 SFO2 400.1316005 MHz  
 NUC2 1H  
 CPDPRG[2] waltz16  
 PCPD2 90.00 usec  
 PLW2 9.10000038 W  
 PLW12 0.24608000 W  
 PLW13 0.19933000 W

F2 - Processing parameters  
 SI 32768  
 SF 100.6127612 MHz  
 WDW EM  
 SSB 0  
 LB 1.00 Hz  
 GB 0  
 PC 1.40

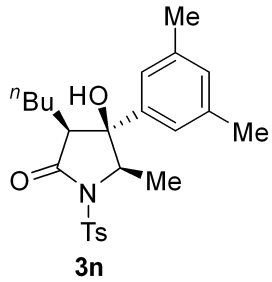

7.958  
7.938  
7.334  
7.314  
7.260  
7.009  
6.953

4.412  
4.397  
4.381  
4.365  
2.879  
2.864  
2.848  
2.435  
2.323  
1.948  
1.695  
1.675  
1.651  
1.631  
1.620  
1.395  
1.379  
1.345  
1.339  
1.327  
1.318  
1.309  
1.298  
1.286  
1.272  
1.168  
1.152

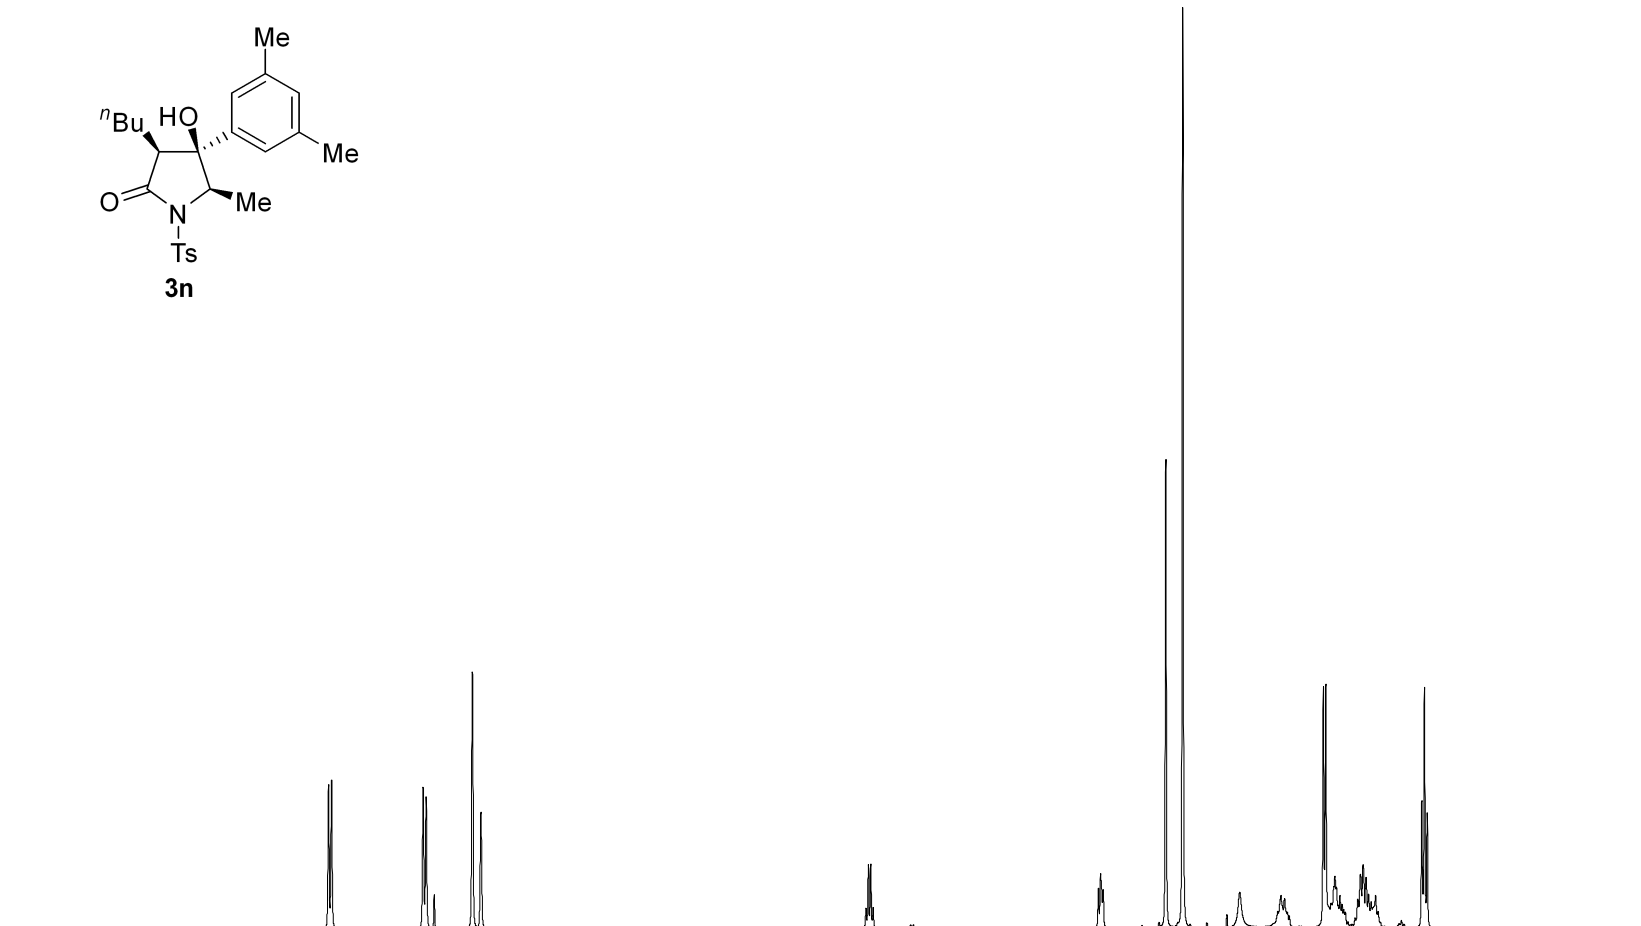

2.00  
2.01  
2.01  
1.00

1.00

1.00  
3.08  
6.09  
0.88  
1.19  
3.24  
2.14  
3.22  
3.01

Current Data Parameters  
NAME qh-11145-2  
EXPNO 1  
PROCNO 1

F2 - Acquisition Parameters  
Date\_ 20150120  
Time 21.24  
INSTRUM spect  
PROBHD 5 mm DUL 13C-1  
PULPROG zg30  
TD 65536  
SOLVENT CDC13  
NS 2  
DS 0  
SWH 8012.820 Hz  
FIDRES 0.122266 Hz  
AQ 4.0894465 sec  
RG 31.55  
DW 62.400 usec  
DE 6.50 usec  
TE 295.9 K  
D1 1.00000000 sec  
TD0 1

==== CHANNEL f1 =====  
SFO1 400.1324710 MHz  
NUC1 1H  
P1 14.30 usec  
PLW1 9.10000038 W

F2 - Processing parameters  
SI 65536  
SF 400.1300093 MHz  
WDW EM  
SSB 0  
LB 0.30 Hz  
GB 0  
PC 1.00

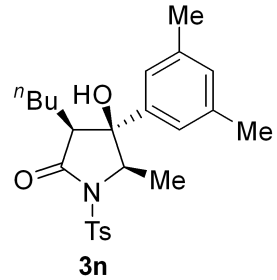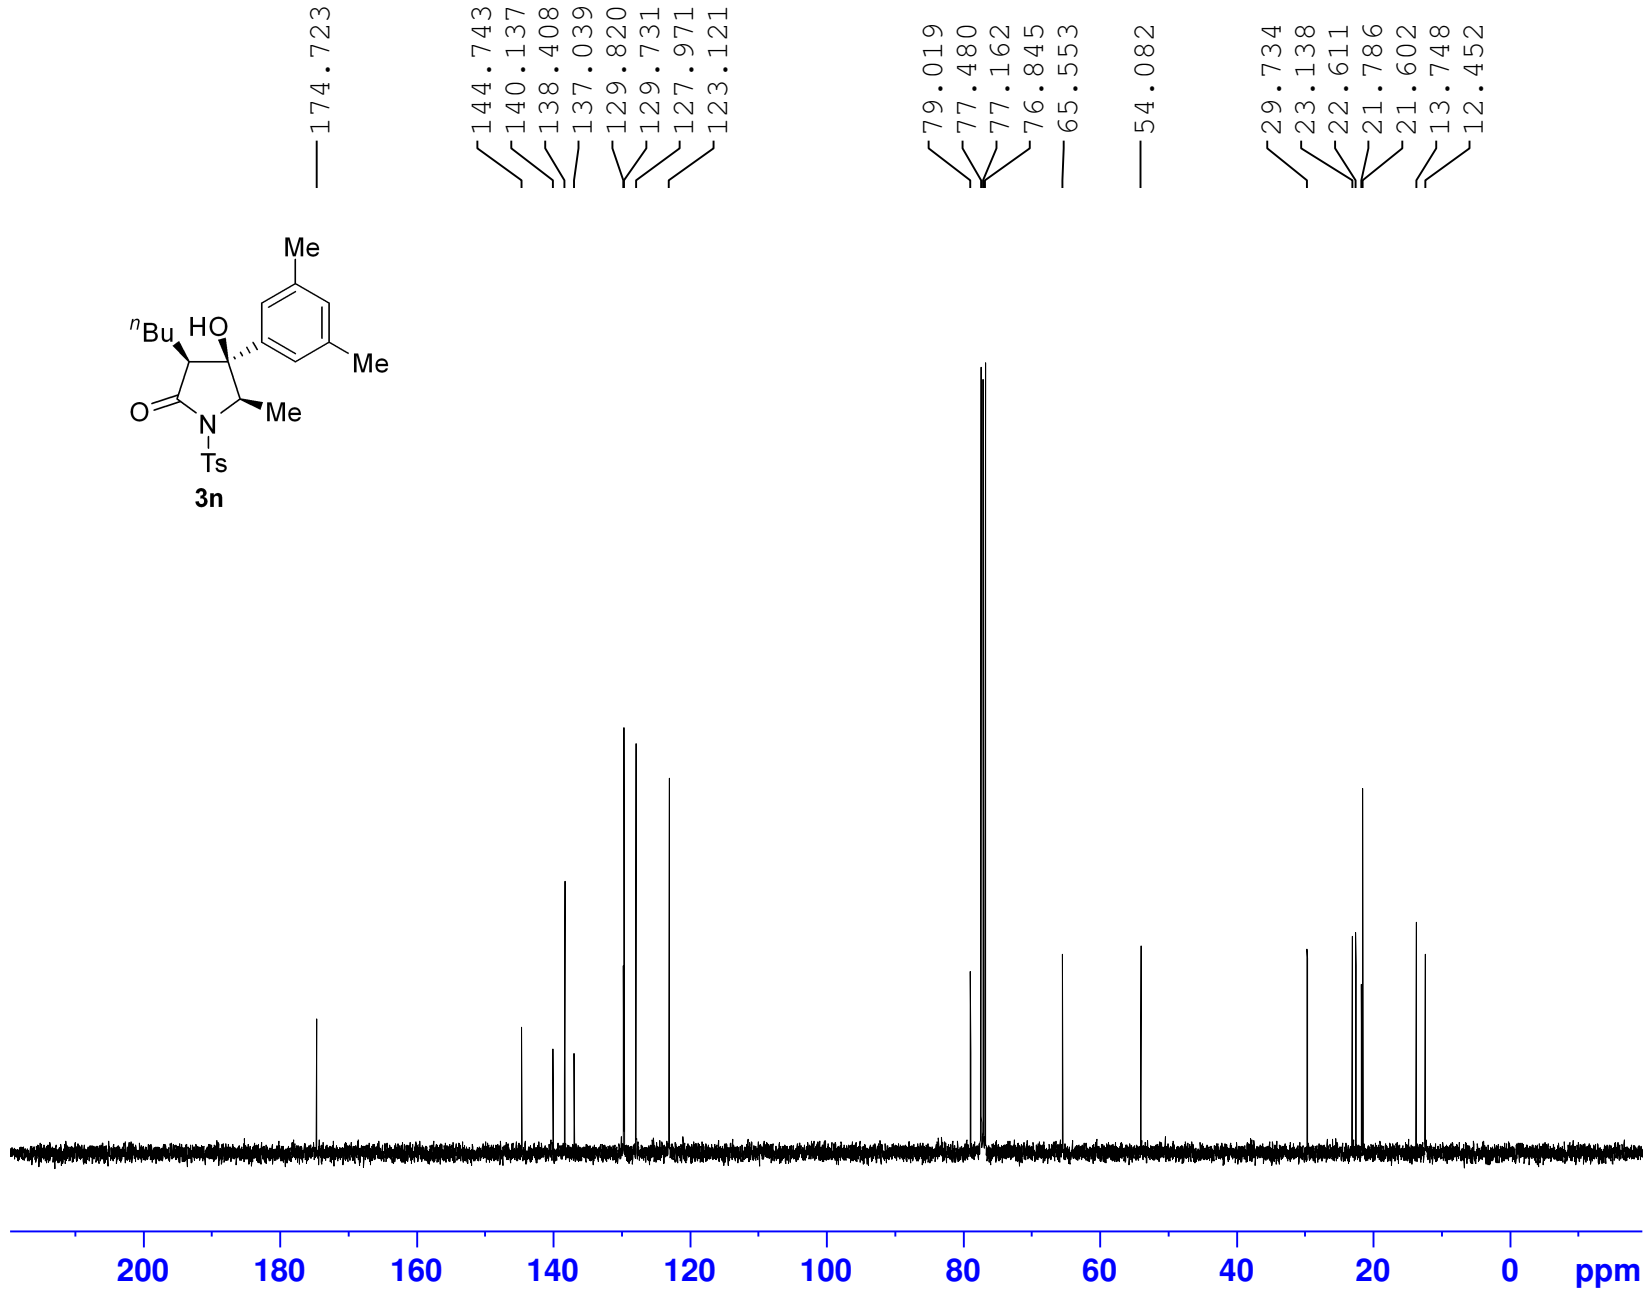

Current Data Parameters  
 NAME qh-11145-2  
 EXPNO 2  
 PROCNO 1

F2 - Acquisition Parameters  
 Date\_ 20150120  
 Time 21.32  
 INSTRUM spect  
 PROBHD 5 mm DUL 13C-1  
 PULPROG zgpg30  
 TD 65536  
 SOLVENT CDC13  
 NS 125  
 DS 2  
 SWH 24038.461 Hz  
 FIDRES 0.366798 Hz  
 AQ 1.3631488 sec  
 RG 196.92  
 DW 20.800 usec  
 DE 6.50 usec  
 TE 296.7 K  
 D1 2.00000000 sec  
 D11 0.03000000 sec  
 TD0 1

===== CHANNEL f1 =====  
 SFO1 100.6228298 MHz  
 NUC1 13C  
 P1 9.60 usec  
 PLW1 31.98900032 W

===== CHANNEL f2 =====  
 SFO2 400.1316005 MHz  
 NUC2 1H  
 CPDPRG[2] waltz16  
 PCPD2 90.00 usec  
 PLW2 9.10000038 W  
 PLW12 0.24608000 W  
 PLW13 0.19933000 W

F2 - Processing parameters  
 SI 32768  
 SF 100.6127590 MHz  
 WDW EM  
 SSB 0  
 LB 1.00 Hz  
 GB 0  
 PC 1.40

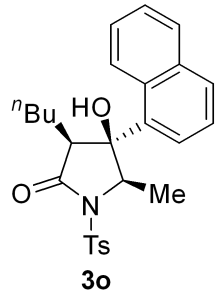

7.970  
7.952  
7.888  
7.867  
7.851  
7.837  
7.540  
7.532  
7.525  
7.517  
7.483  
7.461  
7.316  
7.296  
7.260

4.545  
4.530  
4.514  
4.498  
3.021  
3.007  
2.990  
2.424  
2.317  
1.764  
1.742  
1.719  
1.446  
1.430  
1.379  
1.366  
1.353  
1.344  
1.333  
1.324  
1.303  
1.289  
1.273  
1.122  
1.102  
1.087  
1.069  
1.061

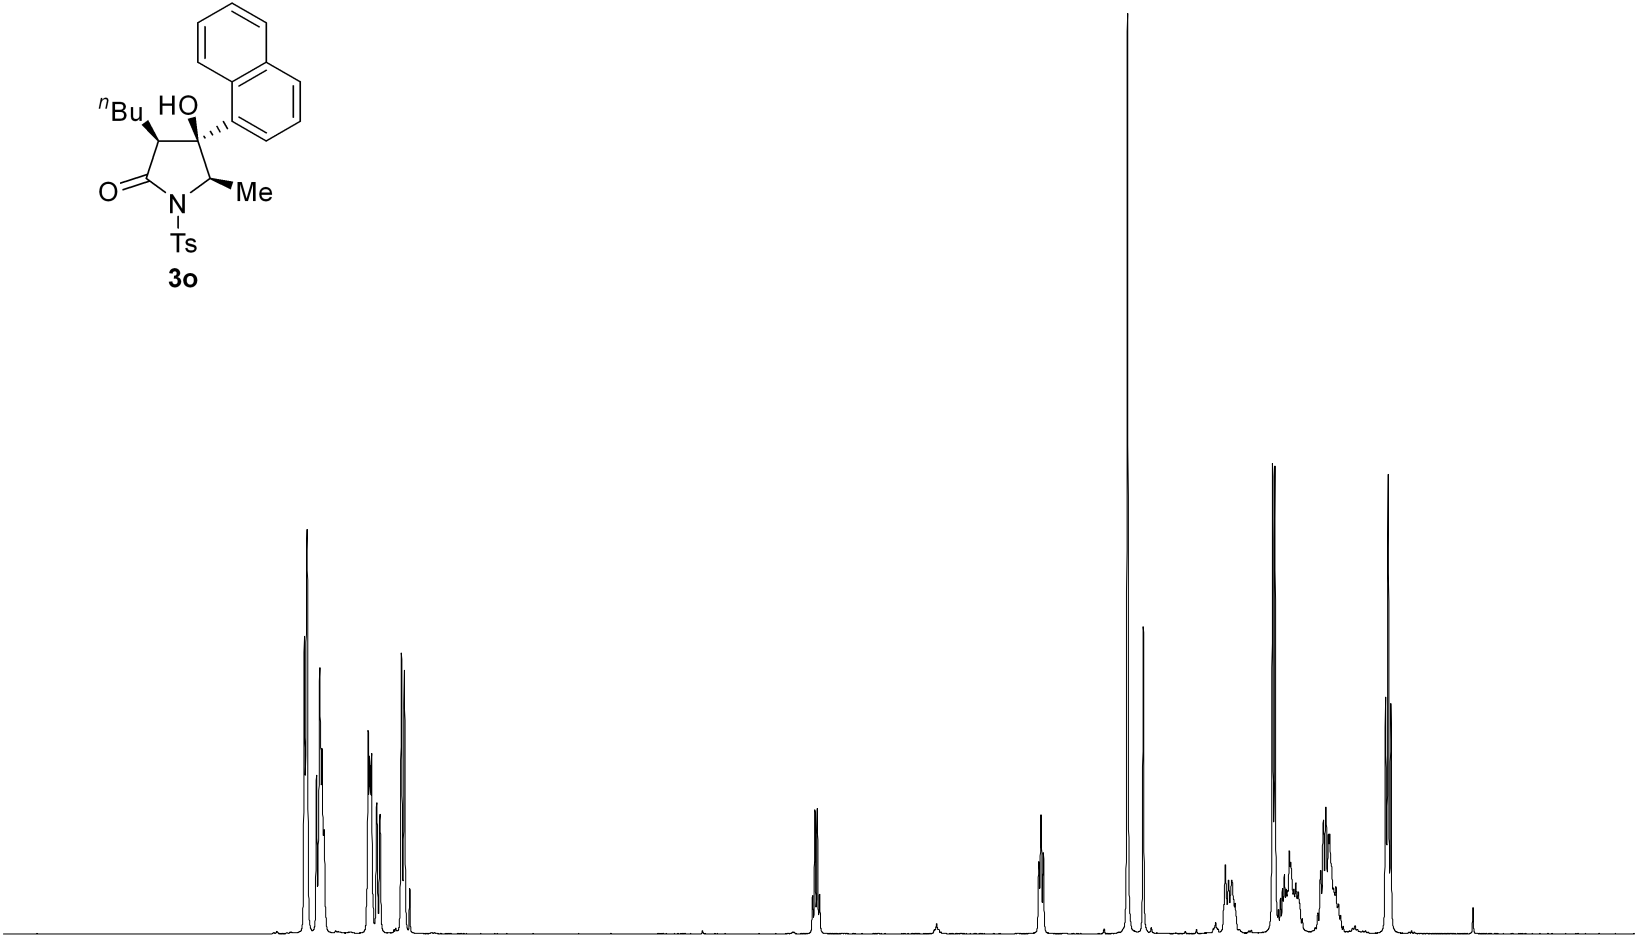

9 8 7 6 5 4 3 2 1 0 ppm

3.02  
3.06  
3.06  
2.03  
1.00  
1.00  
3.03  
0.96  
1.27  
3.04  
2.21  
3.20  
3.03

Current Data Parameters  
NAME qh-11159-2  
EXPNO 1  
PROCNO 1

F2 - Acquisition Parameters  
Date\_ 20150401  
Time 19.51  
INSTRUM spect  
PROBHD 5 mm PABBO BB/  
PULPROG zg30  
TD 65536  
SOLVENT CDC13  
NS 2  
DS 0  
SWH 8012.820 Hz  
FIDRES 0.122266 Hz  
AQ 4.0894465 sec  
RG 34.77  
DW 62.400 usec  
DE 6.50 usec  
TE 296.5 K  
D1 1.00000000 sec  
TD0 1

==== CHANNEL f1 =====  
SFO1 400.1324710 MHz  
NUC1 1H  
P1 14.50 usec  
PLW1 11.99499989 W

F2 - Processing parameters  
SI 65536  
SF 400.1300089 MHz  
WDW EM  
SSB 0  
LB 0.30 Hz  
GB 0  
PC 1.00



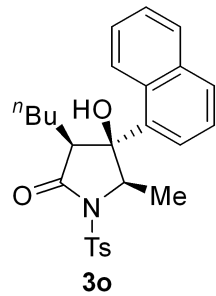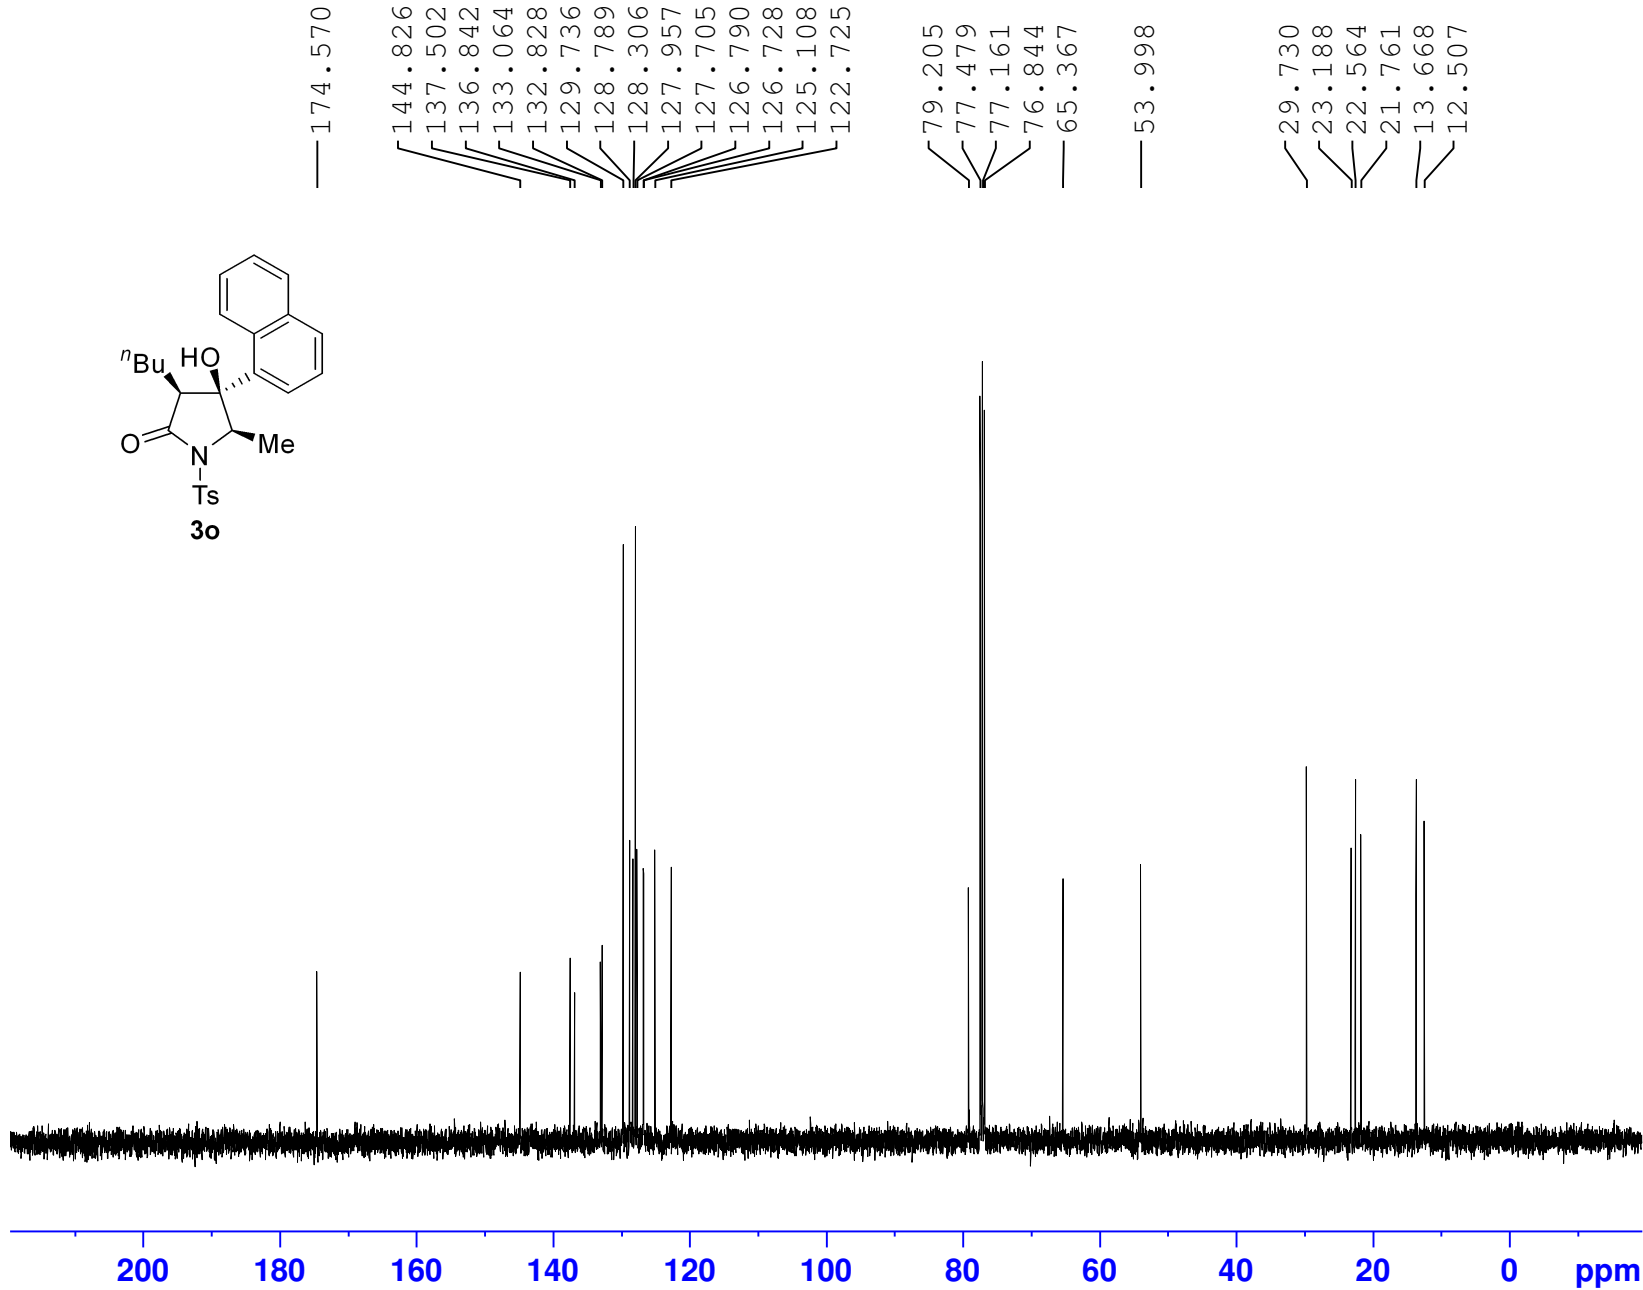

Current Data Parameters  
NAME qh-11159-2  
EXPNO 2  
PROCNO 1

F2 - Acquisition Parameters  
Date\_ 20150401  
Time 19.53  
INSTRUM spect  
PROBHD 5 mm PABBO BB/  
PULPROG zgpg30  
TD 65536  
SOLVENT CDC13  
NS 27  
DS 2  
SWH 24038.461 Hz  
FIDRES 0.366798 Hz  
AQ 1.3631488 sec  
RG 196.92  
DW 20.800 usec  
DE 6.50 usec  
TE 297.1 K  
D1 2.00000000 sec  
D11 0.03000000 sec  
TD0 1

==== CHANNEL f1 =====  
SFO1 100.6228298 MHz  
NUC1 13C  
P1 9.70 usec  
PLW1 46.98899841 W

==== CHANNEL f2 =====  
SFO2 400.1316005 MHz  
NUC2 1H  
CPDPRG[2] waltz16  
PCPD2 90.00 usec  
PLW2 11.99499989 W  
PLW12 0.34213999 W  
PLW13 0.27713001 W

F2 - Processing parameters  
SI 32768  
SF 100.6127627 MHz  
WDW EM  
SSB 0  
LB 1.00 Hz  
GB 0  
PC 1.40



Current Data Parameters  
NAME ss-qh-1160-2  
EXPNO 1  
PROCNO 1

F2 - Acquisition Parameters  
Date\_ 20200811  
Time 20.27  
INSTRUM spect  
PROBHD 5 mm PABBO BB/  
PULPROG zg30  
TD 65536  
SOLVENT CDCl3  
NS 6  
DS 0  
SWH 8012.820 Hz  
FIDRES 0.122266 Hz  
AQ 4.0894465 sec  
RG 27.78  
DW 62.400 usec  
DE 6.50 usec  
TE 297.1 K  
D1 1.00000000 sec  
TD0 1

==== CHANNEL f1 =====  
SFO1 400.1324710 MHz  
NUC1 1H  
P1 14.50 usec  
PLW1 11.99499989 W

F2 - Processing parameters  
SI 65536  
SF 400.1300100 MHz  
WDW EM  
SSB 0  
LB 0.30 Hz  
GB 0  
PC 1.00

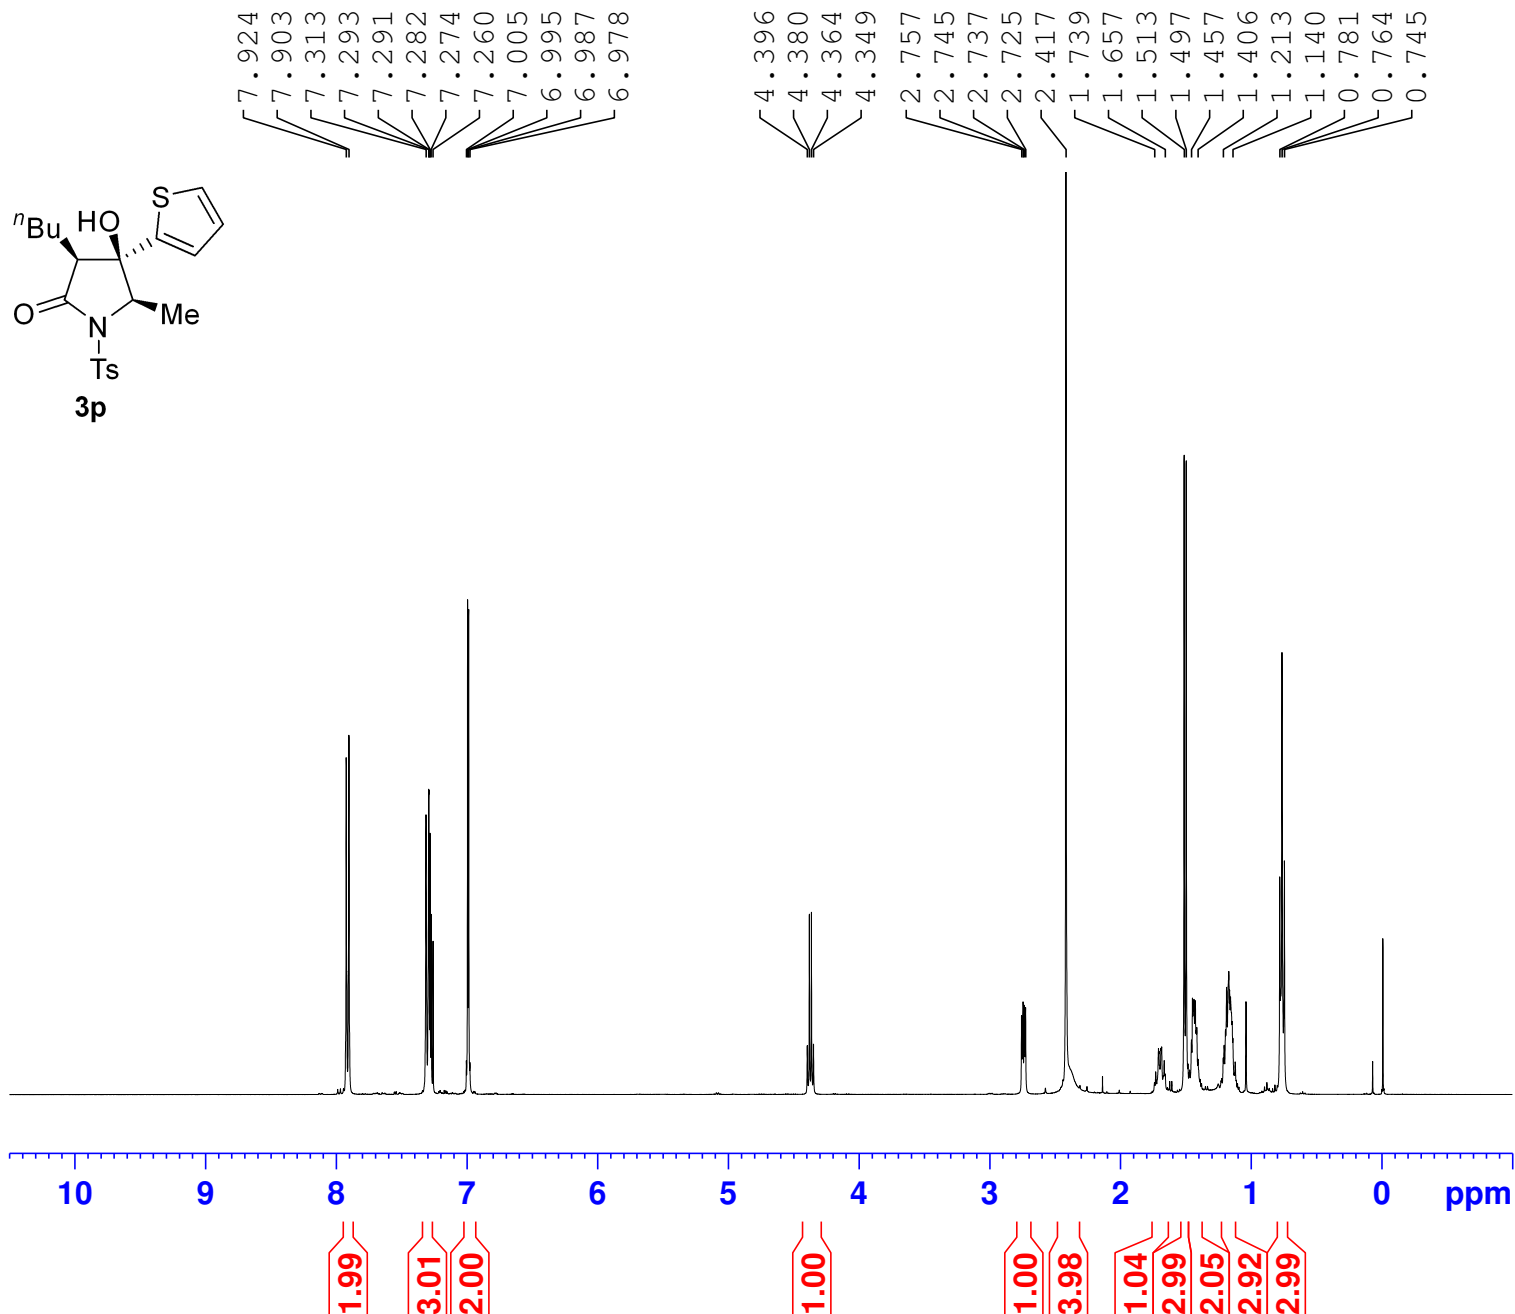

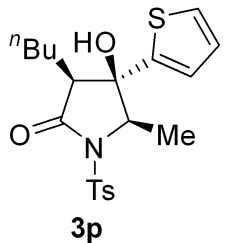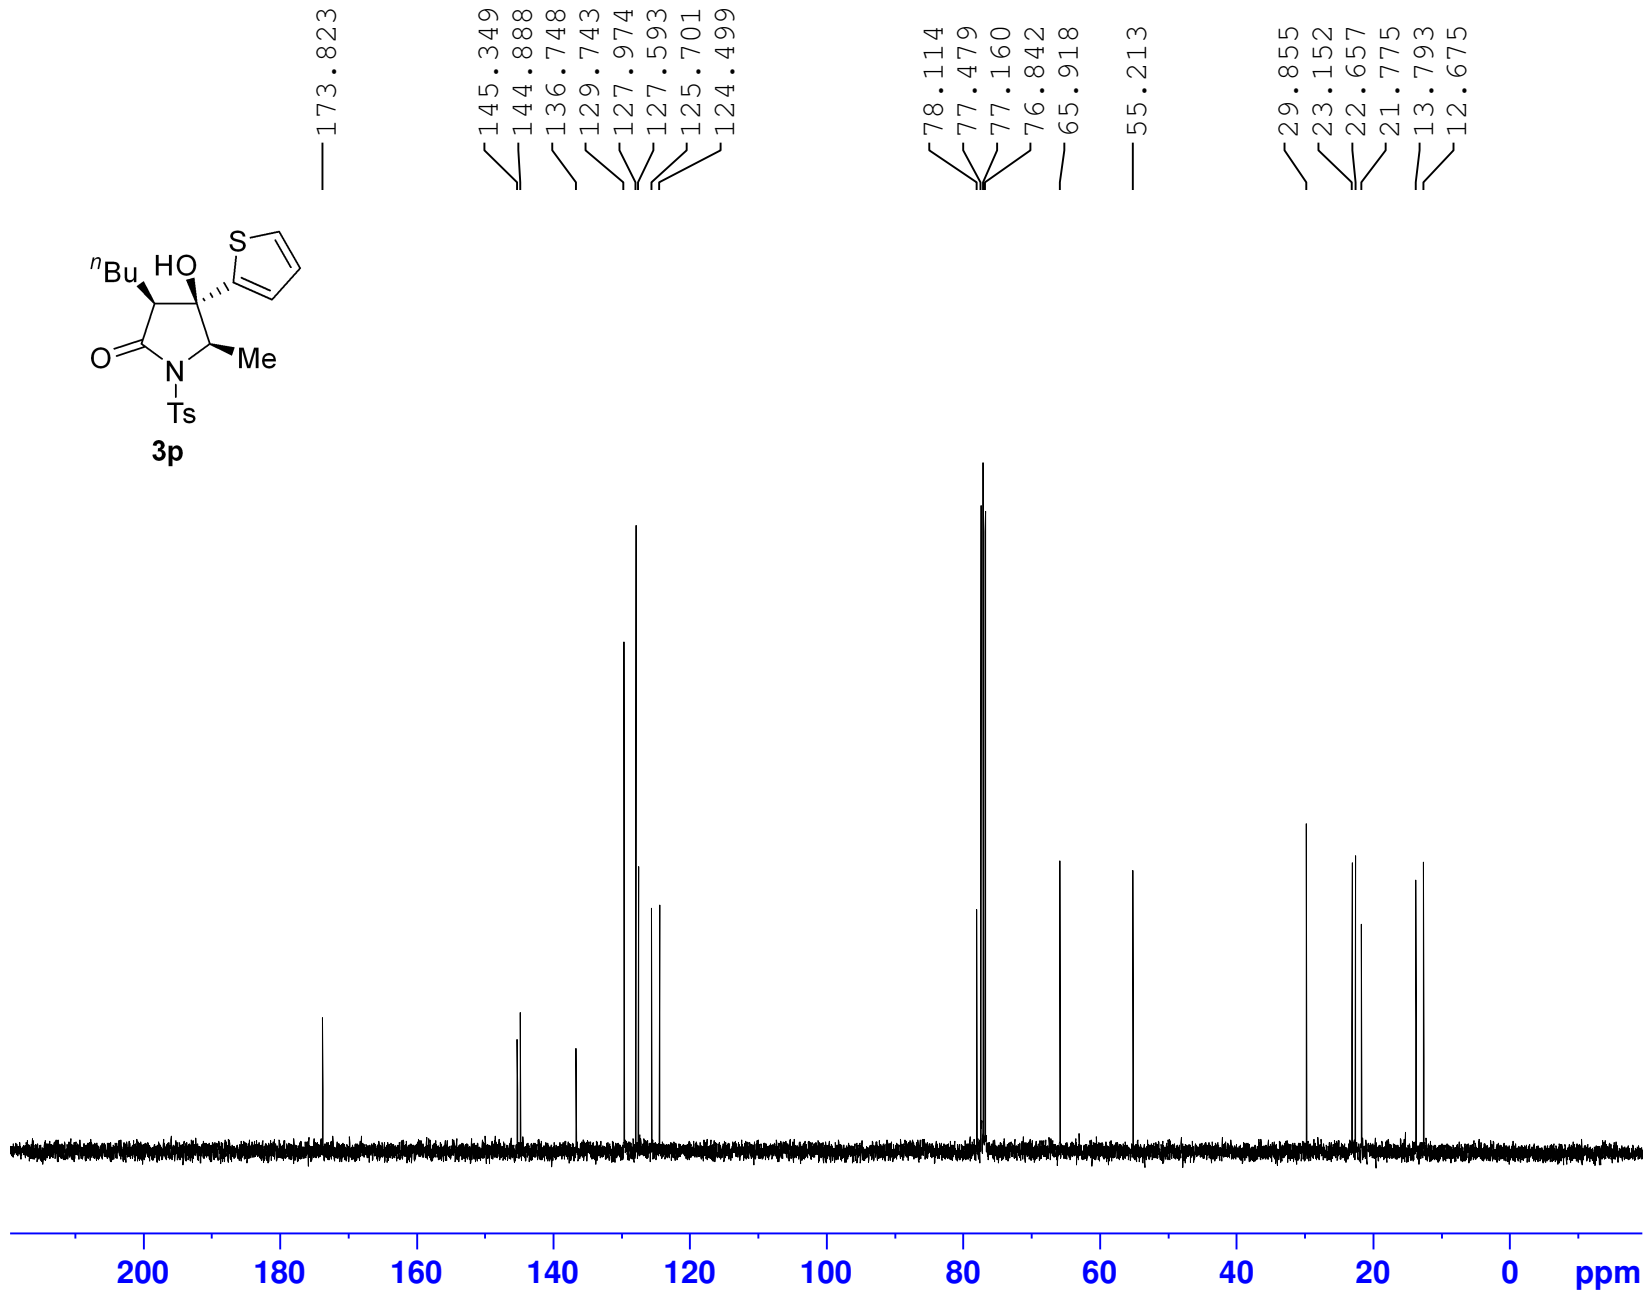

— 173.823

145.349  
144.888  
136.748  
129.743  
127.974  
127.593  
125.701  
124.499

78.114  
77.479  
77.160  
76.842  
65.918

— 55.213

29.855  
23.152  
22.657  
21.775  
13.793  
12.675

Current Data Parameters  
 NAME qh-11160-2  
 EXPNO 2  
 PROCNO 1

F2 - Acquisition Parameters  
 Date\_ 20150128  
 Time 19.20  
 INSTRUM spect  
 PROBHD 5 mm PABBO BB/  
 PULPROG zgpg30  
 TD 65536  
 SOLVENT CDC13  
 NS 51  
 DS 2  
 SWH 24038.461 Hz  
 FIDRES 0.366798 Hz  
 AQ 1.3631488 sec  
 RG 196.92  
 DW 20.800 usec  
 DE 6.50 usec  
 TE 296.7 K  
 D1 2.00000000 sec  
 D11 0.03000000 sec  
 TD0 1

==== CHANNEL f1 =====  
 SFO1 100.6228298 MHz  
 NUC1 13C  
 P1 9.70 usec  
 PLW1 46.98899841 W

==== CHANNEL f2 =====  
 SFO2 400.1316005 MHz  
 NUC2 1H  
 CPDPRG[2] waltz16  
 PCPD2 90.00 usec  
 PLW2 11.99499989 W  
 PLW12 0.34213999 W  
 PLW13 0.27713001 W

F2 - Processing parameters  
 SI 32768  
 SF 100.6127604 MHz  
 WDW EM  
 SSB 0  
 LB 1.00 Hz  
 GB 0  
 PC 1.40



7.754  
7.733  
7.388  
7.381  
7.376  
7.369  
7.351  
7.336  
7.329  
7.278  
7.260  
7.199  
7.183  
7.179  
5.021  
2.434  
2.375  
2.360  
2.345  
1.747  
1.743  
1.739  
1.725  
1.718  
1.706  
1.688  
1.633  
1.629  
1.622  
1.612  
1.604  
1.598  
1.594  
1.586  
1.575  
1.411  
1.395  
1.383  
1.373  
1.356  
1.338  
1.327  
1.302  
1.028  
1.026  
0.918  
0.900  
0.882

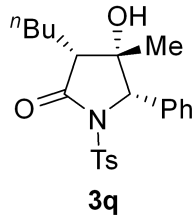

Current Data Parameters  
NAME qh-11131-4  
EXPNO 1  
PROCNO 1

F2 - Acquisition Parameters  
Date\_ 20150115  
Time 19.15  
INSTRUM spect  
PROBHD 5 mm DUL 13C-1  
PULPROG zg30  
TD 65536  
SOLVENT CDC13  
NS 2  
DS 0  
SWH 8012.820 Hz  
FIDRES 0.122266 Hz  
AQ 4.0894465 sec  
RG 126.97  
DW 62.400 usec  
DE 6.50 usec  
TE 295.8 K  
D1 1.00000000 sec  
TD0 1

==== CHANNEL f1 =====  
SFO1 400.1324710 MHz  
NUC1 1H  
P1 14.30 usec  
PLW1 9.10000038 W

F2 - Processing parameters  
SI 65536  
SF 400.1300097 MHz  
WDW EM  
SSB 0  
LB 0.30 Hz  
GB 0  
PC 1.00

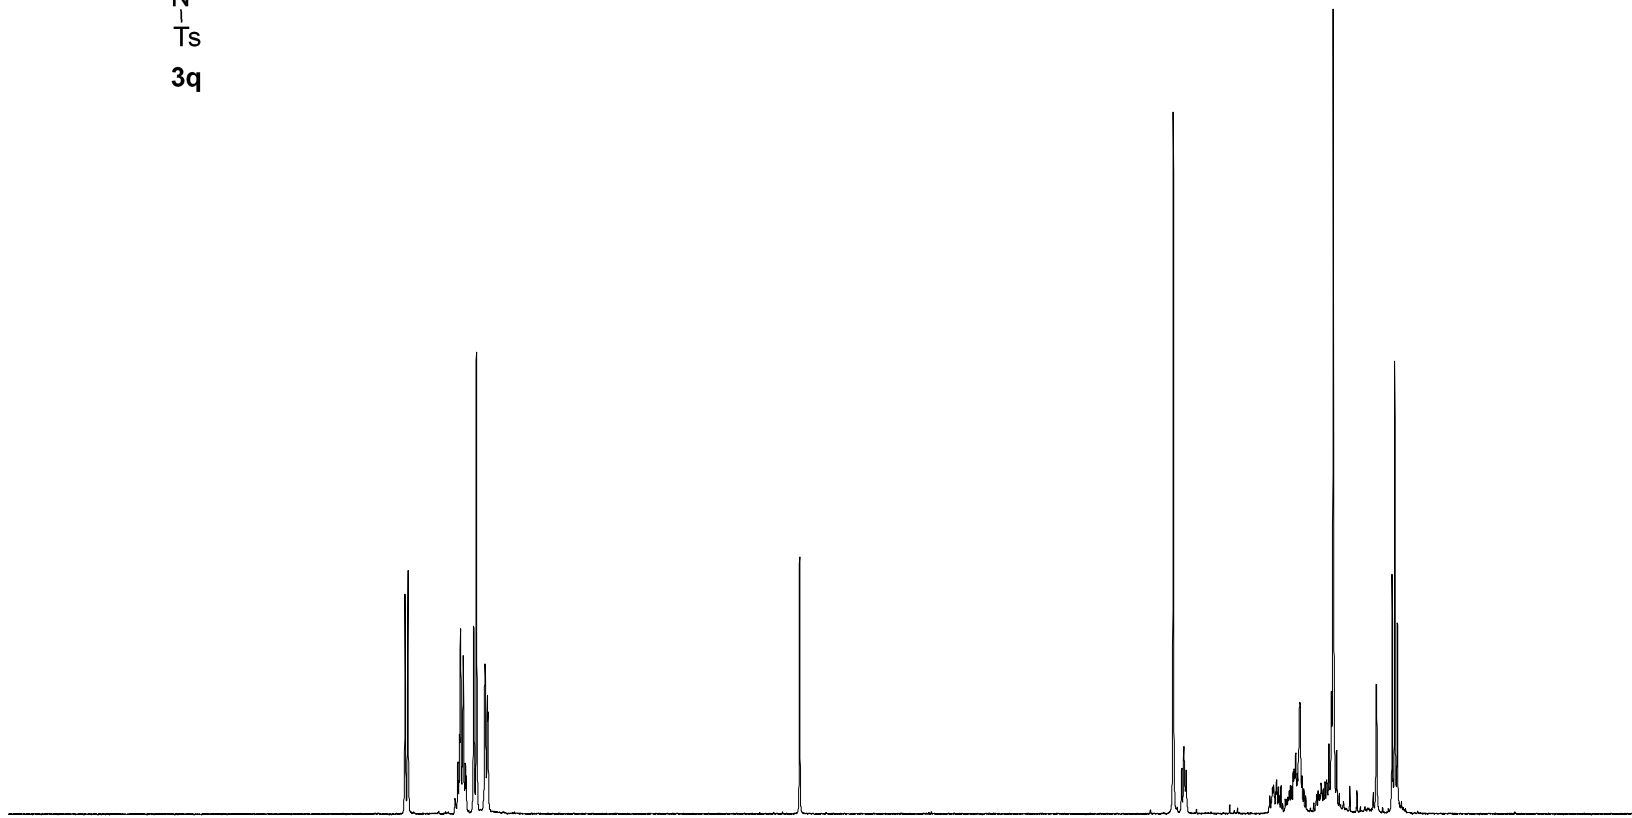

2.00  
3.07  
2.80  
2.09

1.03

3.07  
1.08  
1.09  
2.06  
6.43  
1.07  
3.21

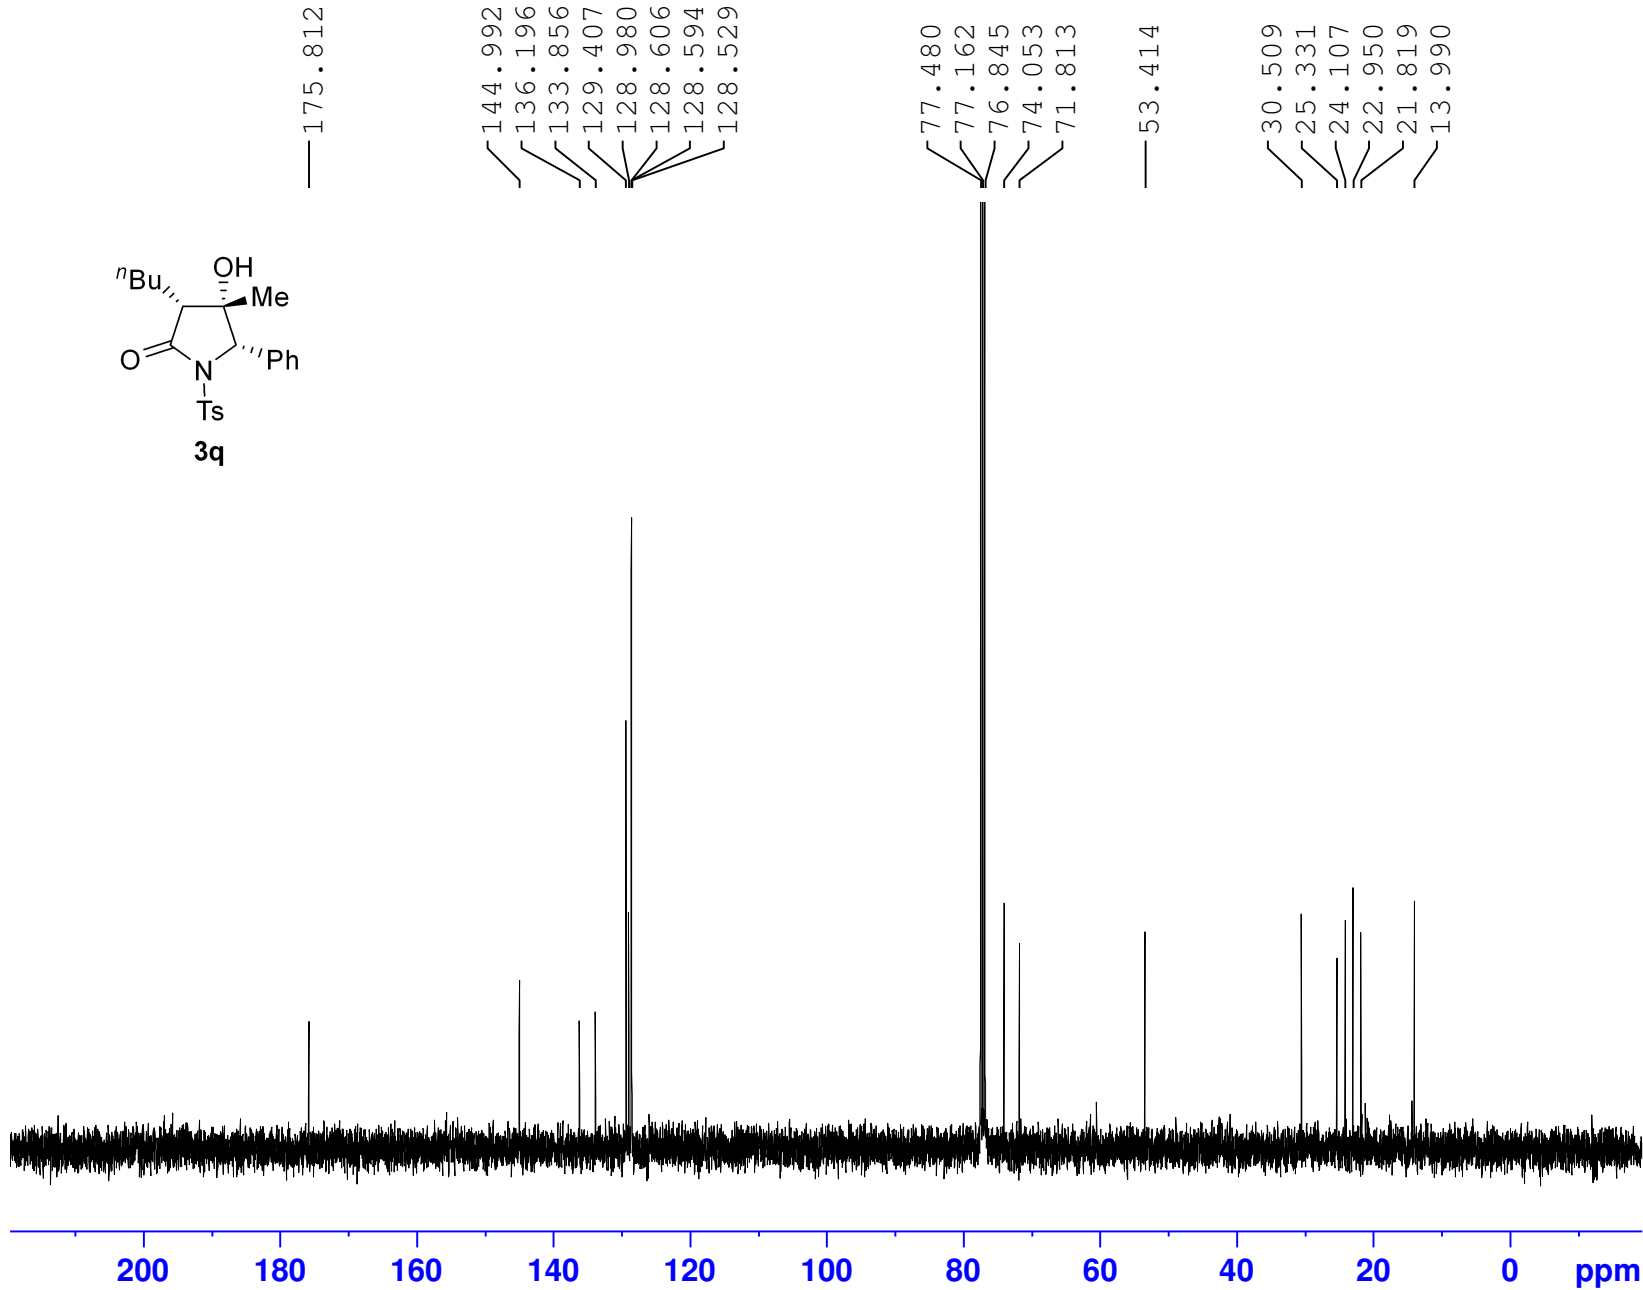

Current Data Parameters  
NAME qh-11131-4a  
EXPNO 2  
PROCNO 1

F2 - Acquisition Parameters  
Date\_ 20150115  
Time 16.57  
INSTRUM spect  
PROBHD 5 mm DUL 13C-1  
PULPROG zgpg30  
TD 65536  
SOLVENT CDC13  
NS 107  
DS 2  
SWH 24038.461 Hz  
FIDRES 0.366798 Hz  
AQ 1.3631488 sec  
RG 196.92  
DW 20.800 usec  
DE 6.50 usec  
TE 296.5 K  
D1 2.00000000 sec  
D11 0.03000000 sec  
TD0 1

==== CHANNEL f1 =====  
SFO1 100.6228298 MHz  
NUC1 13C  
P1 9.60 usec  
PLW1 31.98900032 W

==== CHANNEL f2 =====  
SFO2 400.1316005 MHz  
NUC2 1H  
CPDPRG[2] waltz16  
PCPD2 90.00 usec  
PLW2 9.10000038 W  
PLW12 0.24608000 W  
PLW13 0.19933000 W

F2 - Processing parameters  
SI 32768  
SF 100.6127568 MHz  
WDW EM  
SSB 0  
LB 1.00 Hz  
GB 0  
PC 1.40

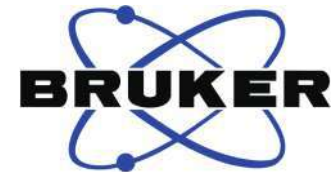

7.962  
7.941  
7.447  
7.444  
7.425  
7.395  
7.390  
7.377  
7.355  
7.353  
7.333  
7.315  
7.312  
7.308  
7.299  
7.294  
7.288  
7.279  
7.276  
7.260

4.180  
4.164  
4.148  
4.133

— 2.870  
— 2.445  
— 2.086

< 1.328  
< 1.313  
— 0.929

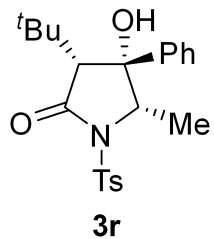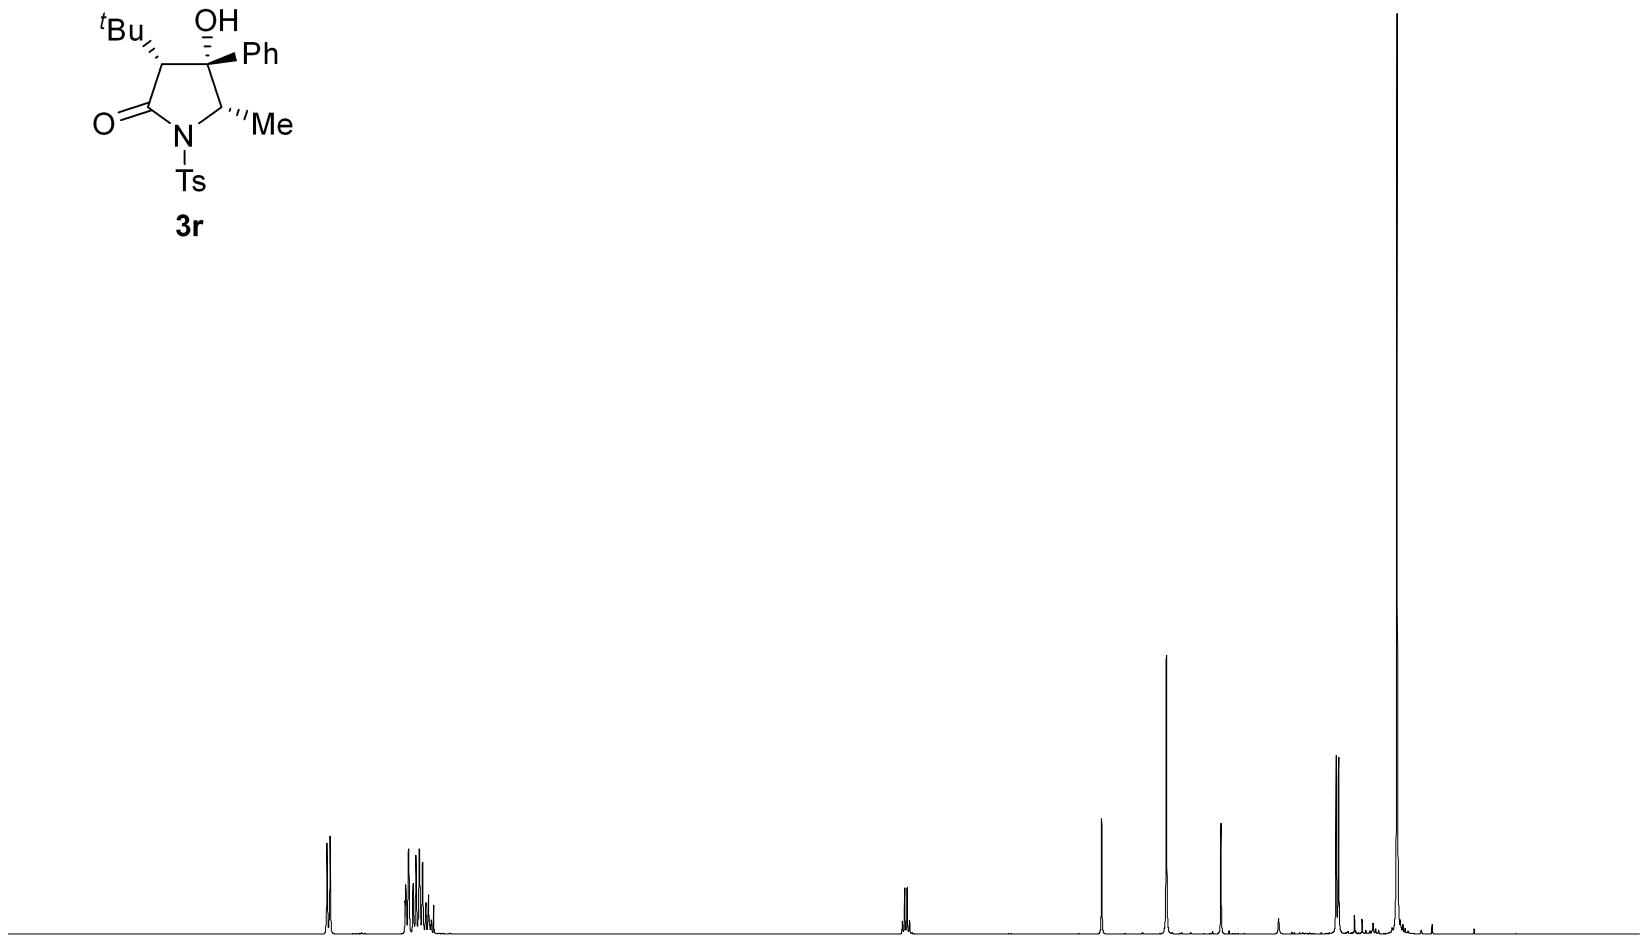

Current Data Parameters  
NAME qh-11135-1  
EXPNO 1  
PROCNO 1

F2 - Acquisition Parameters  
Date\_ 20150114  
Time 18.17  
INSTRUM spect  
PROBHD 5 mm DUL 13C-1  
PULPROG zg30  
TD 65536  
SOLVENT CDC13  
NS 2  
DS 0  
SWH 8012.820 Hz  
FIDRES 0.122266 Hz  
AQ 4.0894465 sec  
RG 31.55  
DW 62.400 usec  
DE 6.50 usec  
TE 295.9 K  
D1 1.00000000 sec  
TD0 1

==== CHANNEL f1 =====  
SFO1 400.1324710 MHz  
NUC1 1H  
P1 14.30 usec  
PLW1 9.10000038 W

F2 - Processing parameters  
SI 65536  
SF 400.1300095 MHz  
WDW EM  
SSB 0  
LB 0.30 Hz  
GB 0  
PC 1.00

1.98  
2.00  
4.06  
1.07

1.00

1.00

3.06

0.98

3.06

9.10

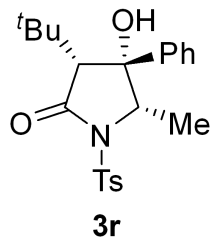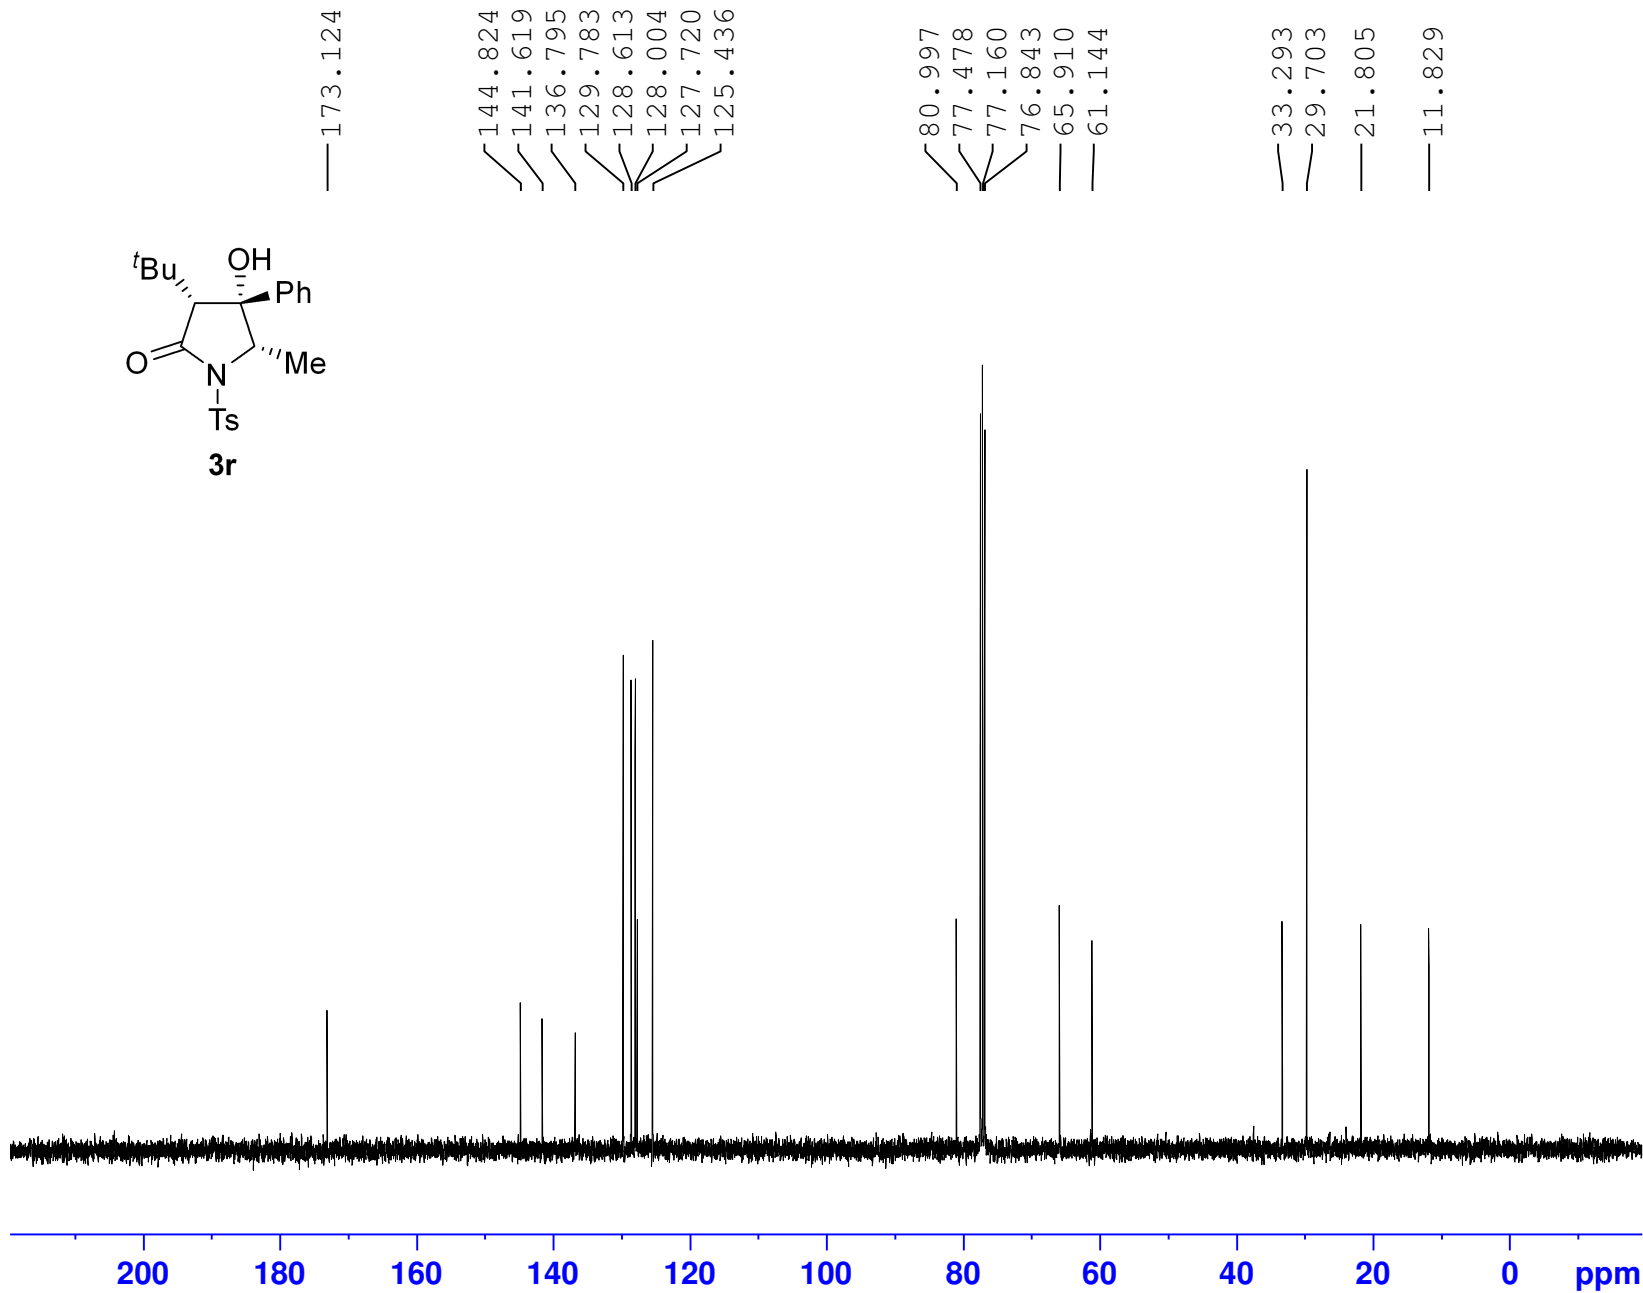

Current Data Parameters  
NAME qh-11135-1  
EXPNO 2  
PROCNO 1

F2 - Acquisition Parameters  
Date\_ 20150114  
Time 18.21  
INSTRUM spect  
PROBHD 5 mm DUL 13C-1  
PULPROG zgpg30  
TD 65536  
SOLVENT CDC13  
NS 68  
DS 2  
SWH 24038.461 Hz  
FIDRES 0.366798 Hz  
AQ 1.3631488 sec  
RG 196.92  
DW 20.800 usec  
DE 6.50 usec  
TE 296.4 K  
D1 2.00000000 sec  
D11 0.03000000 sec  
TD0 1

==== CHANNEL f1 =====  
SFO1 100.6228298 MHz  
NUC1 13C  
P1 9.60 usec  
PLW1 31.98900032 W

==== CHANNEL f2 =====  
SFO2 400.1316005 MHz  
NUC2 1H  
CPDPRG[2] waltz16  
PCPD2 90.00 usec  
PLW2 9.10000038 W  
PLW12 0.24608000 W  
PLW13 0.19933000 W

F2 - Processing parameters  
SI 32768  
SF 100.6127597 MHz  
WDW EM  
SSB 0  
LB 1.00 Hz  
GB 0  
PC 1.40

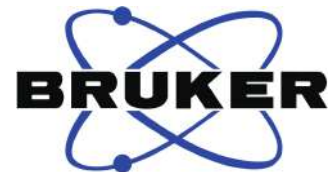

Current Data Parameters  
NAME ss-qh-11137  
EXPNO 1  
PROCNO 1

F2 - Acquisition Parameters  
Date\_ 20200811  
Time 20.04  
INSTRUM spect  
PROBHD 5 mm PABBO BB/  
PULPROG zg30  
TD 65536  
SOLVENT CDC13  
NS 6  
DS 0  
SWH 8012.820 Hz  
FIDRES 0.122266 Hz  
AQ 4.0894465 sec  
RG 27.78  
DW 62.400 usec  
DE 6.50 usec  
TE 297.9 K  
D1 1.00000000 sec  
TD0 1

==== CHANNEL f1 =====  
SFO1 400.1324710 MHz  
NUC1 1H  
P1 14.50 usec  
PLW1 11.99499989 W

F2 - Processing parameters  
SI 65536  
SF 400.1300098 MHz  
WDW EM  
SSB 0  
LB 0.30 Hz  
GB 0  
PC 1.00

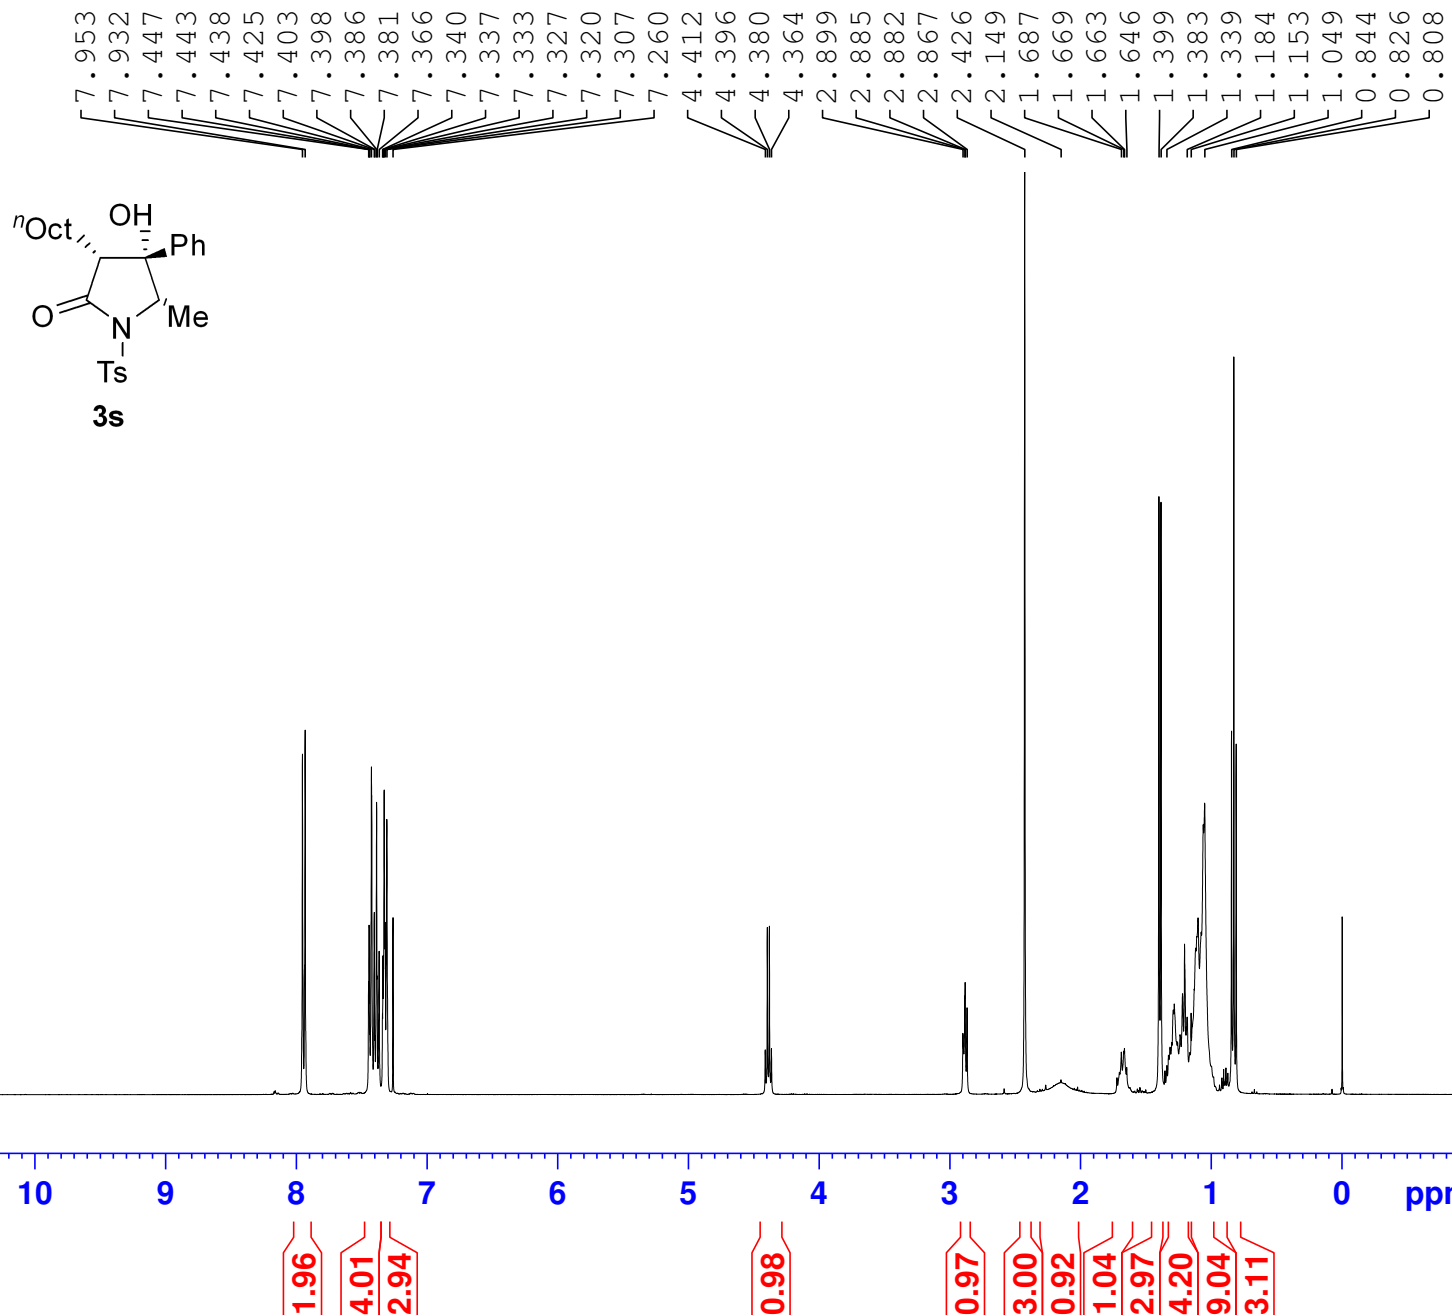



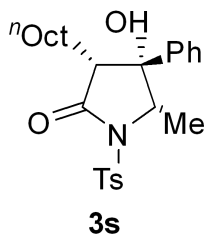

— 174.570

144.786  
140.141  
136.895  
129.728  
128.791  
128.141  
127.939  
125.365

79.026  
77.479  
77.161  
76.843  
65.587

— 54.068

31.830  
29.425  
29.164  
27.498  
23.320  
22.664  
21.756  
14.148  
12.325

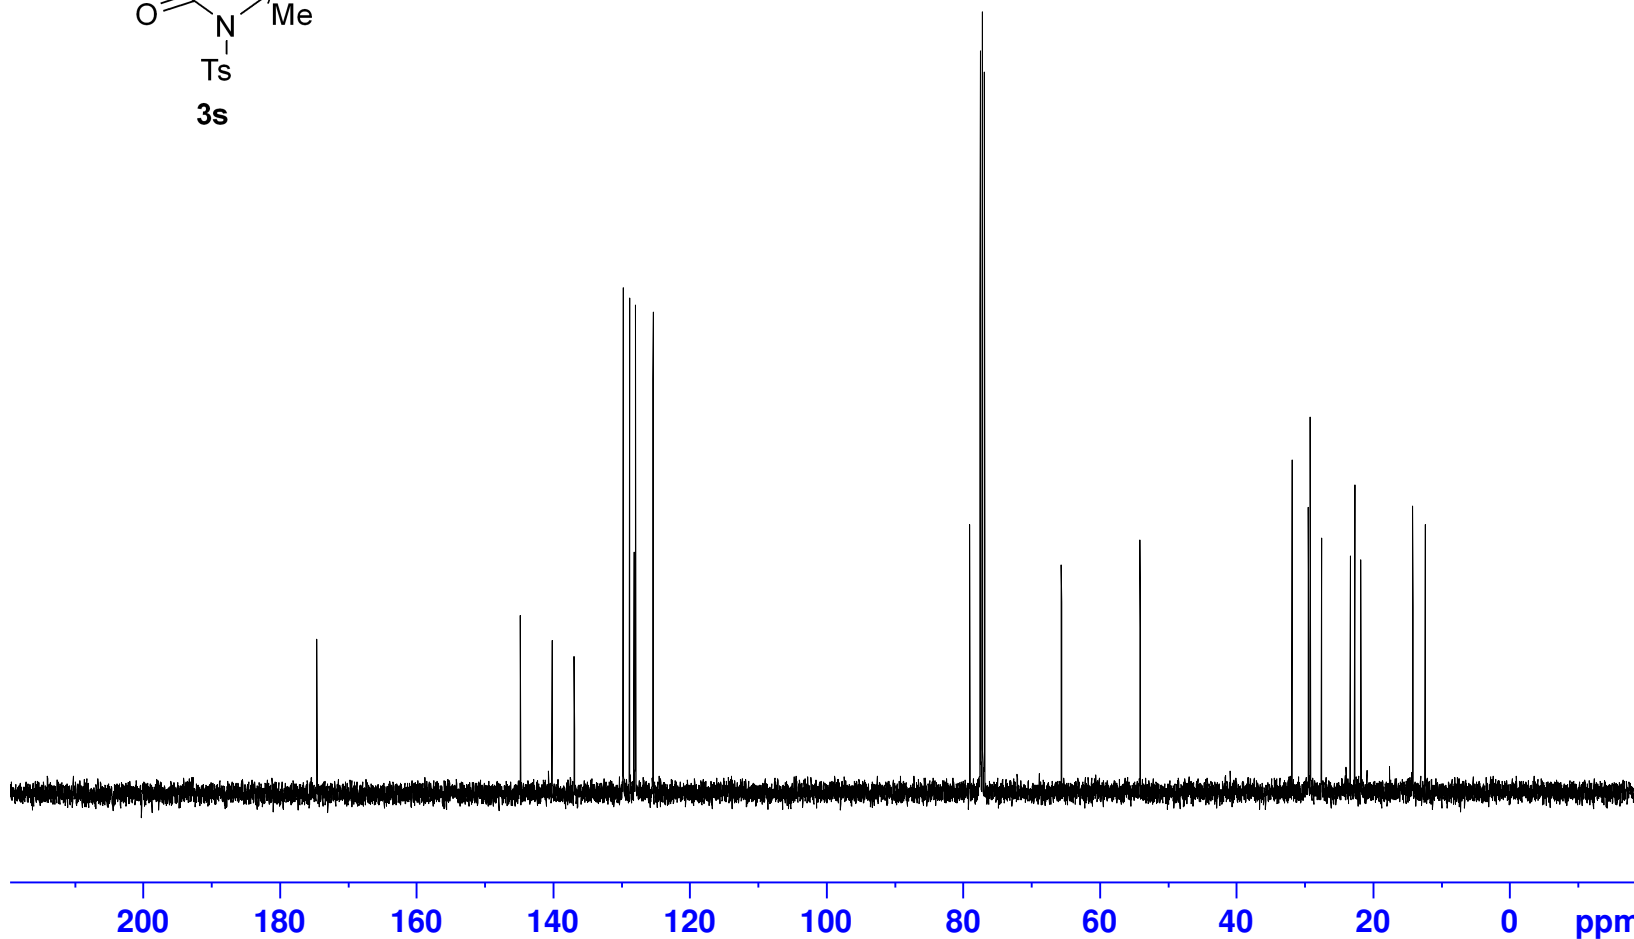

Current Data Parameters  
NAME qh-11137  
EXPNO 2  
PROCNO 1

F2 - Acquisition Parameters  
Date\_ 20150117  
Time 16.12  
INSTRUM spect  
PROBHD 5 mm DUL 13C-1  
PULPROG zgpg30  
TD 65536  
SOLVENT CDC13  
NS 50  
DS 2  
SWH 24038.461 Hz  
FIDRES 0.366798 Hz  
AQ 1.3631488 sec  
RG 196.92  
DW 20.800 usec  
DE 6.50 usec  
TE 296.5 K  
D1 2.00000000 sec  
D11 0.03000000 sec  
TD0 1

==== CHANNEL f1 =====  
SFO1 100.6228298 MHz  
NUC1 13C  
P1 9.60 usec  
PLW1 31.98900032 W

==== CHANNEL f2 =====  
SFO2 400.1316005 MHz  
NUC2 1H  
CPDPRG[2] waltz16  
PCPD2 90.00 usec  
PLW2 9.10000038 W  
PLW12 0.24608000 W  
PLW13 0.19933000 W

F2 - Processing parameters  
SI 32768  
SF 100.6127619 MHz  
WDW EM  
SSB 0  
LB 1.00 Hz  
GB 0  
PC 1.40

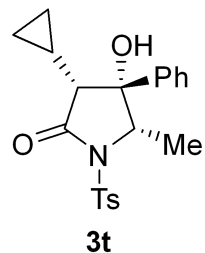

7.966  
7.945  
7.406  
7.387  
7.369  
7.340  
7.319  
7.260

4.413  
4.397  
4.381  
4.366  
2.443  
2.399  
2.378  
2.353  
1.450  
1.434  
0.824  
0.812  
0.802  
0.791  
0.780  
0.771  
0.671  
0.661  
0.649  
0.636  
0.628  
0.363  
0.351  
0.340  
0.327

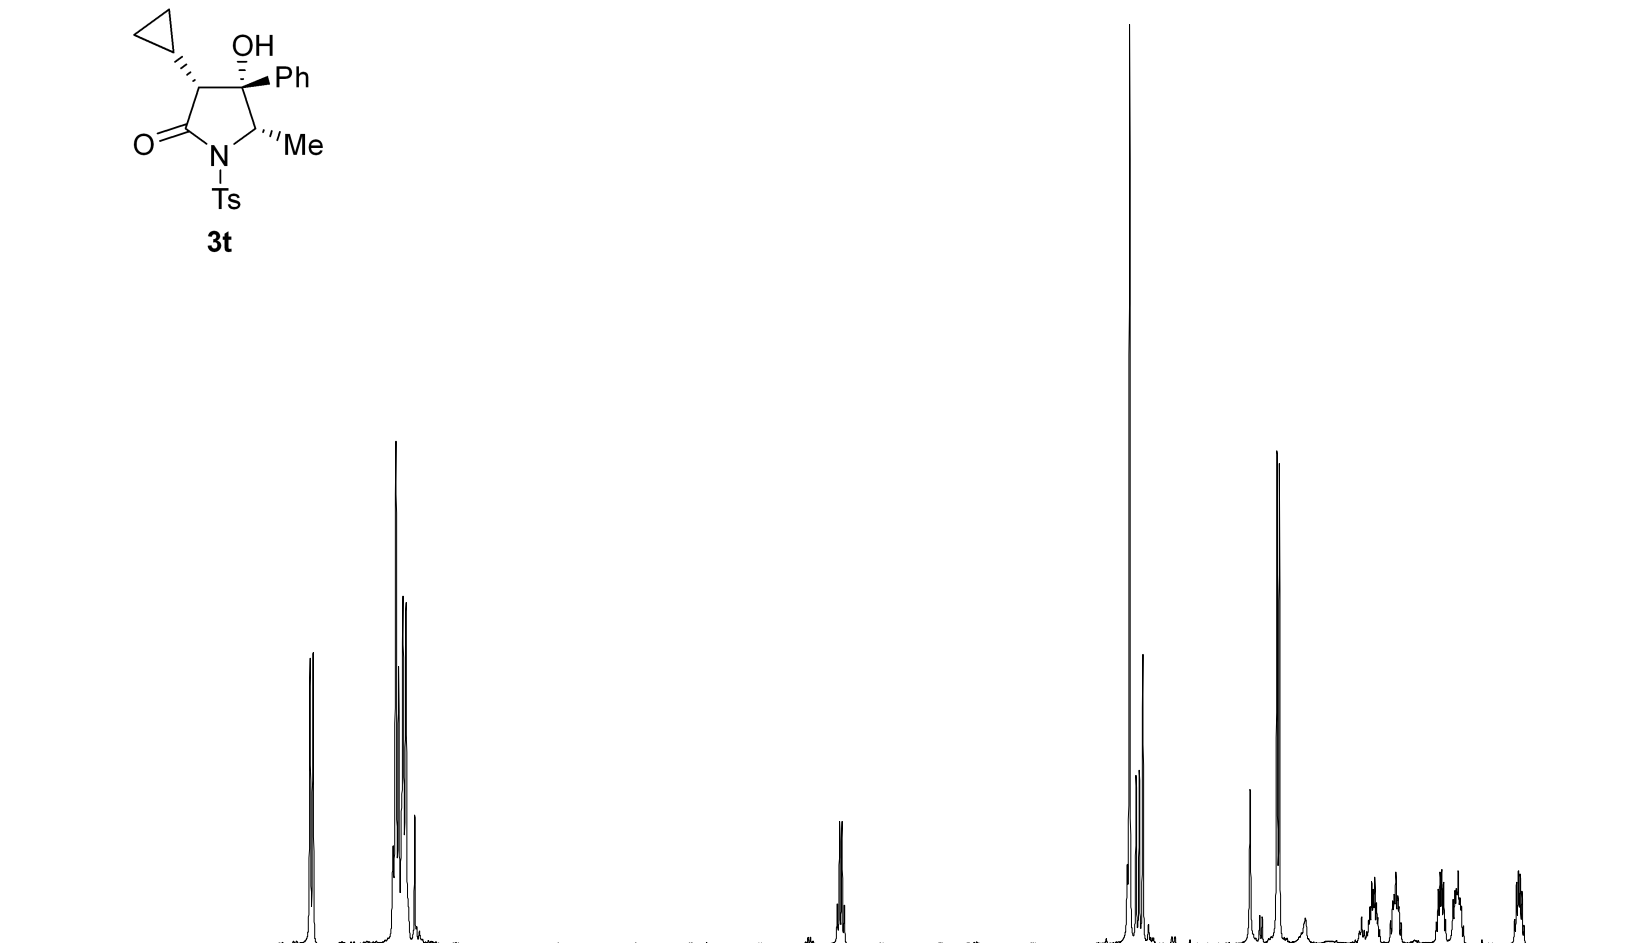

9 8 7 6 5 4 3 2 1 0 ppm

2.08

7.24

1.00

3.18

1.07

0.91

3.02

1.06

1.02

1.05

1.22

0.98

S-122

Current Data Parameters  
NAME qh-11168-1  
EXPNO 3  
PROCNO 1

F2 - Acquisition Parameters  
Date\_ 20150401  
Time 18.45  
INSTRUM spect  
PROBHD 5 mm PABBO BB/  
PULPROG zg30  
TD 65536  
SOLVENT CDCl3  
NS 2  
DS 0  
SWH 8012.820 Hz  
FIDRES 0.122266 Hz  
AQ 4.0894465 sec  
RG 70.97  
DW 62.400 usec  
DE 6.50 usec  
TE 296.6 K  
D1 1.00000000 sec  
TD0 1

==== CHANNEL f1 =====  
SFO1 400.1324710 MHz  
NUC1 1H  
P1 14.50 usec  
PLW1 11.99499989 W

F2 - Processing parameters  
SI 65536  
SF 400.1300091 MHz  
WDW EM  
SSB 0  
LB 0.30 Hz  
GB 0  
PC 1.00

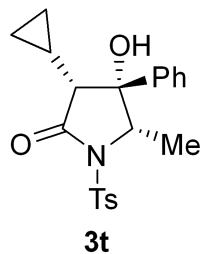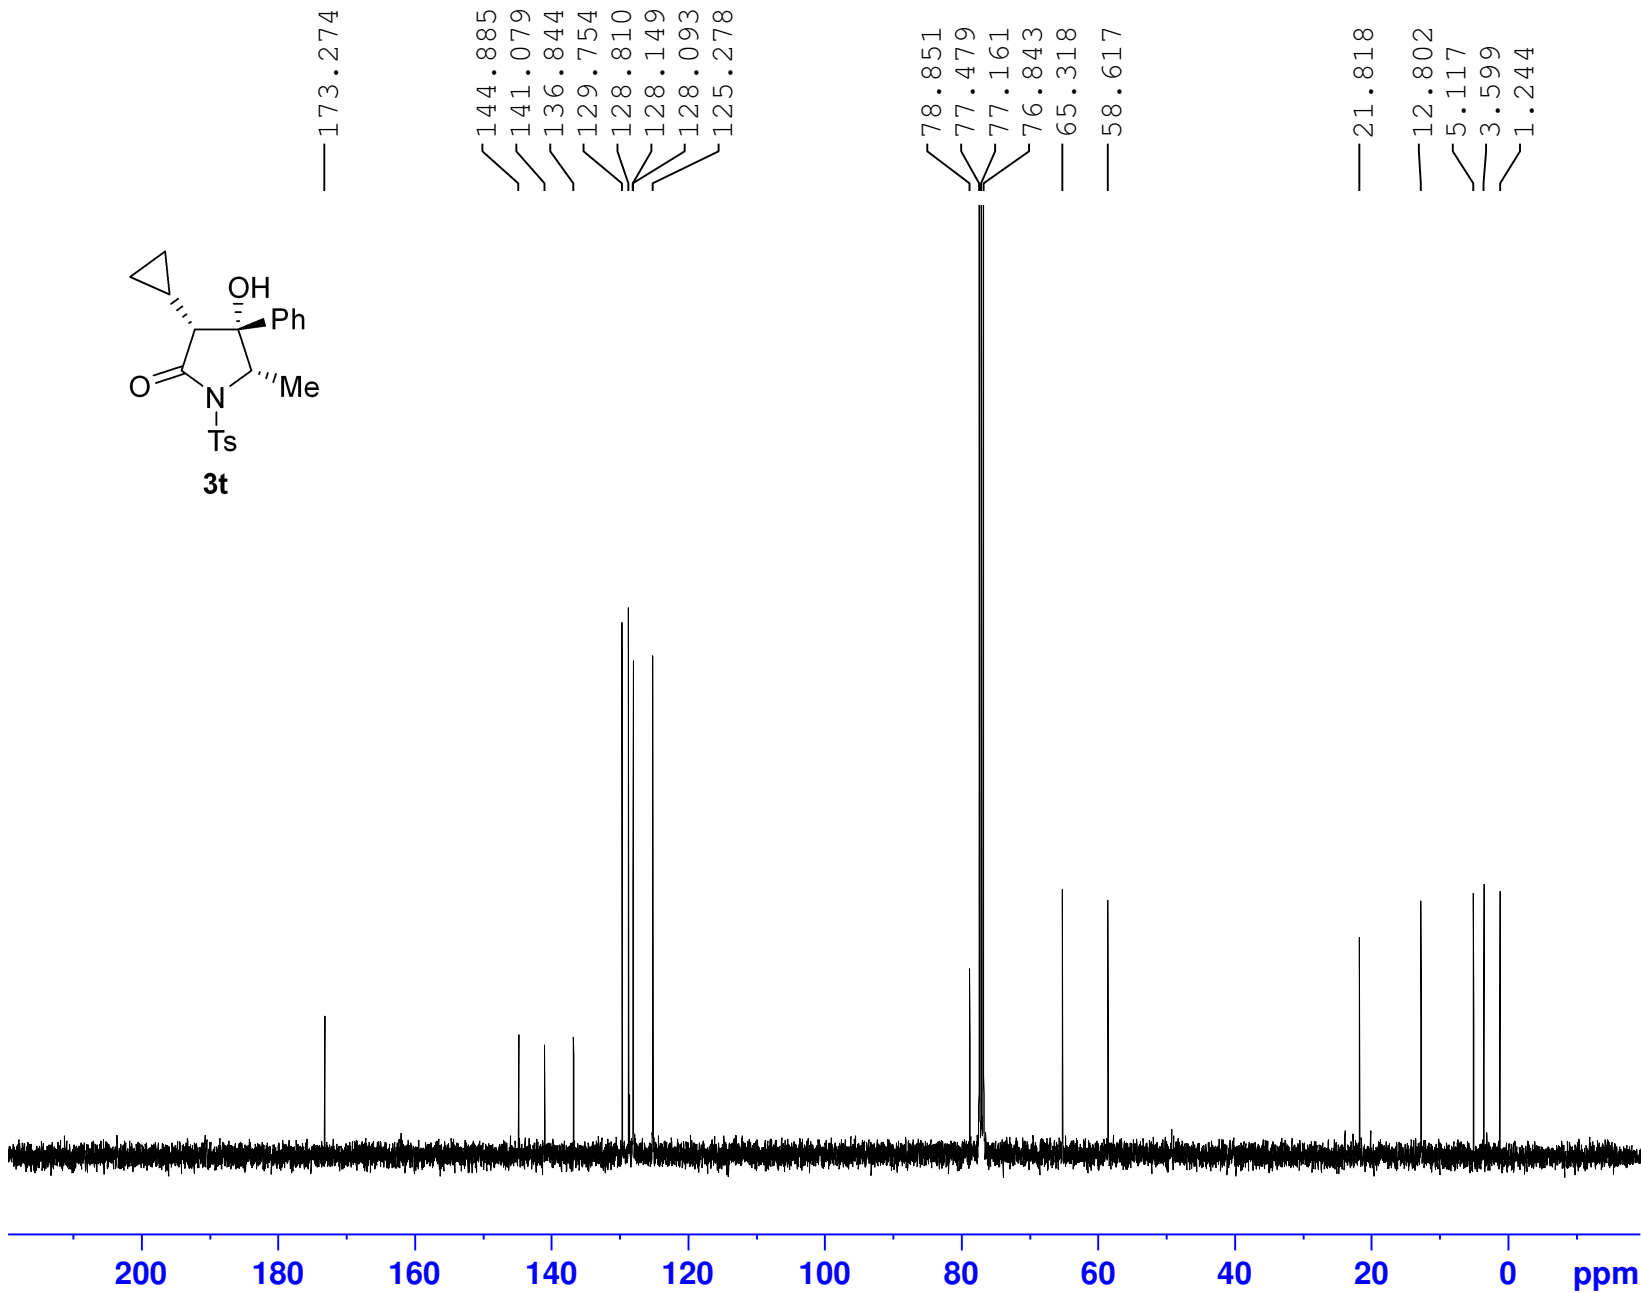

Current Data Parameters  
 NAME qh-11168-1  
 EXPNO 4  
 PROCNO 1

F2 - Acquisition Parameters  
 Date\_ 20150401  
 Time 18.53  
 INSTRUM spect  
 PROBHD 5 mm PABBO BB/  
 PULPROG zgpg30  
 TD 65536  
 SOLVENT CDC13  
 NS 134  
 DS 2  
 SWH 24038.461 Hz  
 FIDRES 0.366798 Hz  
 AQ 1.3631488 sec  
 RG 196.92  
 DW 20.800 usec  
 DE 6.50 usec  
 TE 297.5 K  
 D1 2.00000000 sec  
 D11 0.03000000 sec  
 TD0 1

===== CHANNEL f1 =====  
 SFO1 100.6228298 MHz  
 NUC1 13C  
 P1 9.70 usec  
 PLW1 46.98899841 W

===== CHANNEL f2 =====  
 SFO2 400.1316005 MHz  
 NUC2 1H  
 CPDPRG[2] waltz16  
 PCPD2 90.00 usec  
 PLW2 11.99499989 W  
 PLW12 0.34213999 W  
 PLW13 0.27713001 W

F2 - Processing parameters  
 SI 32768  
 SF 100.6127568 MHz  
 WDW EM  
 SSB 0  
 LB 1.00 Hz  
 GB 0  
 PC 1.40



7.957  
7.937  
7.438  
7.420  
7.389  
7.371  
7.352  
7.342  
7.322  
7.310  
7.292  
7.260  
4.385  
4.369  
4.353  
4.338  
3.481  
3.467  
3.452  
2.989  
2.973  
2.956  
2.441  
2.347  
1.819  
1.797  
1.781  
1.756  
1.688  
1.582  
1.562  
1.549  
1.533  
1.518  
1.508  
1.416  
1.400  
1.312  
1.304  
1.287  
1.270  
1.262  
1.253  
1.244  
1.235  
0.966  
0.955  
0.946

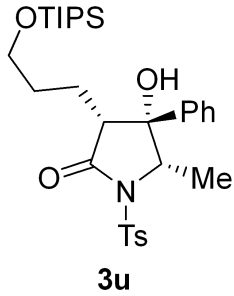

Current Data Parameters  
NAME qh-11168-2  
EXPNO 1  
PROCNO 1

F2 - Acquisition Parameters  
Date\_ 20150203  
Time 18.30  
INSTRUM spect  
PROBHD 5 mm PABBO BB/  
PULPROG zg30  
TD 65536  
SOLVENT CDC13  
NS 6  
DS 0  
SWH 8012.820 Hz  
FIDRES 0.122266 Hz  
AQ 4.0894465 sec  
RG 45.67  
DW 62.400 usec  
DE 6.50 usec  
TE 296.2 K  
D1 1.00000000 sec  
TD0 1

==== CHANNEL f1 =====  
SF01 400.1324710 MHz  
NUC1 1H  
P1 14.50 usec  
PLW1 11.99499989 W

F2 - Processing parameters  
SI 65536  
SF 400.1300093 MHz  
WDW EM  
SSB 0  
LB 0.30 Hz  
GB 0  
PC 1.00

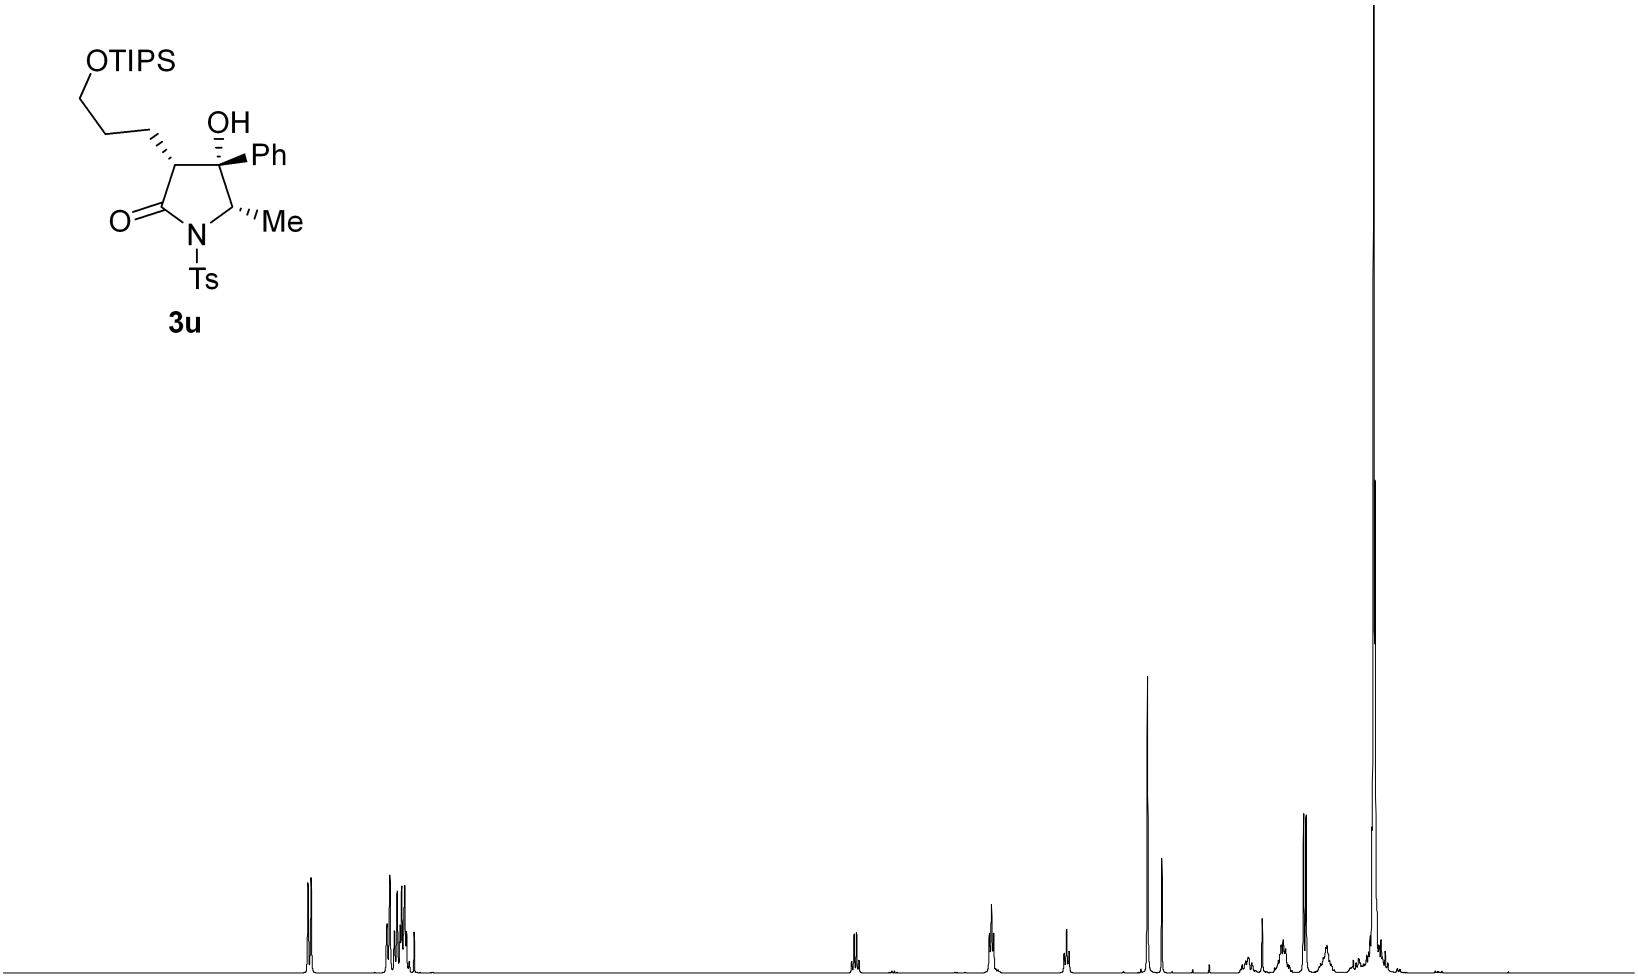

1.99  
2.03  
5.05

1.00

S-124

1.99  
0.99

3.03  
0.94

1.03

2.08

3.06

1.79

21.78

9 8 7 6 5 4 3 2 1 0 ppm

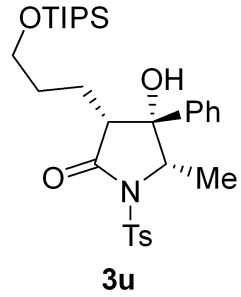

— 174.465

144.808  
140.711  
136.967  
129.758  
128.865  
128.153  
128.001  
125.378

78.779  
77.477  
77.159  
76.841  
65.771  
62.882  
53.936

30.292  
21.809  
19.929  
18.070  
12.438  
12.006

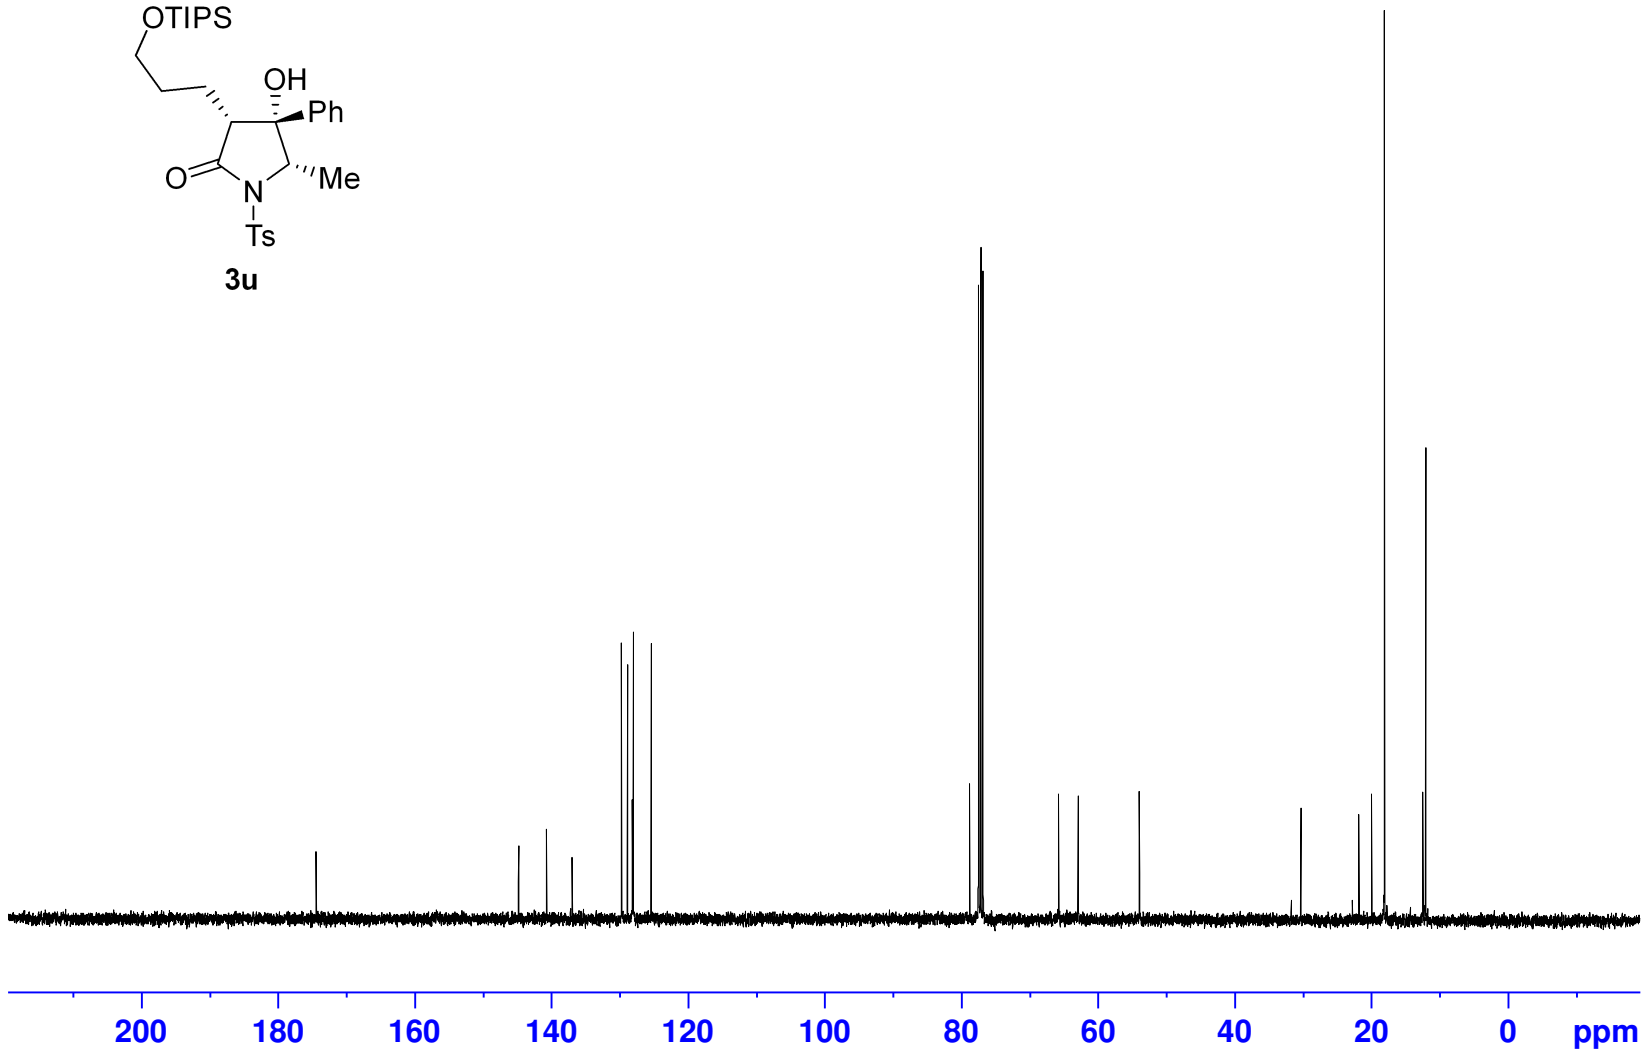

Current Data Parameters  
NAME qh-11168-2  
EXPNO 2  
PROCNO 1

F2 - Acquisition Parameters  
Date\_ 20150203  
Time 18.36  
INSTRUM spect  
PROBHD 5 mm PABBO BB/  
PULPROG zgpg30  
TD 65536  
SOLVENT CDC13  
NS 130  
DS 2  
SWH 24038.461 Hz  
FIDRES 0.366798 Hz  
AQ 1.3631488 sec  
RG 196.92  
DW 20.800 usec  
DE 6.50 usec  
TE 297.1 K  
D1 2.00000000 sec  
D11 0.03000000 sec  
TD0 1

==== CHANNEL f1 =====  
SFO1 100.6228298 MHz  
NUC1 13C  
P1 9.70 usec  
PLW1 46.98899841 W

==== CHANNEL f2 =====  
SFO2 400.1316005 MHz  
NUC2 1H  
CPDPRG[2] waltz16  
PCPD2 90.00 usec  
PLW2 11.99499989 W  
PLW12 0.34213999 W  
PLW13 0.27713001 W

F2 - Processing parameters  
SI 32768  
SF 100.6127568 MHz  
WDW EM  
SSB 0  
LB 1.00 Hz  
GB 0  
PC 1.40

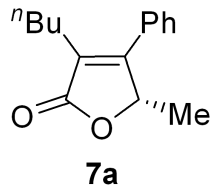

7.496  
7.491  
7.475  
7.456  
7.442  
7.435  
7.416  
7.316  
7.312  
7.296  
7.260  
5.382  
5.365  
5.348  
5.331  
2.469  
2.453  
2.435  
2.416  
2.400  
2.393  
2.377  
2.367  
2.359  
2.343  
1.608  
1.598  
1.591  
1.584  
1.575  
1.568  
1.559  
1.551  
1.535  
1.513  
1.498  
1.491  
1.476  
1.382  
1.364  
1.348  
1.332

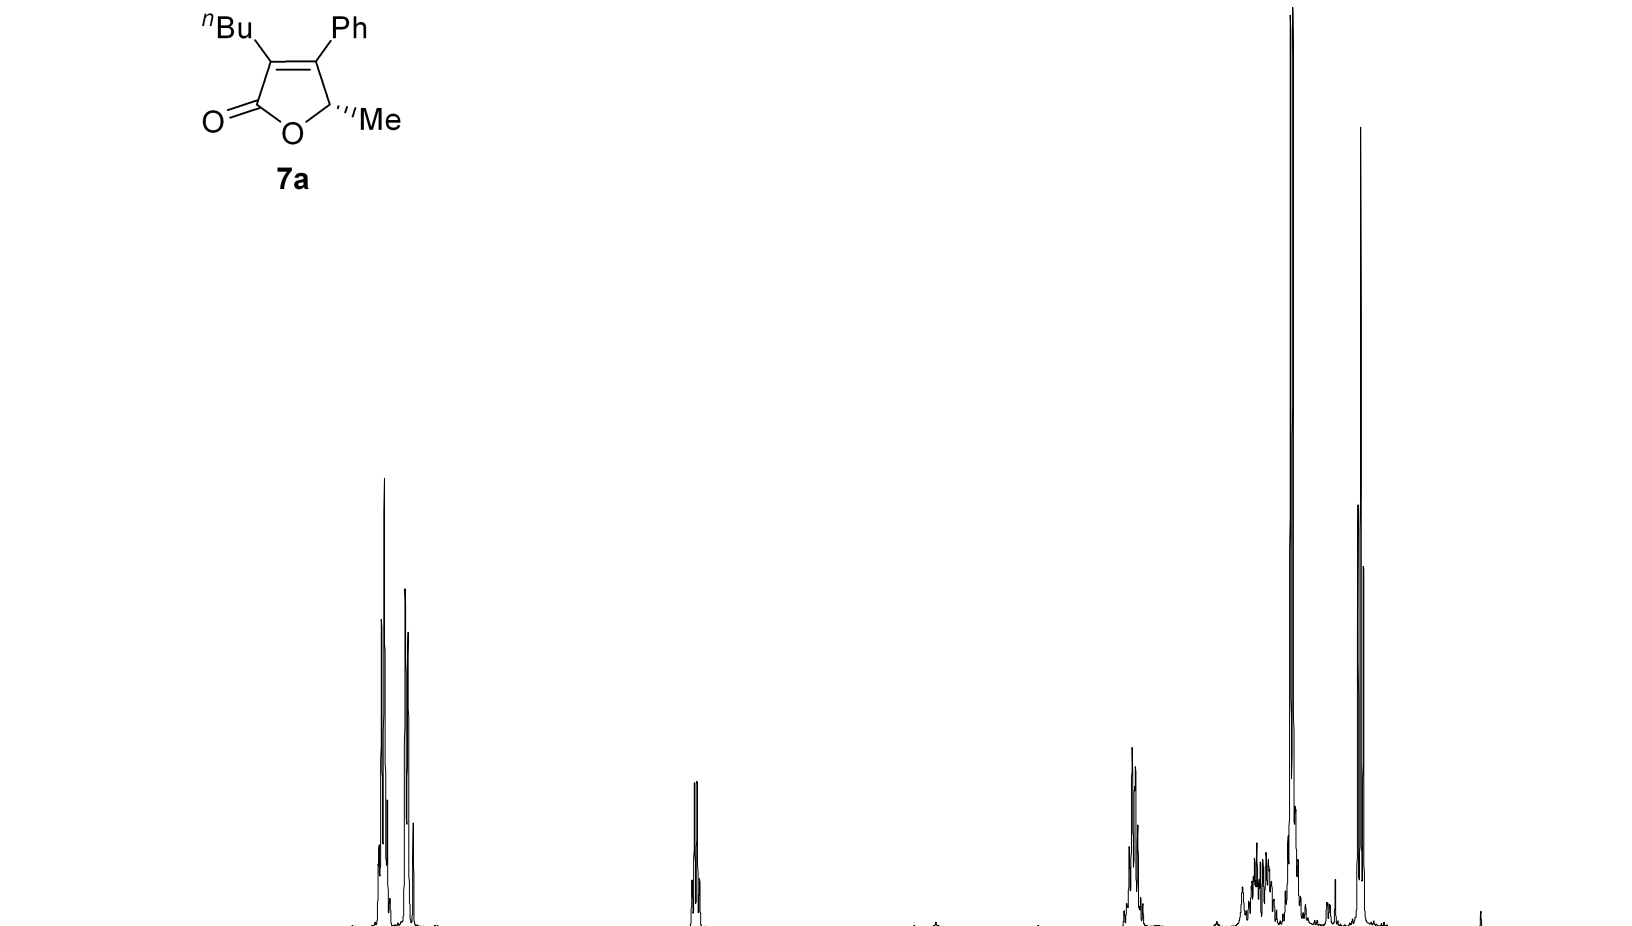

Current Data Parameters  
NAME qh-11273  
EXPNO 1  
PROCNO 1

F2 - Acquisition Parameters  
Date\_ 20150416  
Time 13.28  
INSTRUM spect  
PROBHD 5 mm PABBO BB/  
PULPROG zg30  
TD 65536  
SOLVENT CDCl3  
NS 2  
DS 0  
SWH 8012.820 Hz  
FIDRES 0.122266 Hz  
AQ 4.0894465 sec  
RG 54.81  
DW 62.400 usec  
DE 6.50 usec  
TE 296.3 K  
D1 1.00000000 sec  
TD0 1

==== CHANNEL f1 =====  
SFO1 400.1324710 MHz  
NUC1 1H  
P1 14.50 usec  
PLW1 11.99499989 W

F2 - Processing parameters  
SI 65536  
SF 400.1300087 MHz  
WDW EM  
SSB 0  
LB 0.30 Hz  
GB 0  
PC 1.00

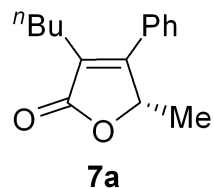

— 174.096

— 161.061

131.783  
129.763  
129.163  
127.981  
127.707

78.338  
77.479  
77.161  
76.844

30.347  
24.131  
22.830  
19.252  
13.877

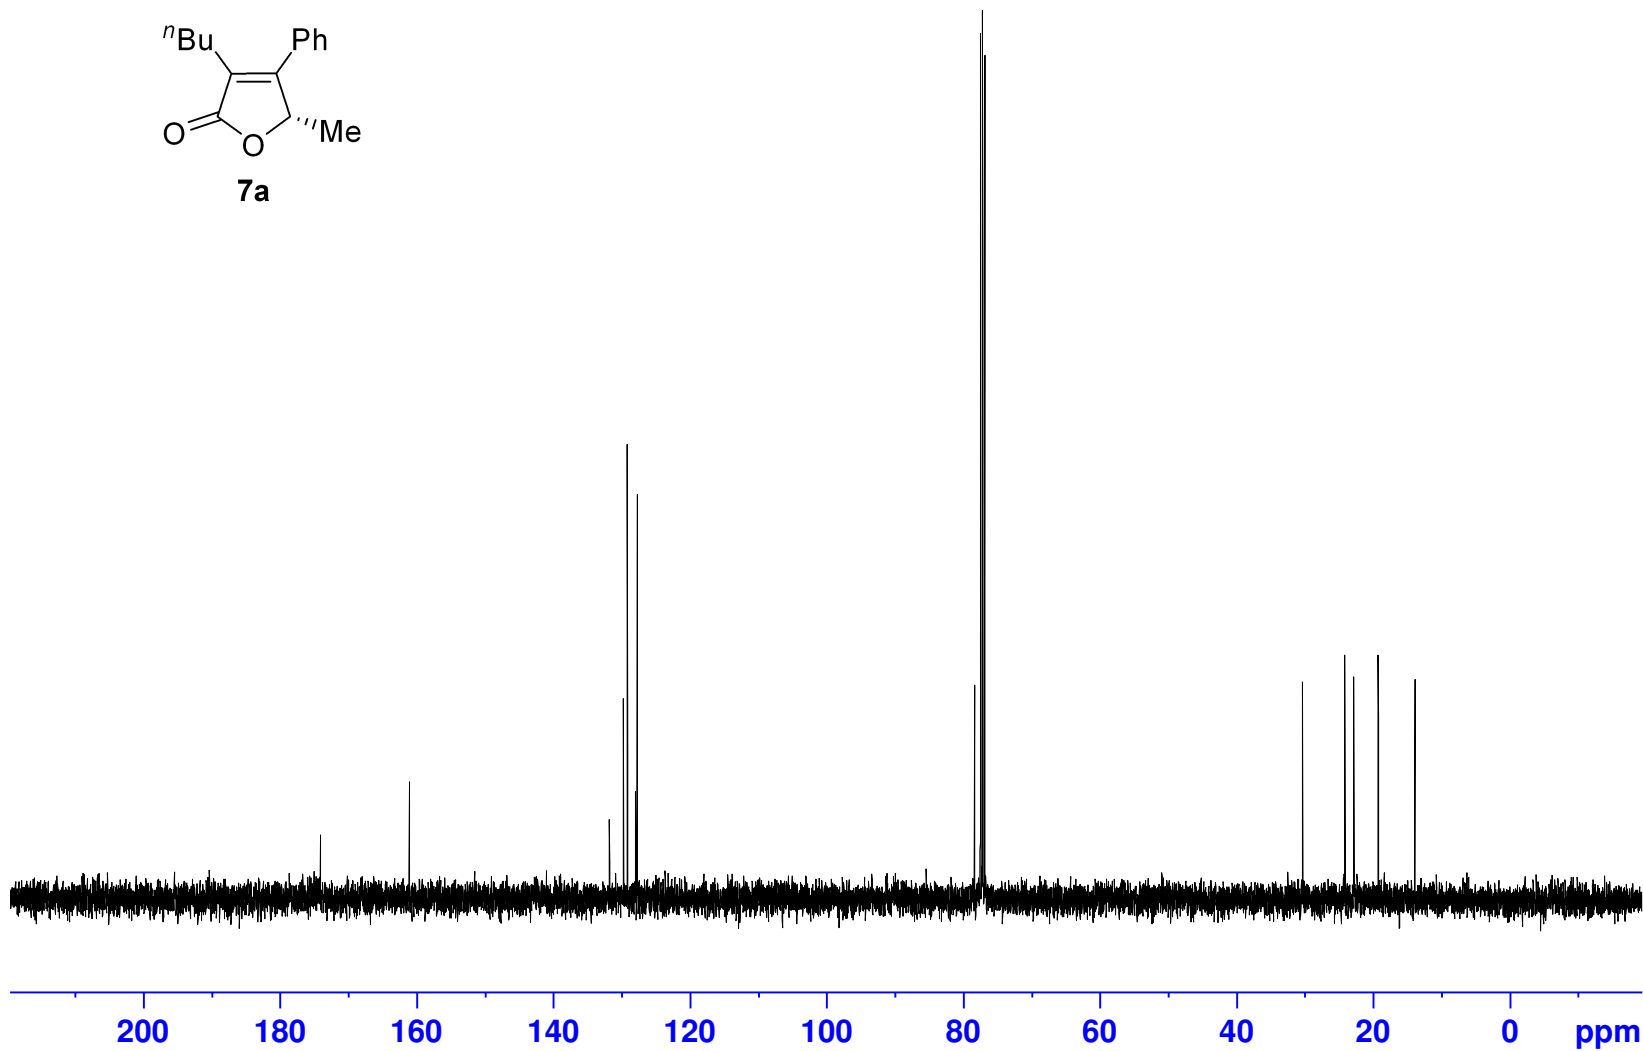

Current Data Parameters  
NAME qh-11273  
EXPNO 2  
PROCNO 1

F2 - Acquisition Parameters  
Date\_ 20150416  
Time 13.30  
INSTRUM spect  
PROBHD 5 mm PABBO BB/  
PULPROG zgpg30  
TD 65536  
SOLVENT CDC13  
NS 14  
DS 2  
SWH 24038.461 Hz  
FIDRES 0.366798 Hz  
AQ 1.3631488 sec  
RG 196.92  
DW 20.800 usec  
DE 6.50 usec  
TE 296.7 K  
D1 2.00000000 sec  
D11 0.03000000 sec  
TD0 1

==== CHANNEL f1 =====  
SFO1 100.6228298 MHz  
NUC1 13C  
P1 9.70 usec  
PLW1 46.98899841 W

==== CHANNEL f2 =====  
SFO2 400.1316005 MHz  
NUC2 1H  
CPDPRG[2] waltz16  
PCPD2 90.00 usec  
PLW2 11.99499989 W  
PLW12 0.34213999 W  
PLW13 0.27713001 W

F2 - Processing parameters  
SI 32768  
SF 100.6127575 MHz  
WDW EM  
SSB 0  
LB 1.00 Hz  
GB 0  
PC 1.40

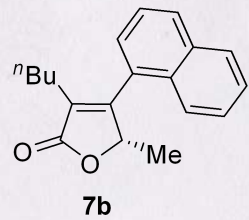

7.956  
7.935  
7.902  
7.886  
7.792  
7.583  
7.576  
7.566  
7.426  
7.405  
7.260

5.515  
5.499  
5.482

2.505  
2.489  
1.671  
1.657  
1.639  
1.618  
1.597  
1.578  
1.558  
1.393  
1.377  
1.360  
1.342  
1.326  
1.052  
0.909  
0.891  
0.873

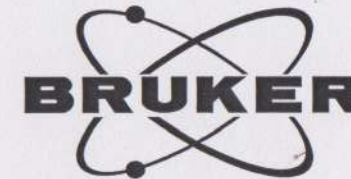

Current Data Parameters  
NAME qh-11264-1  
EXPNO 1  
PROCNO 1

F2 - Acquisition Parameters  
Date\_ 20150411  
Time 14.52  
INSTRUM spect  
PROBHD 5 mm PABBO BB-  
PULPROG zg30  
TD 65536  
SOLVENT CDCl3  
NS 4  
DS 0  
SWH 8223.685 Hz  
FIDRES 0.125483 Hz  
AQ 3.9846387 sec  
RG 203  
DW 60.800 usec  
DE 6.00 usec  
TE 293.3 K  
D1 1.00000000 sec  
TD0 1

===== CHANNEL f1 =====  
NUC1 1H  
P1 13.60 usec  
PL1 -1.00 dB  
SFO1 400.1324710 MHz

F2 - Processing parameters  
SI 32768  
SF 400.1300051 MHz  
WDW EM  
SSB 0  
LB 0.30 Hz  
GB 0  
PC 1.00

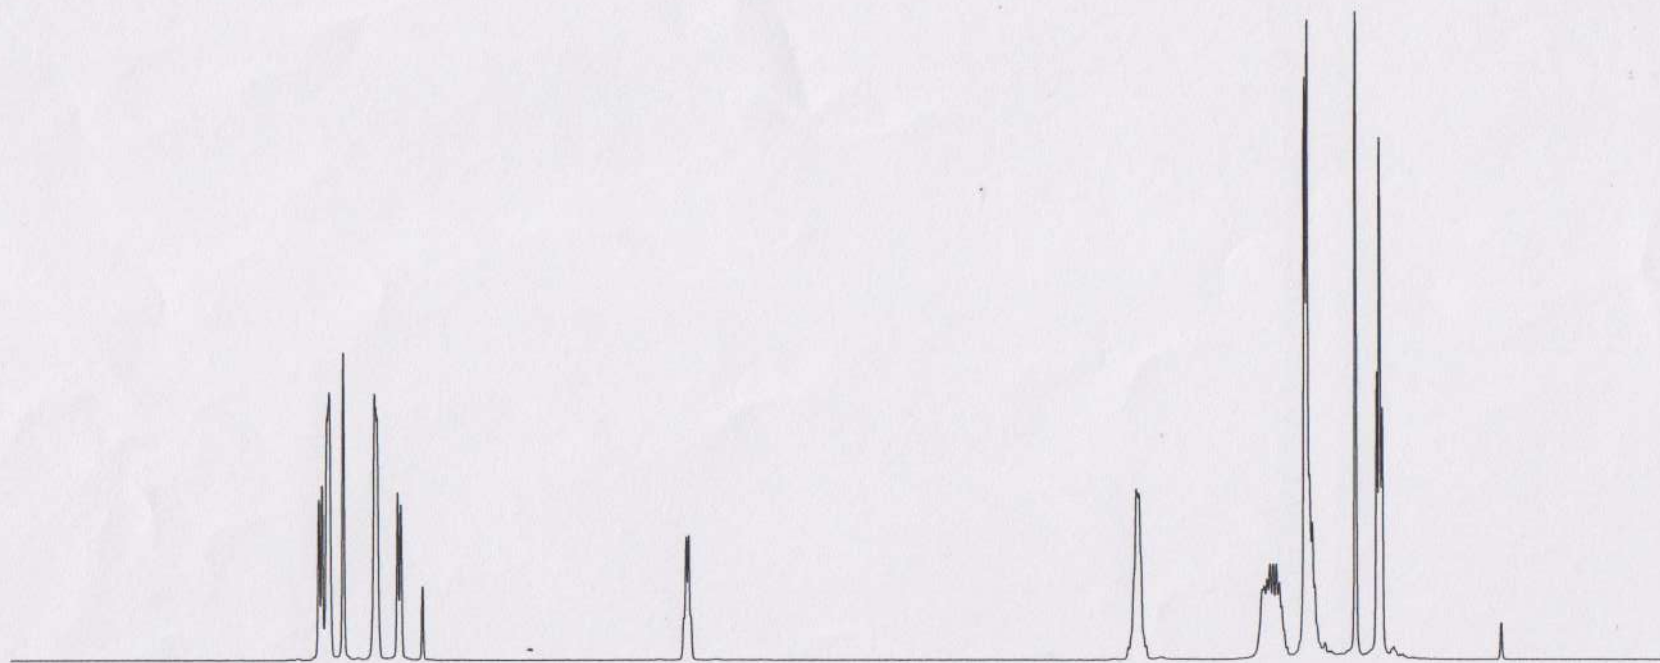

9.5 9.0 8.5 8.0 7.5 7.0 6.5 6.0 5.5 5.0 4.5 4.0 3.5 3.0 2.5 2.0 1.5 1.0 0.5 0.0 ppm

3.04  
1.07  
2.04  
1.06

1.00

2.05

2.65  
5.26  
2.10  
3.24



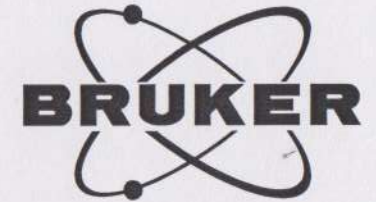

Current Data Parameters  
NAME qh-11264-1  
EXPNO 2  
PROCNO 1

F2 - Acquisition Parameters  
Date\_ 20150411  
Time 14.57  
INSTRUM spect  
PROBHD 5 mm PABBO BB-  
PULPROG zgpg30  
TD 65536  
SOLVENT CDCl3  
NS 70  
DS 2  
SWH 24038.461 Hz  
FIDRES 0.366798 Hz  
AQ 1.3631988 sec  
RG 2050  
DW 20.800 usec  
DE 6.00 usec  
TE 294.1 K  
D1 2.00000000 sec  
d11 0.03000000 sec  
DELTA 1.89999998 sec  
TD0 1

===== CHANNEL f1 =====  
NUC1 13C  
P1 9.25 usec  
PL1 -3.00 dB  
SFO1 100.6228298 MHz

===== CHANNEL f2 =====  
CPDPRG2 waltz16  
NUC2 1H  
PCPD2 80.00 usec  
PL12 12.45 dB  
PL13 18.00 dB  
PL2 -1.00 dB  
SFO2 400.1316005 MHz

F2 - Processing parameters  
SI 32768  
SF 100.6127575 MHz  
WDW EM  
SSB 0  
LB 1.00 Hz  
GB 0  
PC 1.40

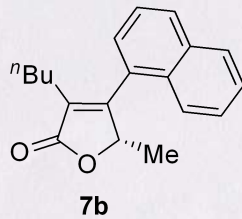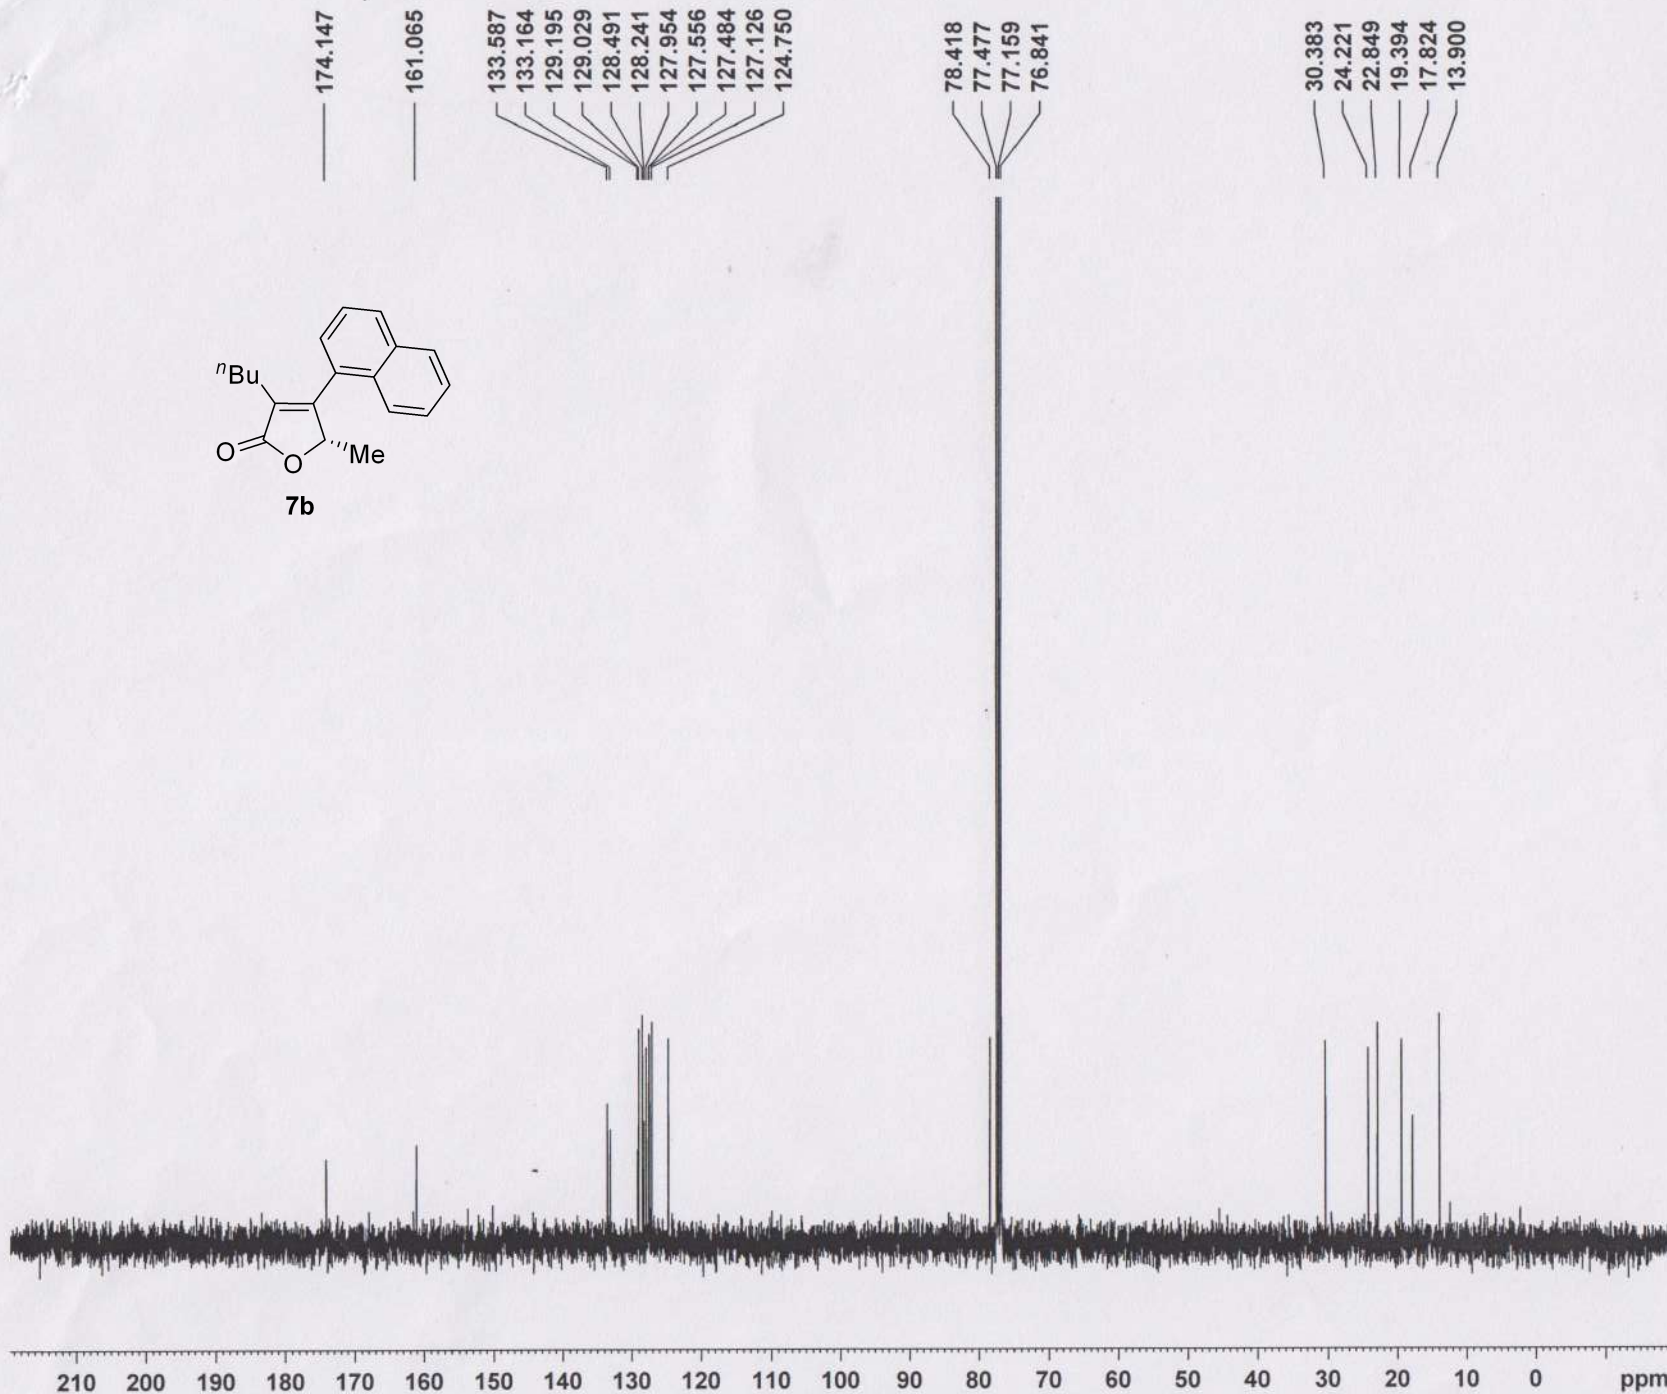



7.319  
7.305  
7.297  
7.284  
7.260  
7.191  
7.170  
7.148  
5.345  
5.328  
5.311  
5.295  
2.431  
2.413  
2.391  
2.375  
2.352  
2.342  
2.333  
2.318  
1.614  
1.597  
1.592  
1.582  
1.575  
1.568  
1.559  
1.552  
1.544  
1.536  
1.514  
1.509  
1.493  
1.477  
1.455  
1.444  
1.438  
1.373  
1.355  
1.338  
1.322  
1.309  
1.305  
1.289  
1.271  
0.889  
0.871  
0.852

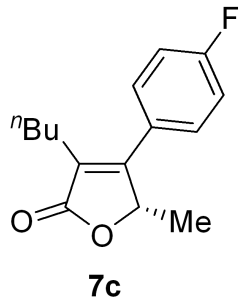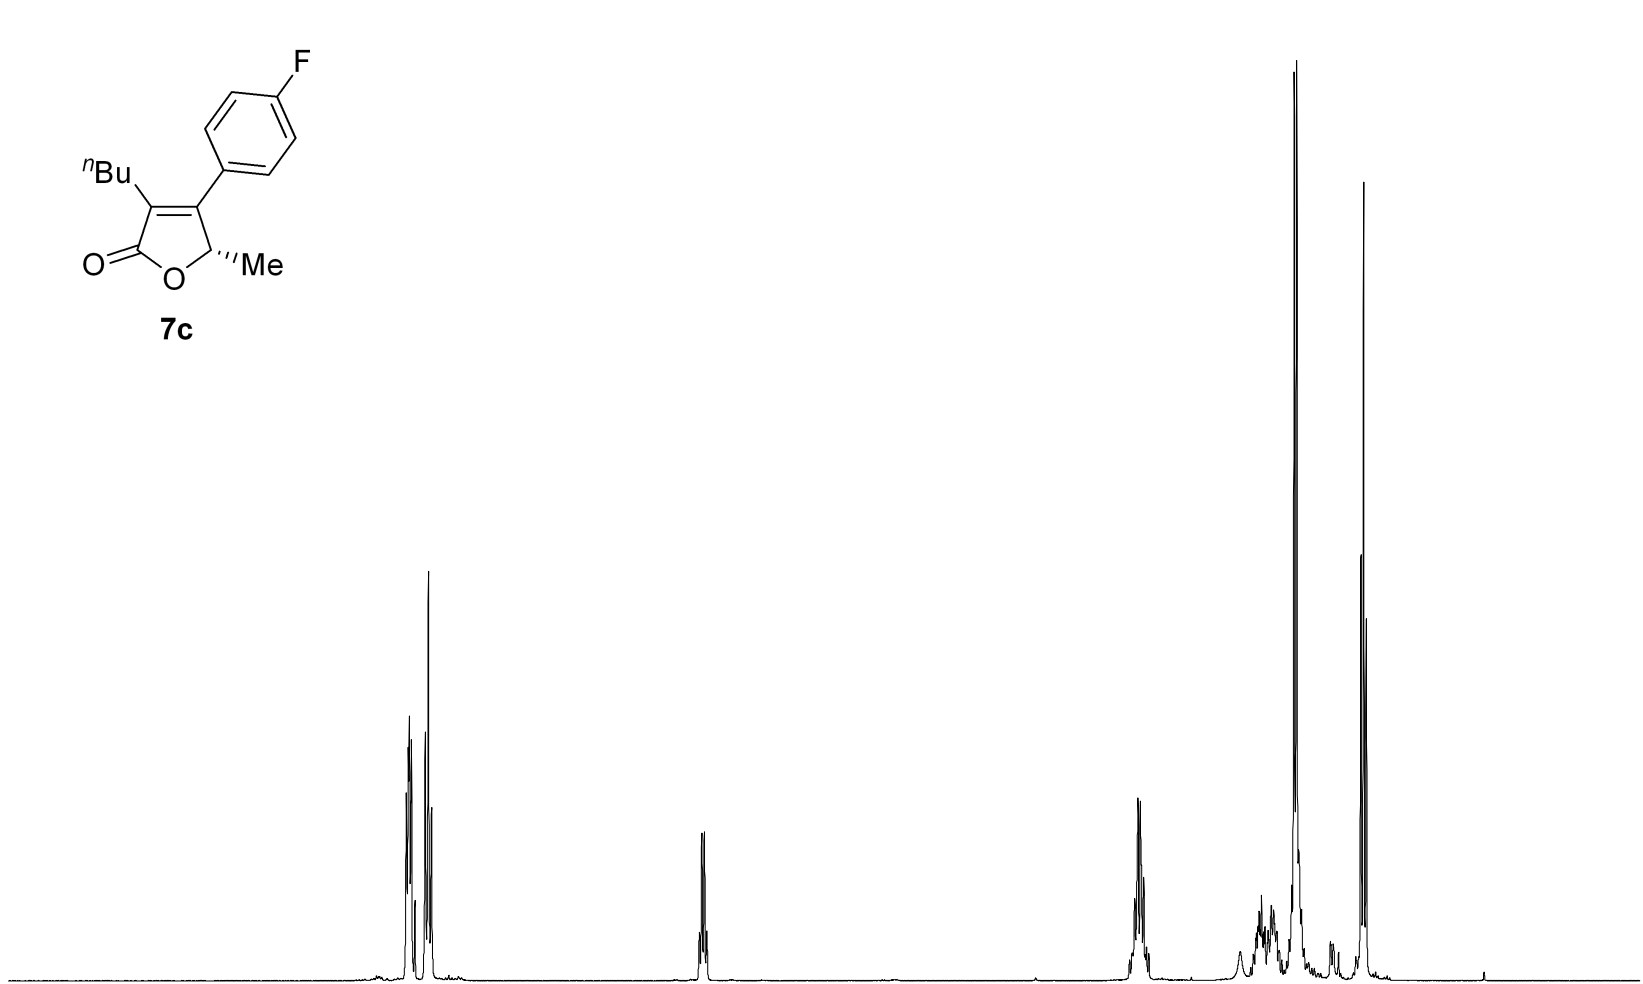

Current Data Parameters  
NAME qh-11278-1  
EXPNO 1  
PROCNO 1

F2 - Acquisition Parameters  
Date\_ 20150417  
Time 12.24  
INSTRUM spect  
PROBHD 5 mm PABBO BB/  
PULPROG zg30  
TD 65536  
SOLVENT CDC13  
NS 2  
DS 0  
SWH 8012.820 Hz  
FIDRES 0.122266 Hz  
AQ 4.0894465 sec  
RG 49.32  
DW 62.400 usec  
DE 6.50 usec  
TE 296.3 K  
D1 1.00000000 sec  
TD0 1

==== CHANNEL f1 =====  
SFO1 400.1324710 MHz  
NUC1 1H  
P1 14.50 usec  
PLW1 11.99499989 W

F2 - Processing parameters  
SI 65536  
SF 400.1300089 MHz  
WDW EM  
SSB 0  
LB 0.30 Hz  
GB 0  
PC 1.00

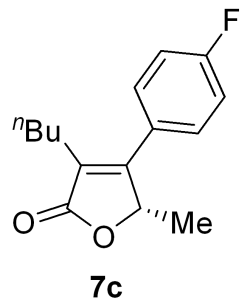

— 173.855  
— 164.642  
— 162.148  
— 159.881

— 129.709  
— 129.627  
— 128.076  
— 127.869  
— 127.834  
— 116.540  
— 116.322

— 78.234  
— 77.478  
— 77.160  
— 76.842

— 30.269  
— 24.101  
— 22.806  
— 19.245  
— 13.845

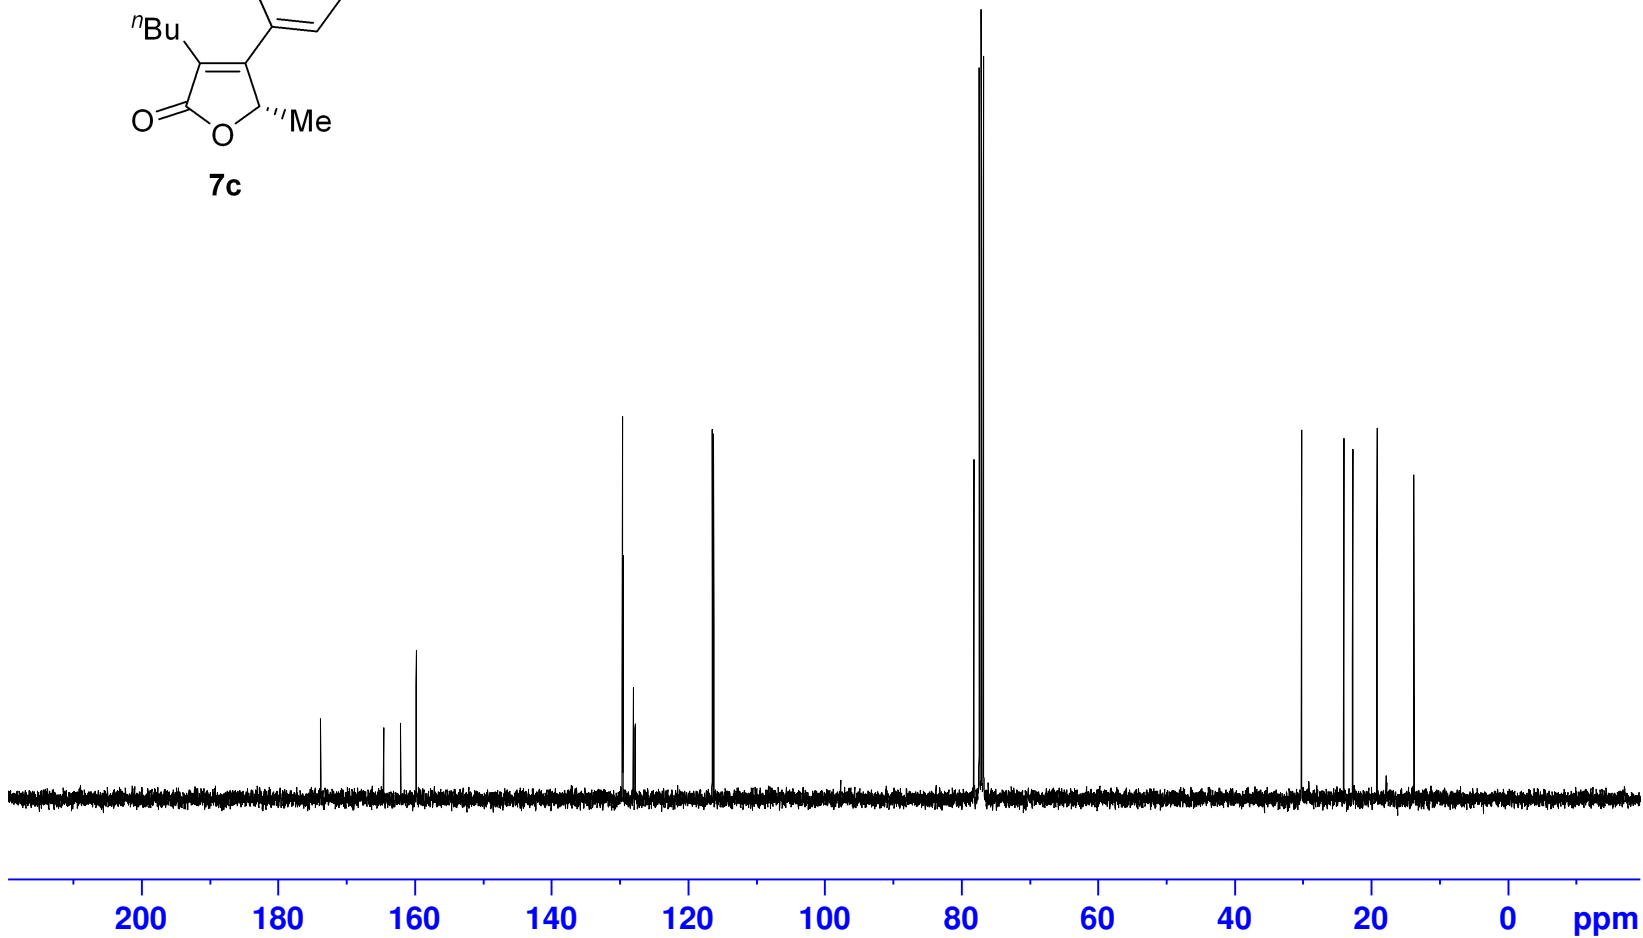

Current Data Parameters  
NAME qh-11278-1  
EXPNO 2  
PROCNO 1

F2 - Acquisition Parameters  
Date\_ 20150417  
Time 12.28  
INSTRUM spect  
PROBHD 5 mm PABBO BB/  
PULPROG zgpg30  
TD 65536  
SOLVENT CDC13  
NS 80  
DS 2  
SWH 24038.461 Hz  
FIDRES 0.366798 Hz  
AQ 1.3631488 sec  
RG 196.92  
DW 20.800 usec  
DE 6.50 usec  
TE 297.3 K  
D1 2.00000000 sec  
D11 0.03000000 sec  
TD0 1

==== CHANNEL f1 =====  
SFO1 100.6228298 MHz  
NUC1 13C  
P1 9.70 usec  
PLW1 46.98899841 W

==== CHANNEL f2 =====  
SFO2 400.1316005 MHz  
NUC2 1H  
CPDPRG[2] waltz16  
PCPD2 90.00 usec  
PLW2 11.99499989 W  
PLW12 0.34213999 W  
PLW13 0.27713001 W

F2 - Processing parameters  
SI 32768  
SF 100.6127575 MHz  
WDW EM  
SSB 0  
LB 1.00 Hz  
GB 0  
PC 1.40

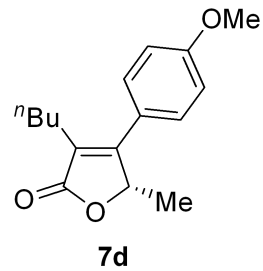

7.304  
7.282  
7.017  
6.995  
5.379  
5.362  
5.345  
5.329  
3.873  
2.501  
2.485  
2.467  
2.443  
2.427  
2.418  
2.403  
2.394  
2.384  
2.370  
1.656  
1.650  
1.639  
1.634  
1.624  
1.617  
1.610  
1.601  
1.594  
1.586  
1.578  
1.562  
1.544  
1.523  
1.507  
1.485  
1.474  
1.469

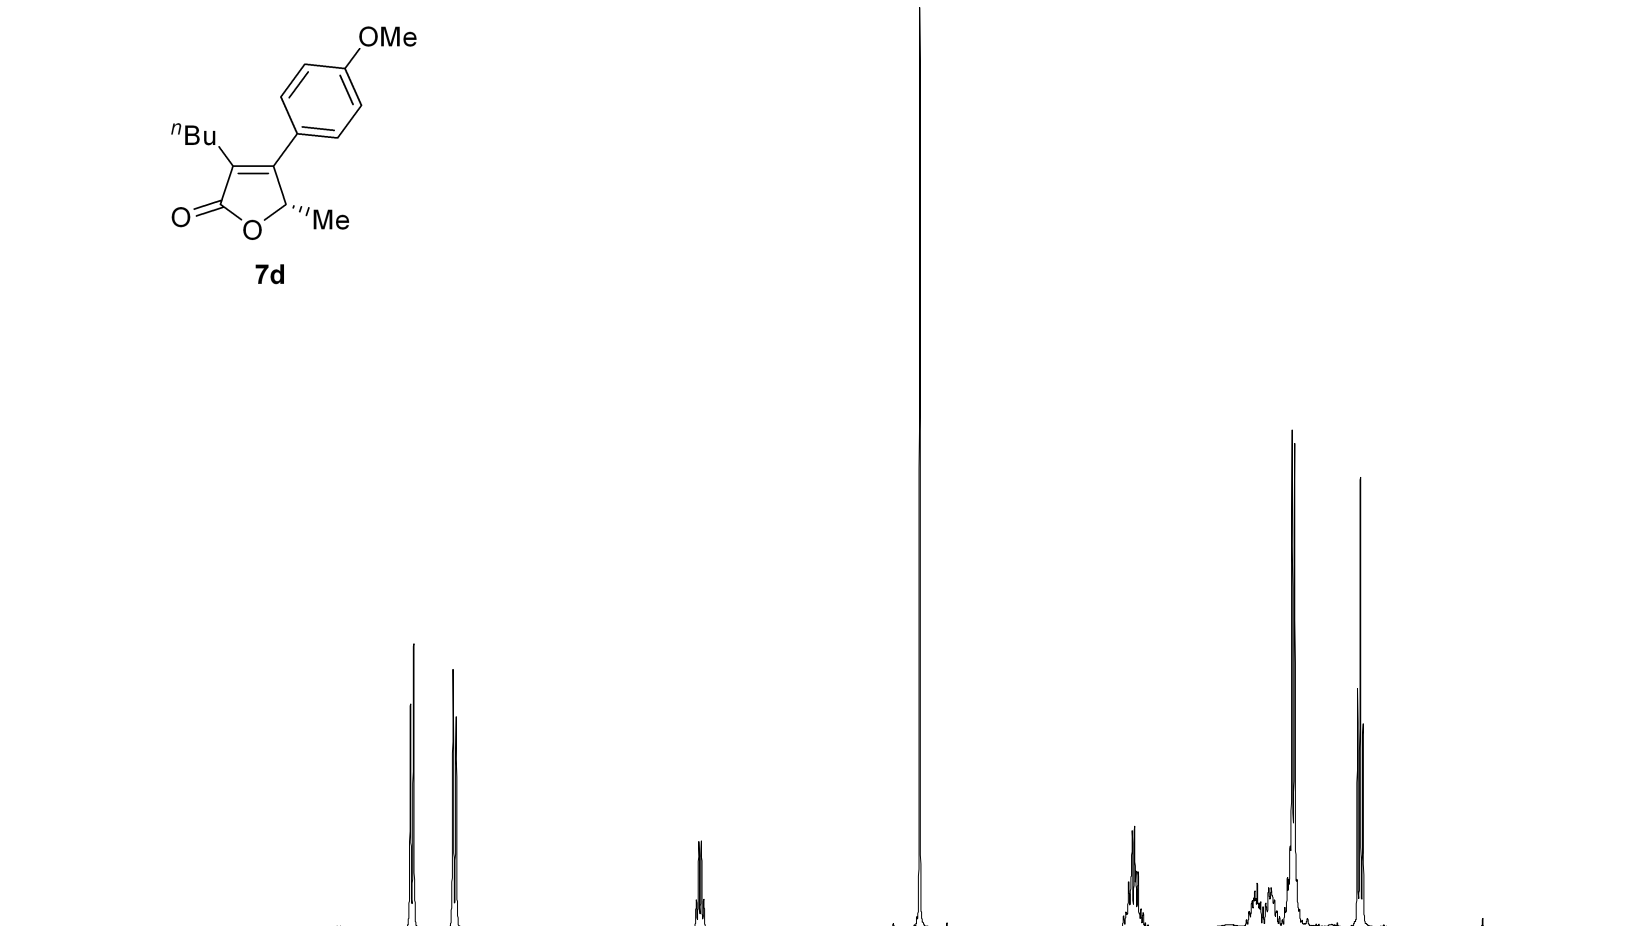

Current Data Parameters  
NAME qh-11278-2  
EXPNO 1  
PROCNO 1

F2 - Acquisition Parameters  
Date\_ 20150417  
Time 12.32  
INSTRUM spect  
PROBHD 5 mm PABBO BB/  
PULPROG zg30  
TD 65536  
SOLVENT CDC13  
NS 2  
DS 0  
SWH 8012.820 Hz  
FIDRES 0.122266 Hz  
AQ 4.0894465 sec  
RG 45.67  
DW 62.400 usec  
DE 6.50 usec  
TE 296.5 K  
D1 1.00000000 sec  
TD0 1

==== CHANNEL f1 =====  
SFO1 400.1324710 MHz  
NUC1 1H  
P1 14.50 usec  
PLW1 11.99499989 W

F2 - Processing parameters  
SI 65536  
SF 400.1300000 MHz  
WDW EM  
SSB 0  
LB 0.30 Hz  
GB 0  
PC 1.00

2.12  
2.02

1.00

3.08

2.08

1.07

1.16

5.24

3.25

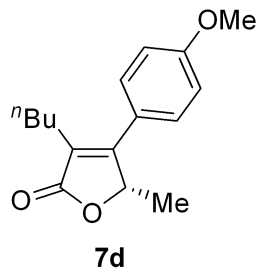

— 174.392

< 160.747  
< 160.547

< 129.246  
< 126.267  
< 124.005  
— 114.595

< 78.057  
< 77.479  
< 77.161  
< 76.844

— 55.483

< 30.324  
< 24.204  
< 22.862  
< 19.529  
< 13.896

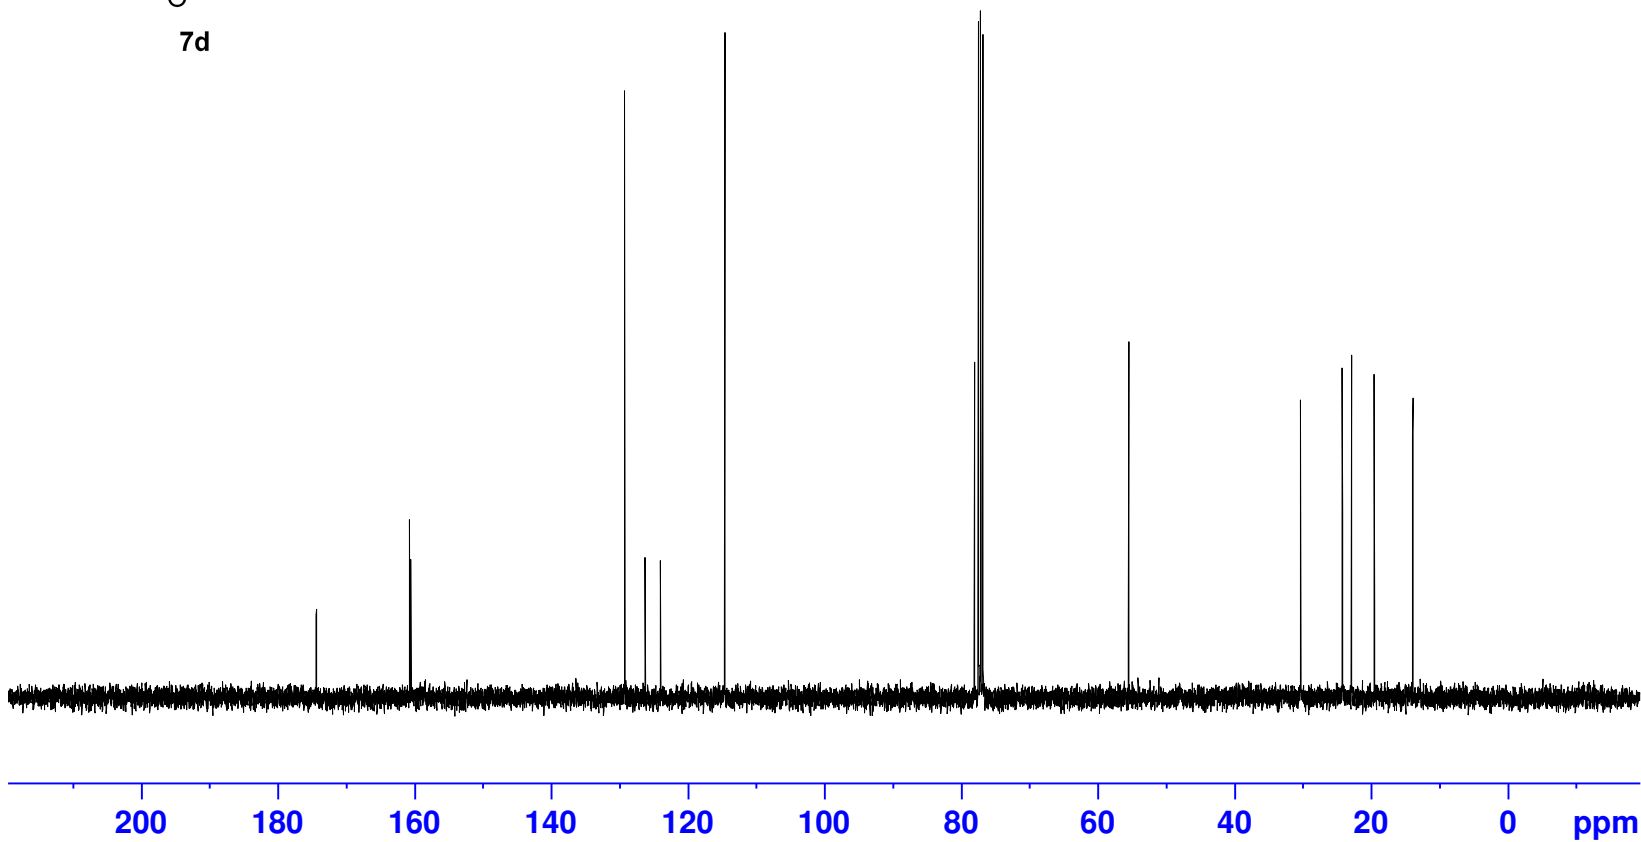

Current Data Parameters  
NAME qh-11278-2  
EXPNO 2  
PROCNO 1

F2 - Acquisition Parameters  
Date\_ 20150417  
Time 12.34  
INSTRUM spect  
PROBHD 5 mm PABBO BB/  
PULPROG zgpg30  
TD 65536  
SOLVENT CDC13  
NS 30  
DS 2  
SWH 24038.461 Hz  
FIDRES 0.366798 Hz  
AQ 1.3631488 sec  
RG 196.92  
DW 20.800 usec  
DE 6.50 usec  
TE 297.2 K  
D1 2.00000000 sec  
D11 0.03000000 sec  
TD0 1

==== CHANNEL f1 =====  
SFO1 100.6228298 MHz  
NUC1 13C  
P1 9.70 usec  
PLW1 46.98899841 W

==== CHANNEL f2 =====  
SFO2 400.1316005 MHz  
NUC2 1H  
CPDPRG[2] waltz16  
PCPD2 90.00 usec  
PLW2 11.99499989 W  
PLW12 0.34213999 W  
PLW13 0.27713001 W

F2 - Processing parameters  
SI 32768  
SF 100.6127590 MHz  
WDW EM  
SSB 0  
LB 1.00 Hz  
GB 0  
PC 1.40



7.313  
7.294  
7.275  
7.260  
7.210  
7.191  
4.715  
4.694  
2.802  
2.780  
2.768  
2.756  
2.748  
2.729  
2.713  
2.261  
2.243  
2.224  
2.206  
2.188  
2.179  
2.170  
2.158  
2.153  
2.135  
2.128  
1.911  
1.766  
1.745  
1.730  
1.721  
1.709  
1.695  
1.687  
1.508  
1.491  
1.471  
1.452  
1.432  
1.355  
1.337  
1.318  
1.300  
1.281  
1.263  
0.926  
0.907  
0.889

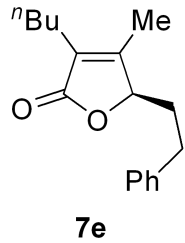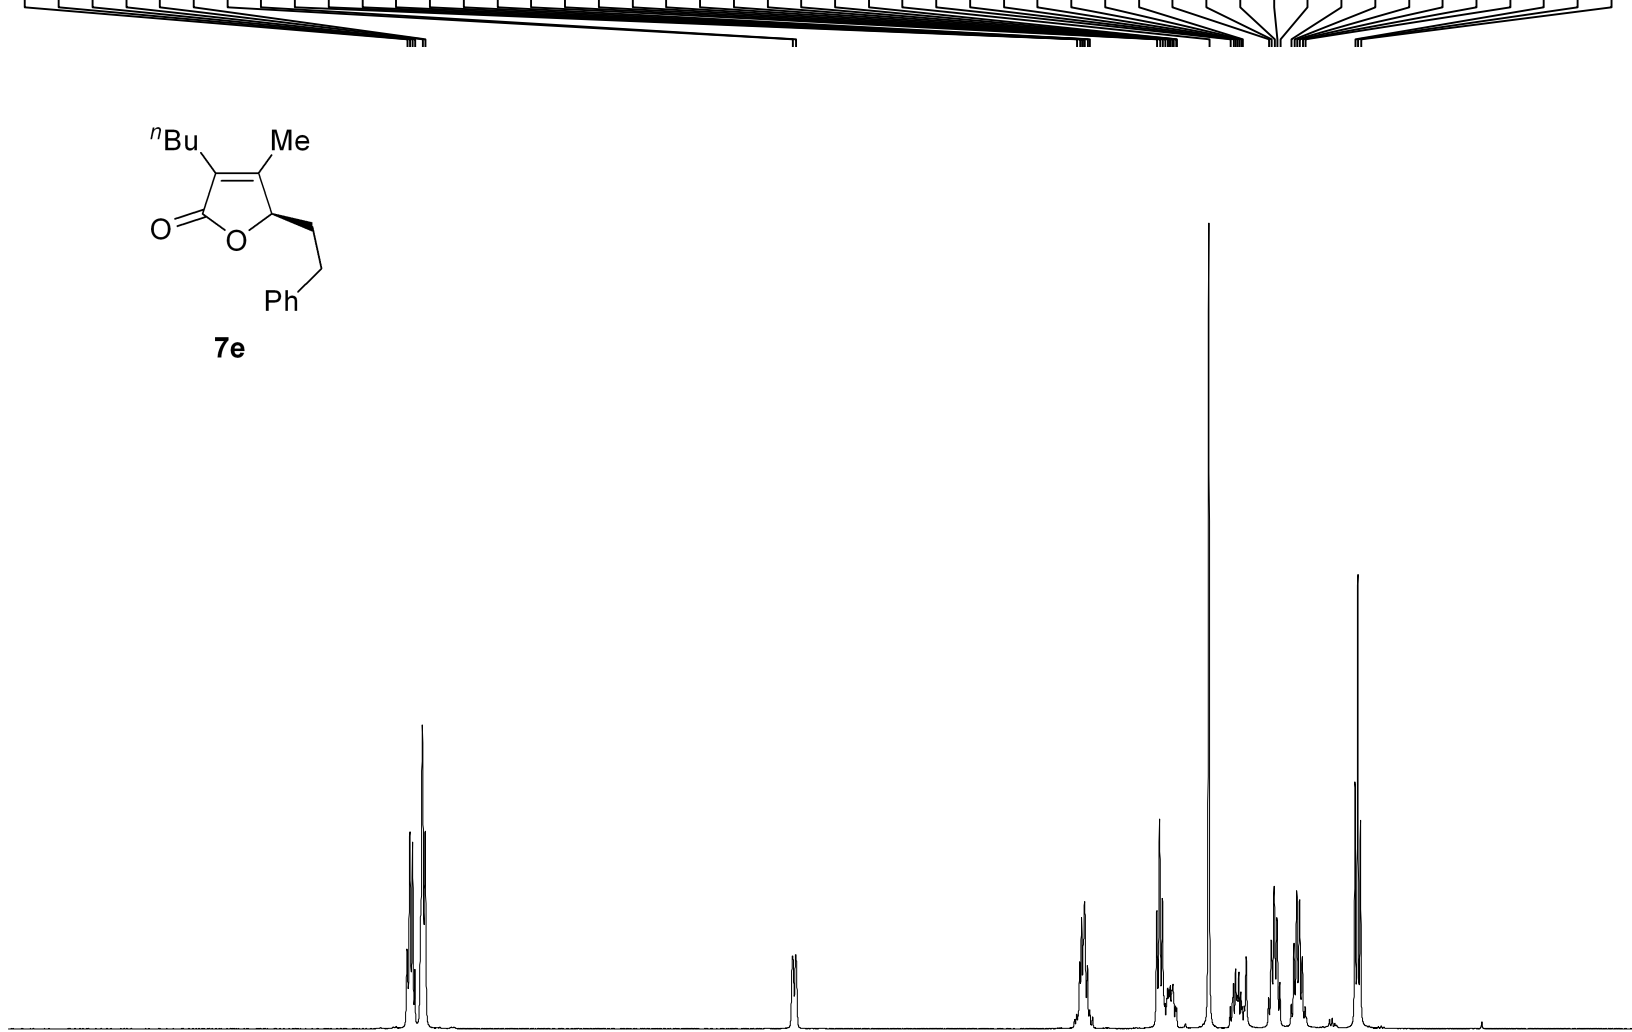

Current Data Parameters  
NAME qh-11286-2  
EXPNO 3  
PROCNO 1

F2 - Acquisition Parameters  
Date\_ 20150423  
Time 14.41  
INSTRUM spect  
PROBHD 5 mm PABBO BB/  
PULPROG zg30  
TD 65536  
SOLVENT CDC13  
NS 2  
DS 0  
SWH 8012.820 Hz  
FIDRES 0.122266 Hz  
AQ 4.0894465 sec  
RG 49.32  
DW 62.400 usec  
DE 6.50 usec  
TE 296.2 K  
D1 1.00000000 sec  
TD0 1

==== CHANNEL f1 =====  
SF01 400.1324710 MHz  
NUC1 1H  
P1 14.50 usec  
PLW1 11.99499989 W

F2 - Processing parameters  
SI 65536  
SF 400.1300093 MHz  
WDW EM  
SSB 0  
LB 0.30 Hz  
GB 0  
PC 1.00

2.03  
3.02

1.00

2.04  
2.09  
0.98  
3.04  
1.02  
2.06  
2.17  
3.10

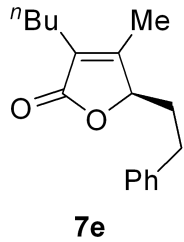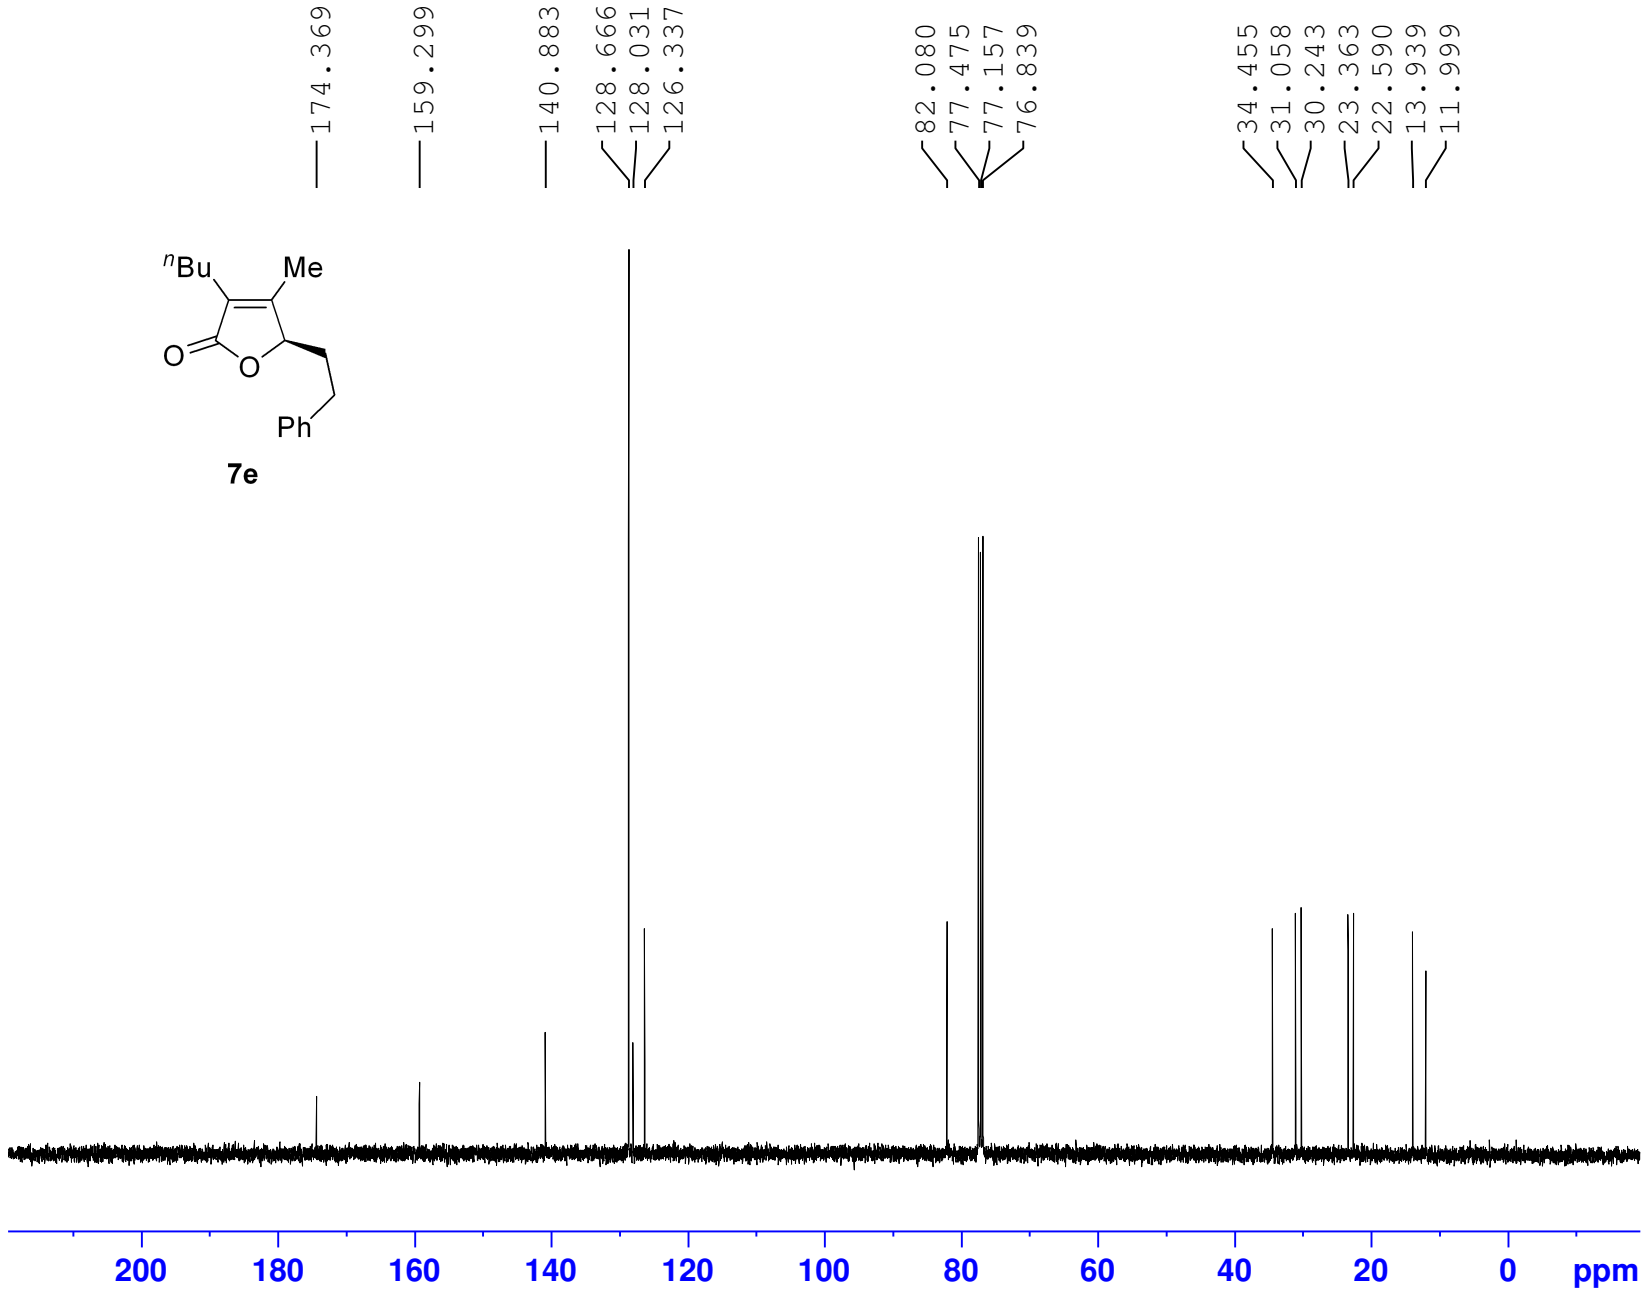

Current Data Parameters  
NAME qh-11286-2  
EXPNO 4  
PROCNO 1

F2 - Acquisition Parameters  
Date\_ 20150423  
Time 14.44  
INSTRUM spect  
PROBHD 5 mm PABBO BB/  
PULPROG zgpg30  
TD 65536  
SOLVENT CDC13  
NS 60  
DS 2  
SWH 24038.461 Hz  
FIDRES 0.366798 Hz  
AQ 1.3631488 sec  
RG 196.92  
DW 20.800 usec  
DE 6.50 usec  
TE 297.0 K  
D1 2.00000000 sec  
D11 0.03000000 sec  
TD0 1

==== CHANNEL f1 =====  
SFO1 100.6228298 MHz  
NUC1 13C  
P1 9.70 usec  
PLW1 46.98899841 W

==== CHANNEL f2 =====  
SFO2 400.1316005 MHz  
NUC2 1H  
CPDPRG[2] waltz16  
PCPD2 90.00 usec  
PLW2 11.99499989 W  
PLW12 0.34213999 W  
PLW13 0.27713001 W

F2 - Processing parameters  
SI 32768  
SF 100.6127589 MHz  
WDW EM  
SSB 0  
LB 1.00 Hz  
GB 0  
PC 1.40



7.463  
7.451  
7.436  
7.260  
7.241  
7.222  
7.184  
7.166  
7.149  
7.101  
7.082  
5.281  
5.263  
2.761  
2.747  
2.737  
2.726  
2.706  
2.446  
2.429  
2.412  
2.406  
2.390  
2.070  
2.062  
2.053  
2.039  
2.035  
1.720  
1.706  
1.697  
1.684  
1.671  
1.662  
1.610  
1.603  
1.596  
1.587  
1.518  
1.501  
1.368  
1.351  
1.334  
1.316  
1.300  
0.896  
0.878  
0.859

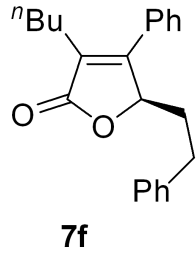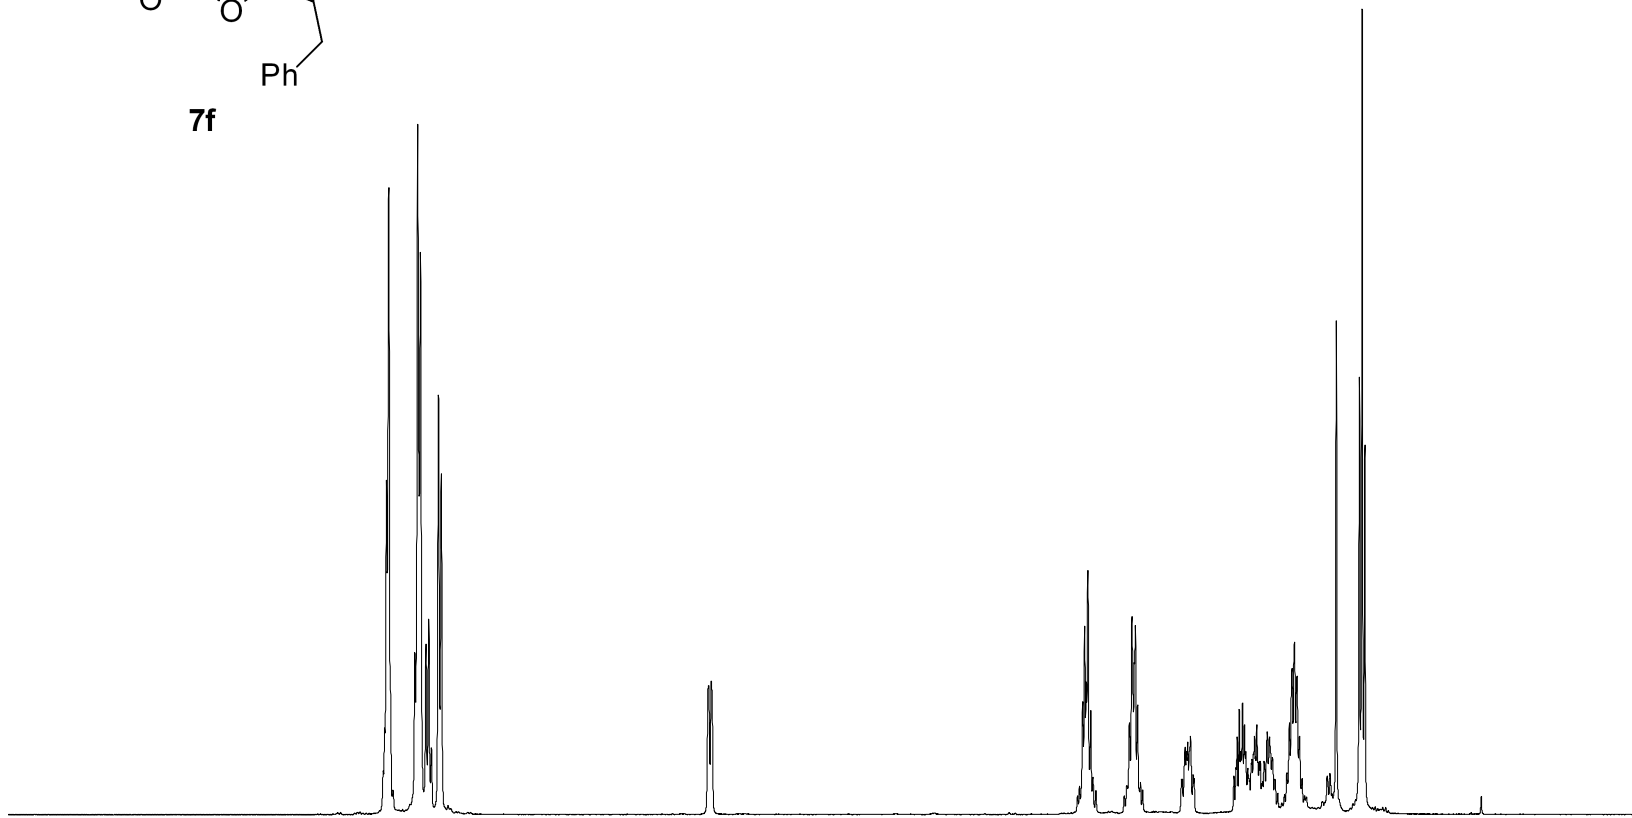

Current Data Parameters  
NAME qh-11286-3  
EXPNO 3  
PROCNO 1

F2 - Acquisition Parameters  
Date\_ 20150423  
Time 14.47  
INSTRUM spect  
PROBHD 5 mm PABBO BB/  
PULPROG zg30  
TD 65536  
SOLVENT CDC13  
NS 2  
DS 0  
SWH 8012.820 Hz  
FIDRES 0.122266 Hz  
AQ 4.0894465 sec  
RG 39.46  
DW 62.400 usec  
DE 6.50 usec  
TE 296.4 K  
D1 1.00000000 sec  
TD0 1

==== CHANNEL f1 =====  
SFO1 400.1324710 MHz  
NUC1 1H  
P1 14.50 usec  
PLW1 11.99499989 W

F2 - Processing parameters  
SI 65536  
SF 400.1300132 MHz  
WDW EM  
SSB 0  
LB 0.30 Hz  
GB 0  
PC 1.00

9 8 7 6 5 4 3 2 1 0 ppm

3.07  
4.18  
1.11  
2.07

1.00

2.07  
2.07  
1.03  
3.43  
2.37  
3.22



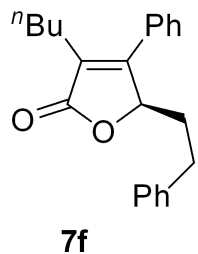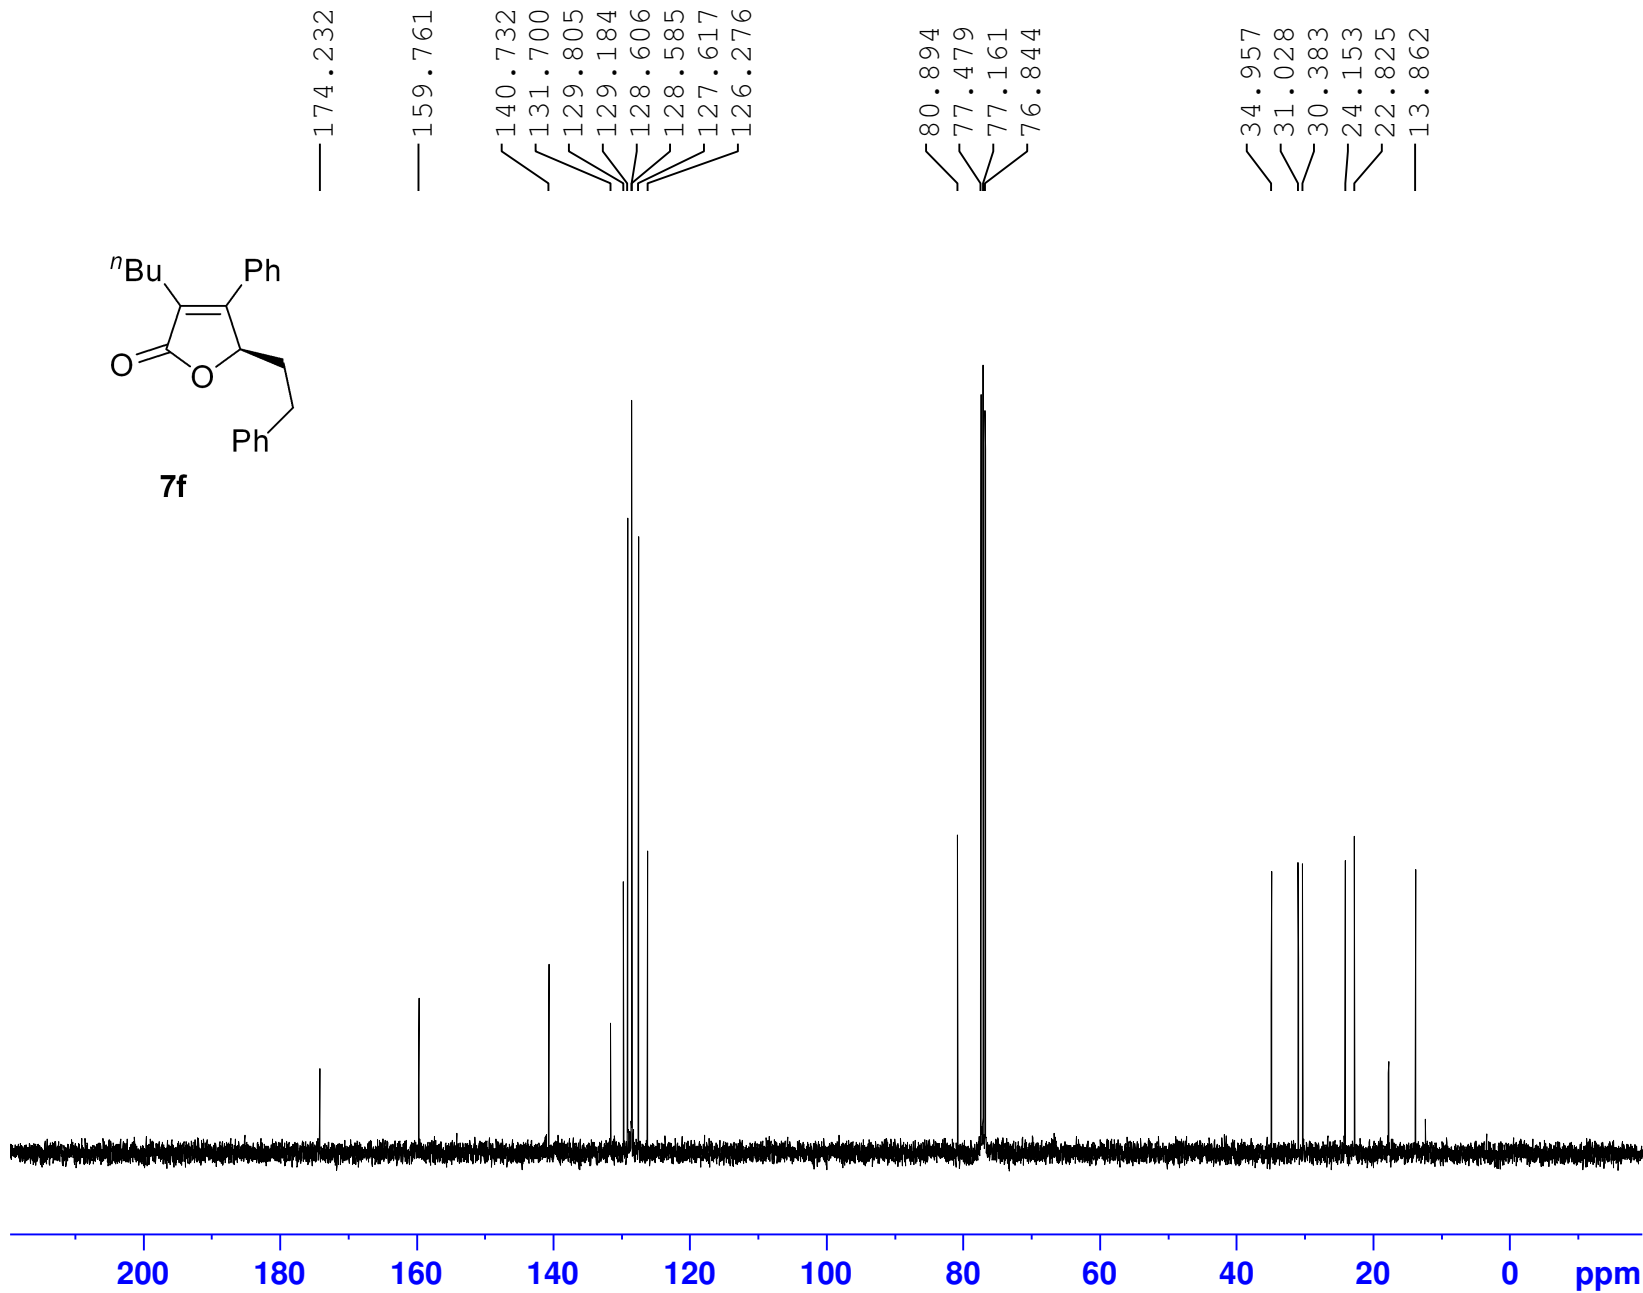

Current Data Parameters  
NAME qh-11286-3  
EXPNO 4  
PROCNO 1

F2 - Acquisition Parameters  
Date\_ 20150423  
Time 14.50  
INSTRUM spect  
PROBHD 5 mm PABBO BB/  
PULPROG zgpg30  
TD 65536  
SOLVENT CDC13  
NS 37  
DS 2  
SWH 24038.461 Hz  
FIDRES 0.366798 Hz  
AQ 1.3631488 sec  
RG 196.92  
DW 20.800 usec  
DE 6.50 usec  
TE 297.1 K  
D1 2.00000000 sec  
D11 0.03000000 sec  
TD0 1

==== CHANNEL f1 =====  
SFO1 100.6228298 MHz  
NUC1 13C  
P1 9.70 usec  
PLW1 46.98899841 W

==== CHANNEL f2 =====  
SFO2 400.1316005 MHz  
NUC2 1H  
CPDPRG[2] waltz16  
PCPD2 90.00 usec  
PLW2 11.99499989 W  
PLW12 0.34213999 W  
PLW13 0.27713001 W

F2 - Processing parameters  
SI 32768  
SF 100.6127605 MHz  
WDW EM  
SSB 0  
LB 1.00 Hz  
GB 0  
PC 1.40

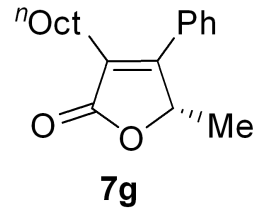

7.489  
7.473  
7.455  
7.434  
7.416  
7.312  
7.293  
7.260

5.380  
5.363  
5.346  
5.329  
2.461  
2.443  
2.427  
2.405  
2.389  
2.367  
2.357  
2.348  
2.333  
1.615  
1.602  
1.596  
1.580  
1.564  
1.558  
1.542  
1.524  
1.508  
1.490  
1.468  
1.348  
1.331  
1.301  
1.283  
1.266  
1.248

Current Data Parameters  
 NAME qh-11276-3  
 EXPNO 1  
 PROCNO 1

F2 - Acquisition Parameters  
 Date\_ 20150416  
 Time 16.27  
 INSTRUM spect  
 PROBHD 5 mm PABBO BB/  
 PULPROG zg30  
 TD 65536  
 SOLVENT CDC13  
 NS 2  
 DS 0  
 SWH 8012.820 Hz  
 FIDRES 0.122266 Hz  
 AQ 4.0894465 sec  
 RG 45.67  
 DW 62.400 usec  
 DE 6.50 usec  
 TE 296.4 K  
 D1 1.00000000 sec  
 TD0 1

==== CHANNEL f1 =====  
 SFO1 400.1324710 MHz  
 NUC1 1H  
 P1 14.50 usec  
 PLW1 11.99499989 W

F2 - Processing parameters  
 SI 65536  
 SF 400.1300092 MHz  
 WDW EM  
 SSB 0  
 LB 0.30 Hz  
 GB 0  
 PC 1.00

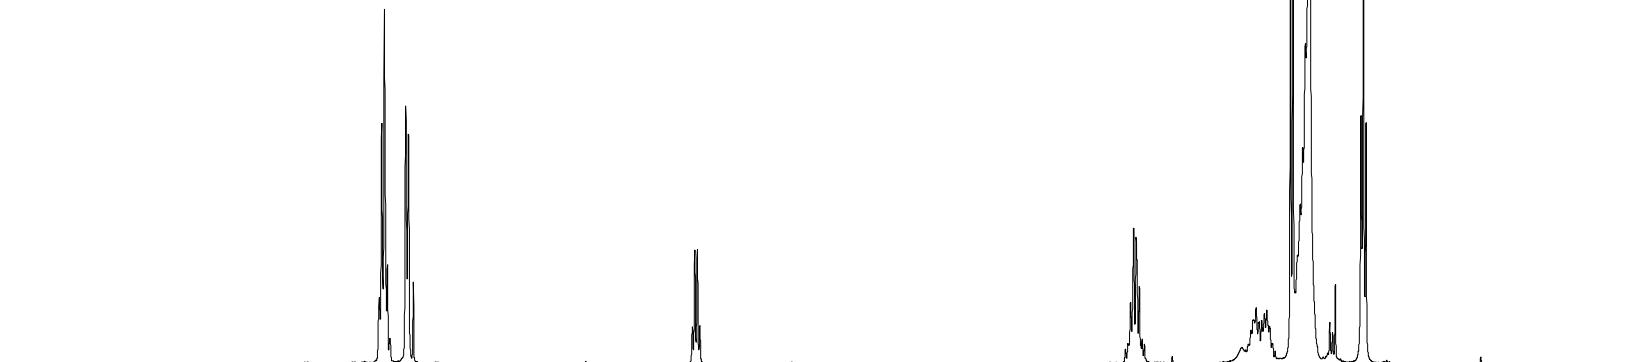

9 8 7 6 5 4 3 2 1 0 ppm

3.06  
2.03

1.00

S-138

2.06

2.18  
3.37  
10.47  
3.19



— 174.084  
— 161.036

131.809  
129.747  
129.155  
128.025  
127.703

78.328  
77.475  
77.157  
76.839

31.932  
29.680  
29.320  
29.288  
28.195  
24.345  
22.747  
19.245  
14.209

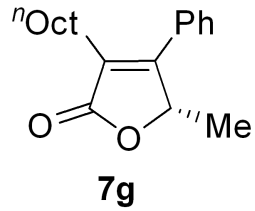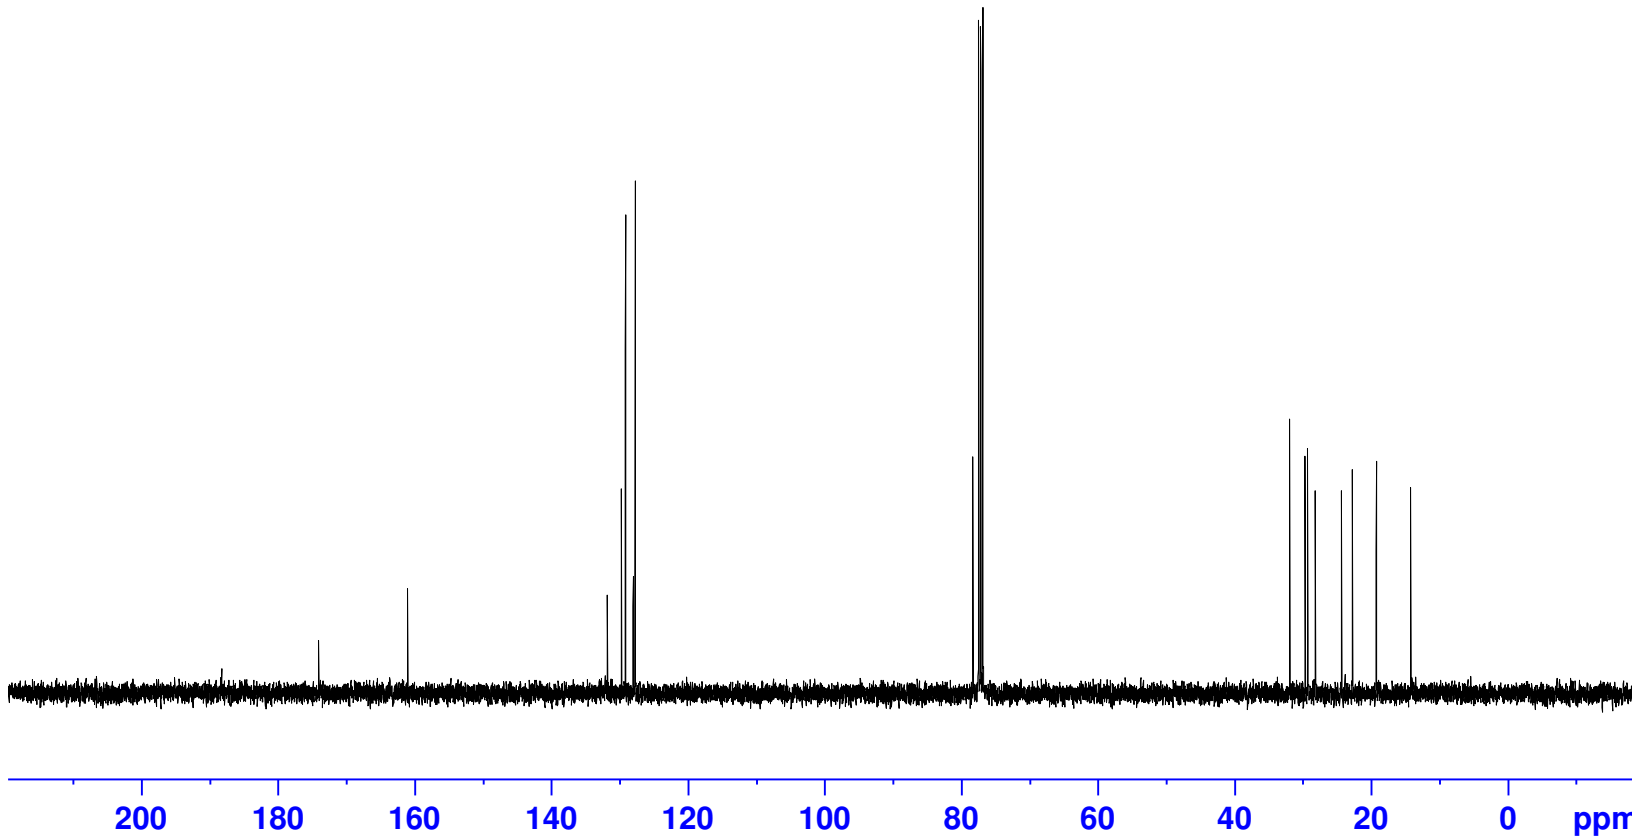

Current Data Parameters  
NAME qh-11276-3  
EXPNO 2  
PROCNO 1

F2 - Acquisition Parameters  
Date\_ 20150416  
Time 16.29  
INSTRUM spect  
PROBHD 5 mm PABBO BB/  
PULPROG zgpg30  
TD 65536  
SOLVENT CDC13  
NS 41  
DS 2  
SWH 24038.461 Hz  
FIDRES 0.366798 Hz  
AQ 1.3631488 sec  
RG 196.92  
DW 20.800 usec  
DE 6.50 usec  
TE 297.0 K  
D1 2.00000000 sec  
D11 0.03000000 sec  
TD0 1

==== CHANNEL f1 =====  
SFO1 100.6228298 MHz  
NUC1 13C  
P1 9.70 usec  
PLW1 46.98899841 W

==== CHANNEL f2 =====  
SFO2 400.1316005 MHz  
NUC2 1H  
CPDPRG[2] waltz16  
PCPD2 90.00 usec  
PLW2 11.99499989 W  
PLW12 0.34213999 W  
PLW13 0.27713001 W

F2 - Processing parameters  
SI 32768  
SF 100.6127575 MHz  
WDW EM  
SSB 0  
LB 1.00 Hz  
GB 0  
PC 1.40



7.474  
7.466  
7.453  
7.435  
7.422  
7.375  
7.370  
7.355  
7.260  
5.410  
5.393  
5.376  
5.360  
3.764  
3.752  
3.739  
3.724  
3.718  
3.704  
3.687  
3.680  
2.636  
2.624  
2.616  
2.602  
2.591  
2.577  
2.551  
2.536  
2.525  
2.512  
1.893  
1.873  
1.860  
1.847  
1.833  
1.826  
1.809  
1.800  
1.783  
1.768  
1.362  
1.345  
1.070  
1.062  
1.048  
1.027  
1.015

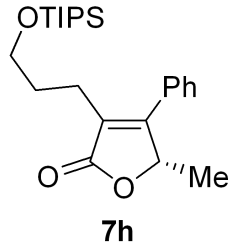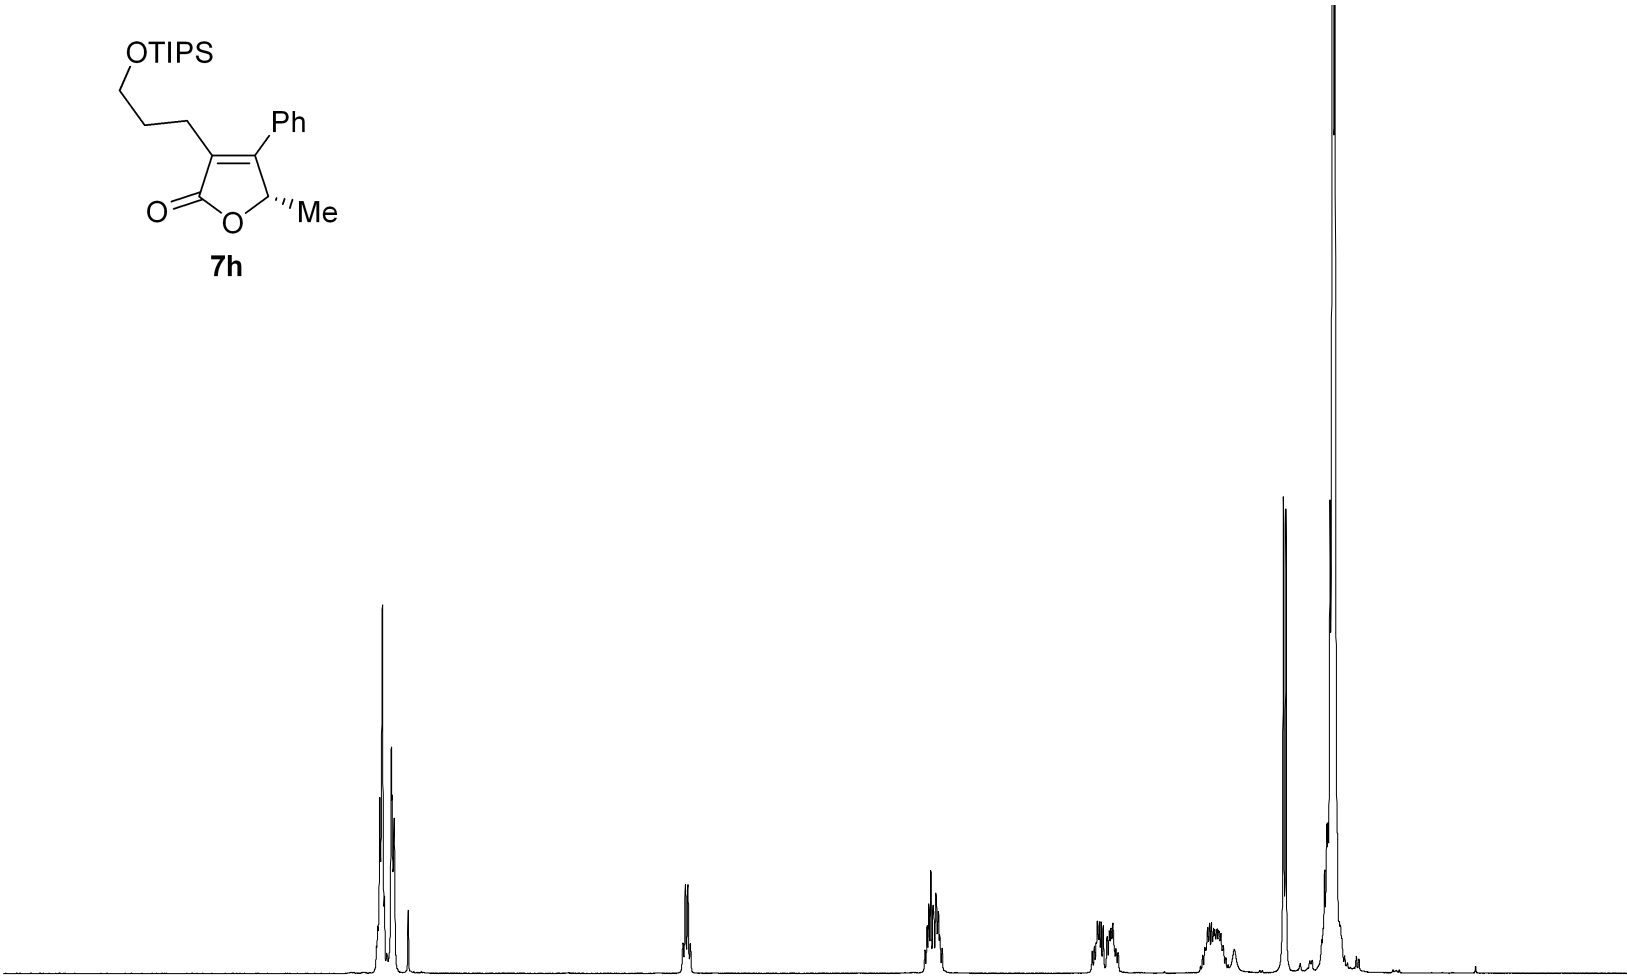

Current Data Parameters  
NAME qh-11276-5  
EXPNO 1  
PROCNO 1

F2 - Acquisition Parameters  
Date\_ 20150416  
Time 16.36  
INSTRUM spect  
PROBHD 5 mm PABBO BB/  
PULPROG zg30  
TD 65536  
SOLVENT CDC13  
NS 2  
DS 0  
SWH 8012.820 Hz  
FIDRES 0.122266 Hz  
AQ 4.0894465 sec  
RG 34.77  
DW 62.400 usec  
DE 6.50 usec  
TE 296.3 K  
D1 1.00000000 sec  
TD0 1

==== CHANNEL f1 =====  
SFO1 400.1324710 MHz  
NUC1 1H  
P1 14.50 usec  
PLW1 11.99499989 W

F2 - Processing parameters  
SI 65536  
SF 400.1300088 MHz  
WDW EM  
SSB 0  
LB 0.30 Hz  
GB 0  
PC 1.00

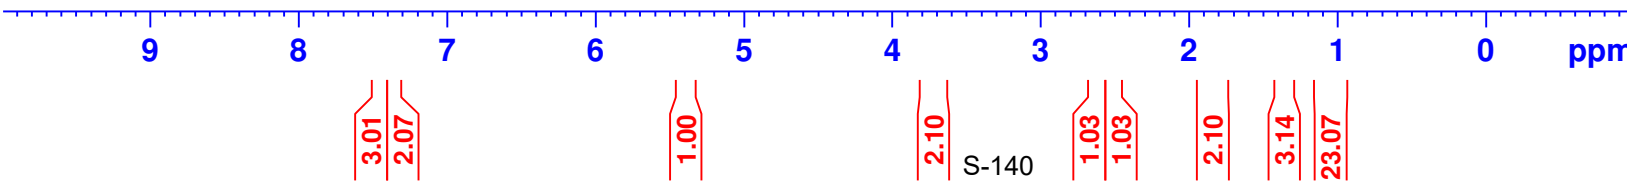

S-140

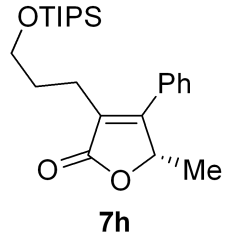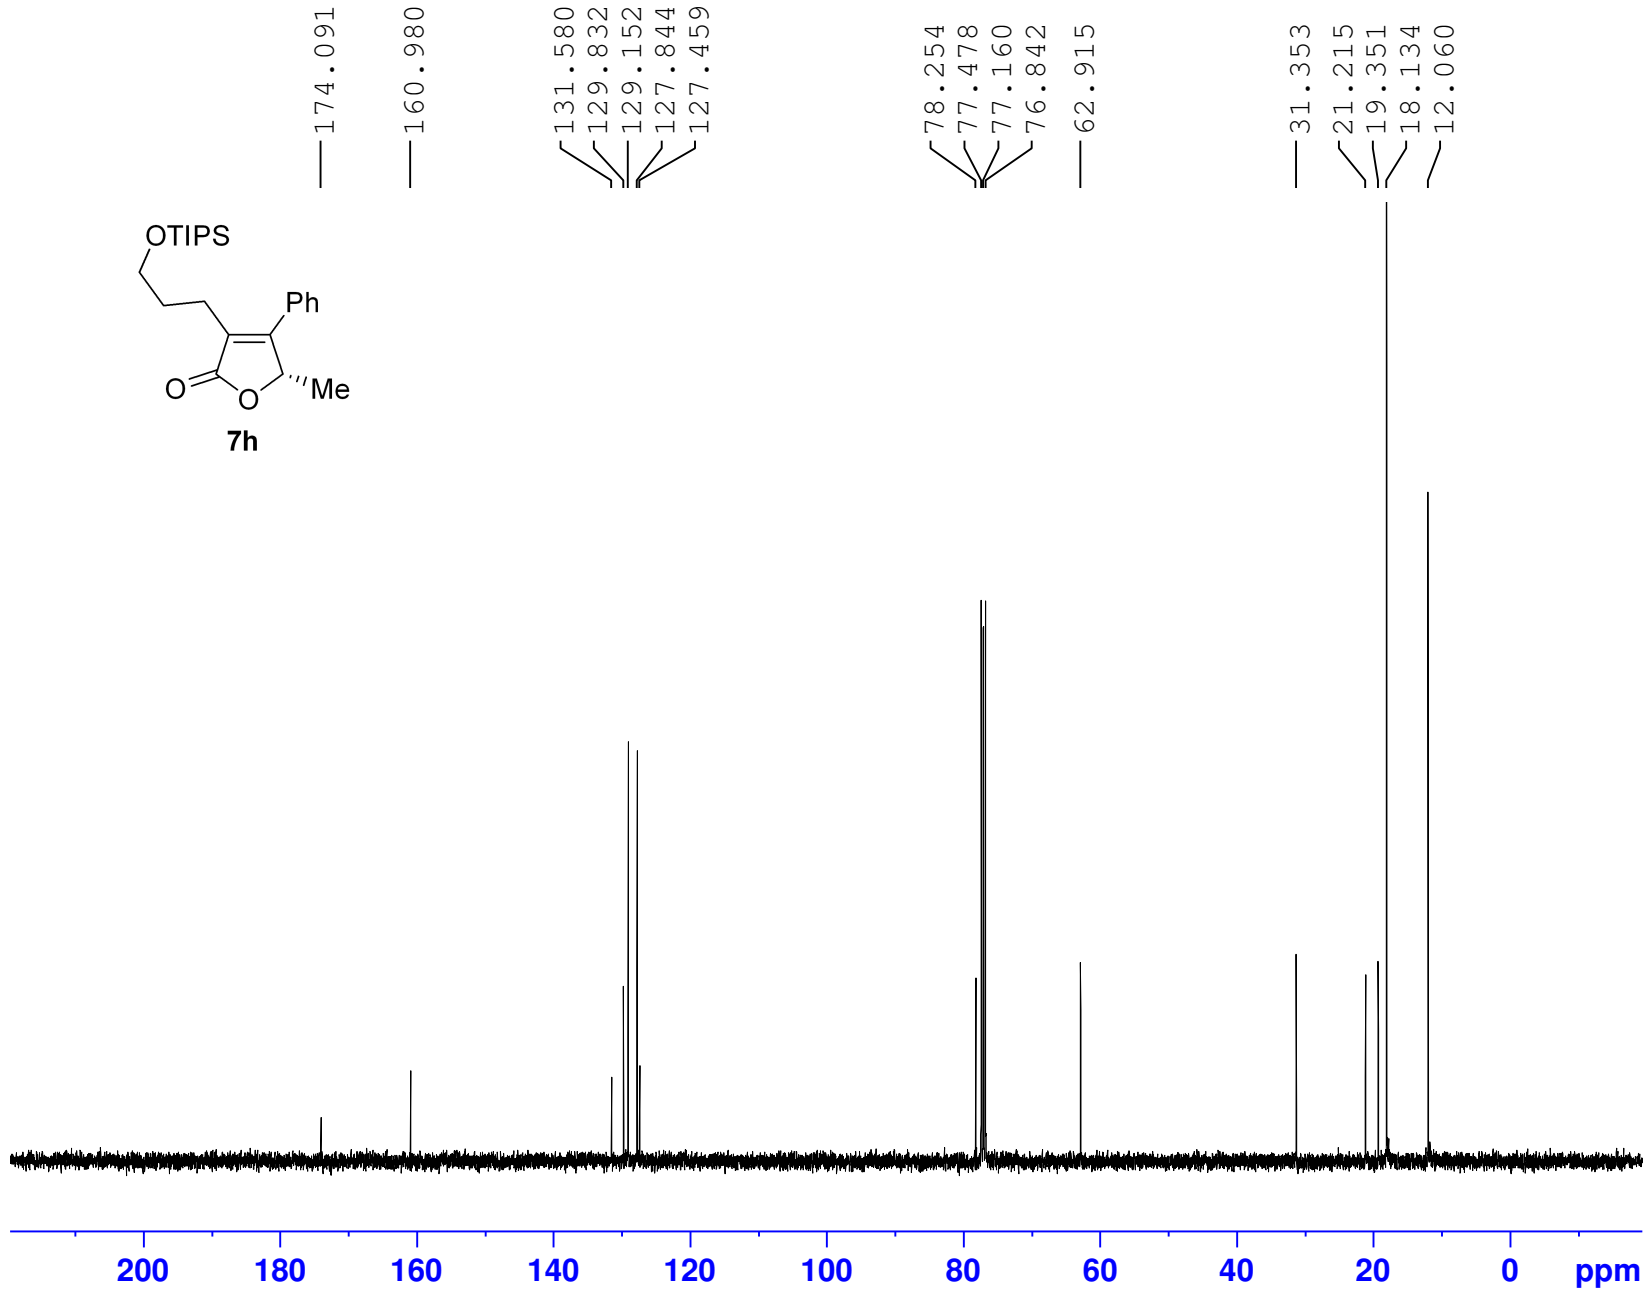

Current Data Parameters  
 NAME qh-11276-5  
 EXPNO 2  
 PROCNO 1

F2 - Acquisition Parameters  
 Date\_ 20150416  
 Time 16.39  
 INSTRUM spect  
 PROBHD 5 mm PABBO BB/  
 PULPROG zgpg30  
 TD 65536  
 SOLVENT CDC13  
 NS 47  
 DS 2  
 SWH 24038.461 Hz  
 FIDRES 0.366798 Hz  
 AQ 1.3631488 sec  
 RG 196.92  
 DW 20.800 usec  
 DE 6.50 usec  
 TE 297.2 K  
 D1 2.00000000 sec  
 D11 0.03000000 sec  
 TD0 1

===== CHANNEL f1 =====  
 SFO1 100.6228298 MHz  
 NUC1 13C  
 P1 9.70 usec  
 PLW1 46.98899841 W

===== CHANNEL f2 =====  
 SFO2 400.1316005 MHz  
 NUC2 1H  
 CPDPRG[2] waltz16  
 PCPD2 90.00 usec  
 PLW2 11.99499989 W  
 PLW12 0.34213999 W  
 PLW13 0.27713001 W

F2 - Processing parameters  
 SI 32768  
 SF 100.6127572 MHz  
 WDW EM  
 SSB 0  
 LB 1.00 Hz  
 GB 0  
 PC 1.40



7.496  
7.491  
7.475  
7.457  
7.447  
7.424  
7.421  
7.405  
7.260  
5.327  
5.310  
5.293  
5.276  
1.738  
1.730  
1.717  
1.703  
1.695  
1.682  
1.671  
1.329  
1.312  
1.246  
1.244  
1.233  
1.220  
1.209  
1.195  
1.095  
1.093  
1.083  
1.068  
1.059  
1.046  
0.927  
0.920  
0.910  
0.905  
0.897  
0.888  
0.884  
0.691  
0.685  
0.680  
0.675  
0.669  
0.664  
0.654

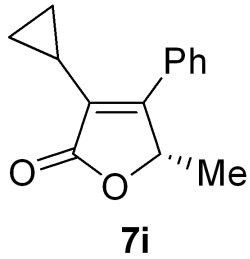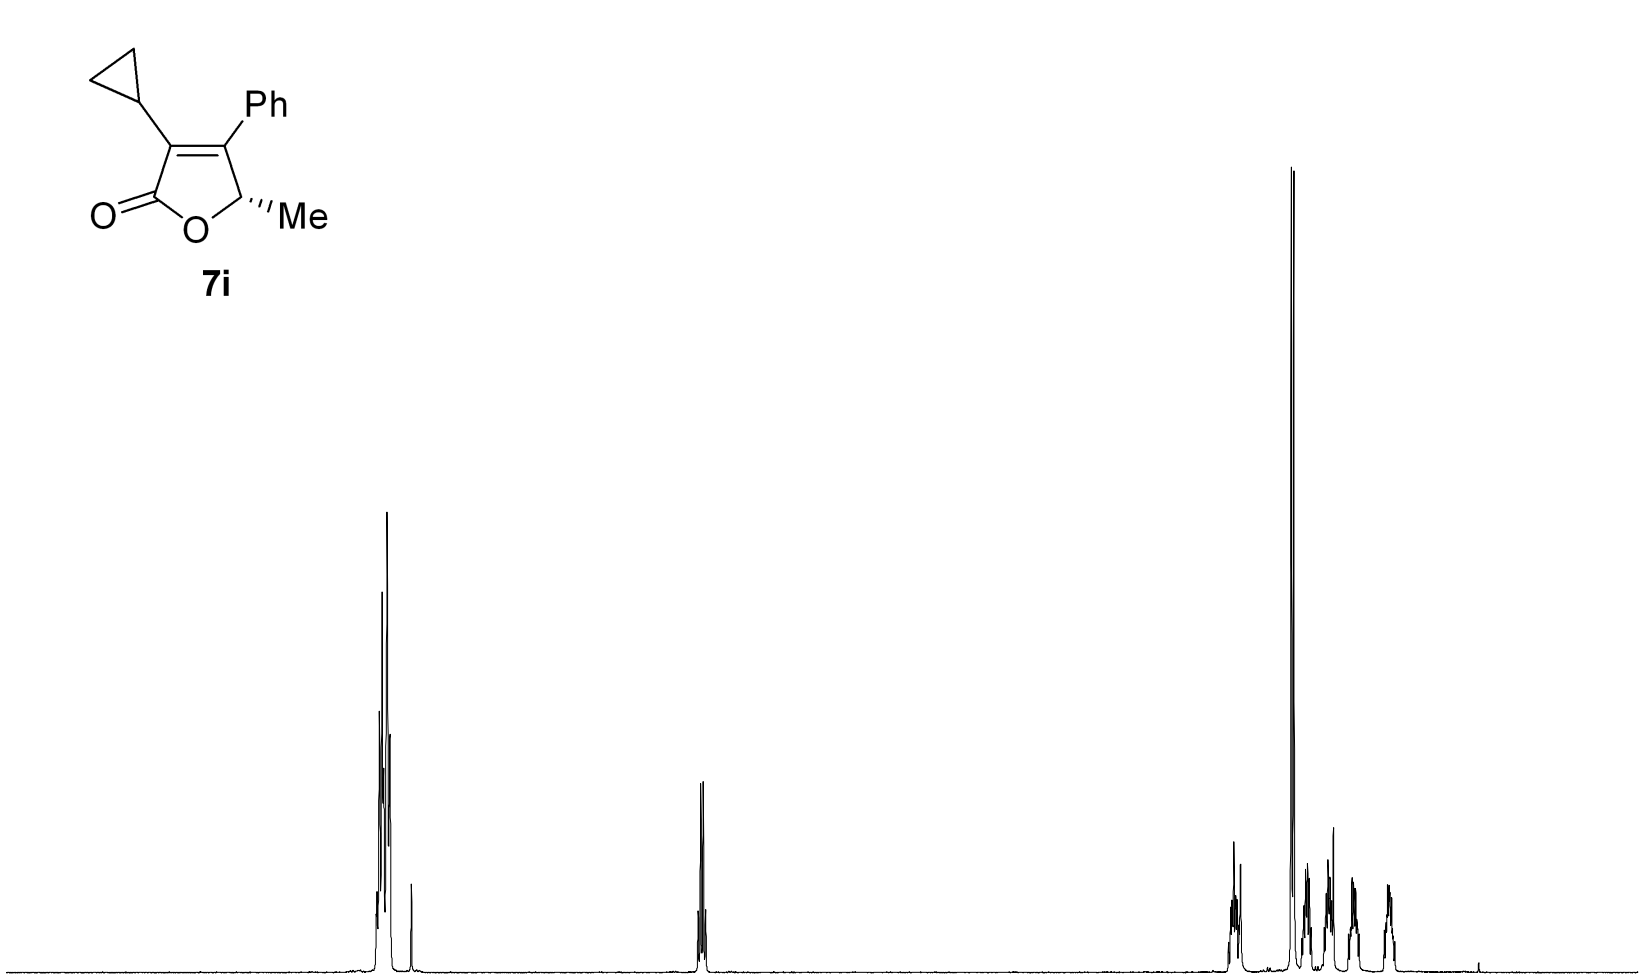

Current Data Parameters  
NAME qh-11276-2  
EXPNO 1  
PROCNO 1

F2 - Acquisition Parameters  
Date\_ 20150416  
Time 16.22  
INSTRUM spect  
PROBHD 5 mm PABBO BB/  
PULPROG zg30  
TD 65536  
SOLVENT CDC13  
NS 1  
DS 0  
SWH 8012.820 Hz  
FIDRES 0.122266 Hz  
AQ 4.0894465 sec  
RG 62.93  
DW 62.400 usec  
DE 6.50 usec  
TE 296.2 K  
D1 1.00000000 sec  
TD0 1

==== CHANNEL f1 =====  
SFO1 400.1324710 MHz  
NUC1 1H  
P1 14.50 usec  
PLW1 11.99499989 W

F2 - Processing parameters  
SI 65536  
SF 400.1300093 MHz  
WDW EM  
SSB 0  
LB 0.30 Hz  
GB 0  
PC 1.00

5.03

1.00

1.03  
3.05  
1.08  
1.17  
1.06  
1.03

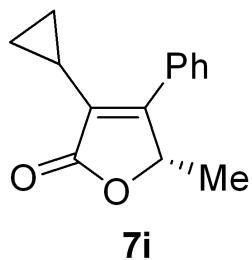

— 172.247

— 161.046

131.640  
129.651  
128.984  
128.151  
127.287

77.610  
77.476  
77.159  
76.841

— 19.170

7.631

6.552

5.365



Current Data Parameters  
NAME qh-11276-2  
EXPNO 2  
PROCNO 1

F2 - Acquisition Parameters  
Date\_ 20150416  
Time 16.24  
INSTRUM spect  
PROBHD 5 mm PABBO BB/  
PULPROG zgpg30  
TD 65536  
SOLVENT CDC13  
NS 40  
DS 2  
SWH 24038.461 Hz  
FIDRES 0.366798 Hz  
AQ 1.3631488 sec  
RG 196.92  
DW 20.800 usec  
DE 6.50 usec  
TE 297.1 K  
D1 2.00000000 sec  
D11 0.03000000 sec  
TD0 1

==== CHANNEL f1 =====  
SFO1 100.6228298 MHz  
NUC1 13C  
P1 9.70 usec  
PLW1 46.98899841 W

==== CHANNEL f2 =====  
SFO2 400.1316005 MHz  
NUC2 1H  
CPDPRG[2] waltz16  
PCPD2 90.00 usec  
PLW2 11.99499989 W  
PLW12 0.34213999 W  
PLW13 0.27713001 W

F2 - Processing parameters  
SI 32768  
SF 100.6127583 MHz  
WDW EM  
SSB 0  
LB 1.00 Hz  
GB 0  
PC 1.40

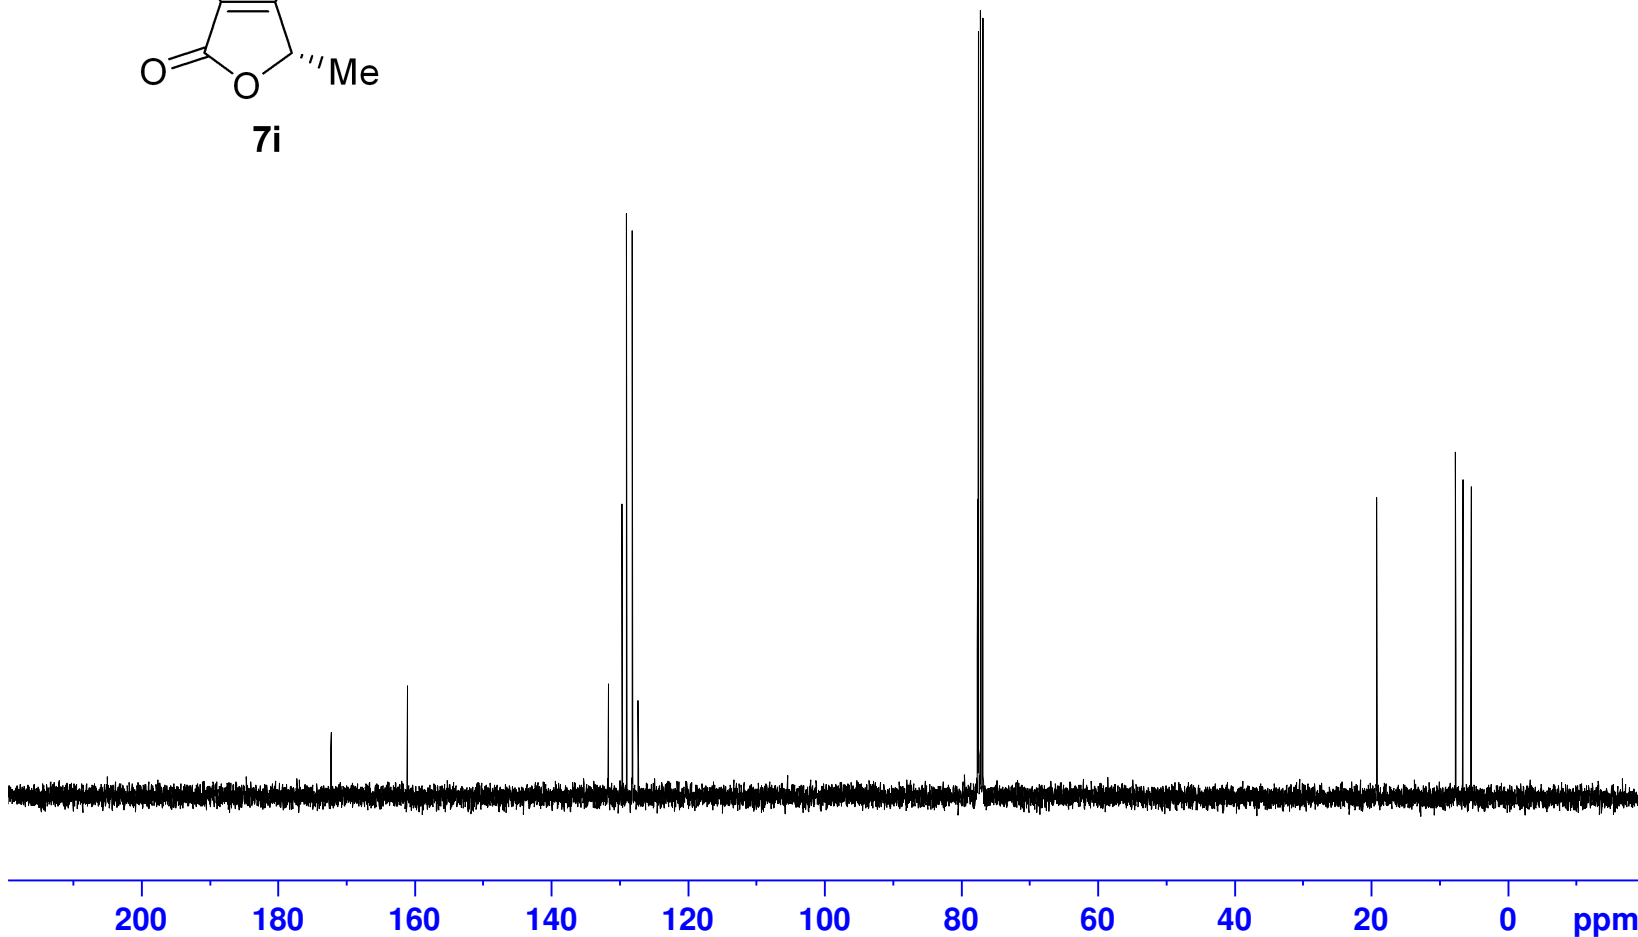

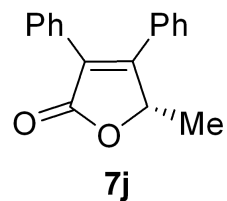

7.414  
7.405  
7.396  
7.374  
7.355  
7.328  
7.320  
7.312  
7.260  
7.246  
7.227  
5.551  
5.535  
5.518  
5.501

1.450  
1.433

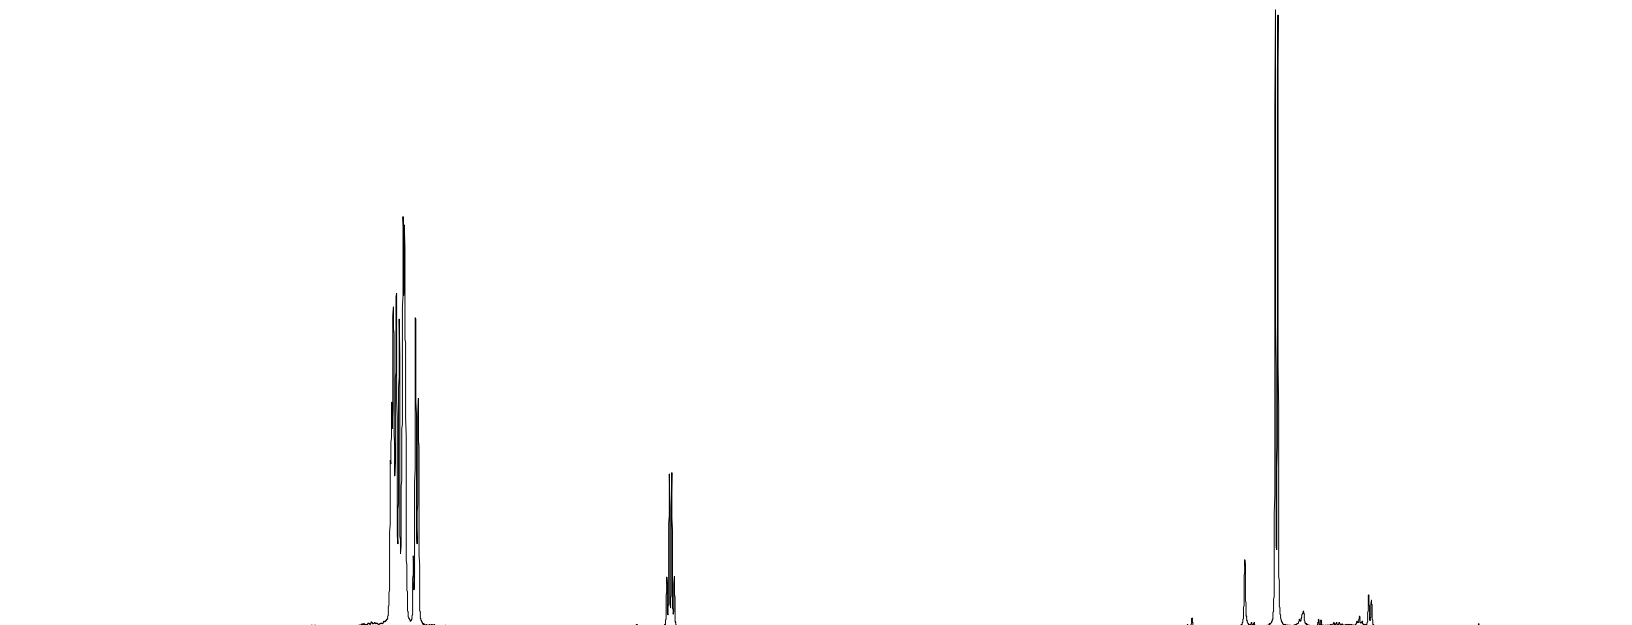

Current Data Parameters  
NAME qh-11276-6  
EXPNO 1  
PROCNO 1

F2 - Acquisition Parameters  
Date\_ 20150416  
Time 16.41  
INSTRUM spect  
PROBHD 5 mm PABBO BB/  
PULPROG zg30  
TD 65536  
SOLVENT CDCl3  
NS 2  
DS 0  
SWH 8012.820 Hz  
FIDRES 0.122266 Hz  
AQ 4.0894465 sec  
RG 54.81  
DW 62.400 usec  
DE 6.50 usec  
TE 296.5 K  
D1 1.00000000 sec  
TD0 1

==== CHANNEL f1 =====  
SFO1 400.1324710 MHz  
NUC1 1H  
P1 14.50 usec  
PLW1 11.99499989 W

F2 - Processing parameters  
SI 65536  
SF 400.1300088 MHz  
WDW EM  
SSB 0  
LB 0.30 Hz  
GB 0  
PC 1.00



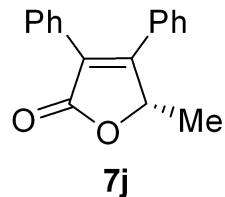

—172.410

—161.737

131.277  
 130.146  
 130.015  
 129.408  
 129.095  
 128.739  
 128.588  
 128.206  
 126.156

78.202  
 77.481  
 77.163  
 76.845

—19.232

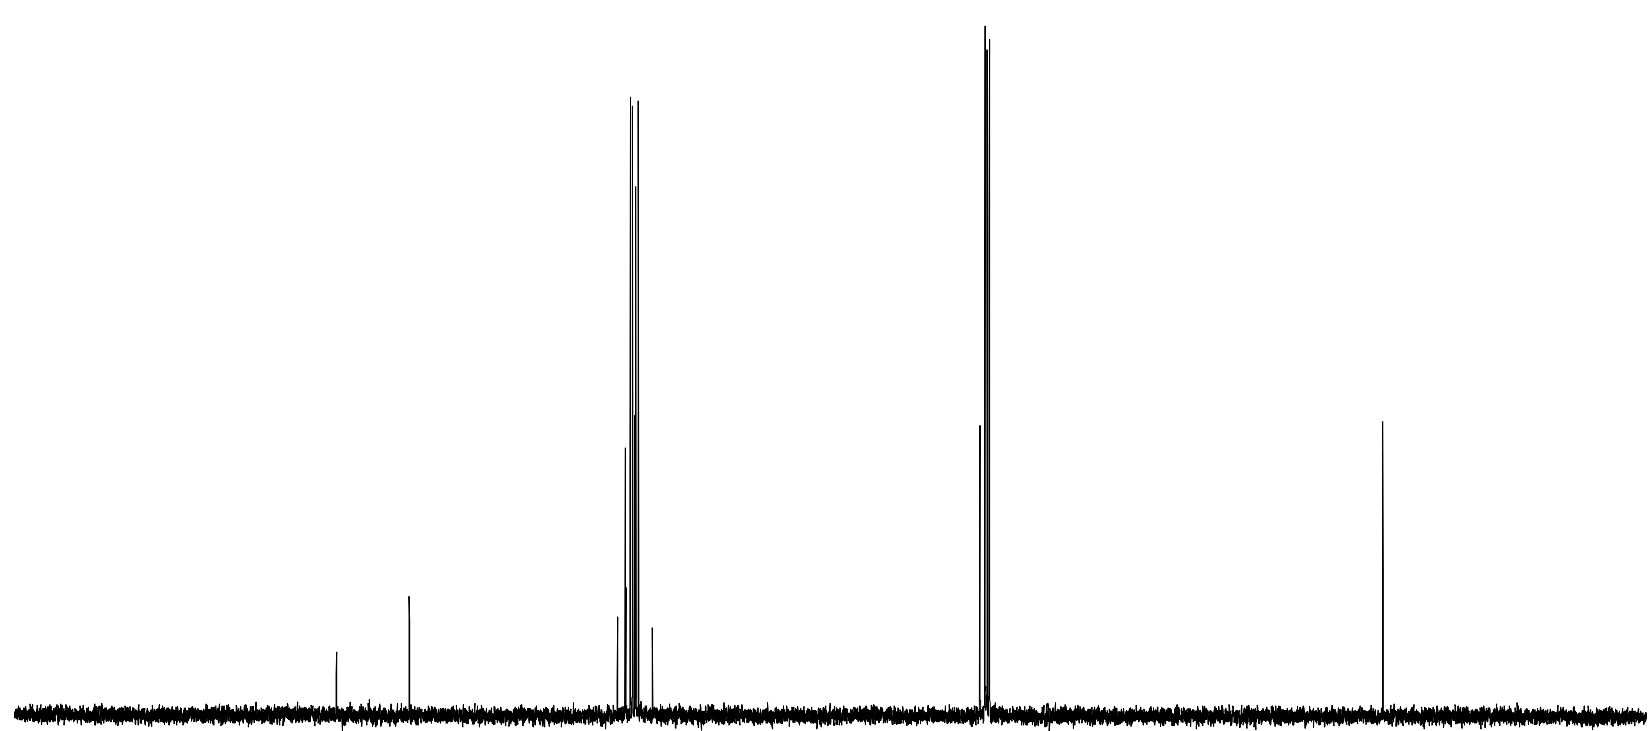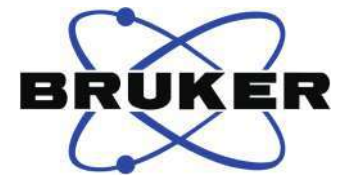

Current Data Parameters  
 NAME qh-11276-6  
 EXPNO 2  
 PROCNO 1

F2 - Acquisition Parameters  
 Date\_ 20150416  
 Time 16.44  
 INSTRUM spect  
 PROBHD 5 mm PABBO BB/  
 PULPROG zgpg30  
 TD 65536  
 SOLVENT CDC13  
 NS 50  
 DS 2  
 SWH 24038.461 Hz  
 FIDRES 0.366798 Hz  
 AQ 1.3631488 sec  
 RG 196.92  
 DW 20.800 usec  
 DE 6.50 usec  
 TE 297.2 K  
 D1 2.00000000 sec  
 D11 0.03000000 sec  
 TD0 1

==== CHANNEL f1 =====  
 SFO1 100.6228298 MHz  
 NUC1 13C  
 P1 9.70 usec  
 PLW1 46.98899841 W

==== CHANNEL f2 =====  
 SFO2 400.1316005 MHz  
 NUC2 1H  
 CPDPRG[2] waltz16  
 PCPD2 90.00 usec  
 PLW2 11.99499989 W  
 PLW12 0.34213999 W  
 PLW13 0.27713001 W

F2 - Processing parameters  
 SI 32768  
 SF 100.6127597 MHz  
 WDW EM  
 SSB 0  
 LB 1.00 Hz  
 GB 0  
 PC 1.40

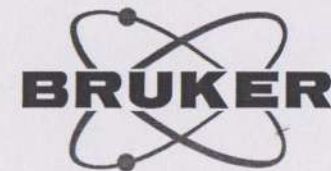

8.031  
8.010  
7.485  
7.477  
7.473  
7.462  
7.455  
7.443  
7.438  
7.427  
7.425  
7.350  
7.330  
7.280  
7.275  
7.270  
7.260  
7.257  
5.119  
5.103  
2.434  
2.310  
2.308  
2.292  
2.286  
2.271  
2.262  
2.248  
1.591  
1.511  
1.503  
1.496  
1.487  
1.421  
1.404  
1.392  
1.385  
1.361  
1.286  
1.267  
1.256  
1.252  
1.238  
1.234  
1.216  
0.839  
0.821  
0.802

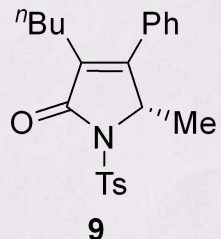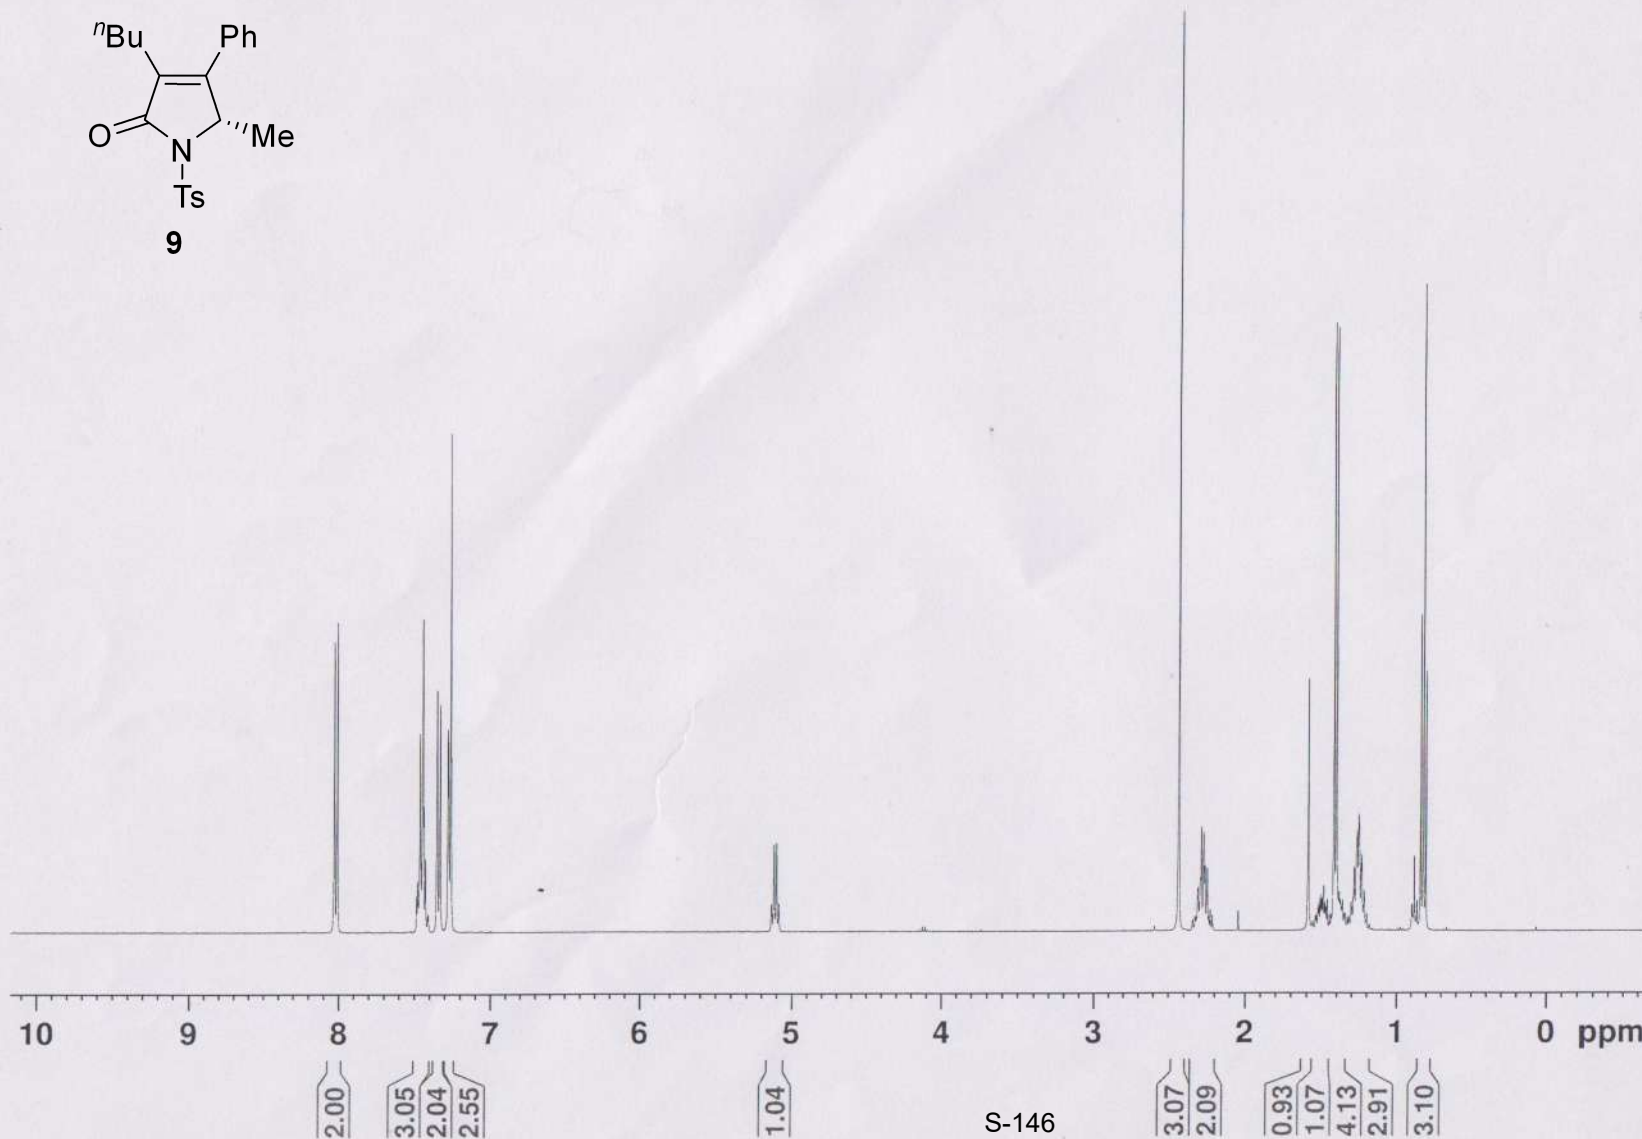

Current Data Parameters  
NAME qh-11165  
EXPNO 1  
PROCNO 1

F2 - Acquisition Parameters  
Date\_ 20150129  
Time 20.18  
INSTRUM spect  
PROBHD 5 mm PABBO BB/  
PULPROG zg30  
TD 65536  
SOLVENT CDCl3  
NS 2  
DS 2  
SWH 8012.820 Hz  
FIDRES 0.122266 Hz  
AQ 4.0894465 sec  
RG 88.84  
DW 62.400 usec  
DE 6.50 usec  
TE 295.9 K  
D1 1.00000000 sec  
TD0 1

===== CHANNEL f1 =====  
SFO1 400.1324710 MHz  
NUC1 1H  
P1 14.50 usec  
PLW1 11.99499989 W

F2 - Processing parameters  
SI 65536  
SF 400.1300094 MHz  
WDW EM  
SSB 0  
LB 0.30 Hz  
GB 0  
PC 1.00

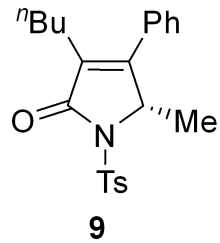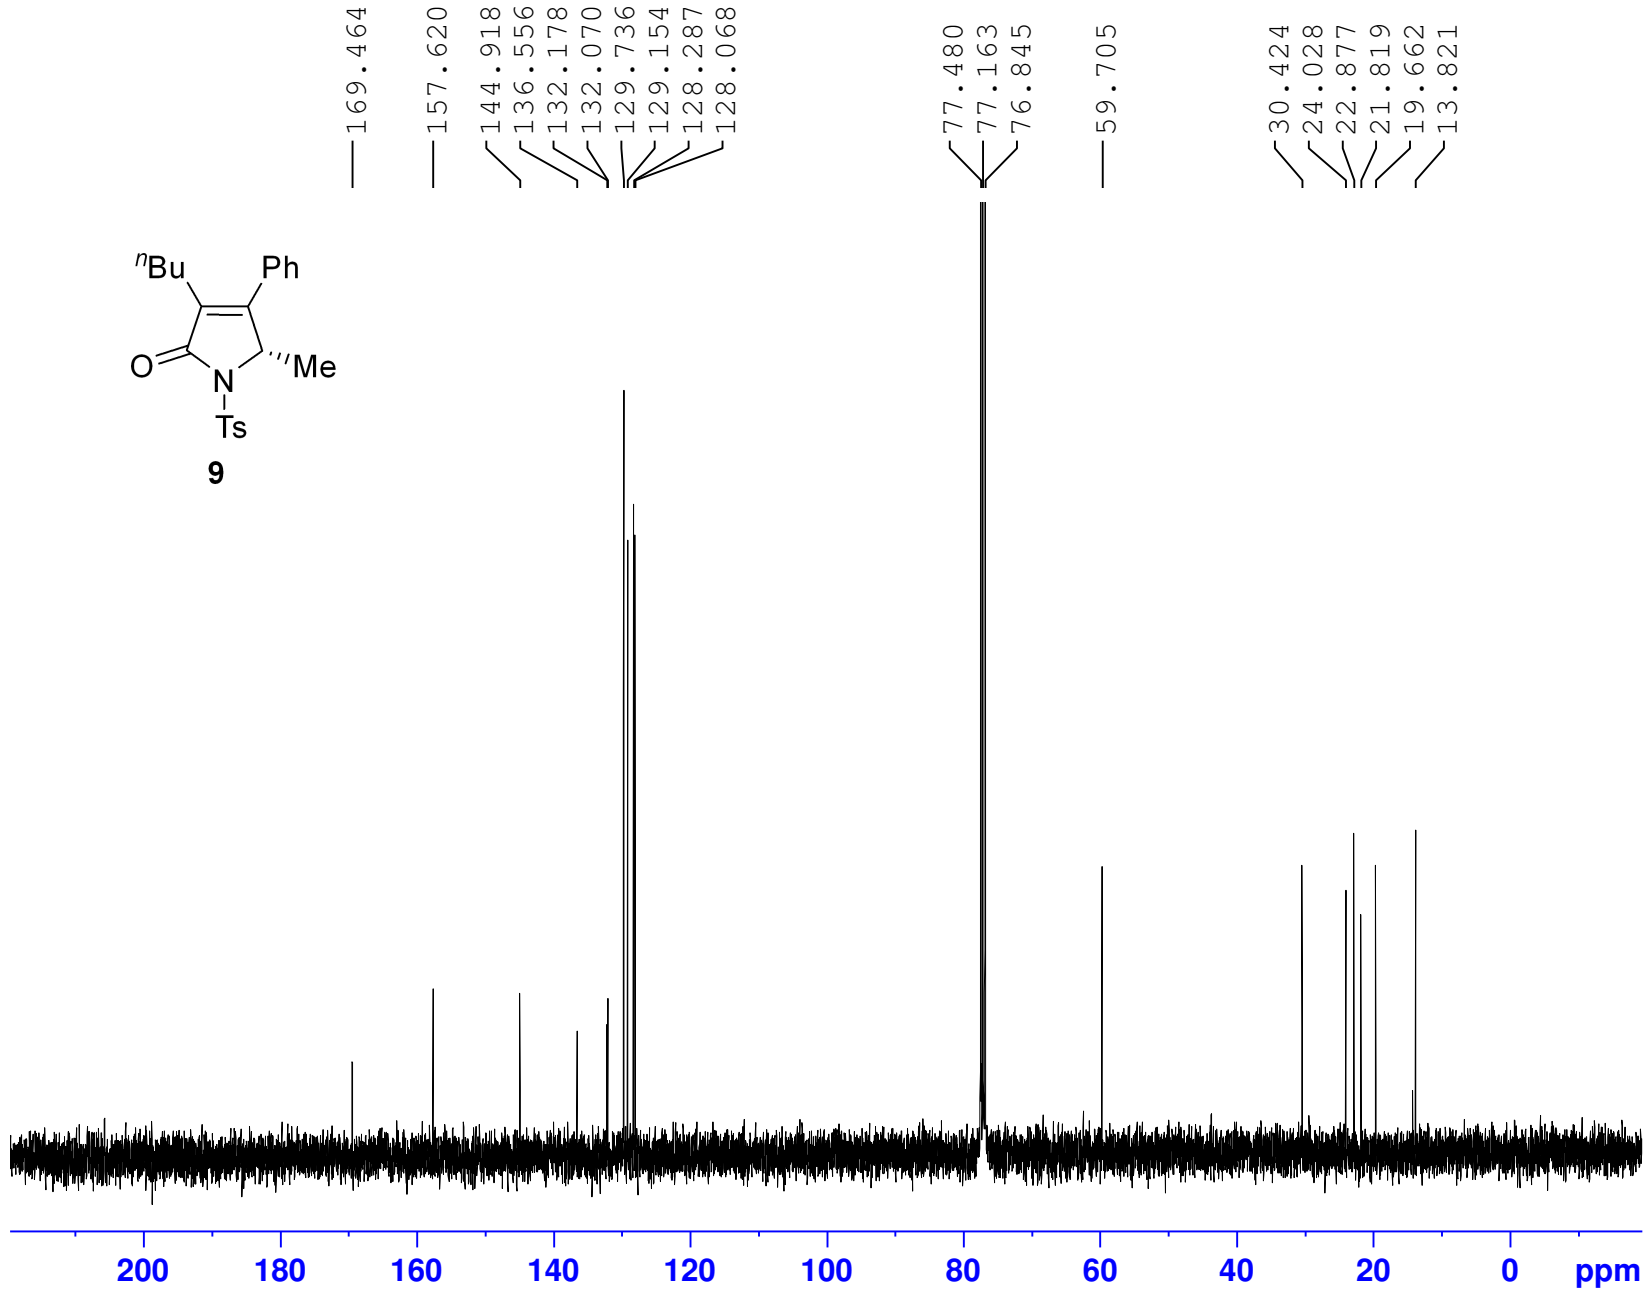

Current Data Parameters  
NAME qh-11165  
EXPNO 2  
PROCNO 1

F2 - Acquisition Parameters  
Date\_ 20150129  
Time 20.26  
INSTRUM spect  
PROBHD 5 mm PABBO BB/  
PULPROG zgpg30  
TD 65536  
SOLVENT CDC13  
NS 170  
DS 2  
SWH 24038.461 Hz  
FIDRES 0.366798 Hz  
AQ 1.3631488 sec  
RG 196.92  
DW 20.800 usec  
DE 6.50 usec  
TE 297.0 K  
D1 2.00000000 sec  
D11 0.03000000 sec  
TD0 1

==== CHANNEL f1 =====  
SFO1 100.6228298 MHz  
NUC1 13C  
P1 9.70 usec  
PLW1 46.98899841 W

==== CHANNEL f2 =====  
SFO2 400.1316005 MHz  
NUC2 1H  
CPDPRG[2] waltz16  
PCPD2 90.00 usec  
PLW2 11.99499989 W  
PLW12 0.34213999 W  
PLW13 0.27713001 W

F2 - Processing parameters  
SI 32768  
SF 100.6127554 MHz  
WDW EM  
SSB 0  
LB 1.00 Hz  
GB 0  
PC 1.40

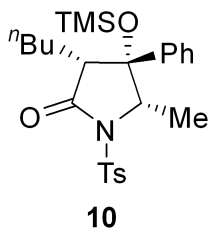

7.727  
 7.706  
 7.274  
 7.264  
 7.206  
 7.186

4.437  
 4.421  
 4.405  
 4.388  
 2.835  
 2.823  
 2.814  
 2.802  
 2.412  
 1.735  
 1.721  
 1.711  
 1.696  
 1.682  
 1.670  
 1.665  
 1.658  
 1.573  
 1.568  
 1.548  
 1.532  
 1.313  
 1.308  
 1.295  
 1.289  
 1.277  
 1.263  
 1.250  
 1.227

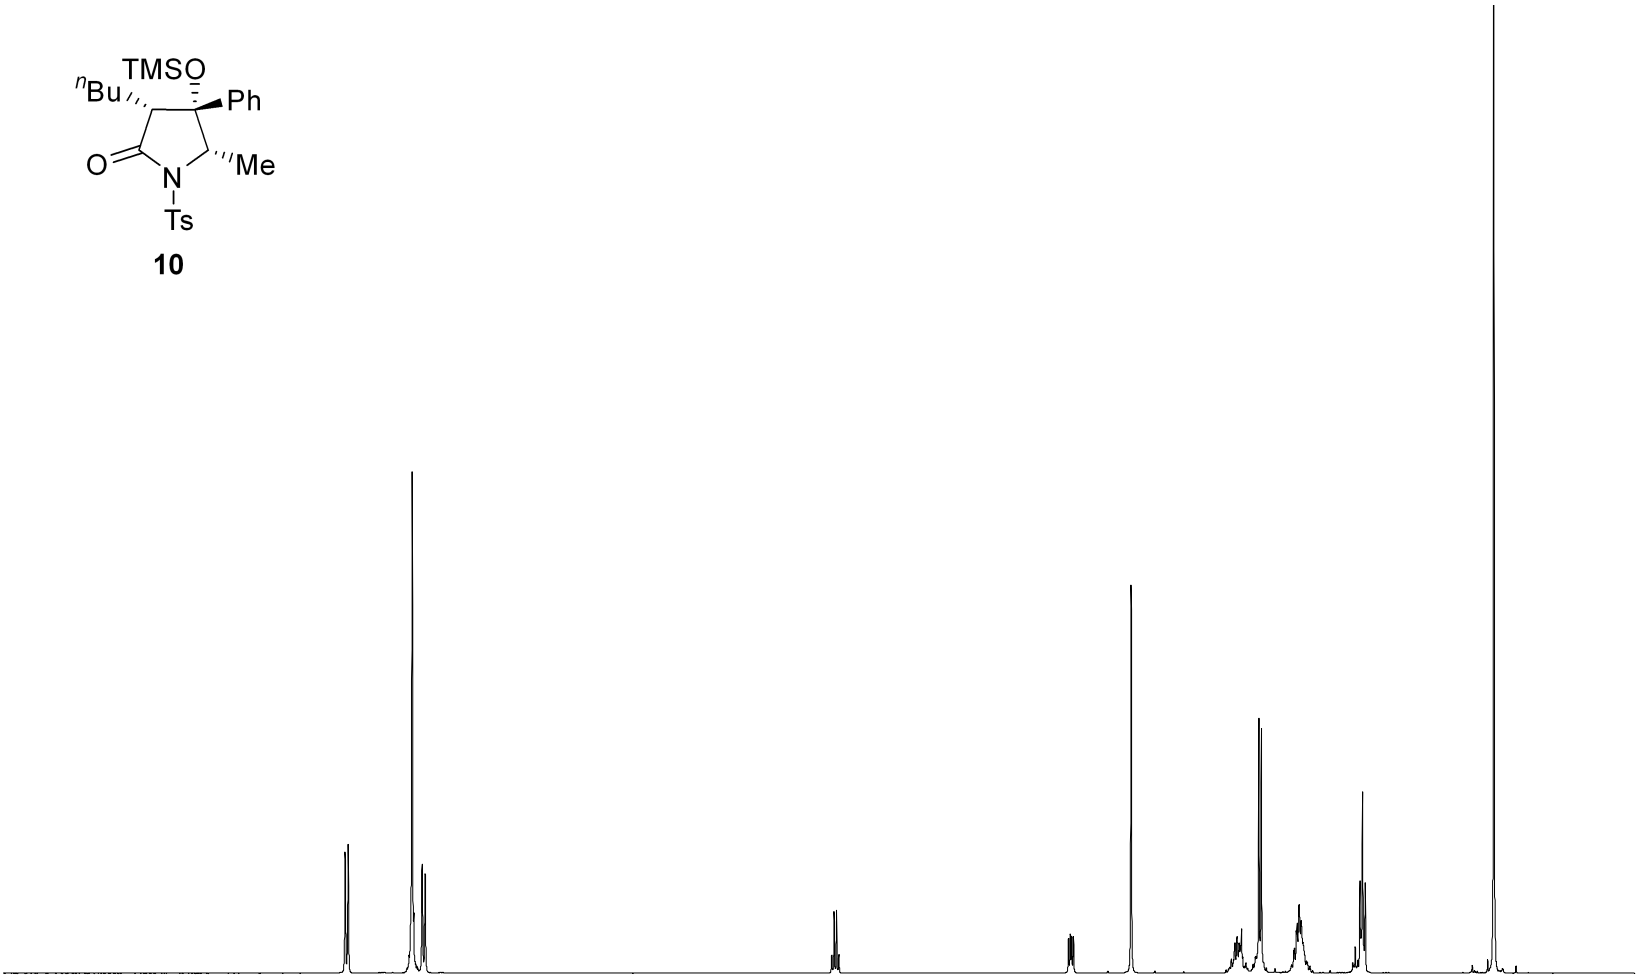

Current Data Parameters  
 NAME qh-11182  
 EXPNO 1  
 PROCNO 1

F2 - Acquisition Parameters  
 Date\_ 20150212  
 Time 12.14  
 INSTRUM spect  
 PROBHD 5 mm PABBO BB/  
 PULPROG zg30  
 TD 65536  
 SOLVENT CDC13  
 NS 2  
 DS 0  
 SWH 8012.820 Hz  
 FIDRES 0.122266 Hz  
 AQ 4.0894465 sec  
 RG 31.55  
 DW 62.400 usec  
 DE 6.50 usec  
 TE 297.0 K  
 D1 1.00000000 sec  
 TD0 1

===== CHANNEL f1 =====  
 SFO1 400.1324710 MHz  
 NUC1 1H  
 P1 14.50 usec  
 PLW1 11.99499989 W

F2 - Processing parameters  
 SI 65536  
 SF 400.1300000 MHz  
 WDW EM  
 SSB 0  
 LB 0.30 Hz  
 GB 0  
 PC 1.00

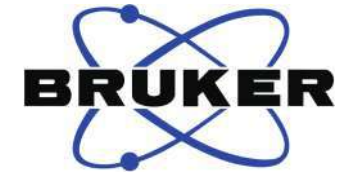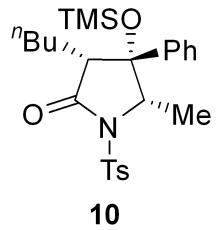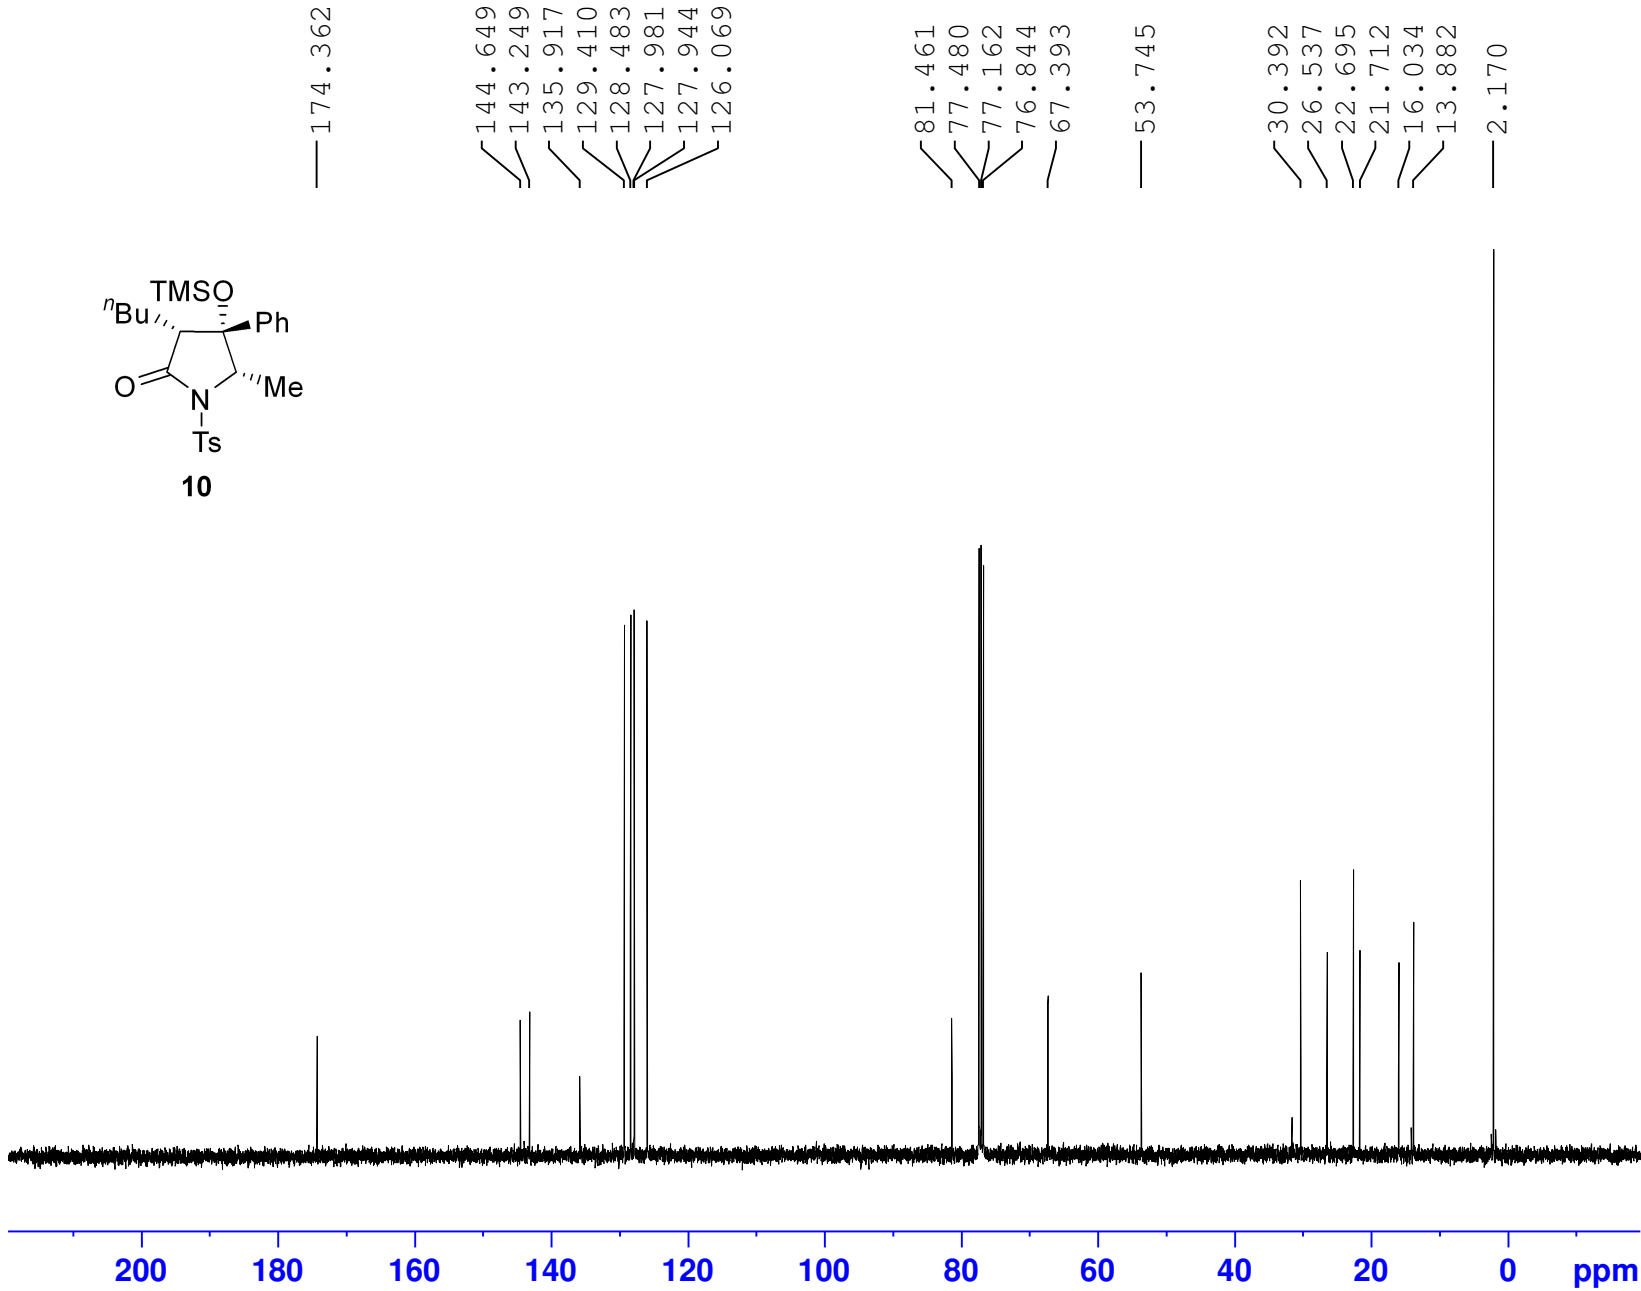

Current Data Parameters  
NAME qh-11182  
EXPNO 2  
PROCNO 1

F2 - Acquisition Parameters  
Date\_ 20150212  
Time 12.17  
INSTRUM spect  
PROBHD 5 mm PABBO BB/  
PULPROG zgpg30  
TD 65536  
SOLVENT CDC13  
NS 50  
DS 2  
SWH 24038.461 Hz  
FIDRES 0.366798 Hz  
AQ 1.3631488 sec  
RG 196.92  
DW 20.800 usec  
DE 6.50 usec  
TE 297.8 K  
D1 2.0000000 sec  
D11 0.0300000 sec  
TD0 1

==== CHANNEL f1 =====  
SFO1 100.6228298 MHz  
NUC1 13C  
P1 9.70 usec  
PLW1 46.98899841 W

==== CHANNEL f2 =====  
SFO2 400.1316005 MHz  
NUC2 1H  
CPDPRG[2] waltz16  
PCPD2 90.00 usec  
PLW2 11.99499989 W  
PLW12 0.34213999 W  
PLW13 0.27713001 W

F2 - Processing parameters  
SI 32768  
SF 100.6127590 MHz  
WDW EM  
SSB 0  
LB 1.00 Hz  
GB 0  
PC 1.40







7.811  
7.791  
7.388  
7.368  
7.318  
7.314  
7.297  
7.278  
7.260  
7.257  
7.254  
7.245  
7.239  
7.170  
7.166  
7.149  
5.621  
5.608  
5.596  
3.753  
3.741  
3.626  
3.610  
3.594  
3.248  
2.480  
1.836  
1.824  
1.819  
1.807  
1.594  
1.260  
1.244  
1.175  
1.157  
1.153  
1.140  
1.135  
1.121  
1.051  
1.037  
1.028  
1.010  
0.997  
0.990  
0.791  
0.773  
0.754

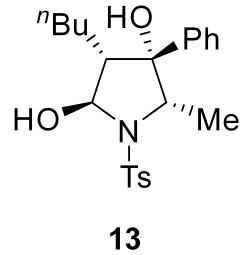

Current Data Parameters  
NAME qh-11176  
EXPNO 2  
PROCNO 1

F2 - Acquisition Parameters  
Date\_ 20150211  
Time 15.14  
INSTRUM spect  
PROBHD 5 mm PABBO BB/  
PULPROG zg30  
TD 65536  
SOLVENT CDC13  
NS 1  
DS 0  
SWH 8012.820 Hz  
FIDRES 0.122266 Hz  
AQ 4.0894465 sec  
RG 45.67  
DW 62.400 usec  
DE 6.50 usec  
TE 295.9 K  
D1 1.00000000 sec  
TD0 1

==== CHANNEL f1 =====  
SFO1 400.1324710 MHz  
NUC1 1H  
P1 14.50 usec  
PLW1 11.99499989 W

F2 - Processing parameters  
SI 65536  
SF 400.1300093 MHz  
WDW EM  
SSB 0  
LB 0.30 Hz  
GB 0  
PC 1.00

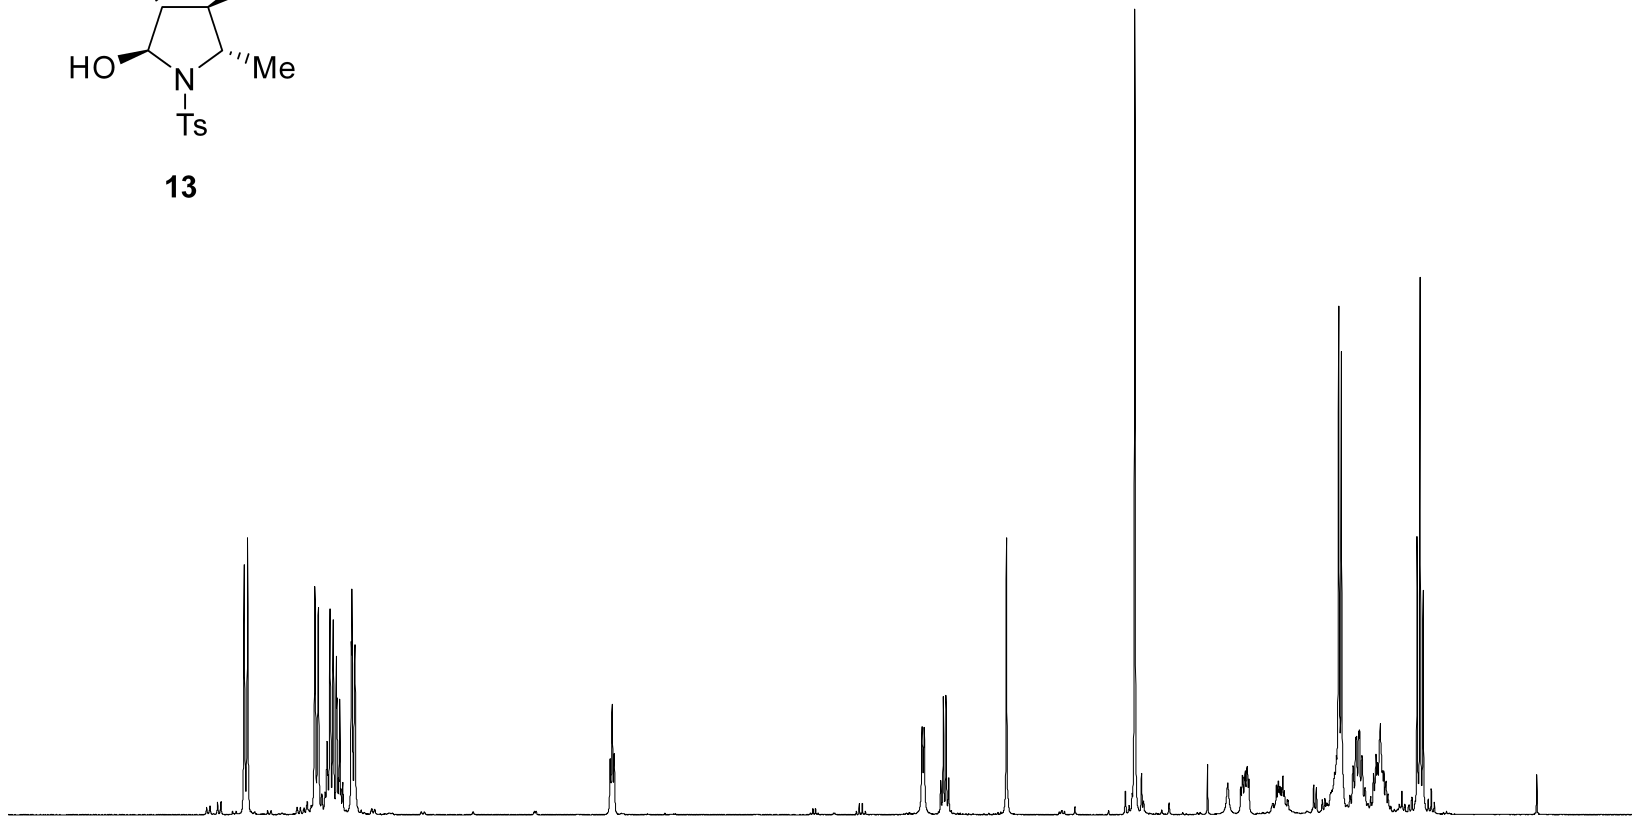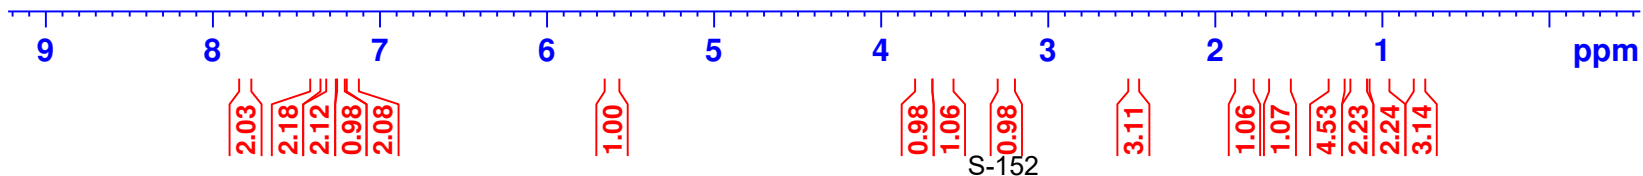

S-152



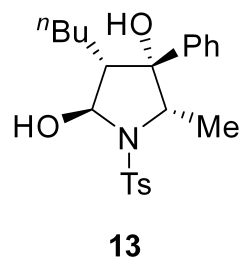

144.015  
140.091  
136.087  
129.987  
128.448  
127.484  
127.296  
125.224

85.733  
83.960  
77.477  
77.159  
76.841  
67.712

52.848

29.615  
22.773  
21.907  
21.732  
14.616  
13.956

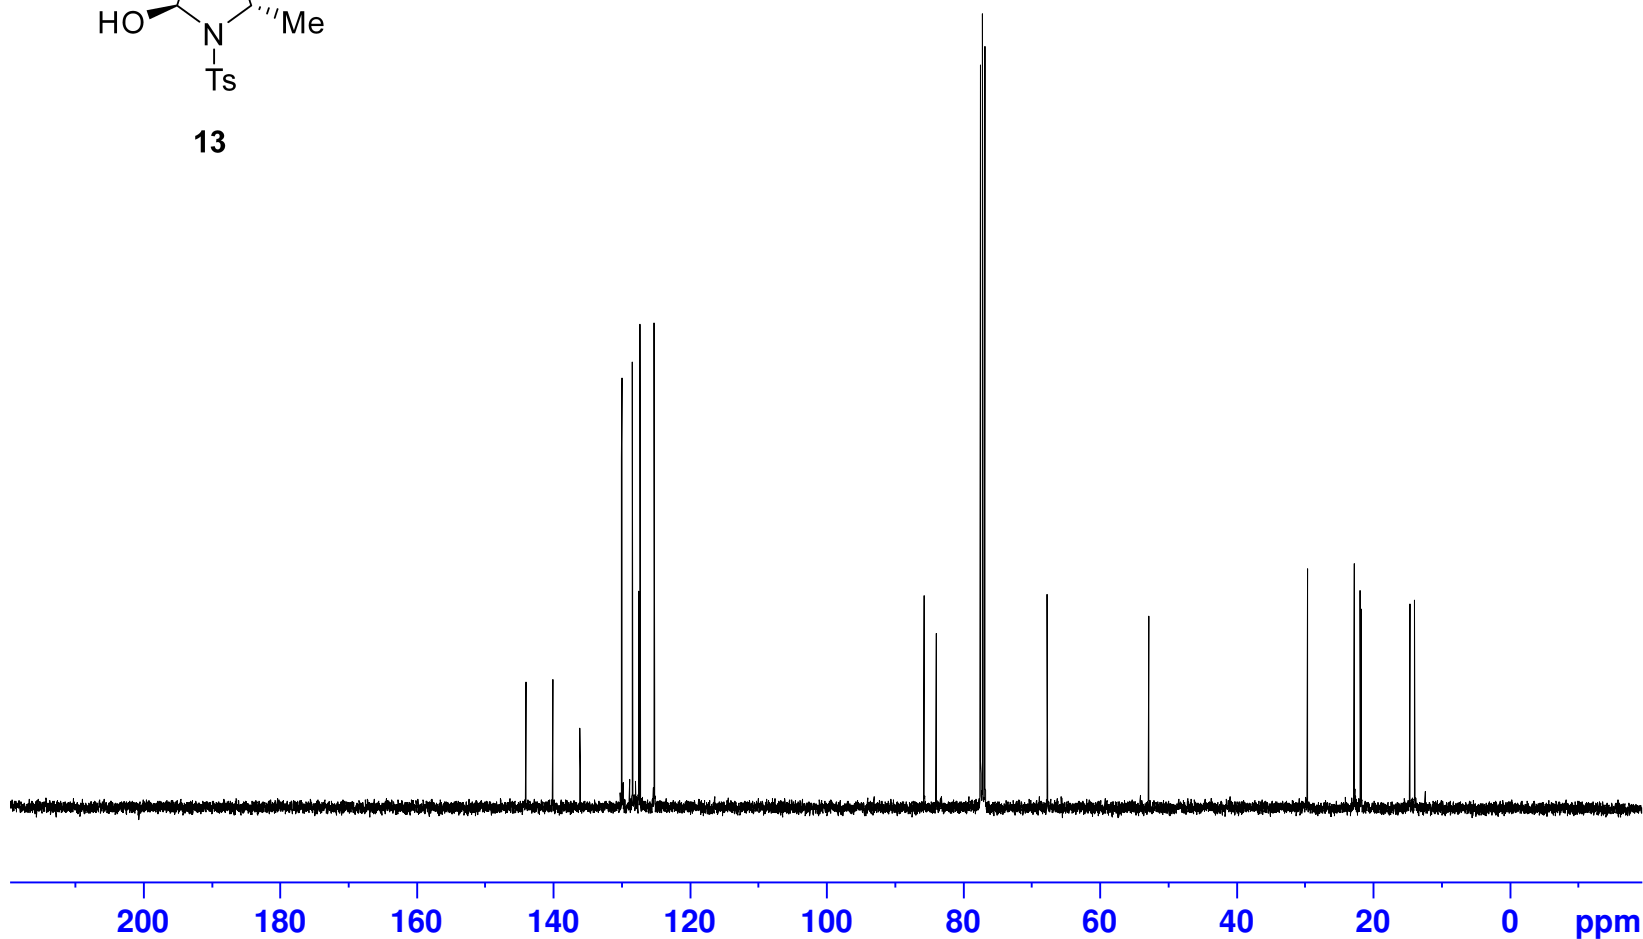

Current Data Parameters  
NAME qh-11176  
EXPNO 3  
PROCNO 1

F2 - Acquisition Parameters  
Date\_ 20150211  
Time 15.17  
INSTRUM spect  
PROBHD 5 mm PABBO BB/  
PULPROG zgpg30  
TD 65536  
SOLVENT CDC13  
NS 134  
DS 2  
SWH 24038.461 Hz  
FIDRES 0.366798 Hz  
AQ 1.3631488 sec  
RG 196.92  
DW 20.800 usec  
DE 6.50 usec  
TE 296.9 K  
D1 2.00000000 sec  
D11 0.03000000 sec  
TD0 1

==== CHANNEL f1 =====  
SFO1 100.6228298 MHz  
NUC1 13C  
P1 9.70 usec  
PLW1 46.98899841 W

==== CHANNEL f2 =====  
SFO2 400.1316005 MHz  
NUC2 1H  
CPDPRG[2] waltz16  
PCPD2 90.00 usec  
PLW2 11.99499989 W  
PLW12 0.34213999 W  
PLW13 0.27713001 W

F2 - Processing parameters  
SI 32768  
SF 100.6127583 MHz  
WDW EM  
SSB 0  
LB 1.00 Hz  
GB 0  
PC 1.40



7.812  
7.791  
7.405  
7.385  
7.260  
7.218  
7.206  
7.201  
6.862  
6.853  
6.843  
6.134  
6.114  
6.091  
5.156  
5.123  
4.153  
4.144  
4.133  
4.123  
3.661  
3.645  
2.688  
2.670  
2.511  
2.490  
1.869  
1.813  
1.794  
1.774  
1.348  
1.321  
1.272  
1.256  
1.106  
1.091  
1.074  
1.059  
1.043  
0.965  
0.947  
0.940  
0.919  
0.908  
0.885  
0.764  
0.747  
0.730

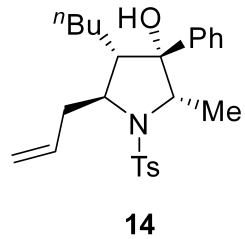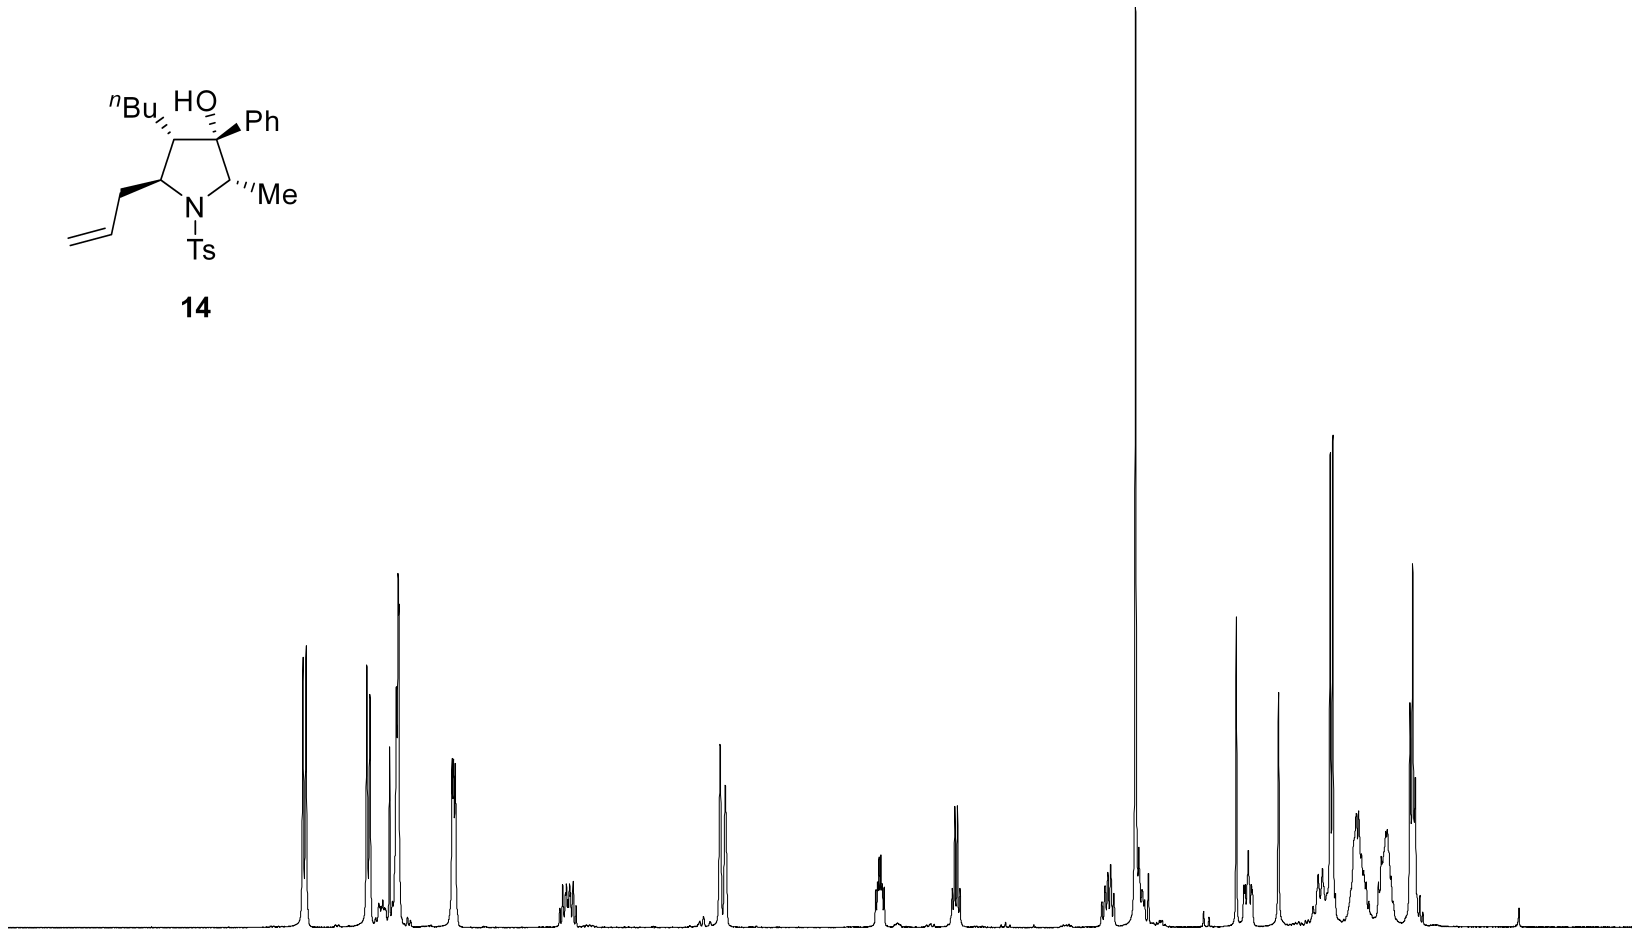

Current Data Parameters  
NAME qh-11195  
EXPNO 1  
PROCNO 1

F2 - Acquisition Parameters  
Date\_ 20150304  
Time 16.55  
INSTRUM spect  
PROBHD 5 mm PABBO BB/  
PULPROG zg30  
TD 65536  
SOLVENT CDCl3  
NS 4  
DS 0  
SWH 8012.820 Hz  
FIDRES 0.122266 Hz  
AQ 4.0894465 sec  
RG 70.97  
DW 62.400 usec  
DE 6.50 usec  
TE 295.8 K  
D1 1.00000000 sec  
TD0 1

==== CHANNEL f1 =====  
SFO1 400.1324710 MHz  
NUC1 1H  
P1 14.50 usec  
PLW1 11.99499989 W

F2 - Processing parameters  
SI 65536  
SF 400.1300088 MHz  
WDW EM  
SSB 0  
LB 0.30 Hz  
GB 0  
PC 1.00

9 8 7 6 5 4 3 2 1 0 ppm

2.20  
2.12  
3.06  
2.01  
1.00  
2.00  
1.03  
1.09  
1.05  
4.18  
0.99  
1.10  
1.12  
3.34  
3.39  
2.58  
3.17

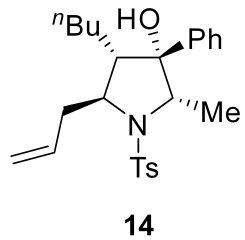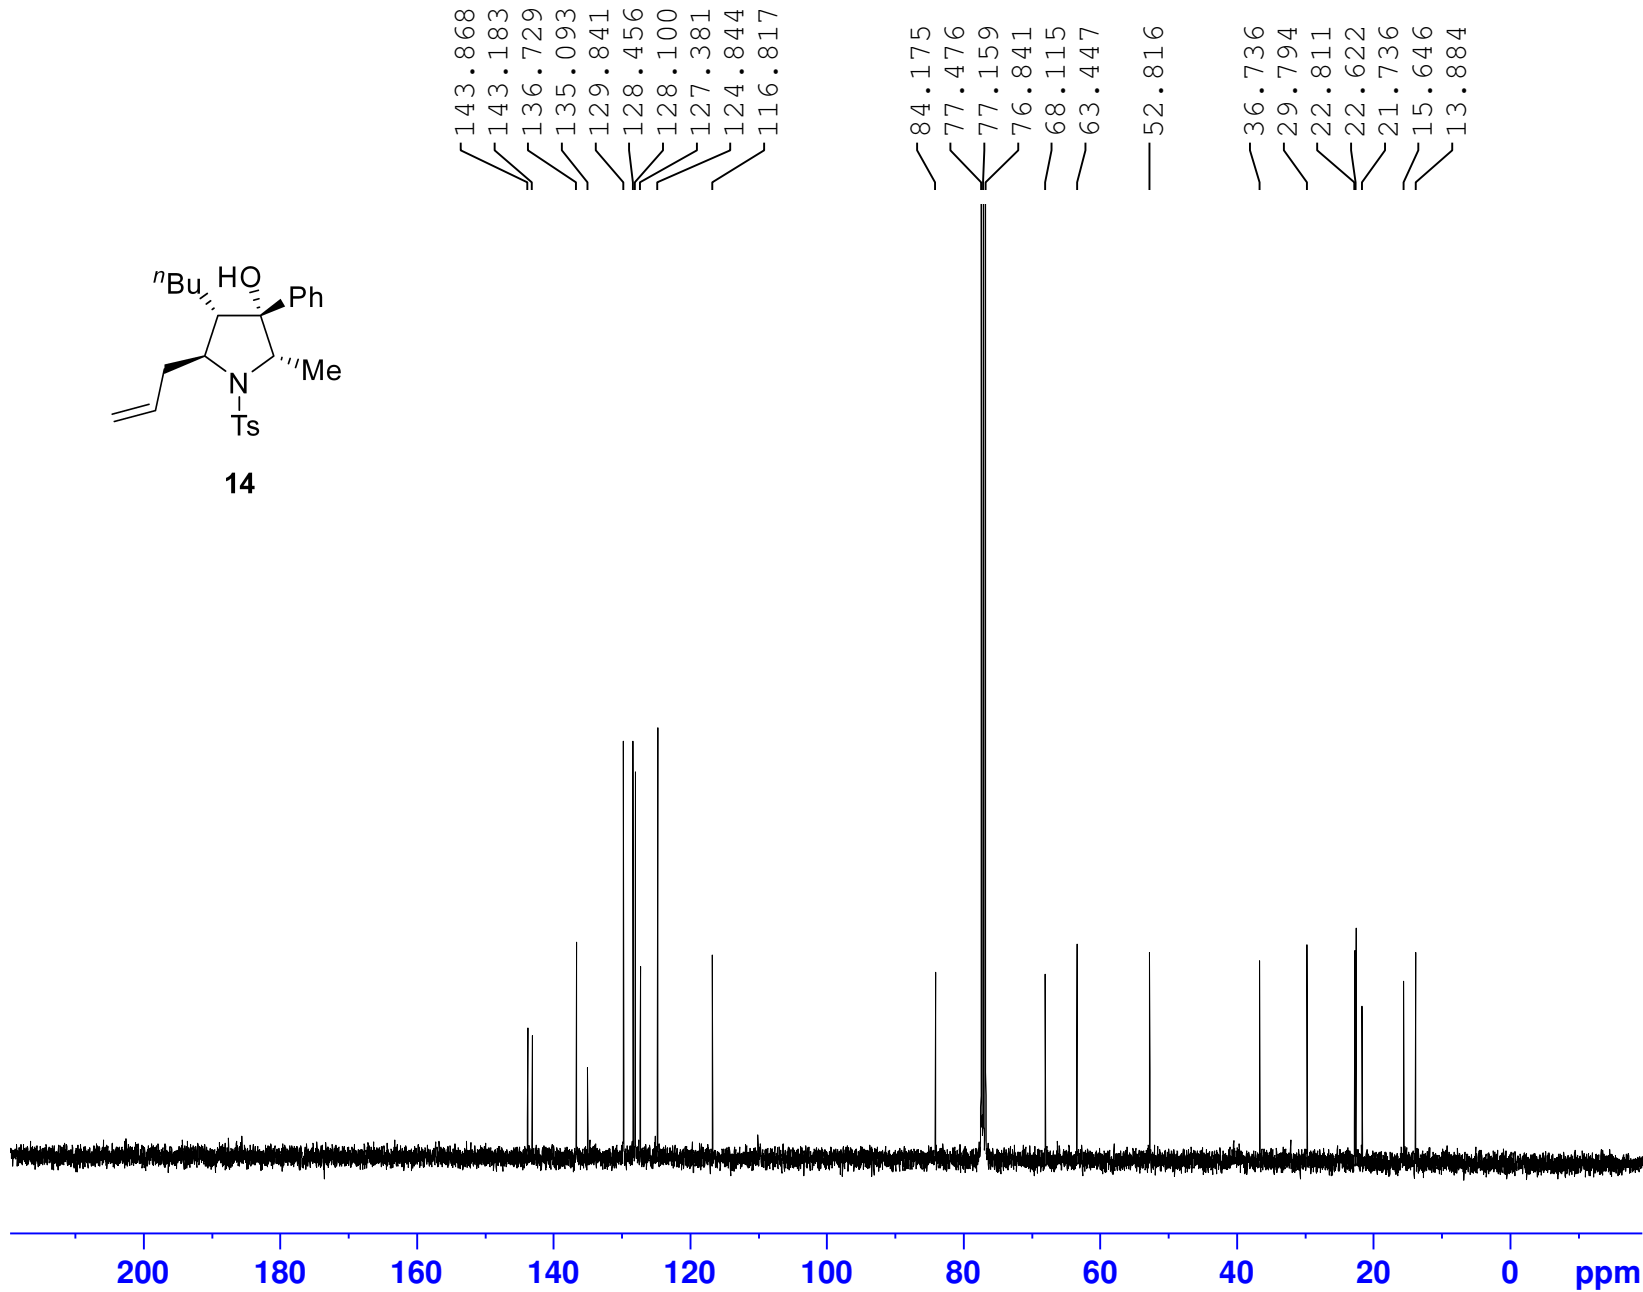

Current Data Parameters  
NAME qh-11195  
EXPNO 2  
PROCNO 1

F2 - Acquisition Parameters  
Date\_ 20150304  
Time 17.00  
INSTRUM spect  
PROBHD 5 mm PABBO BB/  
PULPROG zgpg30  
TD 65536  
SOLVENT CDC13  
NS 210  
DS 2  
SWH 24038.461 Hz  
FIDRES 0.366798 Hz  
AQ 1.3631488 sec  
RG 196.92  
DW 20.800 usec  
DE 6.50 usec  
TE 296.8 K  
D1 2.00000000 sec  
D11 0.03000000 sec  
TD0 1

==== CHANNEL f1 =====  
SFO1 100.6228298 MHz  
NUC1 13C  
P1 9.70 usec  
PLW1 46.98899841 W

==== CHANNEL f2 =====  
SFO2 400.1316005 MHz  
NUC2 1H  
CPDPRG[2] waltz16  
PCPD2 90.00 usec  
PLW2 11.99499989 W  
PLW12 0.34213999 W  
PLW13 0.27713001 W

F2 - Processing parameters  
SI 32768  
SF 100.6127561 MHz  
WDW EM  
SSB 0  
LB 1.00 Hz  
GB 0  
PC 1.40
